# Supplementary material for: Sex-biased RNA editing in Tibetan Placentas enhances hypoxia adaptation via developmental and immune pathways
Source: Research Square preprint supplement (doi:10.21203/rs.3.rs-7228927/v1), 2025-12-04
Supplement: Supplementary file 1 [file 52b4da561086939cbb9c0c11.xlsx]

## Sheet: 1
Supplementary table 1. Differential RNA editing sites in human placental tissues
RNA editing sites	Ensembl id	Tissues	Diff_type	P value	Gene regions	Repeated sequence
2-201219195	ENSG00000003400	Chorionic Plate	up_sites	0.0129569	UTR3	Alu-SINE
6-26095240	ENSG00000010704	Chorion	up_sites	0.0016761	UTR3	Alu-SINE
6-26095414	ENSG00000010704	Umbilical Cord	up_sites	0.00428807	UTR3	Alu-SINE
6-26096395	ENSG00000010704	Chorion	up_sites	0.006627	UTR3	Alu-SINE
X-119538506	ENSG00000018610	Chorion	up_sites	0.00105643	UTR3	Alu-SINE
X-119538562	ENSG00000018610	Amnion	up_sites	0.000476095	UTR3	Alu-SINE
2-206122837	ENSG00000023228	Amnion	up_sites	0.00168339	UTR3	Alu-SINE
6-13788158	ENSG00000050393	Chorion	up_sites	0.000856086	UTR3	Alu-SINE
1-19259964	ENSG00000053372	Amnion	up_sites	0.00488819	UTR3	Alu-SINE
1-19260007	ENSG00000053372	Amnion	up_sites	0.0342932	UTR3	Alu-SINE
2-37103288	ENSG00000055332	Amnion	up_sites	0.0146083	UTR3	Alu-SINE
12-7964053	ENSG00000059804	Chorion	up_sites	0.014119	ncRNA_intronic	Alu-SINE
12-7964078	ENSG00000059804	Chorion	up_sites	0.00936515	ncRNA_intronic	Alu-SINE
12-7964147	ENSG00000059804	Chorion	up_sites	0.0076181	ncRNA_intronic	Alu-SINE
12-7970468	ENSG00000059804	Chorion	up_sites	0.00105087	ncRNA_intronic	Alu-SINE
12-7970530	ENSG00000059804	Chorion	up_sites	0.00247002	ncRNA_intronic	Alu-SINE
10-68759232	ENSG00000060339	Villus of Maternal	up_sites	0.0228712	intronic	Alu-SINE
1-2171495	ENSG00000067606	Chorionic Plate	down_sites	0.0162255	intronic	Alu-SINE
2-48604208	ENSG00000068781	Chorionic Plate	up_sites	0.00245856	intronic	Alu-SINE
22-19452767	ENSG00000070010	Villus of Fetal	up_sites	0.0244175	intronic	Alu-SINE
17-68424794	ENSG00000070540	Villus of Intermediate	up_sites	0.00441932	ncRNA_intronic	Alu-SINE
2-130362244	ENSG00000072135	Amnion	up_sites	0.0105561	intronic	Alu-SINE
16-15701178	ENSG00000072864	Umbilical Cord	up_sites	0.00553746	intronic	Alu-SINE
17-3823622	ENSG00000074356	Amnion	up_sites	0.00391915	intronic	Alu-SINE
X-119538506	ENSG00000077721	Chorion	up_sites	0.00105643	UTR3	Alu-SINE
X-119538562	ENSG00000077721	Amnion	up_sites	0.000476095	UTR3	Alu-SINE
6-108042693	ENSG00000081087	Chorion	up_sites	0.00775656	UTR3	Alu-SINE
6-89634503	ENSG00000083099	Amnion	up_sites	0.0118036	UTR3	Alu-SINE
17-78422975	ENSG00000087157	Amnion	up_sites	0.00243719	intronic	Alu-SINE
20-3867511	ENSG00000088888	Amnion	up_sites	0.00345091	UTR3	Alu-SINE
10-95390884	ENSG00000095637	Umbilical Cord	up_sites	0.0079893	intronic	Alu-SINE
22-36266350	ENSG00000100342	Amnion	up_sites	0.00857476	UTR3	Alu-SINE
14-50327645	ENSG00000100490	Chorion	up_sites	0.0306221	ncRNA_intronic	Alu-SINE
20-45078299	ENSG00000101109	Chorion	up_sites	0.00128217	UTR3	Alu-SINE
20-45848148	ENSG00000101473	Umbilical Cord	up_sites	0.000686042	intronic	Alu-SINE
X-77828331	ENSG00000102158	Amnion	up_sites	0.00131558	UTR3	Alu-SINE
16-31123786	ENSG00000103510	Amnion	up_sites	0.000898021	ncRNA_exonic	Alu-SINE
8-30679089	ENSG00000104687	Chorion	up_sites	0.00189271	UTR3	Alu-SINE
8-47977549	ENSG00000104738	Amnion	up_sites	0.00760193	UTR3	Alu-SINE
19-45393064	ENSG00000104881	Amnion	up_sites	0.00297073	intronic	Alu-SINE
19-45394256	ENSG00000104881	Chorion	up_sites	0.0012097	intronic	Alu-SINE
19-41871486	ENSG00000105372	Chorion	up_sites	0.000175876	UTR3	Alu-SINE
19-41872642	ENSG00000105372	Amnion	up_sites	0.000438362	UTR3	Alu-SINE
19-51518544	ENSG00000105492	Chorion	up_sites	0.00265008	UTR3	Alu-SINE
19-51519052	ENSG00000105492	Chorion	up_sites	0.0211688	UTR3	Alu-SINE
19-51519137	ENSG00000105492	Chorion	up_sites	0.00446746	UTR3	Alu-SINE
7-44832820	ENSG00000105968	Amnion	up_sites	0.0190277	UTR3	Alu-SINE
7-44832874	ENSG00000105968	Amnion	up_sites	0.0138928	UTR3	Alu-SINE
7-44833102	ENSG00000105968	Chorion	up_sites	0.00551788	UTR3	Alu-SINE
7-17344890	ENSG00000106546	Chorion	up_sites	0.00257075	UTR3	Alu-SINE
7-17344903	ENSG00000106546	Chorion	up_sites	0.00839042	UTR3	Alu-SINE
7-17345106	ENSG00000106546	Amnion	up_sites	0.0052282	UTR3	Alu-SINE
7-17345194	ENSG00000106546	Amnion	up_sites	0.00612155	UTR3	Alu-SINE
4-139046593	ENSG00000109381	Chorion	up_sites	0.00841361	downstream	Alu-SINE
11-68756004	ENSG00000110090	Villus of Intermediate	up_sites	0.00957929	UTR3	Alu-SINE
11-68756066	ENSG00000110090	Chorion	up_sites	0.000279391	UTR3	Alu-SINE
5-134901050	ENSG00000113621	Amnion	up_sites	0.00214982	UTR3	Alu-SINE
1-179073347	ENSG00000116199	Amnion	up_sites	0.00235489	UTR3	Alu-SINE
1-179073409	ENSG00000116199	Amnion	up_sites	0.00668894	UTR3	Alu-SINE
1-179073415	ENSG00000116199	Amnion	up_sites	0.00172181	UTR3	Alu-SINE
1-179073416	ENSG00000116199	Amnion	up_sites	0.00411684	UTR3	Alu-SINE
1-179073445	ENSG00000116199	Amnion	up_sites	0.00268406	UTR3	Alu-SINE
1-6223246	ENSG00000116237	Amnion	up_sites	0.00311519	UTR3	Alu-SINE
1-100024500	ENSG00000117620	Amnion	up_sites	0.00152987	UTR3	Alu-SINE
15-80975934	ENSG00000117899	Villus of Intermediate	up_sites	0.00769368	UTR3	Alu-SINE
4-17627754	ENSG00000118579	Umbilical Cord	up_sites	0.0028009	UTR3	Alu-SINE
14-74736301	ENSG00000119616	Amnion	up_sites	0.00206619	UTR3	Alu-SINE
14-74736394	ENSG00000119616	Amnion	up_sites	0.00965515	UTR3	Alu-SINE
2-32310678	ENSG00000119820	Chorion	up_sites	0.000841594	UTR3	Alu-SINE
6-149824694	ENSG00000120256	Amnion	up_sites	0.00183178	ncRNA_intronic	Alu-SINE
9-36215243	ENSG00000122705	Chorion	up_sites	0.00493354	UTR3	Alu-SINE
12-53297204	ENSG00000123349	Chorion	up_sites	0.013029	ncRNA_intronic	Alu-SINE
20-45838643	ENSG00000124104	Umbilical Cord	up_sites	0.00510969	intronic	Alu-SINE
6-43029679	ENSG00000124541	Amnion	up_sites	0.010762	intronic	Alu-SINE
6-43029689	ENSG00000124541	Chorion	up_sites	0.00063083	intronic	Alu-SINE
6-43030496	ENSG00000124541	Villus of Maternal	down_sites	0.00136443	intronic	Alu-SINE
6-43030761	ENSG00000124541	Chorion	up_sites	0.00192633	intronic	Alu-SINE
14-50327645	ENSG00000125375	Chorion	up_sites	0.0306221	ncRNA_intronic	Alu-SINE
14-103682430	ENSG00000126214	Chorion	up_sites	0.0117279	ncRNA_exonic	Alu-SINE
14-55367486	ENSG00000126775	Chorion	up_sites	0.00843284	UTR3	Alu-SINE
1-1318006	ENSG00000127054	Chorion	up_sites	0.0040842	ncRNA_intronic	Alu-SINE
1-19216127	ENSG00000127463	Chorion	up_sites	0.0022819	ncRNA_intronic	Alu-SINE
19-16550468	ENSG00000127526	Chorion	up_sites	0.000771005	UTR3	Alu-SINE
19-16550487	ENSG00000127526	Amnion	up_sites	0.00164155	UTR3	Alu-SINE
17-2417277	ENSG00000127804	Chorion	up_sites	0.0344307	UTR3	Alu-SINE
17-5025699	ENSG00000129250	Amnion	up_sites	0.0122716	UTR3	Alu-SINE
17-5027209	ENSG00000129250	Umbilical Cord	up_sites	0.00821335	UTR3	Alu-SINE
17-5027209	ENSG00000129250	Amnion	up_sites	0.0291825	UTR3	Alu-SINE
17-5027229	ENSG00000129250	Amnion	up_sites	0.00800284	UTR3	Alu-SINE
14-21460751	ENSG00000129472	Amnion	up_sites	0.0014327	UTR3	Alu-SINE
X-54560917	ENSG00000130119	Villus of Intermediate	up_sites	0.00680427	UTR3	Alu-SINE
X-54562226	ENSG00000130119	Umbilical Cord	up_sites	0.00377447	UTR3	Alu-SINE
X-54562243	ENSG00000130119	Chorion	up_sites	0.00362919	UTR3	Alu-SINE
X-54563555	ENSG00000130119	Amnion	up_sites	0.00545762	UTR3	Alu-SINE
X-54564588	ENSG00000130119	Umbilical Cord	up_sites	0.0423028	UTR3	Alu-SINE
19-18368075	ENSG00000130517	Umbilical Cord	up_sites	0.0047958	UTR3	Alu-SINE
9-134792456	ENSG00000130635	Chorion	up_sites	0.0336565	intronic	Alu-SINE
2-128193345	ENSG00000136731	Umbilical Cord	up_sites	0.00114374	UTR3	Alu-SINE
15-51913246	ENSG00000138594	Umbilical Cord	up_sites	0.0109509	UTR3	Alu-SINE
15-51913246	ENSG00000138594	Umbilical Cord	up_sites	0.0109509	UTR3	Alu-SINE
12-53178703	ENSG00000139631	Amnion	up_sites	0.016112	intronic	Alu-SINE
14-91871653	ENSG00000140092	Umbilical Cord	up_sites	0.0113433	intronic	Alu-SINE
15-75349768	ENSG00000140398	Amnion	up_sites	0.0101168	intronic	Alu-SINE
15-75353280	ENSG00000140398	Umbilical Cord	up_sites	0.00241718	intronic	Alu-SINE
16-21640001	ENSG00000140749	Umbilical Cord	Han_sites	-	UTR3	Alu-SINE
19-16550468	ENSG00000141979	Chorion	up_sites	0.000771005	UTR3	Alu-SINE
19-16550487	ENSG00000141979	Amnion	up_sites	0.00164155	UTR3	Alu-SINE
1-225788545	ENSG00000143742	Umbilical Cord	up_sites	0.00601259	intronic	Alu-SINE
2-127844891	ENSG00000144231	Umbilical Cord	up_sites	0.0108072	UTR3	Alu-SINE
3-45680999	ENSG00000144791	Umbilical Cord	up_sites	0.00953995	ncRNA_intronic	Alu-SINE
3-49423494	ENSG00000145029	Amnion	up_sites	0.00832438	UTR3	Alu-SINE
3-49423512	ENSG00000145029	Villus of Maternal	up_sites	0.000433295	UTR3	Alu-SINE
7-156971436	ENSG00000146909	Umbilical Cord	up_sites	0.0106009	UTR3	Alu-SINE
8-97729188	ENSG00000147649	Chorion	up_sites	0.000685673	UTR3	Alu-SINE
11-47168659	ENSG00000149182	Chorion	up_sites	0.00843633	ncRNA_intronic	Alu-SINE
11-108365796	ENSG00000149311	Chorion	up_sites	0.000645233	UTR3	Alu-SINE
20-36781998	ENSG00000149639	Villus of Maternal	up_sites	0.000677826	UTR3	Alu-SINE
20-36782112	ENSG00000149639	Amnion	up_sites	0.00330602	UTR3	Alu-SINE
11-78068663	ENSG00000151366	Chorionic Plate	up_sites	0.00996901	UTR3	Alu-SINE
10-119572450	ENSG00000151923	Villus of Fetal	up_sites	0.00837074	UTR3	Alu-SINE
10-119572555	ENSG00000151923	Umbilical Cord	up_sites	0.00330059	UTR3	Alu-SINE
1-214351213	ENSG00000152104	Amnion	up_sites	0.0019575	ncRNA_intronic	Alu-SINE
2-131513940	ENSG00000152117	Chorionic Plate	up_sites	0.00773251	ncRNA_intronic	Alu-SINE
8-94792377	ENSG00000156162	Amnion	up_sites	0.00611912	ncRNA_intronic	Alu-SINE
17-81248096	ENSG00000157637	Villus of Maternal	up_sites	0.0231478	intronic	Alu-SINE
1-160995524	ENSG00000158769	Chorion	up_sites	0.00325518	UTR3	Alu-SINE
9-36215243	ENSG00000159921	Chorion	up_sites	0.00493354	UTR3	Alu-SINE
1-10457428	ENSG00000160049	Chorion	up_sites	0.00464982	UTR3	Alu-SINE
1-10461069	ENSG00000160049	Umbilical Cord	up_sites	0.0014977	UTR3	Alu-SINE
1-10461105	ENSG00000160049	Umbilical Cord	up_sites	0.000180325	UTR3	Alu-SINE
1-10461143	ENSG00000160049	Amnion	up_sites	0.00154381	UTR3	Alu-SINE
21-42908141	ENSG00000160194	Villus of Fetal	up_sites	0.00053629	intronic	Alu-SINE
21-42911184	ENSG00000160194	Umbilical Cord	up_sites	0.00793466	UTR3	Alu-SINE
21-42911187	ENSG00000160194	Chorionic Plate	down_sites	0.0210128	UTR3	Alu-SINE
19-55039275	ENSG00000160439	Chorion	up_sites	0.000116963	ncRNA_intronic	Alu-SINE
19-55039287	ENSG00000160439	Chorion	up_sites	0.000148943	ncRNA_intronic	Alu-SINE
1-52824087	ENSG00000162378	Chorion	up_sites	0.00701709	UTR3	Alu-SINE
1-9927874	ENSG00000162441	Amnion	up_sites	0.00316602	UTR3	Alu-SINE
1-9928089	ENSG00000162441	Amnion	up_sites	0.000486643	UTR3	Alu-SINE
1-9928201	ENSG00000162441	Amnion	up_sites	0.006668	UTR3	Alu-SINE
2-207755025	ENSG00000163249	Villus of Maternal	up_sites	0.000961425	UTR3	Alu-SINE
2-218235856	ENSG00000163466	Amnion	up_sites	0.0106483	intronic	Alu-SINE
4-39549388	ENSG00000163683	Amnion	up_sites	0.000659363	ncRNA_intronic	Alu-SINE
3-44923681	ENSG00000163812	Amnion	up_sites	0.0188903	UTR3	Alu-SINE
3-44923687	ENSG00000163812	Amnion	up_sites	0.0199452	UTR3	Alu-SINE
3-184363953	ENSG00000163882	Amnion	up_sites	0.000427711	intronic	Alu-SINE
8-11842864	ENSG00000164733	Chorion	up_sites	0.0337062	UTR3	Alu-SINE
8-11843176	ENSG00000164733	Amnion	up_sites	0.0152704	UTR3	Alu-SINE
11-93735478	ENSG00000166012	Chorion	up_sites	0.0248627	intronic	Alu-SINE
10-72235263	ENSG00000166295	Chorion	up_sites	0.00163952	UTR3	Alu-SINE
11-108365796	ENSG00000166323	Chorion	up_sites	0.000645233	UTR3	Alu-SINE
11-8686293	ENSG00000166441	Amnion	up_sites	0.0111764	UTR3	Alu-SINE
16-75445412	ENSG00000166822	Umbilical Cord	up_sites	0.00191458	UTR3	Alu-SINE
16-75446075	ENSG00000166822	Umbilical Cord	up_sites	0.00444749	UTR3	Alu-SINE
9-128331105	ENSG00000167113	Chorion	up_sites	0.0196779	intronic	Alu-SINE
19-16080628	ENSG00000167460	Chorion	up_sites	0.0107069	intronic	Alu-SINE
19-16080692	ENSG00000167460	Chorion	up_sites	0.000208866	intronic	Alu-SINE
19-35770266	ENSG00000167595	Chorion	up_sites	0.0011561	ncRNA_intronic	Alu-SINE
19-35770769	ENSG00000167595	Chorion	up_sites	0.0279325	ncRNA_exonic	Alu-SINE
19-52647541	ENSG00000167766	Chorion	up_sites	0.00131078	intronic	Alu-SINE
8-43021749	ENSG00000168172	Umbilical Cord	up_sites	0.00387129	UTR3	Alu-SINE
8-42533516	ENSG00000168575	Umbilical Cord	up_sites	0.00400928	intronic	Alu-SINE
13-114284241	ENSG00000169062	Amnion	up_sites	0.0103197	intronic	Alu-SINE
5-131202443	ENSG00000169567	Amnion	up_sites	0.0011203	UTR3	Alu-SINE
11-31431203	ENSG00000170946	Chorion	up_sites	0.00141722	UTR3	Alu-SINE
16-11835319	ENSG00000171490	Amnion	up_sites	0.030032	UTR3	Alu-SINE
6-111271682	ENSG00000173214	Chorionic Plate	down_sites	0.000156355	UTR3	Alu-SINE
12-117029775	ENSG00000174989	Villus of Maternal	up_sites	0.00307157	UTR3	Alu-SINE
1-201998410	ENSG00000176393	Villus of Intermediate	up_sites	0.00251002	ncRNA_exonic	Alu-SINE
11-768347	ENSG00000177225	Chorionic Plate	up_sites	0.00385501	UTR3	Alu-SINE
11-768393	ENSG00000177225	Umbilical Cord	up_sites	0.0196149	UTR3	Alu-SINE
10-49973474	ENSG00000178440	Chorion	up_sites	0.00531579	UTR3	Alu-SINE
14-55367486	ENSG00000178974	Chorion	up_sites	0.00843284	UTR3	Alu-SINE
6-26095240	ENSG00000180596	Chorion	up_sites	0.0016761	UTR3	Alu-SINE
6-26095414	ENSG00000180596	Umbilical Cord	up_sites	0.00428807	UTR3	Alu-SINE
6-26096395	ENSG00000180596	Chorion	up_sites	0.006627	UTR3	Alu-SINE
21-41174281	ENSG00000182240	Villus of Maternal	up_sites	0.0356591	intronic	Alu-SINE
X-280088	ENSG00000182378	Villus of Intermediate	up_sites	0.00441894	intronic	Alu-SINE
1-25867175	ENSG00000182749	Villus of Intermediate	up_sites	0.00214107	intronic	Alu-SINE
9-116236399	ENSG00000182752	Chorionic Plate	up_sites	0.00659062	intronic	Alu-SINE
3-197885349	ENSG00000186001	Amnion	up_sites	0.0027912	UTR3	Alu-SINE
5-131202443	ENSG00000186687	Amnion	up_sites	0.0011203	UTR3	Alu-SINE
18-35247800	ENSG00000186812	Chorion	up_sites	3.0505e-05	UTR3	Alu-SINE
16-21640001	ENSG00000197006	Umbilical Cord	Han_sites	-	UTR3	Alu-SINE
2-216502145	ENSG00000197756	Chorion	up_sites	0.00617179	UTR3	Alu-SINE
2-216502196	ENSG00000197756	Amnion	up_sites	0.000590266	UTR3	Alu-SINE
2-216502206	ENSG00000197756	Amnion	up_sites	0.00103859	UTR3	Alu-SINE
2-216502207	ENSG00000197756	Amnion	up_sites	0.00369758	UTR3	Alu-SINE
12-43787936	ENSG00000198001	Chorion	up_sites	0.00147704	UTR3	Alu-SINE
12-43788679	ENSG00000198001	Umbilical Cord	up_sites	0.0126273	UTR3	Alu-SINE
10-101789264	ENSG00000198408	Chorion	up_sites	0.00404347	intronic	Alu-SINE
10-49973474	ENSG00000204152	Chorion	up_sites	0.00531579	UTR3	Alu-SINE
1-145921979	ENSG00000211451	Amnion	up_sites	0.000269607	ncRNA_intronic	Alu-SINE
19-58584082	ENSG00000213753	Amnion	up_sites	0.000169144	ncRNA_exonic	Alu-SINE
19-58584082	ENSG00000213753	Amnion	up_sites	0.000169144	ncRNA_exonic	Alu-SINE
19-58584115	ENSG00000213753	Amnion	up_sites	0.00233222	ncRNA_exonic	Alu-SINE
19-58584115	ENSG00000213753	Amnion	up_sites	0.00233222	ncRNA_exonic	Alu-SINE
19-58584206	ENSG00000213753	Amnion	up_sites	0.00210373	ncRNA_exonic	Alu-SINE
19-58584206	ENSG00000213753	Amnion	up_sites	0.00210373	ncRNA_exonic	Alu-SINE
16-10531456	ENSG00000213853	Chorion	up_sites	9.32403e-06	ncRNA_intronic	Alu-SINE
16-10531468	ENSG00000213853	Chorion	up_sites	0.00852791	ncRNA_intronic	Alu-SINE
19-16634605	ENSG00000214046	Umbilical Cord	up_sites	0.0140153	ncRNA_exonic	Alu-SINE
19-16641691	ENSG00000214046	Umbilical Cord	up_sites	0.000364013	ncRNA_intronic	Alu-SINE
10-87208355	ENSG00000223482	Umbilical Cord	up_sites	0.0316157	ncRNA_exonic	Alu-SINE
3-14944603	ENSG00000225733	Amnion	up_sites	0.00227783	ncRNA_exonic	Alu-SINE
1-214351213	ENSG00000228470	Amnion	up_sites	0.0019575	ncRNA_intronic	Alu-SINE
5-80627542	ENSG00000228716	Umbilical Cord	up_sites	0.000990631	UTR3	Alu-SINE
1-19216127	ENSG00000230424	Chorion	up_sites	0.0022819	ncRNA_intronic	Alu-SINE
3-45680999	ENSG00000230530	Umbilical Cord	up_sites	0.00953995	ncRNA_intronic	Alu-SINE
X-74276500	ENSG00000230590	Villus of Intermediate	up_sites	0.00880894	ncRNA_intronic	Alu-SINE
2-27357380	ENSG00000234072	Villus of Intermediate	up_sites	0.00194397	ncRNA_intronic	Alu-SINE
1-201998410	ENSG00000234678	Villus of Intermediate	up_sites	0.00251002	ncRNA_exonic	Alu-SINE
6-31672643	ENSG00000240053	Chorionic Plate	up_sites	0.00258285	UTR3	Alu-SINE
1-1318006	ENSG00000240731	Chorion	up_sites	0.0040842	ncRNA_intronic	Alu-SINE
7-128462188	ENSG00000240758	Amnion	down_sites	0.0219974	ncRNA_intronic	Alu-SINE
22-39019906	ENSG00000244509	Villus of Maternal	up_sites	0.000667476	UTR3	Alu-SINE
15-40692803	ENSG00000245849	Villus of Maternal	up_sites	0.0191957	ncRNA_intronic	Alu-SINE
14-103682430	ENSG00000246451	Chorion	up_sites	0.0117279	ncRNA_exonic	Alu-SINE
12-132721837	ENSG00000247077	Umbilical Cord	up_sites	0.00518037	UTR3	Alu-SINE
4-39549388	ENSG00000249348	Amnion	up_sites	0.000659363	ncRNA_intronic	Alu-SINE
8-94792377	ENSG00000254307	Amnion	up_sites	0.00611912	ncRNA_intronic	Alu-SINE
8-43021749	ENSG00000254673	Umbilical Cord	up_sites	0.00387129	UTR3	Alu-SINE
16-10531456	ENSG00000256013	Chorion	up_sites	9.32403e-06	ncRNA_intronic	Alu-SINE
16-10531468	ENSG00000256013	Chorion	up_sites	0.00852791	ncRNA_intronic	Alu-SINE
14-103682430	ENSG00000256500	Chorion	up_sites	0.0117279	ncRNA_exonic	Alu-SINE
14-50327645	ENSG00000259071	Chorion	up_sites	0.0306221	ncRNA_intronic	Alu-SINE
11-78068663	ENSG00000259112	Chorionic Plate	up_sites	0.00996901	UTR3	Alu-SINE
16-75445412	ENSG00000261717	Umbilical Cord	up_sites	0.00191458	UTR3	Alu-SINE
16-75446075	ENSG00000261717	Umbilical Cord	up_sites	0.00444749	UTR3	Alu-SINE
16-14326917	ENSG00000262454	Chorion	up_sites	0.0212241	ncRNA_exonic	Alu-SINE
16-14327046	ENSG00000262454	Umbilical Cord	up_sites	0.00128773	ncRNA_exonic	Alu-SINE
6-31672643	ENSG00000263020	Chorionic Plate	up_sites	0.00258285	UTR3	Alu-SINE
1-145921979	ENSG00000265241	Amnion	up_sites	0.000269607	ncRNA_intronic	Alu-SINE
17-68424794	ENSG00000267009	Villus of Intermediate	up_sites	0.00441932	ncRNA_intronic	Alu-SINE
19-35770266	ENSG00000267049	Chorion	up_sites	0.0011561	ncRNA_intronic	Alu-SINE
19-35770769	ENSG00000267049	Chorion	up_sites	0.0279325	ncRNA_exonic	Alu-SINE
19-55039275	ENSG00000267149	Chorion	up_sites	0.000116963	ncRNA_intronic	Alu-SINE
19-55039287	ENSG00000267149	Chorion	up_sites	0.000148943	ncRNA_intronic	Alu-SINE
19-55039275	ENSG00000267265	Chorion	up_sites	0.000116963	ncRNA_intronic	Alu-SINE
19-55039287	ENSG00000267265	Chorion	up_sites	0.000148943	ncRNA_intronic	Alu-SINE
19-5910966	ENSG00000267314	Villus of Intermediate	up_sites	0.0136338	intronic	Alu-SINE
19-16634605	ENSG00000268087	Umbilical Cord	up_sites	0.0140153	ncRNA_exonic	Alu-SINE
19-16634605	ENSG00000268790	Umbilical Cord	up_sites	0.0140153	ncRNA_exonic	Alu-SINE
19-16641691	ENSG00000268790	Umbilical Cord	up_sites	0.000364013	ncRNA_intronic	Alu-SINE
19-16634605	ENSG00000269044	Umbilical Cord	up_sites	0.0140153	ncRNA_exonic	Alu-SINE
19-16634605	ENSG00000269427	Umbilical Cord	up_sites	0.0140153	ncRNA_exonic	Alu-SINE
19-16641691	ENSG00000269427	Umbilical Cord	up_sites	0.000364013	ncRNA_intronic	Alu-SINE
11-47168659	ENSG00000270060	Chorion	up_sites	0.00843633	ncRNA_intronic	Alu-SINE
7-128462188	ENSG00000273184	Amnion	down_sites	0.0219974	ncRNA_intronic	Alu-SINE
7-128470090	ENSG00000273184	Amnion	down_sites	0.00584624	ncRNA_intronic	Alu-SINE
17-37515696	ENSG00000275066	Chorion	up_sites	0.00123126	UTR3	Alu-SINE
17-37516985	ENSG00000275066	Chorion	up_sites	0.0207852	UTR3	Alu-SINE
17-37517042	ENSG00000275066	Chorion	up_sites	0.00312709	UTR3	Alu-SINE
16-31123786	ENSG00000278133	Amnion	up_sites	0.000898021	ncRNA_exonic	Alu-SINE
3-49423494	ENSG00000283189	Amnion	up_sites	0.00832438	UTR3	Alu-SINE
3-49423512	ENSG00000283189	Villus of Maternal	up_sites	0.000433295	UTR3	Alu-SINE
7-17344890	ENSG00000283321	Chorion	up_sites	0.00257075	UTR3	Alu-SINE
7-17344903	ENSG00000283321	Chorion	up_sites	0.00839042	UTR3	Alu-SINE
7-17345106	ENSG00000283321	Amnion	up_sites	0.0052282	UTR3	Alu-SINE
7-17345194	ENSG00000283321	Amnion	up_sites	0.00612155	UTR3	Alu-SINE
1-100024500	ENSG00000283761	Amnion	up_sites	0.00152987	UTR3	Alu-SINE
22-39019906	ENSG00000284554	Villus of Maternal	up_sites	0.000667476	UTR3	Alu-SINE
1-153605594	ENSG00000285867	Amnion	up_sites	0.0110307	ncRNA_intronic	Alu-SINE
6-149824694	ENSG00000285889	Amnion	up_sites	0.00183178	ncRNA_intronic	Alu-SINE
6-149824694	ENSG00000285991	Amnion	up_sites	0.00183178	ncRNA_intronic	Alu-SINE
19-58584082	ENSG00000286104	Amnion	up_sites	0.000169144	ncRNA_exonic	Alu-SINE
19-58584115	ENSG00000286104	Amnion	up_sites	0.00233222	ncRNA_exonic	Alu-SINE
19-58584206	ENSG00000286104	Amnion	up_sites	0.00210373	ncRNA_exonic	Alu-SINE
12-7964053	ENSG00000288043	Chorion	up_sites	0.014119	ncRNA_intronic	Alu-SINE
12-7964078	ENSG00000288043	Chorion	up_sites	0.00936515	ncRNA_intronic	Alu-SINE
12-7964147	ENSG00000288043	Chorion	up_sites	0.0076181	ncRNA_intronic	Alu-SINE
12-7970468	ENSG00000288043	Chorion	up_sites	0.00105087	ncRNA_intronic	Alu-SINE
12-7970530	ENSG00000288043	Chorion	up_sites	0.00247002	ncRNA_intronic	Alu-SINE
12-53297204	ENSG00000288663	Chorion	up_sites	0.013029	ncRNA_intronic	Alu-SINE
1-145921979	ENSG00000289565	Amnion	up_sites	0.000269607	ncRNA_intronic	Alu-SINE
7-65722954	ENSG00000290926	Umbilical Cord	up_sites	0.00162441	ncRNA_intronic	Alu-SINE

## Sheet: 2
Supplementary table 2. Differential RNA editing sites in the placentas of male infants
RNA editing sites	Gene	Tissues	Sex	Diff_type	P value	Gene regions	Repeated sequence
1-52824014	ENSG00000162378_ZYG11B	Chorion	Male	up_sites	0.0368797	UTR3	Alu-SINE
1-52824014	ENSG00000162378_ZYG11B	Umbilical Cord	Male	up_sites	0.0320171	UTR3	Alu-SINE
1-52825748	ENSG00000162378_ZYG11B	Chorionic Plate	Male	down_sites	0.0189777	UTR3	Alu-SINE
1-52825753	ENSG00000162378_ZYG11B	Villus of Intermediate	Male	up_sites	0.0249315	UTR3	Alu-SINE
5-112891790	ENSG00000212643_ZRSR2P1	Villus of Fetal	Male	down_sites	0.0246105	ncRNA_exonic	-
19-52064706	ENSG00000197608_ZNF841	Umbilical Cord	Male	up_sites	0.0116739	UTR3	Alu-SINE
19-52064730	ENSG00000197608_ZNF841	Umbilical Cord	Male	up_sites	0.0333318	UTR3	Alu-SINE
19-52064762	ENSG00000197608_ZNF841	Umbilical Cord	Male	up_sites	0.0246638	UTR3	Alu-SINE
19-52064837	ENSG00000197608_ZNF841	Villus of Intermediate	Male	up_sites	0.0184705	UTR3	Alu-SINE
19-52618252	ENSG00000167766_ZNF83	Amnion	Male	up_sites	0.0122447	ncRNA_intronic	Alu-SINE
19-52646078	ENSG00000167766_ZNF83	Chorion	Male	Han_sites	-	intronic	Alu-SINE
19-52646167	ENSG00000167766_ZNF83	Villus of Maternal	Male	down_sites	0.0269436	intronic	Alu-SINE
19-52647541	ENSG00000167766_ZNF83	Chorion	Male	up_sites	0.00140658	intronic	Alu-SINE
19-57860381	ENSG00000204514_ZNF814	Chorion	Male	up_sites	0.000410212	UTR3	Alu-SINE
19-57860381	ENSG00000204514_ZNF814	Umbilical Cord	Male	down_sites	0.013669	UTR3	Alu-SINE
19-57863954	ENSG00000204514_ZNF814	Chorion	Male	up_sites	0.00920202	UTR3	Alu-SINE
19-21292170	ENSG00000182141_ZNF708	Chorion	Male	up_sites	0.001541	UTR3	Alu-SINE
19-53012380	ENSG00000242779_ZNF702P	Villus of Maternal	Male	Han_sites	-	ncRNA_exonic	Alu-SINE
7-99568441	ENSG00000197343_ZNF655	Villus of Fetal	Male	up_sites	0.0431948	intronic	Alu-SINE
3-40536194	ENSG00000172888_ZNF621	Villus of Maternal	Male	up_sites	0.0234453	UTR3	Alu-SINE
3-40537506	ENSG00000172888_ZNF621	Amnion	Male	up_sites	0.00326512	UTR3	Alu-SINE
19-57844380	ENSG00000269343_ZNF587B	Chorion	Male	Han_sites	-	UTR3	Alu-SINE
19-57860381	ENSG00000198466_ZNF587	Chorion	Male	up_sites	0.000410212	UTR3	Alu-SINE
19-57860381	ENSG00000198466_ZNF587	Umbilical Cord	Male	down_sites	0.013669	UTR3	Alu-SINE
19-57863954	ENSG00000198466_ZNF587	Chorion	Male	up_sites	0.00920202	UTR3	Alu-SINE
19-57787421	ENSG00000083828_ZNF586	Villus of Maternal	Male	up_sites	0.0308326	intronic	Alu-SINE
19-56379238	ENSG00000018869_ZNF582	Villus of Intermediate	Male	down_sites	0.0436058	ncRNA_exonic	Alu-SINE
19-56379334	ENSG00000018869_ZNF582	Chorion	Male	up_sites	0.0388753	ncRNA_exonic	Alu-SINE
19-56379406	ENSG00000018869_ZNF582	Umbilical Cord	Male	up_sites	0.00569129	ncRNA_exonic	Alu-SINE
19-37792481	ENSG00000189144_ZNF573	Villus of Fetal	Male	up_sites	0.0169284	ncRNA_exonic	-
19-37792481	ENSG00000189144_ZNF573	Villus of Maternal	Male	up_sites	0.0358441	ncRNA_exonic	-
19-2835880	ENSG00000172006_ZNF554	Villus of Intermediate	Male	Tibetan_sites	-	UTR3	Alu-SINE
16-4750617	ENSG00000103199_ZNF500	Umbilical Cord	Male	up_sites	0.00846158	ncRNA_intronic	Alu-SINE
19-52064706	ENSG00000256087_ZNF432	Umbilical Cord	Male	up_sites	0.0116739	UTR3	Alu-SINE
19-52064730	ENSG00000256087_ZNF432	Umbilical Cord	Male	up_sites	0.0333318	UTR3	Alu-SINE
19-52064762	ENSG00000256087_ZNF432	Umbilical Cord	Male	up_sites	0.0246638	UTR3	Alu-SINE
19-52064837	ENSG00000256087_ZNF432	Villus of Intermediate	Male	up_sites	0.0184705	UTR3	Alu-SINE
19-21184300	ENSG00000196705_ZNF431	Umbilical Cord	Male	up_sites	0.0222347	UTR3	Alu-SINE
19-21185663	ENSG00000196705_ZNF431	Amnion	Male	up_sites	0.0454776	UTR3	Alu-SINE
19-57907125	ENSG00000173480_ZNF417	Chorionic Plate	Male	up_sites	0.0484619	UTR3	Alu-SINE
18-35247800	ENSG00000186812_ZNF397	Chorion	Male	up_sites	0.00776324	UTR3	Alu-SINE
18-35248659	ENSG00000186812_ZNF397	Villus of Maternal	Male	up_sites	0.0209454	UTR3	Alu-SINE
5-179082611	ENSG00000177932_ZNF354C	Villus of Intermediate	Male	up_sites	0.0210371	UTR3	-
5-179082611	ENSG00000177932_ZNF354C	Villus of Maternal	Male	up_sites	0.0266466	UTR3	-
19-58126774	ENSG00000181894_ZNF329	Umbilical Cord	Male	up_sites	0.00215379	UTR3	Alu-SINE
19-52878858	ENSG00000182986_ZNF320	Chorion	Male	up_sites	0.00531187	UTR3	Alu-SINE
19-52880159	ENSG00000182986_ZNF320	Umbilical Cord	Male	up_sites	0.00832963	UTR3	Alu-SINE
19-52895689	ENSG00000182986_ZNF320	Villus of Intermediate	Male	down_sites	0.0367991	intronic	Alu-SINE
3-44923208	ENSG00000163812_ZDHHC3	Amnion	Male	up_sites	0.0123683	UTR3	Alu-SINE
3-44923687	ENSG00000163812_ZDHHC3	Amnion	Male	up_sites	0.0266466	UTR3	Alu-SINE
13-21374916	ENSG00000180776_ZDHHC20	Amnion	Male	up_sites	0.0199935	UTR3	Alu-SINE
13-21374968	ENSG00000180776_ZDHHC20	Amnion	Male	up_sites	0.00636764	UTR3	Alu-SINE
X-123912749	ENSG00000101966_XIAP	Amnion	Male	up_sites	0.00733147	UTR3	Alu-SINE
17-27297691	ENSG00000109046_WSB1	Amnion	Male	up_sites	0.0417313	intronic	Alu-SINE
17-68424794	ENSG00000070540_WIPI1	Villus of Intermediate	Male	up_sites	0.0155247	ncRNA_intronic	Alu-SINE
19-12671434	ENSG00000123154_WDR83	Villus of Intermediate	Male	down_sites	0.00927133	UTR3	Alu-SINE
15-84642257	ENSG00000177082_WDR73	Amnion	Male	up_sites	0.0204512	ncRNA_exonic	Alu-SINE
17-82626021	ENSG00000141580_WDR45B	Amnion	Male	Han_sites	-	intronic	Alu-SINE
17-82628060	ENSG00000141580_WDR45B	Villus of Fetal	Male	up_sites	0.0365809	intronic	Alu-SINE
14-100366778	ENSG00000140105_WARS1	Chorionic Plate	Male	Han_sites	-	ncRNA_exonic	-
7-38723531	ENSG00000006715_VPS41	Umbilical Cord	Male	up_sites	0.0253155	UTR3	Alu-SINE
7-38724705	ENSG00000006715_VPS41	Umbilical Cord	Male	up_sites	0.00485978	UTR3	Alu-SINE
7-38724758	ENSG00000006715_VPS41	Chorionic Plate	Male	up_sites	0.0144092	UTR3	Alu-SINE
12-110497661	ENSG00000111237_VPS29	Chorion	Male	up_sites	0.0274614	intronic	Alu-SINE
12-110498247	ENSG00000111237_VPS29	Villus of Intermediate	Male	Han_sites	-	intronic	Alu-SINE
3-10151132	ENSG00000134086_VHL	Umbilical Cord	Male	up_sites	0.0247145	ncRNA_intronic	Alu-SINE
3-10152113	ENSG00000134086_VHL	Villus of Fetal	Male	Tibetan_sites	-	ncRNA_intronic	Alu-SINE
3-10152632	ENSG00000134086_VHL	Chorionic Plate	Male	down_sites	0.032879	ncRNA_intronic	Alu-SINE
3-86941796	ENSG00000206538_VGLL3	Villus of Maternal	Male	Han_sites	-	UTR3	-
13-52030810	ENSG00000253797_UTP14C	Umbilical Cord	Male	down_sites	0.037418	non-synonymous	-
2-85609818	ENSG00000168883_USP39	Umbilical Cord	Male	up_sites	0.0029546	intronic	Alu-SINE
2-85609819	ENSG00000168883_USP39	Umbilical Cord	Male	up_sites	0.00406204	intronic	Alu-SINE
7-48104146	ENSG00000183696_UPP1	Chorion	Male	down_sites	0.00284348	intronic	Alu-SINE
7-48106494	ENSG00000183696_UPP1	Chorion	Male	down_sites	0.00376976	intronic	Alu-SINE
7-48106508	ENSG00000183696_UPP1	Chorion	Male	down_sites	0.0137398	intronic	Alu-SINE
7-48106573	ENSG00000183696_UPP1	Chorion	Male	down_sites	0.0112641	intronic	Alu-SINE
13-114284122	ENSG00000169062_UPF3A	Villus of Fetal	Male	up_sites	0.0116654	intronic	Alu-SINE
2-128191581	ENSG00000136731_UGGT1	Chorion	Male	Han_sites	-	UTR3	Alu-SINE
2-128192917	ENSG00000136731_UGGT1	Amnion	Male	up_sites	0.00691773	UTR3	Alu-SINE
2-128192941	ENSG00000136731_UGGT1	Amnion	Male	up_sites	0.0122833	UTR3	Alu-SINE
2-128193345	ENSG00000136731_UGGT1	Umbilical Cord	Male	up_sites	0.000674376	UTR3	Alu-SINE
2-128193345	ENSG00000136731_UGGT1	Villus of Maternal	Male	up_sites	0.0096428	UTR3	Alu-SINE
2-128193346	ENSG00000136731_UGGT1	Umbilical Cord	Male	up_sites	0.00368827	UTR3	Alu-SINE
2-128193549	ENSG00000136731_UGGT1	Villus of Intermediate	Male	up_sites	0.00141402	UTR3	Alu-SINE
2-128194506	ENSG00000136731_UGGT1	Chorion	Male	up_sites	0.0091262	UTR3	Alu-SINE
4-39533027	ENSG00000249348_UGDH-AS1	Chorionic Plate	Male	down_sites	0.00996979	ncRNA_intronic	Alu-SINE
4-39549358	ENSG00000249348_UGDH-AS1	Amnion	Male	up_sites	0.039795	ncRNA_intronic	Alu-SINE
4-39549388	ENSG00000249348_UGDH-AS1	Amnion	Male	up_sites	0.00114935	ncRNA_intronic	Alu-SINE
4-39549547	ENSG00000249348_UGDH-AS1	Chorionic Plate	Male	up_sites	0.0139013	ncRNA_intronic	Alu-SINE
4-39549559	ENSG00000249348_UGDH-AS1	Amnion	Male	up_sites	0.0186384	ncRNA_intronic	Alu-SINE
X-119538510	ENSG00000077721_UBE2A	Umbilical Cord	Male	up_sites	0.000320802	UTR3	Alu-SINE
X-119538562	ENSG00000077721_UBE2A	Chorion	Male	up_sites	0.0112592	UTR3	Alu-SINE
19-10352210	ENSG00000105397_TYK2	Umbilical Cord	Male	up_sites	0.022643	intronic	Alu-SINE
5-134900439	ENSG00000113621_TXNDC15	Amnion	Male	up_sites	0.0250298	UTR3	Alu-SINE
5-134900905	ENSG00000113621_TXNDC15	Villus of Maternal	Male	up_sites	0.0198032	UTR3	Alu-SINE
5-134901040	ENSG00000113621_TXNDC15	Amnion	Male	up_sites	0.0249982	UTR3	Alu-SINE
5-134901050	ENSG00000113621_TXNDC15	Amnion	Male	up_sites	0.0222393	UTR3	Alu-SINE
18-12322181	ENSG00000176014_TUBB6	Amnion	Male	up_sites	0.0401636	intronic	Alu-SINE
11-62739891	ENSG00000162222_TTC9C	Chorion	Male	Han_sites	-	intronic	Alu-SINE
19-12732037	ENSG00000123144_TRIR	Villus of Maternal	Male	up_sites	0.0383038	intronic	Alu-SINE
19-12732692	ENSG00000123144_TRIR	Villus of Intermediate	Male	up_sites	0.00895699	intronic	Alu-SINE
15-44733160	ENSG00000185880_TRIM69	Chorion	Male	up_sites	0.0370999	intronic	Alu-SINE
17-75890131	ENSG00000141569_TRIM65	Umbilical Cord	Male	up_sites	0.013078	UTR3	Alu-SINE
17-75890171	ENSG00000141569_TRIM65	Umbilical Cord	Male	up_sites	0.00152896	UTR3	Alu-SINE
16-3678734	ENSG00000126602_TRAP1	Chorion	Male	up_sites	0.0279526	intronic	Alu-SINE
1-179860449	ENSG00000169905_TOR1AIP2	Villus of Fetal	Male	up_sites	0.0210489	UTR3	Alu-SINE
15-51913043	ENSG00000138594_TMOD3	Amnion	Male	up_sites	0.0102455	UTR3	Alu-SINE
15-51913099	ENSG00000138594_TMOD3	Amnion	Male	up_sites	0.0260723	UTR3	Alu-SINE
15-51913158	ENSG00000138594_TMOD3	Chorion	Male	up_sites	0.0325331	UTR3	Alu-SINE
15-51913234	ENSG00000138594_TMOD3	Villus of Fetal	Male	up_sites	0.0375267	UTR3	Alu-SINE
15-51913892	ENSG00000138594_TMOD3	Amnion	Male	up_sites	0.00229678	UTR3	Alu-SINE
15-51914493	ENSG00000138594_TMOD3	Villus of Intermediate	Male	up_sites	0.0184827	UTR3	Alu-SINE
11-8975599	ENSG00000254860_TMEM9B-AS1	Amnion	Male	up_sites	0.0173433	ncRNA_intronic	Alu-SINE
18-23296358	ENSG00000134490_TMEM241	Chorion	Male	up_sites	0.00433437	UTR3	Alu-SINE
12-55834507	ENSG00000182796_TMEM198B	Chorion	Male	up_sites	0.0456708	ncRNA_intronic	Alu-SINE
4-165078996	ENSG00000170088_TMEM192	Chorion	Male	up_sites	0.000839441	UTR3	Alu-SINE
12-71702538	ENSG00000139291_TMEM19	Umbilical Cord	Male	up_sites	0.0119671	UTR3	Alu-SINE
16-75445426	ENSG00000166822_TMEM170A	Umbilical Cord	Male	up_sites	0.0288635	UTR3	Alu-SINE
16-75445572	ENSG00000166822_TMEM170A	Chorionic Plate	Male	up_sites	0.0129972	UTR3	Alu-SINE
16-75445576	ENSG00000166822_TMEM170A	Amnion	Male	up_sites	0.0059213	UTR3	Alu-SINE
16-75446075	ENSG00000166822_TMEM170A	Umbilical Cord	Male	up_sites	0.0219507	UTR3	Alu-SINE
17-1703540	ENSG00000185561_TLCD2	Chorion	Male	Han_sites	-	UTR3	Alu-SINE
17-1703540	ENSG00000185561_TLCD2	Villus of Intermediate	Male	Han_sites	-	UTR3	Alu-SINE
11-126295135	ENSG00000150455_TIRAP	Villus of Maternal	Male	up_sites	0.0207205	ncRNA_intronic	Alu-SINE
22-32861081	ENSG00000100234_TIMP3	Chorionic Plate	Male	Han_sites	-	UTR3	-
10-119572450	ENSG00000151923_TIAL1	Villus of Fetal	Male	up_sites	0.0454049	UTR3	Alu-SINE
10-119572457	ENSG00000151923_TIAL1	Villus of Fetal	Male	up_sites	0.0136239	UTR3	Alu-SINE
10-119572607	ENSG00000151923_TIAL1	Chorionic Plate	Male	up_sites	0.0221373	UTR3	Alu-SINE
1-155203900	ENSG00000231064_THBS3-AS1	Amnion	Male	up_sites	0.000478026	ncRNA_intronic	Alu-SINE
1-155203982	ENSG00000231064_THBS3-AS1	Amnion	Male	up_sites	0.0440594	ncRNA_intronic	Alu-SINE
1-155203900	ENSG00000169231_THBS3	Amnion	Male	up_sites	0.000478026	ncRNA_intronic	Alu-SINE
1-155203982	ENSG00000169231_THBS3	Amnion	Male	up_sites	0.0440594	ncRNA_intronic	Alu-SINE
2-85323098	ENSG00000152291_TGOLN2	Villus of Maternal	Male	down_sites	0.00720162	intronic	Alu-SINE
2-85323374	ENSG00000152291_TGOLN2	Chorion	Male	Han_sites	-	intronic	Alu-SINE
X-49035197	ENSG00000068323_TFE3	Villus of Fetal	Male	down_sites	0.00824178	intronic	Alu-SINE
3-141946916	ENSG00000114126_TFDP2	Chorionic Plate	Male	up_sites	0.036422	UTR3	Alu-SINE
3-141948915	ENSG00000114126_TFDP2	Villus of Intermediate	Male	up_sites	0.0285341	UTR3	Alu-SINE
3-141949989	ENSG00000114126_TFDP2	Villus of Intermediate	Male	up_sites	0.0372776	UTR3	Alu-SINE
14-20367107	ENSG00000129566_TEP1	Chorionic Plate	Male	up_sites	0.0246416	UTR3	Alu-SINE
14-20367181	ENSG00000129566_TEP1	Chorionic Plate	Male	up_sites	0.00386233	UTR3	Alu-SINE
14-20367747	ENSG00000129566_TEP1	Villus of Maternal	Male	up_sites	0.0474116	UTR3	Alu-SINE
14-20367769	ENSG00000129566_TEP1	Umbilical Cord	Male	up_sites	0.0150902	UTR3	Alu-SINE
19-3540176	ENSG00000183397_TEKTIP1	Chorion	Male	up_sites	0.00611448	intronic	Alu-SINE
19-3541021	ENSG00000183397_TEKTIP1	Chorion	Male	up_sites	0.0204472	intronic	Alu-SINE
1-23381148	ENSG00000204219_TCEA3	Amnion	Male	up_sites	0.0127591	UTR3	Alu-SINE
1-11020869	ENSG00000120948_TARDBP	Villus of Intermediate	Male	up_sites	0.0145606	intronic	Alu-SINE
1-11021885	ENSG00000120948_TARDBP	Villus of Intermediate	Male	up_sites	0.0167506	intronic	Alu-SINE
22-20065403	ENSG00000183597_TANGO2	Umbilical Cord	Male	up_sites	0.00609149	ncRNA_intronic	Alu-SINE
6-42079688	ENSG00000137413_TAF8	Chorionic Plate	Male	up_sites	0.0304133	UTR3	Alu-SINE
17-35827293	ENSG00000270647_TAF15	Chorionic Plate	Male	up_sites	0.02677	ncRNA_intronic	Alu-SINE
17-37477732	ENSG00000276234_TADA2A	Umbilical Cord	Male	up_sites	0.0394109	UTR3	Alu-SINE
X-30836660	ENSG00000157625_TAB3	Villus of Fetal	Male	down_sites	0.032348	UTR3	Alu-SINE
1-27344323	ENSG00000142765_SYTL1	Amnion	Male	up_sites	0.0163165	intronic	Alu-SINE
17-37515696	ENSG00000275066_SYNRG	Chorion	Male	up_sites	0.0221501	UTR3	Alu-SINE
17-37517003	ENSG00000275066_SYNRG	Chorion	Male	up_sites	0.00869647	UTR3	Alu-SINE
17-37517052	ENSG00000275066_SYNRG	Chorionic Plate	Male	up_sites	0.0468389	UTR3	Alu-SINE
14-70369354	ENSG00000258644_SYNJ2BP-COX16	Amnion	Male	up_sites	0.00680129	UTR3	Alu-SINE
14-70369354	ENSG00000213463_SYNJ2BP	Amnion	Male	up_sites	0.00680129	UTR3	Alu-SINE
22-32861081	ENSG00000185666_SYN3	Chorionic Plate	Male	Han_sites	-	UTR3	-
X-16763192	ENSG00000169895_SYAP1	Chorion	Male	Han_sites	-	UTR3	Alu-SINE
X-16764055	ENSG00000169895_SYAP1	Chorion	Male	Han_sites	-	UTR3	Alu-SINE
10-29460860	ENSG00000197321_SVIL	Villus of Intermediate	Male	up_sites	0.0478115	ncRNA_exonic	Alu-SINE
16-31040913	ENSG00000103496_STX4	Amnion	Male	up_sites	0.00315335	downstream	Alu-SINE
16-31041744	ENSG00000103496_STX4	Chorionic Plate	Male	up_sites	0.0484976	intergenic	Alu-SINE
12-130802380	ENSG00000111450_STX2	Villus of Intermediate	Male	Han_sites	-	intronic	Alu-SINE
12-130802552	ENSG00000111450_STX2	Chorionic Plate	Male	up_sites	0.0184395	intronic	Alu-SINE
12-130802709	ENSG00000111450_STX2	Chorionic Plate	Male	up_sites	0.0307994	intronic	Alu-SINE
12-130802709	ENSG00000111450_STX2	Umbilical Cord	Male	up_sites	0.0101738	intronic	Alu-SINE
20-45078229	ENSG00000101109_STK4	Amnion	Male	up_sites	0.0370673	UTR3	Alu-SINE
20-45079068	ENSG00000101109_STK4	Amnion	Male	up_sites	0.0407843	UTR3	Alu-SINE
X-119538510	ENSG00000018610_STEEP1	Umbilical Cord	Male	up_sites	0.000320802	UTR3	Alu-SINE
X-119538562	ENSG00000018610_STEEP1	Chorion	Male	up_sites	0.0112592	UTR3	Alu-SINE
3-156541528	ENSG00000114850_SSR3	Amnion	Male	up_sites	0.00347145	UTR3	Alu-SINE
1-225787046	ENSG00000143742_SRP9	Chorionic Plate	Male	down_sites	0.0453661	intronic	Alu-SINE
1-225788541	ENSG00000143742_SRP9	Chorionic Plate	Male	Han_sites	-	intronic	Alu-SINE
1-225788545	ENSG00000143742_SRP9	Umbilical Cord	Male	up_sites	0.0297354	intronic	Alu-SINE
5-112891790	ENSG00000153037_SRP19	Villus of Fetal	Male	down_sites	0.0246105	ncRNA_exonic	-
5-179821142	ENSG00000161011_SQSTM1	Villus of Intermediate	Male	up_sites	0.00791562	splicing	-
13-49913178	ENSG00000123178_SPRYD7	Chorion	Male	up_sites	0.00924869	UTR3	Alu-SINE
13-49913254	ENSG00000123178_SPRYD7	Chorion	Male	up_sites	0.00900634	UTR3	Alu-SINE
13-49913337	ENSG00000123178_SPRYD7	Chorion	Male	up_sites	0.0421781	UTR3	Alu-SINE
13-49913595	ENSG00000123178_SPRYD7	Chorion	Male	up_sites	0.0302324	UTR3	Alu-SINE
13-49913651	ENSG00000123178_SPRYD7	Chorion	Male	up_sites	0.0163165	UTR3	Alu-SINE
13-49913687	ENSG00000123178_SPRYD7	Chorion	Male	up_sites	0.0273471	UTR3	Alu-SINE
15-50703468	ENSG00000138600_SPPL2A	Umbilical Cord	Male	up_sites	0.0128072	UTR3	Alu-SINE
15-50703527	ENSG00000138600_SPPL2A	Villus of Intermediate	Male	up_sites	0.000549531	UTR3	Alu-SINE
15-50704132	ENSG00000138600_SPPL2A	Umbilical Cord	Male	up_sites	0.00448939	UTR3	Alu-SINE
15-50704180	ENSG00000138600_SPPL2A	Chorion	Male	up_sites	0.00213743	UTR3	Alu-SINE
15-50704303	ENSG00000138600_SPPL2A	Chorion	Male	up_sites	0.015277	UTR3	Alu-SINE
8-47511265	ENSG00000164808_SPIDR	Villus of Intermediate	Male	up_sites	0.0127765	ncRNA_exonic	-
8-47511992	ENSG00000164808_SPIDR	Villus of Fetal	Male	up_sites	0.0138451	ncRNA_exonic	-
8-47511995	ENSG00000164808_SPIDR	Villus of Fetal	Male	up_sites	0.00965695	ncRNA_exonic	-
16-89520477	ENSG00000197912_SPG7	Chorion	Male	down_sites	0.0369946	intronic	Alu-SINE
4-176331176	ENSG00000129128_SPCS3	Umbilical Cord	Male	up_sites	0.0172119	UTR3	-
17-50964917	ENSG00000008294_SPAG9	Amnion	Male	up_sites	0.0312233	UTR3	Alu-SINE
17-50964962	ENSG00000008294_SPAG9	Amnion	Male	up_sites	0.0111605	UTR3	Alu-SINE
10-95390860	ENSG00000095637_SORBS1	Umbilical Cord	Male	up_sites	0.0033952	intronic	Alu-SINE
20-36781453	ENSG00000149639_SOGA1	Chorion	Male	up_sites	0.0418685	UTR3	Alu-SINE
20-36781998	ENSG00000149639_SOGA1	Villus of Fetal	Male	up_sites	0.00364473	UTR3	Alu-SINE
20-36781998	ENSG00000149639_SOGA1	Villus of Maternal	Male	up_sites	0.00607868	UTR3	Alu-SINE
20-36782112	ENSG00000149639_SOGA1	Amnion	Male	up_sites	0.0455258	UTR3	Alu-SINE
1-179357875	ENSG00000057252_SOAT1	Chorion	Male	up_sites	0.0138754	UTR3	-
20-45838348	ENSG00000124104_SNX21	Chorionic Plate	Male	up_sites	0.00729536	intronic	Alu-SINE
22-41676896	ENSG00000100138_SNU13	Villus of Maternal	Male	Han_sites	-	ncRNA_exonic	-
16-69306869	ENSG00000168807_SNTB2	Chorion	Male	Han_sites	-	UTR3	Alu-SINE
22-24573003	ENSG00000100028_SNRPD3	Umbilical Cord	Male	up_sites	0.000627492	UTR3	Alu-SINE
22-24573015	ENSG00000100028_SNRPD3	Villus of Intermediate	Male	Han_sites	-	UTR3	Alu-SINE
22-24573832	ENSG00000100028_SNRPD3	Amnion	Male	up_sites	0.00059865	UTR3	Alu-SINE
14-61795894	ENSG00000023608_SNAPC1	Chorion	Male	Han_sites	-	UTR3	Alu-SINE
14-61795946	ENSG00000023608_SNAPC1	Umbilical Cord	Male	up_sites	0.0496417	UTR3	Alu-SINE
22-20890638	ENSG00000099940_SNAP29	Chorion	Male	Han_sites	-	ncRNA_intronic	Alu-SINE
17-1781012	ENSG00000186532_SMYD4	Amnion	Male	up_sites	0.0285179	UTR3	Alu-SINE
2-130158449	ENSG00000136699_SMPD4	Chorionic Plate	Male	down_sites	0.0270669	intronic	Alu-SINE
2-130159594	ENSG00000136699_SMPD4	Chorion	Male	up_sites	0.00141164	UTR5;UTR3	Alu-SINE
19-16641691	ENSG00000214046_SMIM7	Umbilical Cord	Male	up_sites	0.00175827	ncRNA_intronic	Alu-SINE
4-39549358	ENSG00000163683_SMIM14	Amnion	Male	up_sites	0.039795	ncRNA_intronic	Alu-SINE
4-39549388	ENSG00000163683_SMIM14	Amnion	Male	up_sites	0.00114935	ncRNA_intronic	Alu-SINE
4-39549547	ENSG00000163683_SMIM14	Chorionic Plate	Male	up_sites	0.0139013	ncRNA_intronic	Alu-SINE
4-39549559	ENSG00000163683_SMIM14	Amnion	Male	up_sites	0.0186384	ncRNA_intronic	Alu-SINE
17-1583981	ENSG00000167703_SLC43A2	Chorionic Plate	Male	down_sites	0.000742141	intronic	Alu-SINE
17-81248096	ENSG00000157637_SLC38A10	Chorionic Plate	Male	up_sites	0.0387225	intronic	Alu-SINE
2-113707622	ENSG00000115084_SLC35F5	Umbilical Cord	Male	up_sites	0.0158609	UTR3	Alu-SINE
2-113707632	ENSG00000115084_SLC35F5	Villus of Maternal	Male	up_sites	0.0033269	UTR3	Alu-SINE
2-113708461	ENSG00000115084_SLC35F5	Chorion	Male	up_sites	0.0106753	UTR3	Alu-SINE
2-113708539	ENSG00000115084_SLC35F5	Chorionic Plate	Male	up_sites	0.0116152	UTR3	Alu-SINE
2-113709923	ENSG00000115084_SLC35F5	Amnion	Male	up_sites	0.037418	UTR3	Alu-SINE
2-113710048	ENSG00000115084_SLC35F5	Umbilical Cord	Male	up_sites	0.0100688	UTR3	Alu-SINE
2-113710053	ENSG00000115084_SLC35F5	Umbilical Cord	Male	up_sites	0.00708201	UTR3	Alu-SINE
22-30660998	ENSG00000100036_SLC35E4	Amnion	Male	up_sites	0.0166564	intronic	Alu-SINE
1-1663539	ENSG00000189339_SLC35E2B	Villus of Intermediate	Male	Han_sites	-	UTR3	Alu-SINE
1-1663609	ENSG00000189339_SLC35E2B	Umbilical Cord	Male	up_sites	0.00223751	UTR3	Alu-SINE
1-1664088	ENSG00000189339_SLC35E2B	Umbilical Cord	Male	up_sites	0.0461704	UTR3	Alu-SINE
19-16550468	ENSG00000127526_SLC35E1	Chorion	Male	up_sites	0.0125169	UTR3	Alu-SINE
19-16550474	ENSG00000127526_SLC35E1	Chorion	Male	up_sites	0.0356277	UTR3	Alu-SINE
19-16550480	ENSG00000127526_SLC35E1	Amnion	Male	up_sites	0.00241018	UTR3	Alu-SINE
19-16550486	ENSG00000127526_SLC35E1	Amnion	Male	up_sites	0.0220288	UTR3	Alu-SINE
19-16550487	ENSG00000127526_SLC35E1	Amnion	Male	up_sites	0.0256924	UTR3	Alu-SINE
19-16550487	ENSG00000127526_SLC35E1	Chorion	Male	up_sites	0.0115537	UTR3	Alu-SINE
19-16550548	ENSG00000127526_SLC35E1	Amnion	Male	up_sites	0.0169305	UTR3	Alu-SINE
19-16550565	ENSG00000127526_SLC35E1	Amnion	Male	up_sites	0.025817	UTR3	Alu-SINE
19-16550565	ENSG00000127526_SLC35E1	Umbilical Cord	Male	up_sites	0.00654115	UTR3	Alu-SINE
19-16550568	ENSG00000127526_SLC35E1	Amnion	Male	up_sites	0.0036844	UTR3	Alu-SINE
19-16550623	ENSG00000127526_SLC35E1	Amnion	Male	Tibetan_sites	-	UTR3	Alu-SINE
1-100023951	ENSG00000117620_SLC35A3	Chorion	Male	up_sites	0.0485707	UTR3	Alu-SINE
12-7964053	ENSG00000059804_SLC2A3	Chorion	Male	up_sites	0.0168995	ncRNA_intronic	Alu-SINE
12-7964147	ENSG00000059804_SLC2A3	Chorion	Male	up_sites	0.0185453	ncRNA_intronic	Alu-SINE
12-7970442	ENSG00000059804_SLC2A3	Chorion	Male	up_sites	0.0372101	ncRNA_intronic	Alu-SINE
12-7970468	ENSG00000059804_SLC2A3	Chorion	Male	up_sites	0.000359381	ncRNA_intronic	Alu-SINE
12-7970498	ENSG00000059804_SLC2A3	Chorion	Male	up_sites	0.0349305	ncRNA_intronic	Alu-SINE
12-7970530	ENSG00000059804_SLC2A3	Chorion	Male	up_sites	0.0355979	ncRNA_intronic	Alu-SINE
5-149983767	ENSG00000155850_SLC26A2	Chorionic Plate	Male	Han_sites	-	UTR3	Alu-SINE
12-98604855	ENSG00000075415_SLC25A3	Amnion	Male	up_sites	0.0433758	UTR3	Alu-SINE
12-98604855	ENSG00000075415_SLC25A3	Chorion	Male	up_sites	0.0112858	UTR3	Alu-SINE
12-98605700	ENSG00000075415_SLC25A3	Chorion	Male	up_sites	0.0439484	UTR3	Alu-SINE
12-98605857	ENSG00000075415_SLC25A3	Umbilical Cord	Male	up_sites	0.001726	UTR3	Alu-SINE
12-98606008	ENSG00000075415_SLC25A3	Amnion	Male	up_sites	0.0181642	UTR3	Alu-SINE
12-98606008	ENSG00000075415_SLC25A3	Umbilical Cord	Male	up_sites	0.00175412	UTR3	Alu-SINE
10-68478918	ENSG00000122912_SLC25A16	Chorion	Male	Han_sites	-	UTR3	Alu-SINE
10-68481969	ENSG00000122912_SLC25A16	Chorionic Plate	Male	Han_sites	-	UTR3	Alu-SINE
8-42531915	ENSG00000168575_SLC20A2	Chorion	Male	Han_sites	-	intronic	Alu-SINE
8-42533516	ENSG00000168575_SLC20A2	Umbilical Cord	Male	up_sites	0.000190305	intronic	Alu-SINE
8-42533771	ENSG00000168575_SLC20A2	Umbilical Cord	Male	up_sites	0.0301401	intronic	Alu-SINE
8-42533796	ENSG00000168575_SLC20A2	Umbilical Cord	Male	up_sites	0.0342368	intronic	Alu-SINE
8-42534132	ENSG00000168575_SLC20A2	Villus of Fetal	Male	up_sites	0.0175505	intronic	Alu-SINE
8-42534196	ENSG00000168575_SLC20A2	Amnion	Male	up_sites	0.0439544	intronic	Alu-SINE
8-42534196	ENSG00000168575_SLC20A2	Umbilical Cord	Male	up_sites	0.00258455	intronic	Alu-SINE
8-42534196	ENSG00000168575_SLC20A2	Villus of Maternal	Male	up_sites	0.0374592	intronic	Alu-SINE
2-227686085	ENSG00000135917_SLC19A3	Umbilical Cord	Male	up_sites	0.0294712	UTR3	Alu-SINE
2-227686089	ENSG00000135917_SLC19A3	Villus of Maternal	Male	Han_sites	-	UTR3	Alu-SINE
6-73594290	ENSG00000119899_SLC17A5	Amnion	Male	up_sites	0.00423226	UTR3	Alu-SINE
17-75099448	ENSG00000170190_SLC16A5	Amnion	Male	up_sites	0.00667702	intronic	Alu-SINE
17-75104520	ENSG00000170190_SLC16A5	Chorion	Male	up_sites	0.000850611	intronic	Alu-SINE
7-100855222	ENSG00000146828_SLC12A9	Villus of Intermediate	Male	up_sites	0.0224023	intronic	Alu-SINE
7-100855356	ENSG00000146828_SLC12A9	Villus of Maternal	Male	Han_sites	-	intronic	Alu-SINE
15-34231108	ENSG00000140199_SLC12A6	Amnion	Male	up_sites	0.0088221	UTR3	Alu-SINE
15-34231142	ENSG00000140199_SLC12A6	Amnion	Male	up_sites	0.0125916	UTR3	Alu-SINE
15-34231142	ENSG00000140199_SLC12A6	Villus of Fetal	Male	Han_sites	-	UTR3	Alu-SINE
14-71330756	ENSG00000197555_SIPA1L1	Villus of Fetal	Male	Han_sites	-	intronic	-
19-16856711	ENSG00000127511_SIN3B	Villus of Maternal	Male	up_sites	0.0228371	intronic	Alu-SINE
11-111728911	ENSG00000170145_SIK2	Amnion	Male	up_sites	0.0459282	UTR3	Alu-SINE
19-51518405	ENSG00000105492_SIGLEC6	Chorion	Male	up_sites	0.00870969	UTR3	Alu-SINE
19-51518416	ENSG00000105492_SIGLEC6	Chorion	Male	up_sites	0.0249143	UTR3	Alu-SINE
19-51518528	ENSG00000105492_SIGLEC6	Chorion	Male	up_sites	0.0166564	UTR3	Alu-SINE
19-51518543	ENSG00000105492_SIGLEC6	Chorion	Male	up_sites	0.00205043	UTR3	Alu-SINE
19-51518544	ENSG00000105492_SIGLEC6	Chorion	Male	up_sites	0.00197403	UTR3	Alu-SINE
19-51518613	ENSG00000105492_SIGLEC6	Chorion	Male	up_sites	0.00747184	UTR3	Alu-SINE
19-51519137	ENSG00000105492_SIGLEC6	Chorion	Male	up_sites	0.0264946	UTR3	Alu-SINE
1-154964693	ENSG00000160691_SHC1	Amnion	Male	up_sites	0.0209724	intronic	Alu-SINE
4-2839825	ENSG00000087266_SH3BP2	Amnion	Male	up_sites	0.0089307	UTR3	Alu-SINE
1-168251251	ENSG00000213064_SFT2D2	Villus of Intermediate	Male	Han_sites	-	UTR3	Alu-SINE
22-31607521	ENSG00000198089_SFI1	Amnion	Male	up_sites	0.00821843	intronic	Alu-SINE
1-67409006	ENSG00000142864_SERBP1	Amnion	Male	up_sites	0.00192278	UTR3	Alu-SINE
22-50214241	ENSG00000073169_SELENOO	Villus of Fetal	Male	down_sites	0.0342368	intronic	Alu-SINE
11-43898586	ENSG00000213693_SEC14L1P1	Chorionic Plate	Male	Han_sites	-	ncRNA_exonic	-
11-43898647	ENSG00000213693_SEC14L1P1	Chorionic Plate	Male	Han_sites	-	ncRNA_exonic	-
6-70589050	ENSG00000154079_SDHAF4	Umbilical Cord	Male	up_sites	0.0173144	UTR3	Alu-SINE
6-70589266	ENSG00000154079_SDHAF4	Amnion	Male	up_sites	0.0425704	UTR3	Alu-SINE
8-26380940	ENSG00000228451_SDAD1P1	Umbilical Cord	Male	Han_sites	-	ncRNA_exonic	-
17-10673142	ENSG00000133028_SCO1	Villus of Intermediate	Male	up_sites	0.0200155	UTR3	Alu-SINE
17-10674318	ENSG00000133028_SCO1	Villus of Maternal	Male	Han_sites	-	UTR3	Alu-SINE
15-74847154	ENSG00000140497_SCAMP2	Amnion	Male	Tibetan_sites	-	intronic	Alu-SINE
10-70163639	ENSG00000079332_SAR1A	Chorionic Plate	Male	up_sites	0.011655	intronic	-
10-70163639	ENSG00000079332_SAR1A	Villus of Fetal	Male	up_sites	0.0381281	intronic	-
6-43029674	ENSG00000124541_RRP36	Villus of Maternal	Male	up_sites	0.0130469	intronic	Alu-SINE
6-43029679	ENSG00000124541_RRP36	Amnion	Male	up_sites	0.0146215	intronic	Alu-SINE
6-43029803	ENSG00000124541_RRP36	Villus of Intermediate	Male	up_sites	0.00635846	intronic	Alu-SINE
6-43029803	ENSG00000124541_RRP36	Villus of Maternal	Male	up_sites	0.0124145	intronic	Alu-SINE
6-43029855	ENSG00000124541_RRP36	Villus of Maternal	Male	up_sites	0.00740624	intronic	Alu-SINE
6-43030364	ENSG00000124541_RRP36	Chorionic Plate	Male	up_sites	0.0410269	intronic	Alu-SINE
6-43030364	ENSG00000124541_RRP36	Villus of Intermediate	Male	up_sites	0.000193694	intronic	Alu-SINE
6-43030457	ENSG00000124541_RRP36	Amnion	Male	up_sites	0.0110058	intronic	Alu-SINE
6-43030457	ENSG00000124541_RRP36	Umbilical Cord	Male	down_sites	0.017818	intronic	Alu-SINE
6-43030496	ENSG00000124541_RRP36	Villus of Maternal	Male	down_sites	0.0274596	intronic	Alu-SINE
13-51460975	ENSG00000224892_RPS4XP16	Amnion	Male	Han_sites	-	ncRNA_exonic	-
3-184149818	ENSG00000228205_RPS3P3	Villus of Maternal	Male	Tibetan_sites	-	ncRNA_exonic	-
19-41871486	ENSG00000105372_RPS19	Amnion	Male	up_sites	0.0238202	UTR3	Alu-SINE
19-41871486	ENSG00000105372_RPS19	Chorion	Male	up_sites	0.0366139	UTR3	Alu-SINE
19-41871534	ENSG00000105372_RPS19	Amnion	Male	up_sites	0.0161166	UTR3	Alu-SINE
19-41871544	ENSG00000105372_RPS19	Amnion	Male	up_sites	0.0072849	UTR3	Alu-SINE
19-41871556	ENSG00000105372_RPS19	Amnion	Male	up_sites	0.0146288	UTR3	Alu-SINE
19-41871559	ENSG00000105372_RPS19	Amnion	Male	up_sites	0.016274	UTR3	Alu-SINE
19-41872642	ENSG00000105372_RPS19	Amnion	Male	up_sites	9.53634e-05	UTR3	Alu-SINE
19-41872774	ENSG00000105372_RPS19	Chorion	Male	up_sites	0.0127481	UTR3	Alu-SINE
19-41872816	ENSG00000105372_RPS19	Amnion	Male	up_sites	0.0302439	UTR3	Alu-SINE
6-42888216	ENSG00000146223_RPL7L1	Amnion	Male	up_sites	0.00356163	UTR3	Alu-SINE
6-42888438	ENSG00000146223_RPL7L1	Amnion	Male	up_sites	0.00105579	UTR3	Alu-SINE
6-42888438	ENSG00000146223_RPL7L1	Umbilical Cord	Male	up_sites	0.00194382	UTR3	Alu-SINE
2-216501818	ENSG00000197756_RPL37A	Amnion	Male	up_sites	0.0231024	UTR3	Alu-SINE
2-216502145	ENSG00000197756_RPL37A	Chorion	Male	up_sites	0.0354118	UTR3	Alu-SINE
2-216502171	ENSG00000197756_RPL37A	Chorion	Male	up_sites	0.0345491	UTR3	Alu-SINE
2-216502207	ENSG00000197756_RPL37A	Amnion	Male	up_sites	0.0208998	UTR3	Alu-SINE
2-216502207	ENSG00000197756_RPL37A	Umbilical Cord	Male	up_sites	0.0164779	UTR3	Alu-SINE
8-98043209	ENSG00000156482_RPL30	Amnion	Male	up_sites	0.0198668	ncRNA_exonic	Alu-SINE
8-98043405	ENSG00000156482_RPL30	Villus of Intermediate	Male	Han_sites	-	ncRNA_intronic	Alu-SINE
11-8686293	ENSG00000166441_RPL27A	Amnion	Male	up_sites	0.0217356	UTR3	Alu-SINE
11-8686293	ENSG00000166441_RPL27A	Chorionic Plate	Male	up_sites	0.0202034	UTR3	Alu-SINE
11-8687235	ENSG00000166441_RPL27A	Amnion	Male	up_sites	0.0164453	UTR3	Alu-SINE
11-8687238	ENSG00000166441_RPL27A	Umbilical Cord	Male	up_sites	0.00364507	UTR3	Alu-SINE
11-8687278	ENSG00000166441_RPL27A	Amnion	Male	up_sites	0.00794333	UTR3	Alu-SINE
19-58584082	ENSG00000213753_RPL23AP79	Amnion	Male	up_sites	0.00611628	ncRNA_exonic	Alu-SINE
19-58584089	ENSG00000213753_RPL23AP79	Amnion	Male	up_sites	0.00556471	ncRNA_exonic	Alu-SINE
19-58584115	ENSG00000213753_RPL23AP79	Amnion	Male	up_sites	0.00193031	ncRNA_exonic	Alu-SINE
19-58584115	ENSG00000213753_RPL23AP79	Villus of Maternal	Male	up_sites	0.0153758	ncRNA_exonic	Alu-SINE
19-58584206	ENSG00000213753_RPL23AP79	Amnion	Male	up_sites	0.0121391	ncRNA_exonic	Alu-SINE
19-58584206	ENSG00000213753_RPL23AP79	Umbilical Cord	Male	up_sites	0.0476609	ncRNA_exonic	Alu-SINE
3-40462644	ENSG00000188846_RPL14	Amnion	Male	up_sites	0.0149327	UTR3	Alu-SINE
20-3928672	ENSG00000101236_RNF24	Amnion	Male	up_sites	0.0210589	UTR3	Alu-SINE
17-80320453	ENSG00000173821_RNF213	Chorion	Male	up_sites	0.0385164	UTR3	Alu-SINE
17-80320942	ENSG00000173821_RNF213	Amnion	Male	up_sites	0.0061253	UTR3	Alu-SINE
1-145745486	ENSG00000265491_RNF115	Chorion	Male	up_sites	0.00665298	UTR3	Alu-SINE
1-145745519	ENSG00000265491_RNF115	Villus of Maternal	Male	up_sites	0.0102295	UTR3	Alu-SINE
1-145745521	ENSG00000265491_RNF115	Amnion	Male	up_sites	0.0264443	UTR3	Alu-SINE
5-112891790	ENSG00000129625_REEP5	Villus of Fetal	Male	down_sites	0.0246105	ncRNA_exonic	-
19-55039275	ENSG00000160439_RDH13	Chorion	Male	up_sites	0.00456646	ncRNA_intronic	Alu-SINE
19-55039287	ENSG00000160439_RDH13	Chorion	Male	up_sites	0.0138348	ncRNA_intronic	Alu-SINE
19-55040227	ENSG00000160439_RDH13	Amnion	Male	up_sites	0.0139023	ncRNA_intronic	Alu-SINE
19-55040291	ENSG00000160439_RDH13	Amnion	Male	Tibetan_sites	-	ncRNA_intronic	Alu-SINE
19-55043556	ENSG00000160439_RDH13	Amnion	Male	up_sites	0.00396628	ncRNA_intronic	Alu-SINE
19-55043616	ENSG00000160439_RDH13	Amnion	Male	up_sites	0.00151141	ncRNA_intronic	Alu-SINE
3-15072386	ENSG00000131381_RBSN	Villus of Intermediate	Male	up_sites	0.0383011	ncRNA_intronic	Alu-SINE
3-15072786	ENSG00000131381_RBSN	Chorionic Plate	Male	up_sites	0.0237748	ncRNA_intronic	Alu-SINE
12-56577575	ENSG00000076067_RBMS2	Villus of Fetal	Male	down_sites	0.0219962	intronic	Alu-SINE
12-56578363	ENSG00000076067_RBMS2	Villus of Fetal	Male	Han_sites	-	intronic	Alu-SINE
1-145921979	ENSG00000265241_RBM8A	Amnion	Male	up_sites	0.00592369	ncRNA_intronic	Alu-SINE
1-145922969	ENSG00000265241_RBM8A	Chorion	Male	up_sites	0.0414142	ncRNA_intronic	Alu-SINE
3-50112973	ENSG00000003756_RBM5	Chorionic Plate	Male	Han_sites	-	intronic	Alu-SINE
3-50113054	ENSG00000003756_RBM5	Amnion	Male	up_sites	0.0475723	intronic	Alu-SINE
X-48580461	ENSG00000102317_RBM3	Chorion	Male	up_sites	0.0442998	ncRNA_intronic	Alu-SINE
20-18487695	ENSG00000089050_RBBP9	Amnion	Male	up_sites	0.0233637	UTR3	Alu-SINE
3-50332595	ENSG00000068028_RASSF1	Chorion	Male	up_sites	0.021126	intronic	Alu-SINE
3-50333726	ENSG00000068028_RASSF1	Villus of Intermediate	Male	up_sites	0.0424484	intronic	Alu-SINE
2-33584227	ENSG00000119812_RASGRP3-AS1	Amnion	Male	Tibetan_sites	-	UTR3	-
2-33584227	ENSG00000119812_RASGRP3-AS1	Chorionic Plate	Male	Tibetan_sites	-	UTR3	-
2-33584227	ENSG00000119812_RASGRP3-AS1	Umbilical Cord	Male	Tibetan_sites	-	UTR3	-
2-33584227	ENSG00000119812_RASGRP3-AS1	Villus of Fetal	Male	Tibetan_sites	-	UTR3	-
2-33584227	ENSG00000119812_RASGRP3-AS1	Villus of Intermediate	Male	Tibetan_sites	-	UTR3	-
2-33584227	ENSG00000119812_RASGRP3-AS1	Villus of Maternal	Male	Tibetan_sites	-	UTR3	-
6-149820961	ENSG00000285991_RAET1E	Umbilical Cord	Male	up_sites	0.0255698	ncRNA_intronic	Alu-SINE
6-149821134	ENSG00000285991_RAET1E	Amnion	Male	up_sites	0.00350997	ncRNA_intronic	Alu-SINE
6-149822103	ENSG00000285991_RAET1E	Amnion	Male	up_sites	0.0196779	ncRNA_intronic	Alu-SINE
6-149822103	ENSG00000285991_RAET1E	Chorion	Male	up_sites	0.00659142	ncRNA_intronic	Alu-SINE
6-149822299	ENSG00000285991_RAET1E	Chorion	Male	up_sites	0.0019013	ncRNA_intronic	Alu-SINE
6-149822318	ENSG00000285991_RAET1E	Chorionic Plate	Male	Han_sites	-	ncRNA_intronic	Alu-SINE
6-149825813	ENSG00000285991_RAET1E	Amnion	Male	up_sites	0.0020349	ncRNA_intronic	Alu-SINE
6-149825900	ENSG00000285991_RAET1E	Amnion	Male	up_sites	0.025202	ncRNA_intronic	Alu-SINE
14-21460473	ENSG00000129472_RAB2B	Amnion	Male	up_sites	0.0128049	UTR3	Alu-SINE
14-21460522	ENSG00000129472_RAB2B	Chorion	Male	up_sites	0.0108069	UTR3	Alu-SINE
14-21460751	ENSG00000129472_RAB2B	Amnion	Male	up_sites	0.0176697	UTR3	Alu-SINE
14-21460839	ENSG00000129472_RAB2B	Villus of Fetal	Male	up_sites	0.0044913	UTR3	Alu-SINE
19-1372712	ENSG00000160953_PWWP3A	Chorionic Plate	Male	up_sites	0.00582188	ncRNA_exonic	Alu-SINE
19-44665523	ENSG00000073008_PVR	Chorion	Male	up_sites	0.0110814	ncRNA_exonic	Alu-SINE
19-44665527	ENSG00000073008_PVR	Villus of Maternal	Male	down_sites	0.0354653	ncRNA_exonic	Alu-SINE
2-130362244	ENSG00000072135_PTPN18	Amnion	Male	up_sites	0.025654	intronic	Alu-SINE
1-214351213	ENSG00000152104_PTPN14	Amnion	Male	up_sites	0.00611628	ncRNA_intronic	Alu-SINE
1-214351233	ENSG00000152104_PTPN14	Chorionic Plate	Male	up_sites	0.0335291	ncRNA_intronic	Alu-SINE
10-87946046	ENSG00000171862_PTEN	Villus of Fetal	Male	down_sites	0.0208133	intronic	-
10-87946054	ENSG00000171862_PTEN	Villus of Intermediate	Male	down_sites	0.0158711	intronic	-
10-87946056	ENSG00000171862_PTEN	Villus of Intermediate	Male	down_sites	0.0125778	intronic	-
16-57177869	ENSG00000172775_PSME3IP1	Villus of Fetal	Male	up_sites	0.0162932	ncRNA_intronic	Alu-SINE
17-67338637	ENSG00000197170_PSMD12	Amnion	Male	up_sites	0.0345187	UTR3	Alu-SINE
17-67338651	ENSG00000197170_PSMD12	Amnion	Male	up_sites	0.0254838	UTR3	Alu-SINE
17-67338712	ENSG00000197170_PSMD12	Chorion	Male	up_sites	0.00681482	UTR3	Alu-SINE
1-35600107	ENSG00000126067_PSMB2	Amnion	Male	Han_sites	-	UTR3	Alu-SINE
1-35602237	ENSG00000126067_PSMB2	Amnion	Male	up_sites	0.00469238	UTR3	Alu-SINE
1-35602324	ENSG00000126067_PSMB2	Amnion	Male	up_sites	0.00819625	UTR3	Alu-SINE
1-35602594	ENSG00000126067_PSMB2	Umbilical Cord	Male	Han_sites	-	UTR3	Alu-SINE
1-35602630	ENSG00000126067_PSMB2	Amnion	Male	up_sites	0.0173539	UTR3	Alu-SINE
1-35602694	ENSG00000126067_PSMB2	Amnion	Male	up_sites	0.0256098	UTR3	Alu-SINE
1-35602724	ENSG00000126067_PSMB2	Amnion	Male	up_sites	0.00223416	UTR3	Alu-SINE
16-31132599	ENSG00000052344_PRSS8	Amnion	Male	down_sites	0.0256662	intronic	-
19-35770769	ENSG00000167595_PROSER3	Villus of Maternal	Male	down_sites	0.0229793	ncRNA_exonic	Alu-SINE
2-178435308	ENSG00000180228_PRKRA	Chorionic Plate	Male	up_sites	0.0472837	ncRNA_intronic	Alu-SINE
19-11450218	ENSG00000130175_PRKCSH	Chorion	Male	up_sites	0.00549689	intronic	Alu-SINE
3-48750251	ENSG00000114302_PRKAR2A	Chorionic Plate	Male	up_sites	0.0313539	UTR3	Alu-SINE
6-32165663	ENSG00000258388_PPT2-EGFL8	Chorionic Plate	Male	Han_sites	-	intronic	Alu-SINE
6-32165756	ENSG00000258388_PPT2-EGFL8	Chorionic Plate	Male	up_sites	0.0139483	intronic	Alu-SINE
11-111728911	ENSG00000137713_PPP2R1B	Amnion	Male	up_sites	0.0459282	UTR3	Alu-SINE
19-45393185	ENSG00000104881_PPP1R13L	Amnion	Male	up_sites	0.00858228	intronic	Alu-SINE
19-45393185	ENSG00000104881_PPP1R13L	Villus of Maternal	Male	up_sites	0.0426596	intronic	Alu-SINE
19-45394256	ENSG00000104881_PPP1R13L	Chorion	Male	up_sites	0.00117239	intronic	Alu-SINE
19-45394270	ENSG00000104881_PPP1R13L	Amnion	Male	up_sites	0.0247262	intronic	Alu-SINE
19-45394270	ENSG00000104881_PPP1R13L	Chorion	Male	up_sites	0.0201775	intronic	Alu-SINE
19-45394417	ENSG00000104881_PPP1R13L	Chorion	Male	up_sites	0.00260906	intronic	Alu-SINE
19-45394581	ENSG00000104881_PPP1R13L	Umbilical Cord	Male	down_sites	0.00936177	intronic	Alu-SINE
1-39546569	ENSG00000243970_PPIEL	Chorion	Male	Han_sites	-	ncRNA_intronic	Alu-SINE
7-44802258	ENSG00000196262_PPIA	Umbilical Cord	Male	up_sites	0.0222967	UTR3	Alu-SINE
7-44802329	ENSG00000196262_PPIA	Chorionic Plate	Male	up_sites	0.00240415	UTR3	Alu-SINE
3-184363953	ENSG00000163882_POLR2H	Amnion	Male	up_sites	0.0210855	intronic	Alu-SINE
3-184364307	ENSG00000163882_POLR2H	Amnion	Male	up_sites	0.0303405	intronic	Alu-SINE
3-184364330	ENSG00000163882_POLR2H	Amnion	Male	up_sites	0.0150246	intronic	Alu-SINE
2-127843890	ENSG00000144231_POLR2D	Chorion	Male	up_sites	0.00993329	UTR3	Alu-SINE
9-37503395	ENSG00000137054_POLR1E	Amnion	Male	up_sites	0.00235655	UTR3	Alu-SINE
X-153677054	ENSG00000130822_PNCK	Chorion	Male	up_sites	0.0204421	intronic	Alu-SINE
10-20286764	ENSG00000120594_PLXDC2	Umbilical Cord	Male	up_sites	0.0107096	UTR3	Alu-SINE
10-20286825	ENSG00000120594_PLXDC2	Chorion	Male	Han_sites	-	UTR3	Alu-SINE
19-39427577	ENSG00000090924_PLEKHG2	Villus of Maternal	Male	up_sites	0.00078817	UTR3	Alu-SINE
12-45174516	ENSG00000134297_PLEKHA8P1	Chorion	Male	up_sites	0.0212958	ncRNA_exonic	-
12-45174536	ENSG00000134297_PLEKHA8P1	Chorion	Male	up_sites	0.0454878	ncRNA_exonic	-
12-45174707	ENSG00000134297_PLEKHA8P1	Villus of Fetal	Male	Han_sites	-	ncRNA_exonic	-
8-38970748	ENSG00000169499_PLEKHA2	Chorion	Male	up_sites	0.00501102	ncRNA_intronic	Alu-SINE
12-113391109	ENSG00000151176_PLBD2	Chorion	Male	up_sites	0.00564451	UTR3	-
1-20088237	ENSG00000127472_PLA2G5	Villus of Fetal	Male	up_sites	0.046166	intronic	Alu-SINE
5-126625355	ENSG00000164902_PHAX	Amnion	Male	up_sites	0.00962786	UTR3	Alu-SINE
5-126625387	ENSG00000164902_PHAX	Amnion	Male	up_sites	0.0257189	UTR3	Alu-SINE
5-126625474	ENSG00000164902_PHAX	Villus of Fetal	Male	up_sites	0.0167734	UTR3	Alu-SINE
5-126625476	ENSG00000164902_PHAX	Villus of Fetal	Male	up_sites	0.0306627	UTR3	Alu-SINE
5-126625931	ENSG00000164902_PHAX	Villus of Maternal	Male	up_sites	0.0160841	UTR3	Alu-SINE
5-126625957	ENSG00000164902_PHAX	Chorionic Plate	Male	up_sites	0.0376974	UTR3	Alu-SINE
1-28498819	ENSG00000204138_PHACTR4	Umbilical Cord	Male	up_sites	0.00876175	UTR3	Alu-SINE
1-28499200	ENSG00000204138_PHACTR4	Chorion	Male	up_sites	0.0339958	UTR3	Alu-SINE
1-28499307	ENSG00000204138_PHACTR4	Chorion	Male	up_sites	0.0265283	UTR3	Alu-SINE
1-28499318	ENSG00000204138_PHACTR4	Chorion	Male	up_sites	0.00630205	UTR3	Alu-SINE
1-28499519	ENSG00000204138_PHACTR4	Umbilical Cord	Male	up_sites	0.00498161	UTR3	Alu-SINE
1-28499573	ENSG00000204138_PHACTR4	Chorionic Plate	Male	up_sites	0.00479568	UTR3	Alu-SINE
1-28499606	ENSG00000204138_PHACTR4	Villus of Maternal	Male	Han_sites	-	UTR3	Alu-SINE
17-78422975	ENSG00000087157_PGS1	Amnion	Male	up_sites	0.0229474	intronic	Alu-SINE
19-18365515	ENSG00000130517_PGPEP1	Chorion	Male	up_sites	0.00121368	UTR3	Alu-SINE
12-132721831	ENSG00000247077_PGAM5	Chorion	Male	up_sites	0.040456	UTR3	Alu-SINE
12-132721837	ENSG00000247077_PGAM5	Chorion	Male	up_sites	0.0355626	UTR3	Alu-SINE
12-132721837	ENSG00000247077_PGAM5	Umbilical Cord	Male	up_sites	0.00964301	UTR3	Alu-SINE
2-61049630	ENSG00000162928_PEX13	Chorion	Male	up_sites	0.0347543	UTR3	Alu-SINE
20-50118691	ENSG00000124208_PEDS1-UBE2V1	Chorionic Plate	Male	Han_sites	-	UTR3	Alu-SINE
20-50118716	ENSG00000124208_PEDS1-UBE2V1	Chorionic Plate	Male	Han_sites	-	UTR3	Alu-SINE
20-50118691	ENSG00000240849_PEDS1	Chorionic Plate	Male	Han_sites	-	UTR3	Alu-SINE
20-50118716	ENSG00000240849_PEDS1	Chorionic Plate	Male	Han_sites	-	UTR3	Alu-SINE
17-64321540	ENSG00000261371_PECAM1	Chorionic Plate	Male	Han_sites	-	UTR3	Alu-SINE
21-43730828	ENSG00000160209_PDXK	Chorionic Plate	Male	Han_sites	-	intronic	Alu-SINE
16-66890205	ENSG00000172840_PDP2	Villus of Maternal	Male	up_sites	0.0257889	UTR3	Alu-SINE
17-81651116	ENSG00000185527_PDE6G	Villus of Intermediate	Male	Han_sites	-	synonymous	-
17-81651131	ENSG00000185527_PDE6G	Villus of Intermediate	Male	Han_sites	-	synonymous	-
17-81651137	ENSG00000185527_PDE6G	Villus of Intermediate	Male	Han_sites	-	synonymous	-
17-81651143	ENSG00000185527_PDE6G	Villus of Intermediate	Male	Han_sites	-	synonymous	-
4-780465	ENSG00000249592_PCGF3-AS1	Chorionic Plate	Male	Han_sites	-	ncRNA_exonic	Alu-SINE
12-79597137	ENSG00000177425_PAWR	Umbilical Cord	Male	up_sites	0.0185039	intronic	Alu-SINE
9-116237981	ENSG00000182752_PAPPA	Chorionic Plate	Male	up_sites	0.0377183	intronic	Alu-SINE
20-3928672	ENSG00000125779_PANK2	Amnion	Male	up_sites	0.0210589	UTR3	Alu-SINE
4-56460149	ENSG00000128050_PAICS	Amnion	Male	up_sites	0.015521	UTR3	Alu-SINE
4-56460709	ENSG00000128050_PAICS	Amnion	Male	up_sites	0.00626124	UTR3	Alu-SINE
4-56460851	ENSG00000128050_PAICS	Amnion	Male	up_sites	0.000925286	UTR3	Alu-SINE
17-3900038	ENSG00000108405_P2RX1	Umbilical Cord	Male	Han_sites	-	intronic	Alu-SINE
1-203506220	ENSG00000188770_OPTC	Villus of Intermediate	Male	down_sites	0.0407748	intronic	Alu-SINE
19-45551099	ENSG00000125741_OPA3	Chorionic Plate	Male	Han_sites	-	UTR3	Alu-SINE
15-41299144	ENSG00000247556_OIP5-AS1	Amnion	Male	up_sites	7.78883e-05	ncRNA_exonic	Alu-SINE
15-41299253	ENSG00000247556_OIP5-AS1	Amnion	Male	up_sites	0.00348766	ncRNA_exonic	Alu-SINE
10-101787871	ENSG00000198408_OGA	Amnion	Male	up_sites	0.0224376	intronic	Alu-SINE
10-101789264	ENSG00000198408_OGA	Chorion	Male	up_sites	0.0128791	intronic	Alu-SINE
6-149724862	ENSG00000120253_NUP43	Umbilical Cord	Male	up_sites	0.00190554	UTR3	Alu-SINE
6-149725279	ENSG00000120253_NUP43	Chorion	Male	up_sites	0.0159155	UTR3	Alu-SINE
5-37291457	ENSG00000113569_NUP155	Villus of Maternal	Male	Han_sites	-	UTR3	Alu-SINE
11-8975599	ENSG00000175352_NRIP3	Amnion	Male	up_sites	0.0173433	ncRNA_intronic	Alu-SINE
4-2938420	ENSG00000087269_NOP14	Chorion	Male	up_sites	0.0167471	ncRNA_intronic	Alu-SINE
4-2938620	ENSG00000087269_NOP14	Chorion	Male	up_sites	0.00563619	ncRNA_intronic	Alu-SINE
4-2938670	ENSG00000087269_NOP14	Amnion	Male	up_sites	0.00382009	ncRNA_intronic	Alu-SINE
1-6524797	ENSG00000162408_NOL9	Umbilical Cord	Male	Han_sites	-	UTR3	Alu-SINE
2-130229974	ENSG00000213225_NOC2LP1	Chorion	Male	up_sites	0.0121888	ncRNA_exonic	-
2-130230106	ENSG00000213225_NOC2LP1	Villus of Fetal	Male	up_sites	0.0267146	ncRNA_exonic	-
2-130230106	ENSG00000213225_NOC2LP1	Villus of Maternal	Male	down_sites	0.0203415	ncRNA_exonic	-
1-9984252	ENSG00000173614_NMNAT1	Chorion	Male	Han_sites	-	ncRNA_intronic	Alu-SINE
19-54992742	ENSG00000022556_NLRP2	Villus of Maternal	Male	down_sites	0.00688531	intronic	Alu-SINE
3-49423656	ENSG00000145029_NICN1	Chorion	Male	up_sites	0.0445526	UTR3	Alu-SINE
3-49423887	ENSG00000145029_NICN1	Umbilical Cord	Male	up_sites	0.02077	UTR3	Alu-SINE
3-49423987	ENSG00000145029_NICN1	Villus of Maternal	Male	Han_sites	-	UTR3	Alu-SINE
3-49424070	ENSG00000145029_NICN1	Chorionic Plate	Male	up_sites	0.00547064	UTR3	Alu-SINE
1-184791991	ENSG00000135842_NIBAN1	Chorion	Male	up_sites	0.0119204	UTR3	Alu-SINE
1-184792186	ENSG00000135842_NIBAN1	Amnion	Male	Han_sites	-	UTR3	Alu-SINE
15-90275566	ENSG00000182768_NGRN	Amnion	Male	up_sites	0.0123998	ncRNA_exonic	-
15-90275577	ENSG00000182768_NGRN	Amnion	Male	up_sites	0.0271365	ncRNA_exonic	-
15-75352884	ENSG00000140398_NEIL1	Amnion	Male	up_sites	0.00639516	intronic	Alu-SINE
15-75353060	ENSG00000140398_NEIL1	Amnion	Male	up_sites	0.0164087	intronic	Alu-SINE
15-75353280	ENSG00000140398_NEIL1	Umbilical Cord	Male	up_sites	0.00678361	intronic	Alu-SINE
21-42908141	ENSG00000160194_NDUFV3	Villus of Fetal	Male	up_sites	0.033992	intronic	Alu-SINE
21-42909254	ENSG00000160194_NDUFV3	Umbilical Cord	Male	up_sites	0.0388171	UTR3	Alu-SINE
21-42911184	ENSG00000160194_NDUFV3	Umbilical Cord	Male	up_sites	0.0261657	UTR3	Alu-SINE
21-42911511	ENSG00000160194_NDUFV3	Villus of Intermediate	Male	Han_sites	-	UTR3	Alu-SINE
21-42911535	ENSG00000160194_NDUFV3	Chorionic Plate	Male	Han_sites	-	UTR3	Alu-SINE
21-42911608	ENSG00000160194_NDUFV3	Umbilical Cord	Male	Han_sites	-	UTR3	Alu-SINE
2-206116967	ENSG00000023228_NDUFS1	Chorion	Male	up_sites	0.0206817	ncRNA_intronic	Alu-SINE
2-206116975	ENSG00000023228_NDUFS1	Umbilical Cord	Male	up_sites	0.0160361	ncRNA_intronic	Alu-SINE
2-206119005	ENSG00000023228_NDUFS1	Chorionic Plate	Male	Han_sites	-	ncRNA_intronic	Alu-SINE
2-206122372	ENSG00000023228_NDUFS1	Umbilical Cord	Male	up_sites	0.028478	UTR3	Alu-SINE
2-206122418	ENSG00000023228_NDUFS1	Amnion	Male	up_sites	0.0176428	UTR3	Alu-SINE
2-206122472	ENSG00000023228_NDUFS1	Chorionic Plate	Male	up_sites	0.024429	UTR3	Alu-SINE
2-206122480	ENSG00000023228_NDUFS1	Villus of Intermediate	Male	up_sites	0.00337212	UTR3	Alu-SINE
2-206122499	ENSG00000023228_NDUFS1	Chorionic Plate	Male	up_sites	0.00809392	UTR3	Alu-SINE
2-206122616	ENSG00000023228_NDUFS1	Chorionic Plate	Male	up_sites	0.0110854	UTR3	Alu-SINE
2-206122837	ENSG00000023228_NDUFS1	Amnion	Male	up_sites	0.00527117	UTR3	Alu-SINE
2-206122873	ENSG00000023228_NDUFS1	Amnion	Male	up_sites	0.0181755	UTR3	Alu-SINE
11-78069071	ENSG00000259112_NDUFC2-KCTD14	Chorionic Plate	Male	Han_sites	-	UTR3	Alu-SINE
11-78069071	ENSG00000151366_NDUFC2	Chorionic Plate	Male	Han_sites	-	UTR3	Alu-SINE
19-14568165	ENSG00000099795_NDUFB7	Villus of Maternal	Male	up_sites	0.000457767	intronic	Alu-SINE
16-15700252	ENSG00000072864_NDE1	Umbilical Cord	Male	up_sites	0.00269535	UTR3	Alu-SINE
16-15700334	ENSG00000072864_NDE1	Umbilical Cord	Male	up_sites	0.00820019	UTR3	Alu-SINE
16-15701100	ENSG00000072864_NDE1	Umbilical Cord	Male	up_sites	0.0247323	intronic	Alu-SINE
16-15701178	ENSG00000072864_NDE1	Umbilical Cord	Male	up_sites	0.00812702	intronic	Alu-SINE
16-15701187	ENSG00000072864_NDE1	Chorion	Male	up_sites	0.0147383	intronic	Alu-SINE
17-3823622	ENSG00000074356_NCBP3	Amnion	Male	up_sites	0.0036842	intronic	Alu-SINE
1-45610795	ENSG00000132780_NASP	Chorionic Plate	Male	up_sites	0.0427817	intronic	Alu-SINE
1-45610871	ENSG00000132780_NASP	Villus of Intermediate	Male	Han_sites	-	intronic	Alu-SINE
13-32524860	ENSG00000244754_N4BP2L2	Villus of Intermediate	Male	up_sites	0.027773	intronic	Alu-SINE
13-32525669	ENSG00000244754_N4BP2L2	Amnion	Male	up_sites	0.0255258	intronic	Alu-SINE
19-58568046	ENSG00000267858_MZF1-AS1	Chorion	Male	up_sites	0.0230423	ncRNA_intronic	Alu-SINE
19-58568046	ENSG00000099326_MZF1	Chorion	Male	up_sites	0.0230423	ncRNA_intronic	Alu-SINE
20-36545675	ENSG00000101335_MYL9	Villus of Fetal	Male	up_sites	0.00656763	ncRNA_intronic	Alu-SINE
20-36546784	ENSG00000101335_MYL9	Chorionic Plate	Male	up_sites	0.0475916	ncRNA_intronic	Alu-SINE
17-76675428	ENSG00000182534_MXRA7	Chorion	Male	up_sites	0.0043902	UTR3	Alu-SINE
3-9700945	ENSG00000163719_MTMR14	Villus of Intermediate	Male	Han_sites	-	ncRNA_intronic	Alu-SINE
8-97728672	ENSG00000147649_MTDH	Chorion	Male	up_sites	0.030545	UTR3	Alu-SINE
20-35218054	ENSG00000229230_MT1P3	Chorionic Plate	Male	Han_sites	-	ncRNA_exonic	-
2-233866463	ENSG00000224287_MSL3P1	Chorionic Plate	Male	up_sites	0.0330666	ncRNA_exonic	-
2-233866966	ENSG00000224287_MSL3P1	Amnion	Male	up_sites	0.00910721	ncRNA_exonic	-
2-233866966	ENSG00000224287_MSL3P1	Villus of Fetal	Male	up_sites	0.0272374	ncRNA_exonic	-
2-233866993	ENSG00000224287_MSL3P1	Amnion	Male	up_sites	0.0405762	ncRNA_exonic	-
2-233867035	ENSG00000224287_MSL3P1	Villus of Fetal	Male	up_sites	0.009709	ncRNA_exonic	-
2-233867085	ENSG00000224287_MSL3P1	Chorionic Plate	Male	up_sites	0.0159655	ncRNA_exonic	-
2-233867085	ENSG00000224287_MSL3P1	Villus of Intermediate	Male	up_sites	0.0305039	ncRNA_exonic	-
2-233867117	ENSG00000224287_MSL3P1	Amnion	Male	up_sites	0.0439484	ncRNA_exonic	-
2-233867117	ENSG00000224287_MSL3P1	Chorionic Plate	Male	up_sites	0.0358712	ncRNA_exonic	-
2-233867118	ENSG00000224287_MSL3P1	Amnion	Male	up_sites	0.043829	ncRNA_exonic	-
2-233867255	ENSG00000224287_MSL3P1	Chorionic Plate	Male	up_sites	0.0273339	ncRNA_exonic	-
1-19259059	ENSG00000053372_MRTO4	Amnion	Male	up_sites	0.00739927	UTR3	Alu-SINE
1-19259964	ENSG00000053372_MRTO4	Amnion	Male	up_sites	0.00234566	UTR3	Alu-SINE
1-19259964	ENSG00000053372_MRTO4	Villus of Fetal	Male	up_sites	0.0100917	UTR3	Alu-SINE
1-19259964	ENSG00000053372_MRTO4	Villus of Maternal	Male	down_sites	0.0345996	UTR3	Alu-SINE
10-73248973	ENSG00000182180_MRPS16	Chorionic Plate	Male	up_sites	0.0105885	ncRNA_exonic	Alu-SINE
10-73249115	ENSG00000182180_MRPS16	Chorionic Plate	Male	Han_sites	-	ncRNA_exonic	Alu-SINE
10-73250084	ENSG00000182180_MRPS16	Amnion	Male	up_sites	0.0251352	ncRNA_intronic	Alu-SINE
2-99195984	ENSG00000185414_MRPL30	Amnion	Male	up_sites	0.00330691	UTR3	Alu-SINE
2-99196345	ENSG00000185414_MRPL30	Chorionic Plate	Male	up_sites	0.0469158	UTR3	Alu-SINE
1-54647541	ENSG00000271723_MROH7-TTC4	Amnion	Male	Tibetan_sites	-	intronic	Alu-SINE
1-54647541	ENSG00000184313_MROH7	Amnion	Male	Tibetan_sites	-	intronic	Alu-SINE
19-13767429	ENSG00000037757_MRI1	Chorion	Male	Han_sites	-	intronic	Alu-SINE
19-13773247	ENSG00000037757_MRI1	Villus of Fetal	Male	Han_sites	-	ncRNA_intronic	Alu-SINE
19-13773701	ENSG00000037757_MRI1	Chorion	Male	up_sites	0.0155203	ncRNA_intronic	Alu-SINE
19-13773855	ENSG00000037757_MRI1	Amnion	Male	up_sites	0.00969079	ncRNA_exonic	Alu-SINE
11-94417105	ENSG00000020922_MRE11	Chorionic Plate	Male	up_sites	0.0389552	UTR3	Alu-SINE
20-35218054	ENSG00000126005_MMP24OS	Chorionic Plate	Male	Han_sites	-	ncRNA_exonic	-
X-134546392	ENSG00000208005_MIR503	Villus of Fetal	Male	Han_sites	-	ncRNA_exonic	-
15-51273968	ENSG00000259240_MIR4713HG	Villus of Fetal	Male	up_sites	0.0366009	ncRNA_intronic	Alu-SINE
5-132365003	ENSG00000233006_MIR3936HG	Amnion	Male	up_sites	0.0120664	ncRNA_exonic	Alu-SINE
16-14327036	ENSG00000262454_MIR193BHG	Umbilical Cord	Male	up_sites	0.0050396	ncRNA_exonic	Alu-SINE
16-14327046	ENSG00000262454_MIR193BHG	Umbilical Cord	Male	up_sites	0.0316786	ncRNA_exonic	Alu-SINE
16-14327150	ENSG00000262454_MIR193BHG	Amnion	Male	up_sites	0.00713895	ncRNA_exonic	Alu-SINE
16-14327822	ENSG00000262454_MIR193BHG	Umbilical Cord	Male	up_sites	0.00612412	ncRNA_exonic	Alu-SINE
16-14329123	ENSG00000262454_MIR193BHG	Amnion	Male	up_sites	0.000794954	ncRNA_exonic	Alu-SINE
16-14329130	ENSG00000262454_MIR193BHG	Umbilical Cord	Male	up_sites	0.0254279	ncRNA_exonic	Alu-SINE
6-111271676	ENSG00000173214_MFSD4B	Villus of Fetal	Male	up_sites	0.0188615	UTR3	Alu-SINE
6-111271682	ENSG00000173214_MFSD4B	Chorionic Plate	Male	down_sites	0.00910937	UTR3	Alu-SINE
6-111275590	ENSG00000173214_MFSD4B	Villus of Maternal	Male	Han_sites	-	UTR3	Alu-SINE
1-39959775	ENSG00000168389_MFSD2A	Chorionic Plate	Male	down_sites	0.0331166	intronic	MIR-SINE
19-3540176	ENSG00000161091_MFSD12	Chorion	Male	up_sites	0.00611448	intronic	Alu-SINE
19-3541021	ENSG00000161091_MFSD12	Chorion	Male	up_sites	0.0204472	intronic	Alu-SINE
16-21640001	ENSG00000197006_METTL9	Amnion	Male	Han_sites	-	UTR3	Alu-SINE
16-21640015	ENSG00000197006_METTL9	Amnion	Male	Han_sites	-	UTR3	Alu-SINE
12-50931504	ENSG00000185432_METTL7A	Umbilical Cord	Male	up_sites	0.00576004	UTR3	Alu-SINE
12-50931636	ENSG00000185432_METTL7A	Umbilical Cord	Male	up_sites	3.43854e-05	UTR3	Alu-SINE
7-128503568	ENSG00000165055_METTL2B	Umbilical Cord	Male	up_sites	0.0135557	UTR3	Alu-SINE
7-128504976	ENSG00000165055_METTL2B	Chorion	Male	up_sites	0.0476544	UTR3	Alu-SINE
17-2417202	ENSG00000127804_METTL16	Umbilical Cord	Male	up_sites	0.0132799	UTR3	Alu-SINE
17-2417357	ENSG00000127804_METTL16	Umbilical Cord	Male	up_sites	0.00295099	UTR3	Alu-SINE
17-2418312	ENSG00000127804_METTL16	Chorion	Male	up_sites	0.00286146	UTR3	Alu-SINE
14-100835286	ENSG00000214548_MEG3	Chorionic Plate	Male	Han_sites	-	ncRNA_exonic	-
4-17627754	ENSG00000118579_MED28	Umbilical Cord	Male	up_sites	0.0181733	UTR3	Alu-SINE
4-17629112	ENSG00000118579_MED28	Villus of Maternal	Male	up_sites	0.025509	UTR3	Alu-SINE
1-28335812	ENSG00000130772_MED18	Chorion	Male	up_sites	0.00556471	UTR3	Alu-SINE
22-20573242	ENSG00000099917_MED15	Chorionic Plate	Male	down_sites	0.00328644	intronic	Alu-SINE
1-204555235	ENSG00000198625_MDM4	Chorionic Plate	Male	Han_sites	-	UTR3	Alu-SINE
1-204555738	ENSG00000198625_MDM4	Umbilical Cord	Male	up_sites	0.0101738	UTR3	Alu-SINE
1-204555822	ENSG00000198625_MDM4	Amnion	Male	up_sites	0.0403461	UTR3	Alu-SINE
1-204556656	ENSG00000198625_MDM4	Umbilical Cord	Male	up_sites	0.00528812	UTR3	Alu-SINE
6-13789155	ENSG00000050393_MCUR1	Villus of Fetal	Male	up_sites	0.0337984	UTR3	Alu-SINE
20-31547752	ENSG00000101898_MCTS2	Amnion	Male	Han_sites	-	synonymous	-
20-31547755	ENSG00000101898_MCTS2	Amnion	Male	Han_sites	-	synonymous	-
20-31547767	ENSG00000101898_MCTS2	Amnion	Male	Han_sites	-	synonymous	-
20-31547767	ENSG00000101898_MCTS2	Villus of Intermediate	Male	Han_sites	-	synonymous	-
20-31547806	ENSG00000101898_MCTS2	Amnion	Male	Han_sites	-	synonymous	-
20-31547806	ENSG00000101898_MCTS2	Chorion	Male	Han_sites	-	synonymous	-
20-31547827	ENSG00000101898_MCTS2	Amnion	Male	Han_sites	-	synonymous	-
8-47977549	ENSG00000104738_MCM4	Amnion	Male	up_sites	0.0191222	UTR3	Alu-SINE
21-46268922	ENSG00000160294_MCM3AP	Villus of Maternal	Male	up_sites	0.0397683	intronic	Alu-SINE
21-46269336	ENSG00000160294_MCM3AP	Chorion	Male	Han_sites	-	intronic	Alu-SINE
19-1582040	ENSG00000071655_MBD3	Villus of Fetal	Male	Han_sites	-	intronic	Alu-SINE
19-1587539	ENSG00000071655_MBD3	Villus of Fetal	Male	up_sites	0.00301582	intronic	Alu-SINE
20-3867511	ENSG00000088888_MAVS	Amnion	Male	up_sites	0.00576106	UTR3	Alu-SINE
20-3868433	ENSG00000088888_MAVS	Chorion	Male	up_sites	0.0320254	UTR3	Alu-SINE
20-3868448	ENSG00000088888_MAVS	Villus of Intermediate	Male	up_sites	0.0427578	UTR3	Alu-SINE
20-3868497	ENSG00000088888_MAVS	Amnion	Male	up_sites	0.000674213	UTR3	Alu-SINE
20-3868754	ENSG00000088888_MAVS	Umbilical Cord	Male	up_sites	0.00929471	UTR3	Alu-SINE
20-3868756	ENSG00000088888_MAVS	Amnion	Male	up_sites	0.00386003	UTR3	Alu-SINE
20-3868762	ENSG00000088888_MAVS	Amnion	Male	up_sites	0.00890104	UTR3	Alu-SINE
20-3869704	ENSG00000088888_MAVS	Chorion	Male	up_sites	0.00466615	UTR3	Alu-SINE
20-3869709	ENSG00000088888_MAVS	Chorion	Male	up_sites	0.0271516	UTR3	Alu-SINE
20-3869734	ENSG00000088888_MAVS	Chorion	Male	up_sites	0.00447834	UTR3	Alu-SINE
20-3872182	ENSG00000088888_MAVS	Amnion	Male	up_sites	0.0437837	UTR3	Alu-SINE
4-163933247	ENSG00000145416_MARCHF1	Villus of Intermediate	Male	Han_sites	-	intronic	-
2-39475362	ENSG00000231312_MAP4K3-DT	Umbilical Cord	Male	up_sites	0.040793	ncRNA_intronic	Alu-SINE
2-39477186	ENSG00000231312_MAP4K3-DT	Chorionic Plate	Male	up_sites	0.0370953	ncRNA_intronic	Alu-SINE
X-77828331	ENSG00000102158_MAGT1	Amnion	Male	up_sites	0.00578203	UTR3	Alu-SINE
10-101005028	ENSG00000107816_LZTS2	Villus of Intermediate	Male	up_sites	0.0302324	intronic	Alu-SINE
1-9927412	ENSG00000162441_LZIC	Amnion	Male	up_sites	0.0320567	UTR3	Alu-SINE
1-9927426	ENSG00000162441_LZIC	Amnion	Male	up_sites	0.0468663	UTR3	Alu-SINE
1-9927426	ENSG00000162441_LZIC	Chorionic Plate	Male	up_sites	0.0139405	UTR3	Alu-SINE
1-9927426	ENSG00000162441_LZIC	Villus of Maternal	Male	down_sites	0.00327336	UTR3	Alu-SINE
1-9927795	ENSG00000162441_LZIC	Villus of Fetal	Male	up_sites	0.0434899	UTR3	Alu-SINE
1-9927799	ENSG00000162441_LZIC	Chorion	Male	up_sites	0.0268379	UTR3	Alu-SINE
1-9927874	ENSG00000162441_LZIC	Amnion	Male	up_sites	0.0234748	UTR3	Alu-SINE
1-9927893	ENSG00000162441_LZIC	Amnion	Male	up_sites	0.0208647	UTR3	Alu-SINE
1-9927894	ENSG00000162441_LZIC	Amnion	Male	up_sites	0.0441547	UTR3	Alu-SINE
1-9928089	ENSG00000162441_LZIC	Amnion	Male	up_sites	0.000575166	UTR3	Alu-SINE
1-9928089	ENSG00000162441_LZIC	Chorionic Plate	Male	up_sites	0.0224642	UTR3	Alu-SINE
1-9928089	ENSG00000162441_LZIC	Umbilical Cord	Male	up_sites	0.0229916	UTR3	Alu-SINE
1-9928190	ENSG00000162441_LZIC	Villus of Intermediate	Male	down_sites	0.020165	UTR3	Alu-SINE
1-9928201	ENSG00000162441_LZIC	Amnion	Male	up_sites	0.0170486	UTR3	Alu-SINE
1-9928634	ENSG00000162441_LZIC	Amnion	Male	up_sites	0.0439236	UTR3	Alu-SINE
5-131201527	ENSG00000186687_LYRM7	Chorion	Male	Han_sites	-	UTR3	Alu-SINE
5-131201694	ENSG00000186687_LYRM7	Amnion	Male	up_sites	0.0102643	UTR3	Alu-SINE
5-131202383	ENSG00000186687_LYRM7	Umbilical Cord	Male	up_sites	0.00322879	UTR3	Alu-SINE
5-131202387	ENSG00000186687_LYRM7	Umbilical Cord	Male	up_sites	0.0325558	UTR3	Alu-SINE
5-131202443	ENSG00000186687_LYRM7	Amnion	Male	up_sites	0.0235159	UTR3	Alu-SINE
6-89634852	ENSG00000083099_LYRM2	Umbilical Cord	Male	up_sites	0.029637	UTR3	Alu-SINE
6-31672531	ENSG00000240053_LY6G5B	Amnion	Male	up_sites	0.00802694	UTR3	Alu-SINE
6-31673146	ENSG00000240053_LY6G5B	Amnion	Male	up_sites	0.0081059	UTR3	Alu-SINE
6-31673155	ENSG00000240053_LY6G5B	Chorion	Male	up_sites	0.0138915	UTR3	Alu-SINE
6-31673181	ENSG00000240053_LY6G5B	Amnion	Male	up_sites	0.0248376	UTR3	Alu-SINE
6-31673198	ENSG00000240053_LY6G5B	Amnion	Male	up_sites	0.00606879	UTR3	Alu-SINE
6-31673207	ENSG00000240053_LY6G5B	Amnion	Male	up_sites	0.0262525	UTR3	Alu-SINE
12-91106984	ENSG00000139329_LUM	Chorion	Male	up_sites	0.0297733	intronic	Alu-SINE
11-65549514	ENSG00000168056_LTBP3	Chorionic Plate	Male	up_sites	0.022466	intronic	Alu-SINE
11-65549861	ENSG00000168056_LTBP3	Villus of Fetal	Male	up_sites	0.00932537	intronic	Alu-SINE
11-62687035	ENSG00000177363_LRRN4CL	Chorion	Male	up_sites	0.0358066	UTR3	Alu-SINE
10-27248551	ENSG00000230445_LRRC37A6P	Chorionic Plate	Male	Han_sites	-	ncRNA_exonic	-
10-27248568	ENSG00000230445_LRRC37A6P	Villus of Fetal	Male	Han_sites	-	ncRNA_exonic	-
16-67373605	ENSG00000159708_LRRC36	Chorionic Plate	Male	up_sites	0.0365212	intronic	Alu-SINE
16-67373623	ENSG00000159708_LRRC36	Chorionic Plate	Male	up_sites	0.0174565	intronic	Alu-SINE
16-67374524	ENSG00000159708_LRRC36	Villus of Intermediate	Male	Tibetan_sites	-	intronic	Alu-SINE
16-67374670	ENSG00000159708_LRRC36	Villus of Fetal	Male	up_sites	0.0332853	intronic	Alu-SINE
6-149820961	ENSG00000120256_LRP11	Umbilical Cord	Male	up_sites	0.0255698	ncRNA_intronic	Alu-SINE
6-149821134	ENSG00000120256_LRP11	Amnion	Male	up_sites	0.00350997	ncRNA_intronic	Alu-SINE
6-149822103	ENSG00000120256_LRP11	Amnion	Male	up_sites	0.0196779	ncRNA_intronic	Alu-SINE
6-149822103	ENSG00000120256_LRP11	Chorion	Male	up_sites	0.00659142	ncRNA_intronic	Alu-SINE
6-149822299	ENSG00000120256_LRP11	Chorion	Male	up_sites	0.0019013	ncRNA_intronic	Alu-SINE
6-149822318	ENSG00000120256_LRP11	Chorionic Plate	Male	Han_sites	-	ncRNA_intronic	Alu-SINE
6-149825813	ENSG00000120256_LRP11	Amnion	Male	up_sites	0.0020349	ncRNA_intronic	Alu-SINE
6-149825900	ENSG00000120256_LRP11	Amnion	Male	up_sites	0.025202	ncRNA_intronic	Alu-SINE
3-197884177	ENSG00000186001_LRCH3	Chorion	Male	up_sites	0.000888914	UTR3	Alu-SINE
3-197884419	ENSG00000186001_LRCH3	Villus of Intermediate	Male	up_sites	0.0064747	UTR3	Alu-SINE
3-197885349	ENSG00000186001_LRCH3	Amnion	Male	up_sites	0.000682995	UTR3	Alu-SINE
3-197885396	ENSG00000186001_LRCH3	Amnion	Male	up_sites	0.0125267	UTR3	Alu-SINE
3-197885397	ENSG00000186001_LRCH3	Amnion	Male	up_sites	0.00170975	UTR3	Alu-SINE
3-197885489	ENSG00000186001_LRCH3	Chorion	Male	up_sites	0.00834064	UTR3	Alu-SINE
3-197885522	ENSG00000186001_LRCH3	Chorion	Male	up_sites	0.0286945	UTR3	Alu-SINE
3-197885531	ENSG00000186001_LRCH3	Amnion	Male	up_sites	0.025534	UTR3	Alu-SINE
3-197885531	ENSG00000186001_LRCH3	Villus of Fetal	Male	up_sites	0.0217037	UTR3	Alu-SINE
16-48353296	ENSG00000102910_LONP2	Amnion	Male	up_sites	0.0104398	UTR3	Alu-SINE
16-48353443	ENSG00000102910_LONP2	Chorion	Male	up_sites	0.0335033	UTR3	Alu-SINE
16-48354334	ENSG00000102910_LONP2	Amnion	Male	up_sites	0.031641	UTR3	Alu-SINE
16-48354334	ENSG00000102910_LONP2	Umbilical Cord	Male	up_sites	0.00636181	UTR3	Alu-SINE
16-48354471	ENSG00000102910_LONP2	Chorion	Male	up_sites	0.0245028	UTR3	Alu-SINE
16-48354483	ENSG00000102910_LONP2	Amnion	Male	up_sites	0.0221608	UTR3	Alu-SINE
X-150114986	ENSG00000183171_LOC643015	Chorionic Plate	Male	Han_sites	-	ncRNA_exonic	-
X-150115003	ENSG00000183171_LOC643015	Chorionic Plate	Male	Han_sites	-	ncRNA_exonic	-
15-89201430	ENSG00000259948_LOC124903574	Amnion	Male	up_sites	0.027823	ncRNA_exonic	-
15-89201452	ENSG00000259948_LOC124903574	Amnion	Male	up_sites	0.04006	ncRNA_exonic	-
15-89201741	ENSG00000259948_LOC124903574	Umbilical Cord	Male	up_sites	0.00478572	ncRNA_exonic	-
15-51913043	ENSG00000138594_LOC112268148	Amnion	Male	up_sites	0.0102455	UTR3	Alu-SINE
15-51913099	ENSG00000138594_LOC112268148	Amnion	Male	up_sites	0.0260723	UTR3	Alu-SINE
15-51913158	ENSG00000138594_LOC112268148	Chorion	Male	up_sites	0.0325331	UTR3	Alu-SINE
15-51913234	ENSG00000138594_LOC112268148	Villus of Fetal	Male	up_sites	0.0375267	UTR3	Alu-SINE
15-51913892	ENSG00000138594_LOC112268148	Amnion	Male	up_sites	0.00229678	UTR3	Alu-SINE
15-51914493	ENSG00000138594_LOC112268148	Villus of Intermediate	Male	up_sites	0.0184827	UTR3	Alu-SINE
4-76943066	ENSG00000289586_LOC105377294	Villus of Intermediate	Male	up_sites	0.0071307	ncRNA_intronic	Alu-SINE
16-89520477	ENSG00000197912_LOC101930112	Chorion	Male	down_sites	0.0369946	intronic	Alu-SINE
12-7439562	ENSG00000255836_LOC100419928	Villus of Intermediate	Male	down_sites	0.0316786	ncRNA_exonic	-
12-7439708	ENSG00000255836_LOC100419928	Chorion	Male	Han_sites	-	ncRNA_exonic	-
2-175924785	ENSG00000144320_LNPK	Amnion	Male	Tibetan_sites	-	UTR3	ERVL-MaLR-LTR
2-175926454	ENSG00000144320_LNPK	Amnion	Male	up_sites	0.048844	UTR3	ERVL-MaLR-LTR
3-45680563	ENSG00000144791_LIMD1	Amnion	Male	up_sites	0.0104033	ncRNA_intronic	Alu-SINE
3-45680889	ENSG00000144791_LIMD1	Amnion	Male	up_sites	0.016288	ncRNA_intronic	Alu-SINE
3-45680895	ENSG00000144791_LIMD1	Umbilical Cord	Male	up_sites	0.00047538	ncRNA_intronic	Alu-SINE
3-45680999	ENSG00000144791_LIMD1	Umbilical Cord	Male	up_sites	0.0274304	ncRNA_intronic	Alu-SINE
3-45681000	ENSG00000144791_LIMD1	Chorion	Male	up_sites	0.00192637	ncRNA_intronic	Alu-SINE
12-50203228	ENSG00000050405_LIMA1	Umbilical Cord	Male	up_sites	0.0187948	intronic	Alu-SINE
14-55135779	ENSG00000131981_LGALS3	Amnion	Male	up_sites	0.00654148	intronic	Alu-SINE
1-209622976	ENSG00000196878_LAMB3	Chorion	Male	down_sites	0.023308	intronic	-
22-20450911	ENSG00000099910_KLHL22	Villus of Fetal	Male	down_sites	0.0288827	ncRNA_exonic	-
22-20450984	ENSG00000099910_KLHL22	Villus of Fetal	Male	down_sites	0.0388171	ncRNA_exonic	-
22-20451010	ENSG00000099910_KLHL22	Villus of Fetal	Male	down_sites	0.01684	ncRNA_exonic	-
22-20451011	ENSG00000099910_KLHL22	Villus of Fetal	Male	down_sites	0.00459587	ncRNA_exonic	-
22-20451106	ENSG00000099910_KLHL22	Villus of Fetal	Male	down_sites	0.0447014	ncRNA_exonic	-
14-103681524	ENSG00000126214_KLC1	Amnion	Male	up_sites	0.0117076	intronic	Alu-SINE
14-103681576	ENSG00000126214_KLC1	Amnion	Male	up_sites	0.0176478	intronic	Alu-SINE
14-103682255	ENSG00000126214_KLC1	Amnion	Male	up_sites	0.033992	intronic	Alu-SINE
14-103682430	ENSG00000126214_KLC1	Chorion	Male	up_sites	0.034919	ncRNA_exonic	Alu-SINE
14-103682538	ENSG00000126214_KLC1	Amnion	Male	up_sites	0.00318103	ncRNA_exonic	Alu-SINE
14-103682554	ENSG00000126214_KLC1	Amnion	Male	up_sites	0.0437934	ncRNA_exonic	Alu-SINE
14-103682604	ENSG00000126214_KLC1	Amnion	Male	up_sites	0.0155955	ncRNA_exonic	Alu-SINE
17-5027797	ENSG00000129250_KIF1C	Amnion	Male	up_sites	0.0248481	UTR3	Alu-SINE
17-5027822	ENSG00000129250_KIF1C	Amnion	Male	up_sites	0.0373573	UTR3	Alu-SINE
3-44749132	ENSG00000163807_KIAA1143	Chorion	Male	up_sites	0.0259321	UTR3	Alu-SINE
3-44749281	ENSG00000163807_KIAA1143	Amnion	Male	up_sites	0.018311	UTR3	Alu-SINE
3-44749859	ENSG00000163807_KIAA1143	Amnion	Male	up_sites	0.00826483	UTR3	Alu-SINE
3-44749905	ENSG00000163807_KIAA1143	Chorionic Plate	Male	Han_sites	-	UTR3	Alu-SINE
3-179260422	ENSG00000171121_KCNMB3	Villus of Maternal	Male	Han_sites	-	ncRNA_exonic	-
3-179260444	ENSG00000171121_KCNMB3	Villus of Fetal	Male	Han_sites	-	ncRNA_exonic	-
3-179260875	ENSG00000171121_KCNMB3	Chorion	Male	Han_sites	-	ncRNA_exonic	-
3-179260887	ENSG00000171121_KCNMB3	Chorion	Male	Han_sites	-	ncRNA_exonic	-
3-156044857	ENSG00000169282_KCNAB1	Chorion	Male	Han_sites	-	ncRNA_exonic	-
15-34142900	ENSG00000134152_KATNBL1	Umbilical Cord	Male	up_sites	0.0081996	synonymous	Alu-SINE
15-34143731	ENSG00000134152_KATNBL1	Villus of Fetal	Male	up_sites	0.034261	intronic	Alu-SINE
15-34144809	ENSG00000134152_KATNBL1	Amnion	Male	up_sites	0.00906973	intronic	Alu-SINE
16-31122918	ENSG00000103510_KAT8	Chorionic Plate	Male	up_sites	0.0107034	ncRNA_intronic	Alu-SINE
16-31123108	ENSG00000103510_KAT8	Umbilical Cord	Male	up_sites	0.0217913	ncRNA_intronic	Alu-SINE
16-31123310	ENSG00000103510_KAT8	Umbilical Cord	Male	up_sites	0.000277757	ncRNA_intronic	Alu-SINE
16-31123786	ENSG00000103510_KAT8	Amnion	Male	up_sites	0.0204892	ncRNA_exonic	Alu-SINE
12-43788679	ENSG00000198001_IRAK4	Umbilical Cord	Male	up_sites	0.0179477	UTR3	Alu-SINE
1-45697470	ENSG00000197429_IPP	Chorion	Male	up_sites	0.00281052	intronic	Alu-SINE
1-45697471	ENSG00000197429_IPP	Villus of Intermediate	Male	down_sites	0.0131624	intronic	Alu-SINE
1-45697524	ENSG00000197429_IPP	Umbilical Cord	Male	down_sites	0.0331502	intronic	Alu-SINE
13-51460975	ENSG00000236778_INTS6-AS1	Amnion	Male	Han_sites	-	ncRNA_exonic	-
7-6606846	ENSG00000146576_INTS15	Villus of Maternal	Male	up_sites	0.0325331	intronic	Alu-SINE
7-6606898	ENSG00000146576_INTS15	Villus of Intermediate	Male	down_sites	0.024898	intronic	Alu-SINE
1-1316230	ENSG00000127054_INTS11	Chorion	Male	up_sites	0.0321432	intronic	Alu-SINE
1-1316464	ENSG00000127054_INTS11	Amnion	Male	up_sites	0.035544	intronic	Alu-SINE
1-1317164	ENSG00000127054_INTS11	Umbilical Cord	Male	up_sites	0.0161562	intronic	Alu-SINE
1-1317934	ENSG00000127054_INTS11	Amnion	Male	up_sites	0.0097386	ncRNA_intronic	Alu-SINE
1-1318006	ENSG00000127054_INTS11	Chorion	Male	up_sites	0.0190536	ncRNA_intronic	Alu-SINE
9-112684445	ENSG00000148153_INIP	Amnion	Male	up_sites	0.0064457	UTR3	Alu-SINE
9-112684505	ENSG00000148153_INIP	Umbilical Cord	Male	up_sites	0.00916324	UTR3	Alu-SINE
9-112685238	ENSG00000148153_INIP	Amnion	Male	up_sites	0.0492808	UTR3	Alu-SINE
22-17113215	ENSG00000177663_IL17RA	Amnion	Male	Han_sites	-	UTR3	Alu-SINE
16-21640001	ENSG00000140749_IGSF6	Amnion	Male	Han_sites	-	UTR3	Alu-SINE
16-21640015	ENSG00000140749_IGSF6	Amnion	Male	Han_sites	-	UTR3	Alu-SINE
11-2129619	ENSG00000167244_IGF2	Amnion	Male	Han_sites	-	ncRNA_intronic	-
21-33263899	ENSG00000249624_IFNAR2	Umbilical Cord	Male	up_sites	0.00771335	ncRNA_exonic	Alu-SINE
21-33263955	ENSG00000249624_IFNAR2	Chorion	Male	up_sites	0.00782803	ncRNA_exonic	Alu-SINE
21-33264783	ENSG00000249624_IFNAR2	Villus of Maternal	Male	up_sites	0.0108665	ncRNA_exonic	Alu-SINE
21-33263899	ENSG00000159110_IFNAR2	Umbilical Cord	Male	up_sites	0.00771335	ncRNA_exonic	Alu-SINE
21-33263955	ENSG00000159110_IFNAR2	Chorion	Male	up_sites	0.00782803	ncRNA_exonic	Alu-SINE
21-33264783	ENSG00000159110_IFNAR2	Villus of Maternal	Male	up_sites	0.0108665	ncRNA_exonic	Alu-SINE
21-33357628	ENSG00000142166_IFNAR1	Amnion	Male	up_sites	0.0396632	UTR3	Alu-SINE
21-33357653	ENSG00000142166_IFNAR1	Amnion	Male	up_sites	0.0289508	UTR3	Alu-SINE
21-33357789	ENSG00000142166_IFNAR1	Amnion	Male	up_sites	0.0264107	UTR3	Alu-SINE
21-33357790	ENSG00000142166_IFNAR1	Villus of Maternal	Male	up_sites	0.0405385	UTR3	Alu-SINE
8-39971909	ENSG00000188676_IDO2	Villus of Intermediate	Male	Han_sites	-	ncRNA_intronic	Alu-SINE
8-39985114	ENSG00000188676_IDO2	Villus of Intermediate	Male	up_sites	0.0228313	ncRNA_intronic	Alu-SINE
1-6222385	ENSG00000116237_ICMT	Chorion	Male	Han_sites	-	UTR3	Alu-SINE
1-6223245	ENSG00000116237_ICMT	Umbilical Cord	Male	up_sites	0.00626749	UTR3	Alu-SINE
8-38979779	ENSG00000169495_HTRA4	Chorionic Plate	Male	Han_sites	-	intronic	Alu-SINE
4-83294171	ENSG00000173083_HPSE	Villus of Fetal	Male	down_sites	0.0451218	UTR3	Alu-SINE
1-20774876	ENSG00000127483_HP1BP3	Umbilical Cord	Male	up_sites	0.0135353	UTR5	Alu-SINE
8-43020843	ENSG00000168172_HOOK3	Chorion	Male	up_sites	0.0293219	UTR3	Alu-SINE
8-43020981	ENSG00000168172_HOOK3	Villus of Fetal	Male	up_sites	0.0136827	UTR3	Alu-SINE
8-43021749	ENSG00000168172_HOOK3	Umbilical Cord	Male	up_sites	0.0145314	UTR3	Alu-SINE
8-43023091	ENSG00000168172_HOOK3	Umbilical Cord	Male	up_sites	0.00371845	UTR3	Alu-SINE
20-31547752	ENSG00000101294_HM13	Amnion	Male	Han_sites	-	synonymous	-
20-31547755	ENSG00000101294_HM13	Amnion	Male	Han_sites	-	synonymous	-
20-31547767	ENSG00000101294_HM13	Amnion	Male	Han_sites	-	synonymous	-
20-31547767	ENSG00000101294_HM13	Villus of Intermediate	Male	Han_sites	-	synonymous	-
20-31547806	ENSG00000101294_HM13	Amnion	Male	Han_sites	-	synonymous	-
20-31547806	ENSG00000101294_HM13	Chorion	Male	Han_sites	-	synonymous	-
20-31547827	ENSG00000101294_HM13	Amnion	Male	Han_sites	-	synonymous	-
6-33005440	ENSG00000204252_HLA-DOA	Chorion	Male	Han_sites	-	UTR3	Alu-SINE
5-131159990	ENSG00000169567_HINT1	Amnion	Male	up_sites	0.0231651	UTR3	Alu-SINE
5-131201527	ENSG00000169567_HINT1	Chorion	Male	Han_sites	-	UTR3	Alu-SINE
5-131201694	ENSG00000169567_HINT1	Amnion	Male	up_sites	0.0102643	UTR3	Alu-SINE
5-131202383	ENSG00000169567_HINT1	Umbilical Cord	Male	up_sites	0.00322879	UTR3	Alu-SINE
5-131202387	ENSG00000169567_HINT1	Umbilical Cord	Male	up_sites	0.0325558	UTR3	Alu-SINE
5-131202443	ENSG00000169567_HINT1	Amnion	Male	up_sites	0.0235159	UTR3	Alu-SINE
7-128457726	ENSG00000135245_HILPDA	Umbilical Cord	Male	Tibetan_sites	-	ncRNA_intronic	Alu-SINE
19-46313360	ENSG00000124440_HIF3A	Umbilical Cord	Male	Han_sites	-	intronic	Alu-SINE
19-46316601	ENSG00000124440_HIF3A	Umbilical Cord	Male	up_sites	0.0309834	intronic	Alu-SINE
19-46317164	ENSG00000124440_HIF3A	Umbilical Cord	Male	Tibetan_sites	-	intronic	Alu-SINE
19-46336919	ENSG00000124440_HIF3A	Umbilical Cord	Male	up_sites	0.00889136	ncRNA_intronic	Alu-SINE
6-26095240	ENSG00000010704_HFE	Chorion	Male	up_sites	0.0107312	UTR3	Alu-SINE
6-26095289	ENSG00000010704_HFE	Chorion	Male	up_sites	0.0373674	UTR3	Alu-SINE
6-26095414	ENSG00000010704_HFE	Umbilical Cord	Male	up_sites	0.022077	UTR3	Alu-SINE
6-26096234	ENSG00000010704_HFE	Villus of Maternal	Male	down_sites	0.0367879	UTR3	Alu-SINE
6-26096396	ENSG00000010704_HFE	Chorionic Plate	Male	up_sites	0.00909138	UTR3	Alu-SINE
6-26096408	ENSG00000010704_HFE	Chorionic Plate	Male	up_sites	0.000447382	UTR3	Alu-SINE
6-138412688	ENSG00000051620_HEBP2	Amnion	Male	Tibetan_sites	-	intronic	Alu-SINE
16-50105833	ENSG00000155393_HEATR3	Villus of Intermediate	Male	down_sites	0.0435075	ncRNA_intronic	Alu-SINE
16-9110970	ENSG00000182831_HAPSTR1	Chorion	Male	up_sites	0.0165399	ncRNA_exonic	Alu-SINE
6-26095240	ENSG00000180596_H2BC4	Chorion	Male	up_sites	0.0107312	UTR3	Alu-SINE
6-26095289	ENSG00000180596_H2BC4	Chorion	Male	up_sites	0.0373674	UTR3	Alu-SINE
6-26095414	ENSG00000180596_H2BC4	Umbilical Cord	Male	up_sites	0.022077	UTR3	Alu-SINE
6-26096234	ENSG00000180596_H2BC4	Villus of Maternal	Male	down_sites	0.0367879	UTR3	Alu-SINE
6-26096396	ENSG00000180596_H2BC4	Chorionic Plate	Male	up_sites	0.00909138	UTR3	Alu-SINE
6-26096408	ENSG00000180596_H2BC4	Chorionic Plate	Male	up_sites	0.000447382	UTR3	Alu-SINE
7-44832820	ENSG00000105968_H2AZ2	Amnion	Male	up_sites	0.0111328	UTR3	Alu-SINE
7-44832828	ENSG00000105968_H2AZ2	Amnion	Male	up_sites	0.0100596	UTR3	Alu-SINE
7-44832828	ENSG00000105968_H2AZ2	Villus of Maternal	Male	up_sites	0.0147916	UTR3	Alu-SINE
7-44832874	ENSG00000105968_H2AZ2	Amnion	Male	up_sites	0.0427729	UTR3	Alu-SINE
7-44832906	ENSG00000105968_H2AZ2	Chorionic Plate	Male	up_sites	0.0186405	UTR3	Alu-SINE
7-44833499	ENSG00000105968_H2AZ2	Chorion	Male	up_sites	0.0216247	UTR3	Alu-SINE
7-44833507	ENSG00000105968_H2AZ2	Chorionic Plate	Male	up_sites	0.0399234	UTR3	Alu-SINE
22-38723136	ENSG00000100226_GTPBP1	Villus of Intermediate	Male	down_sites	0.0132277	ncRNA_exonic	-
22-38723309	ENSG00000100226_GTPBP1	Villus of Maternal	Male	up_sites	0.0273379	ncRNA_exonic	-
7-73165791	ENSG00000233369_GTF2IP4	Villus of Maternal	Male	up_sites	0.00465072	ncRNA_intronic	Alu-SINE
7-74685311	ENSG00000263001_GTF2I	Villus of Fetal	Male	up_sites	0.0419118	intronic	Alu-SINE
7-74686992	ENSG00000263001_GTF2I	Villus of Maternal	Male	up_sites	0.0175437	intronic	Alu-SINE
7-74687073	ENSG00000263001_GTF2I	Villus of Intermediate	Male	up_sites	0.0205899	intronic	Alu-SINE
12-123661548	ENSG00000111358_GTF2H3	Villus of Maternal	Male	up_sites	0.00697426	UTR3	Alu-SINE
8-30678463	ENSG00000104687_GSR	Villus of Intermediate	Male	down_sites	0.00371575	UTR3	Alu-SINE
17-39919842	ENSG00000073605_GSDMB	Amnion	Male	up_sites	0.0108665	intergenic	Alu-SINE
22-25649044	ENSG00000100077_GRK3	Villus of Maternal	Male	Han_sites	-	ncRNA_exonic	-
12-66892845	ENSG00000155974_GRIP1	Villus of Maternal	Male	up_sites	0.0134106	intronic	Alu-SINE
4-8564041	ENSG00000155269_GPR78	Chorionic Plate	Male	Han_sites	-	intergenic	Alu-SINE
1-9101172	ENSG00000180758_GPR157	Chorion	Male	up_sites	0.0425378	UTR3	Alu-SINE
1-9101274	ENSG00000180758_GPR157	Chorion	Male	up_sites	0.000259802	UTR3	Alu-SINE
1-26878733	ENSG00000142751_GPN2	Chorion	Male	up_sites	0.0407748	UTR3	Alu-SINE
13-45031106	ENSG00000133114_GPALPP1	Umbilical Cord	Male	down_sites	0.0145593	ncRNA_intronic	Alu-SINE
1-155750833	ENSG00000116580_GON4L	Umbilical Cord	Male	up_sites	0.0338858	intronic	Alu-SINE
1-155750864	ENSG00000116580_GON4L	Chorion	Male	up_sites	0.0273881	intronic	Alu-SINE
1-155751399	ENSG00000116580_GON4L	Umbilical Cord	Male	Han_sites	-	intronic	Alu-SINE
1-155751407	ENSG00000116580_GON4L	Umbilical Cord	Male	Han_sites	-	intronic	Alu-SINE
12-132770861	ENSG00000090615_GOLGA3	Umbilical Cord	Male	up_sites	0.0100002	UTR3	Alu-SINE
1-145921979	ENSG00000211451_GNRHR2	Amnion	Male	up_sites	0.00592369	ncRNA_intronic	Alu-SINE
1-145922969	ENSG00000211451_GNRHR2	Chorion	Male	up_sites	0.0414142	ncRNA_intronic	Alu-SINE
14-52775933	ENSG00000100522_GNPNAT1	Amnion	Male	up_sites	0.0128791	ncRNA_exonic	Alu-SINE
14-52775933	ENSG00000100522_GNPNAT1	Chorion	Male	up_sites	0.0158231	ncRNA_exonic	Alu-SINE
14-52776688	ENSG00000100522_GNPNAT1	Chorion	Male	up_sites	0.016621	ncRNA_intronic	Alu-SINE
14-52776693	ENSG00000100522_GNPNAT1	Amnion	Male	up_sites	0.0106465	ncRNA_intronic	Alu-SINE
14-52776827	ENSG00000100522_GNPNAT1	Umbilical Cord	Male	up_sites	0.0391738	ncRNA_intronic	Alu-SINE
X-54560763	ENSG00000130119_GNL3L	Amnion	Male	up_sites	0.0153416	UTR3	Alu-SINE
X-54562673	ENSG00000130119_GNL3L	Chorionic Plate	Male	up_sites	0.00437933	UTR3	Alu-SINE
X-54562686	ENSG00000130119_GNL3L	Umbilical Cord	Male	up_sites	0.040264	UTR3	Alu-SINE
X-54562750	ENSG00000130119_GNL3L	Umbilical Cord	Male	up_sites	0.0142038	UTR3	Alu-SINE
X-54563555	ENSG00000130119_GNL3L	Amnion	Male	up_sites	0.00472328	UTR3	Alu-SINE
X-54563555	ENSG00000130119_GNL3L	Chorionic Plate	Male	up_sites	0.017374	UTR3	Alu-SINE
X-54563582	ENSG00000130119_GNL3L	Chorion	Male	up_sites	0.0260128	UTR3	Alu-SINE
X-54563593	ENSG00000130119_GNL3L	Umbilical Cord	Male	up_sites	0.0470252	UTR3	Alu-SINE
X-54564507	ENSG00000130119_GNL3L	Villus of Maternal	Male	Han_sites	-	UTR3	Alu-SINE
X-54564508	ENSG00000130119_GNL3L	Chorionic Plate	Male	up_sites	0.0224023	UTR3	Alu-SINE
X-54564834	ENSG00000130119_GNL3L	Chorion	Male	up_sites	0.0116262	UTR3	Alu-SINE
9-36215080	ENSG00000159921_GNE	Chorionic Plate	Male	up_sites	0.0238846	UTR3	Alu-SINE
9-36215301	ENSG00000159921_GNE	Amnion	Male	up_sites	0.0113662	UTR3	Alu-SINE
9-36216702	ENSG00000159921_GNE	Umbilical Cord	Male	up_sites	0.00723617	UTR3	Alu-SINE
3-179398270	ENSG00000114450_GNB4	Umbilical Cord	Male	up_sites	0.0200559	ncRNA_intronic	Alu-SINE
9-128517222	ENSG00000119392_GLE1	Chorionic Plate	Male	Han_sites	-	intronic	Alu-SINE
17-44800253	ENSG00000182963_GJC1	Umbilical Cord	Male	up_sites	0.013631	UTR3	Alu-SINE
17-44801110	ENSG00000182963_GJC1	Umbilical Cord	Male	down_sites	0.0349962	UTR3	Alu-SINE
17-44801689	ENSG00000182963_GJC1	Villus of Fetal	Male	up_sites	0.00943261	UTR3	Alu-SINE
19-14489209	ENSG00000123159_GIPC1	Amnion	Male	up_sites	0.0430206	intronic	Alu-SINE
19-14489425	ENSG00000123159_GIPC1	Amnion	Male	Han_sites	-	ncRNA_exonic	-
22-24573003	ENSG00000286070_GGT1	Umbilical Cord	Male	up_sites	0.000627492	UTR3	Alu-SINE
22-24573015	ENSG00000286070_GGT1	Villus of Intermediate	Male	Han_sites	-	UTR3	Alu-SINE
22-24573832	ENSG00000286070_GGT1	Amnion	Male	up_sites	0.00059865	UTR3	Alu-SINE
2-85546253	ENSG00000115486_GGCX	Amnion	Male	up_sites	0.0141532	UTR3	Alu-SINE
2-85546371	ENSG00000115486_GGCX	Chorionic Plate	Male	up_sites	0.00548428	UTR3	Alu-SINE
16-23465260	ENSG00000103365_GGA2	Amnion	Male	up_sites	0.0135918	UTR3	Alu-SINE
1-89183686	ENSG00000162654_GBP4	Villus of Intermediate	Male	up_sites	0.00430141	UTR3	Alu-SINE
1-89183696	ENSG00000162654_GBP4	Villus of Intermediate	Male	up_sites	0.0116728	UTR3	Alu-SINE
10-102362665	ENSG00000107862_GBF1	Amnion	Male	Han_sites	-	non-synonymous;splicing	-
11-778864	ENSG00000255284_GATD1-DT	Chorionic Plate	Male	up_sites	0.00898887	ncRNA_intronic	Alu-SINE
11-767886	ENSG00000177225_GATD1	Chorion	Male	up_sites	0.00246979	UTR3	Alu-SINE
11-767947	ENSG00000177225_GATD1	Chorion	Male	up_sites	0.0103894	UTR3	Alu-SINE
11-767966	ENSG00000177225_GATD1	Chorion	Male	up_sites	0.0030623	UTR3	Alu-SINE
11-767989	ENSG00000177225_GATD1	Villus of Maternal	Male	down_sites	0.0140932	UTR3	Alu-SINE
11-768303	ENSG00000177225_GATD1	Chorionic Plate	Male	up_sites	0.0184694	UTR3	Alu-SINE
11-768321	ENSG00000177225_GATD1	Chorion	Male	up_sites	0.0349169	UTR3	Alu-SINE
11-768347	ENSG00000177225_GATD1	Chorionic Plate	Male	up_sites	0.00265962	UTR3	Alu-SINE
11-768347	ENSG00000177225_GATD1	Umbilical Cord	Male	up_sites	0.0274596	UTR3	Alu-SINE
11-768383	ENSG00000177225_GATD1	Chorionic Plate	Male	up_sites	0.0178677	UTR3	Alu-SINE
11-768393	ENSG00000177225_GATD1	Umbilical Cord	Male	up_sites	0.0390345	UTR3	Alu-SINE
11-768609	ENSG00000177225_GATD1	Umbilical Cord	Male	up_sites	0.0389898	UTR3	Alu-SINE
11-769581	ENSG00000177225_GATD1	Chorion	Male	up_sites	0.00860652	UTR3	Alu-SINE
11-769738	ENSG00000177225_GATD1	Chorion	Male	up_sites	0.0469257	UTR3	Alu-SINE
11-769883	ENSG00000177225_GATD1	Chorionic Plate	Male	Han_sites	-	UTR3	Alu-SINE
12-120461272	ENSG00000257218_GATC	Umbilical Cord	Male	up_sites	0.0183779	UTR3	Alu-SINE
10-73776264	ENSG00000196968_FUT11	Chorion	Male	Han_sites	-	downstream	Alu-SINE
10-73776414	ENSG00000196968_FUT11	Amnion	Male	up_sites	0.0211501	downstream	Alu-SINE
10-73776527	ENSG00000196968_FUT11	Umbilical Cord	Male	up_sites	0.000450743	downstream	Alu-SINE
10-73776542	ENSG00000196968_FUT11	Amnion	Male	up_sites	0.0011827	downstream	Alu-SINE
10-73776542	ENSG00000196968_FUT11	Villus of Fetal	Male	up_sites	0.0311656	downstream	Alu-SINE
10-73778381	ENSG00000196968_FUT11	Amnion	Male	up_sites	0.00564451	intergenic	Alu-SINE
10-73778381	ENSG00000196968_FUT11	Villus of Fetal	Male	up_sites	0.0314202	intergenic	Alu-SINE
10-73778382	ENSG00000196968_FUT11	Amnion	Male	up_sites	0.0025572	intergenic	Alu-SINE
X-74278691	ENSG00000230590_FTX	Villus of Maternal	Male	Han_sites	-	ncRNA_exonic	Alu-SINE
20-28582327	ENSG00000282826_FRG1CP	Umbilical Cord	Male	down_sites	0.0336824	ncRNA_exonic	Alu-SINE
17-82577305	ENSG00000141568_FOXK2	Villus of Intermediate	Male	up_sites	0.0291919	ncRNA_exonic	-
17-82626021	ENSG00000141568_FOXK2	Amnion	Male	Han_sites	-	intronic	Alu-SINE
17-82628060	ENSG00000141568_FOXK2	Villus of Fetal	Male	up_sites	0.0365809	intronic	Alu-SINE
2-215371785	ENSG00000115414_FN1	Amnion	Male	up_sites	0.00759109	intronic	Alu-SINE
17-45217282	ENSG00000267121_FMNL1-DT	Villus of Fetal	Male	down_sites	0.0241896	ncRNA_exonic	Alu-SINE
17-45217352	ENSG00000267121_FMNL1-DT	Chorionic Plate	Male	down_sites	0.0415505	ncRNA_exonic	Alu-SINE
13-28369266	ENSG00000102755_FLT1	Chorionic Plate	Male	Han_sites	-	intronic	Alu-SINE
13-28369442	ENSG00000102755_FLT1	Chorionic Plate	Male	down_sites	0.0299608	intronic	Alu-SINE
13-28369489	ENSG00000102755_FLT1	Chorionic Plate	Male	down_sites	0.0206738	intronic	Alu-SINE
3-58140709	ENSG00000136068_FLNB	Amnion	Male	up_sites	0.013422	intronic	Alu-SINE
3-58140879	ENSG00000136068_FLNB	Amnion	Male	up_sites	0.00505267	intronic	Alu-SINE
3-58141132	ENSG00000136068_FLNB	Amnion	Male	up_sites	0.000779499	intronic	Alu-SINE
3-58141162	ENSG00000136068_FLNB	Amnion	Male	up_sites	0.00790993	intronic	Alu-SINE
X-131795803	ENSG00000213468_FIRRE	Chorionic Plate	Male	up_sites	0.00209395	ncRNA_exonic	-
X-131795856	ENSG00000213468_FIRRE	Chorionic Plate	Male	up_sites	0.0131222	ncRNA_exonic	-
3-14944603	ENSG00000225733_FGD5-AS1	Amnion	Male	up_sites	0.0185899	ncRNA_exonic	Alu-SINE
3-14944630	ENSG00000225733_FGD5-AS1	Amnion	Male	up_sites	0.0280739	ncRNA_exonic	Alu-SINE
14-74735670	ENSG00000119616_FCF1	Amnion	Male	up_sites	0.000275688	UTR3	Alu-SINE
14-74735709	ENSG00000119616_FCF1	Amnion	Male	up_sites	0.00656805	UTR3	Alu-SINE
14-74736031	ENSG00000119616_FCF1	Chorion	Male	up_sites	0.00111492	UTR3	Alu-SINE
14-74736291	ENSG00000119616_FCF1	Umbilical Cord	Male	up_sites	0.0222209	UTR3	Alu-SINE
14-74736292	ENSG00000119616_FCF1	Amnion	Male	up_sites	0.0187909	UTR3	Alu-SINE
14-74736292	ENSG00000119616_FCF1	Umbilical Cord	Male	up_sites	0.00189238	UTR3	Alu-SINE
14-74736301	ENSG00000119616_FCF1	Amnion	Male	up_sites	0.0155756	UTR3	Alu-SINE
12-117029775	ENSG00000174989_FBXW8	Villus of Maternal	Male	up_sites	0.0105718	UTR3	Alu-SINE
12-117029848	ENSG00000174989_FBXW8	Villus of Maternal	Male	up_sites	0.0407843	UTR3	Alu-SINE
22-23264129	ENSG00000230701_FBXW4P1	Chorionic Plate	Male	down_sites	0.00283884	ncRNA_exonic	-
21-31627240	ENSG00000230870_FBXW11P1	Chorionic Plate	Male	down_sites	0.035169	ncRNA_exonic	-
21-31627240	ENSG00000230870_FBXW11P1	Villus of Maternal	Male	down_sites	0.0042158	ncRNA_exonic	-
14-55367486	ENSG00000178974_FBXO34	Amnion	Male	up_sites	0.0249163	UTR3	Alu-SINE
14-55367486	ENSG00000178974_FBXO34	Chorion	Male	up_sites	0.00182182	UTR3	Alu-SINE
14-55367486	ENSG00000178974_FBXO34	Chorionic Plate	Male	up_sites	0.0027617	UTR3	Alu-SINE
14-55367498	ENSG00000178974_FBXO34	Villus of Maternal	Male	up_sites	0.00824762	UTR3	Alu-SINE
14-55367499	ENSG00000178974_FBXO34	Amnion	Male	up_sites	0.0118021	UTR3	Alu-SINE
14-55367499	ENSG00000178974_FBXO34	Chorion	Male	up_sites	0.00655646	UTR3	Alu-SINE
14-55367499	ENSG00000178974_FBXO34	Chorionic Plate	Male	up_sites	0.0243309	UTR3	Alu-SINE
14-55367499	ENSG00000178974_FBXO34	Villus of Maternal	Male	up_sites	0.00170972	UTR3	Alu-SINE
14-55367526	ENSG00000178974_FBXO34	Chorion	Male	up_sites	0.0247869	UTR3	Alu-SINE
14-55367526	ENSG00000178974_FBXO34	Villus of Maternal	Male	up_sites	0.0252605	UTR3	Alu-SINE
14-55367578	ENSG00000178974_FBXO34	Chorion	Male	up_sites	0.0115925	UTR3	Alu-SINE
14-55367578	ENSG00000178974_FBXO34	Villus of Intermediate	Male	up_sites	0.00413334	UTR3	Alu-SINE
14-55367600	ENSG00000178974_FBXO34	Umbilical Cord	Male	up_sites	0.00939551	UTR3	Alu-SINE
14-55367643	ENSG00000178974_FBXO34	Villus of Fetal	Male	up_sites	0.0108642	UTR3	Alu-SINE
14-55368248	ENSG00000178974_FBXO34	Villus of Fetal	Male	up_sites	0.00511913	UTR3	Alu-SINE
14-55368402	ENSG00000178974_FBXO34	Amnion	Male	up_sites	0.0233682	UTR3	Alu-SINE
14-55368515	ENSG00000178974_FBXO34	Amnion	Male	up_sites	0.0241896	UTR3	Alu-SINE
16-30920491	ENSG00000260852_FBXL19-AS1	Villus of Intermediate	Male	up_sites	0.0166915	ncRNA_exonic	Alu-SINE
14-91871653	ENSG00000140092_FBLN5	Umbilical Cord	Male	up_sites	0.0292376	intronic	Alu-SINE
2-33584227	ENSG00000119812_FAM98A	Amnion	Male	Tibetan_sites	-	UTR3	-
2-33584227	ENSG00000119812_FAM98A	Chorionic Plate	Male	Tibetan_sites	-	UTR3	-
2-33584227	ENSG00000119812_FAM98A	Umbilical Cord	Male	Tibetan_sites	-	UTR3	-
2-33584227	ENSG00000119812_FAM98A	Villus of Fetal	Male	Tibetan_sites	-	UTR3	-
2-33584227	ENSG00000119812_FAM98A	Villus of Intermediate	Male	Tibetan_sites	-	UTR3	-
2-33584227	ENSG00000119812_FAM98A	Villus of Maternal	Male	Tibetan_sites	-	UTR3	-
4-3948699	ENSG00000251669_FAM86EP	Villus of Maternal	Male	up_sites	0.0385603	ncRNA_intronic	Alu-SINE
1-179073347	ENSG00000116199_FAM20B	Amnion	Male	up_sites	0.00348766	UTR3	Alu-SINE
1-179073377	ENSG00000116199_FAM20B	Amnion	Male	up_sites	0.0189024	UTR3	Alu-SINE
1-179073409	ENSG00000116199_FAM20B	Amnion	Male	up_sites	0.0125526	UTR3	Alu-SINE
1-179073409	ENSG00000116199_FAM20B	Villus of Maternal	Male	up_sites	0.00101719	UTR3	Alu-SINE
1-179073415	ENSG00000116199_FAM20B	Amnion	Male	up_sites	0.0128072	UTR3	Alu-SINE
1-179073416	ENSG00000116199_FAM20B	Amnion	Male	up_sites	0.0467674	UTR3	Alu-SINE
1-179073445	ENSG00000116199_FAM20B	Amnion	Male	up_sites	0.00436108	UTR3	Alu-SINE
1-179073455	ENSG00000116199_FAM20B	Amnion	Male	up_sites	0.016621	UTR3	Alu-SINE
1-179074965	ENSG00000116199_FAM20B	Chorionic Plate	Male	up_sites	0.00253971	UTR3	Alu-SINE
1-179075046	ENSG00000116199_FAM20B	Amnion	Male	up_sites	0.0200752	UTR3	Alu-SINE
1-179075061	ENSG00000116199_FAM20B	Chorionic Plate	Male	up_sites	0.0235621	UTR3	Alu-SINE
1-179075061	ENSG00000116199_FAM20B	Villus of Fetal	Male	up_sites	0.0295127	UTR3	Alu-SINE
1-179075107	ENSG00000116199_FAM20B	Amnion	Male	up_sites	0.0400341	UTR3	Alu-SINE
1-160995524	ENSG00000158769_F11R	Chorion	Male	up_sites	0.00345403	UTR3	Alu-SINE
1-160998026	ENSG00000158769_F11R	Amnion	Male	up_sites	0.0206185	UTR3	Alu-SINE
1-160998100	ENSG00000158769_F11R	Amnion	Male	up_sites	0.00224081	UTR3	Alu-SINE
16-70249335	ENSG00000223496_EXOSC6	Villus of Maternal	Male	up_sites	0.0198018	UTR3	Alu-SINE
9-130704410	ENSG00000130713_EXOSC2	Umbilical Cord	Male	up_sites	0.00941865	UTR3	Alu-SINE
15-76230608	ENSG00000140374_ETFA	Villus of Intermediate	Male	up_sites	0.0184745	intronic	Alu-SINE
7-158738646	ENSG00000117868_ESYT2	Villus of Fetal	Male	down_sites	0.022643	intronic	Alu-SINE
7-158738646	ENSG00000117868_ESYT2	Villus of Intermediate	Male	down_sites	0.0183496	intronic	Alu-SINE
12-132126692	ENSG00000185684_EP400P1	Villus of Fetal	Male	down_sites	0.0388189	ncRNA_exonic	-
X-150114986	ENSG00000235703_EOLA2-DT	Chorionic Plate	Male	Han_sites	-	ncRNA_exonic	-
X-150115003	ENSG00000235703_EOLA2-DT	Chorionic Plate	Male	Han_sites	-	ncRNA_exonic	-
1-236484196	ENSG00000244457_ENO1P1	Villus of Maternal	Male	Han_sites	-	ncRNA_exonic	-
10-117485758	ENSG00000229847_EMX2OS	Umbilical Cord	Male	up_sites	0.00373858	ncRNA_exonic	Alu-SINE
16-10529893	ENSG00000213853_EMP2	Amnion	Male	up_sites	0.0100833	ncRNA_intronic	Alu-SINE
16-10531468	ENSG00000213853_EMP2	Amnion	Male	up_sites	0.00566573	ncRNA_intronic	Alu-SINE
16-10531469	ENSG00000213853_EMP2	Amnion	Male	up_sites	0.00538345	ncRNA_intronic	Alu-SINE
16-10531549	ENSG00000213853_EMP2	Amnion	Male	up_sites	0.0064658	ncRNA_intronic	Alu-SINE
16-10531557	ENSG00000213853_EMP2	Amnion	Male	up_sites	0.0160955	ncRNA_intronic	Alu-SINE
1-19215816	ENSG00000230424_EMC1-AS1	Villus of Maternal	Male	up_sites	0.0120794	ncRNA_intronic	Alu-SINE
1-19215964	ENSG00000230424_EMC1-AS1	Villus of Intermediate	Male	up_sites	0.0274889	ncRNA_intronic	Alu-SINE
1-19215969	ENSG00000230424_EMC1-AS1	Villus of Intermediate	Male	up_sites	0.0353508	ncRNA_intronic	Alu-SINE
1-19216127	ENSG00000230424_EMC1-AS1	Chorion	Male	up_sites	0.00805441	ncRNA_intronic	Alu-SINE
1-19216963	ENSG00000230424_EMC1-AS1	Amnion	Male	up_sites	0.0295224	ncRNA_intronic	Alu-SINE
1-19216963	ENSG00000230424_EMC1-AS1	Umbilical Cord	Male	up_sites	0.0198559	ncRNA_intronic	Alu-SINE
1-19215816	ENSG00000127463_EMC1	Villus of Maternal	Male	up_sites	0.0120794	ncRNA_intronic	Alu-SINE
1-19215964	ENSG00000127463_EMC1	Villus of Intermediate	Male	up_sites	0.0274889	ncRNA_intronic	Alu-SINE
1-19215969	ENSG00000127463_EMC1	Villus of Intermediate	Male	up_sites	0.0353508	ncRNA_intronic	Alu-SINE
1-19216127	ENSG00000127463_EMC1	Chorion	Male	up_sites	0.00805441	ncRNA_intronic	Alu-SINE
1-19216963	ENSG00000127463_EMC1	Amnion	Male	up_sites	0.0295224	ncRNA_intronic	Alu-SINE
1-19216963	ENSG00000127463_EMC1	Umbilical Cord	Male	up_sites	0.0198559	ncRNA_intronic	Alu-SINE
4-139046593	ENSG00000109381_ELF2	Chorion	Male	up_sites	0.000600557	downstream	Alu-SINE
4-139046849	ENSG00000109381_ELF2	Chorion	Male	Tibetan_sites	-	downstream	Alu-SINE
4-139047402	ENSG00000109381_ELF2	Chorion	Male	up_sites	0.000948198	intergenic	Alu-SINE
12-53153418	ENSG00000257790_EIF4A1P4	Chorion	Male	Tibetan_sites	-	ncRNA_exonic	-
1-32230724	ENSG00000084623_EIF3I	Chorionic Plate	Male	Han_sites	-	UTR3	Alu-SINE
2-37100944	ENSG00000055332_EIF2AK2	Amnion	Male	up_sites	0.00725343	UTR3	-
2-37102095	ENSG00000055332_EIF2AK2	Chorion	Male	up_sites	0.00306841	UTR3	Alu-SINE
2-37103288	ENSG00000055332_EIF2AK2	Chorionic Plate	Male	up_sites	0.0432351	UTR3	Alu-SINE
6-32165663	ENSG00000241404_EGFL8	Chorionic Plate	Male	Han_sites	-	intronic	Alu-SINE
6-32165756	ENSG00000241404_EGFL8	Chorionic Plate	Male	up_sites	0.0139483	intronic	Alu-SINE
2-232661636	ENSG00000115468_EFHD1	Villus of Fetal	Male	up_sites	0.0435956	intronic	Alu-SINE
16-22285539	ENSG00000103319_EEF2K	Amnion	Male	up_sites	0.0253768	UTR3	Alu-SINE
8-143595343	ENSG00000104529_EEF1D	Villus of Intermediate	Male	Han_sites	-	intronic	Alu-SINE
1-236484196	ENSG00000186197_EDARADD	Villus of Maternal	Male	Han_sites	-	ncRNA_exonic	-
1-236484510	ENSG00000186197_EDARADD	Chorionic Plate	Male	up_sites	0.0244295	UTR3	-
22-30660998	ENSG00000167065_DUSP18	Amnion	Male	up_sites	0.0166564	intronic	Alu-SINE
18-67507104	ENSG00000171451_DSEL	Chorion	Male	up_sites	0.0310557	ncRNA_intronic	Alu-SINE
18-67507252	ENSG00000171451_DSEL	Chorionic Plate	Male	up_sites	0.00545019	ncRNA_intronic	Alu-SINE
8-94792288	ENSG00000156162_DPY19L4	Chorion	Male	up_sites	0.0189681	ncRNA_exonic	Alu-SINE
8-94792377	ENSG00000156162_DPY19L4	Amnion	Male	up_sites	0.0367245	ncRNA_intronic	Alu-SINE
8-94792387	ENSG00000156162_DPY19L4	Chorionic Plate	Male	up_sites	0.00549438	ncRNA_intronic	Alu-SINE
8-94792413	ENSG00000156162_DPY19L4	Chorion	Male	Han_sites	-	ncRNA_intronic	Alu-SINE
8-94792431	ENSG00000156162_DPY19L4	Villus of Maternal	Male	up_sites	0.0311302	ncRNA_intronic	Alu-SINE
8-94792834	ENSG00000156162_DPY19L4	Chorion	Male	up_sites	0.0012679	ncRNA_exonic	Alu-SINE
16-3678734	ENSG00000213918_DNASE1	Chorion	Male	up_sites	0.0279526	intronic	Alu-SINE
10-73248973	ENSG00000236756_DNAJC9-AS1	Chorionic Plate	Male	up_sites	0.0105885	ncRNA_exonic	Alu-SINE
10-73249115	ENSG00000236756_DNAJC9-AS1	Chorionic Plate	Male	Han_sites	-	ncRNA_exonic	Alu-SINE
10-73250084	ENSG00000236756_DNAJC9-AS1	Amnion	Male	up_sites	0.0251352	ncRNA_intronic	Alu-SINE
11-31431288	ENSG00000170946_DNAJC24	Umbilical Cord	Male	up_sites	0.0184222	UTR3	Alu-SINE
11-31431672	ENSG00000170946_DNAJC24	Villus of Intermediate	Male	up_sites	0.0424317	UTR3	Alu-SINE
11-31431721	ENSG00000170946_DNAJC24	Amnion	Male	up_sites	0.0105293	UTR3	Alu-SINE
14-50326005	ENSG00000125375_DMAC2L	Umbilical Cord	Male	down_sites	0.0494638	UTR3	Alu-SINE
14-50327645	ENSG00000125375_DMAC2L	Chorion	Male	up_sites	0.0134494	ncRNA_intronic	Alu-SINE
20-36545675	ENSG00000232907_DLGAP4-AS1	Villus of Fetal	Male	up_sites	0.00656763	ncRNA_intronic	Alu-SINE
20-36546784	ENSG00000232907_DLGAP4-AS1	Chorionic Plate	Male	up_sites	0.0475916	ncRNA_intronic	Alu-SINE
1-10457257	ENSG00000160049_DFFA	Chorion	Male	up_sites	0.00439866	UTR3	Alu-SINE
1-10457428	ENSG00000160049_DFFA	Chorion	Male	up_sites	0.00386233	UTR3	Alu-SINE
1-10457596	ENSG00000160049_DFFA	Chorion	Male	up_sites	0.0386361	UTR3	Alu-SINE
1-10457935	ENSG00000160049_DFFA	Umbilical Cord	Male	up_sites	0.0168432	UTR3	Alu-SINE
1-10457977	ENSG00000160049_DFFA	Umbilical Cord	Male	up_sites	0.0407843	UTR3	Alu-SINE
1-10459007	ENSG00000160049_DFFA	Chorionic Plate	Male	up_sites	0.00680056	ncRNA_intronic	Alu-SINE
1-10459855	ENSG00000160049_DFFA	Villus of Fetal	Male	up_sites	0.00437201	UTR3	Alu-SINE
1-10460678	ENSG00000160049_DFFA	Villus of Fetal	Male	Han_sites	-	UTR3	Alu-SINE
1-10460762	ENSG00000160049_DFFA	Chorion	Male	up_sites	0.0126819	UTR3	Alu-SINE
1-10460762	ENSG00000160049_DFFA	Villus of Maternal	Male	down_sites	0.0263966	UTR3	Alu-SINE
1-10461069	ENSG00000160049_DFFA	Umbilical Cord	Male	up_sites	0.0083151	UTR3	Alu-SINE
1-10461113	ENSG00000160049_DFFA	Amnion	Male	up_sites	0.0335291	UTR3	Alu-SINE
1-10461143	ENSG00000160049_DFFA	Amnion	Male	up_sites	0.00631503	UTR3	Alu-SINE
22-41599953	ENSG00000100418_DESI1	Chorion	Male	up_sites	0.0111481	UTR3	Alu-SINE
22-41600057	ENSG00000100418_DESI1	Chorion	Male	up_sites	0.0348001	UTR3	Alu-SINE
3-57627308	ENSG00000174839_DENND6A	Chorionic Plate	Male	up_sites	0.0295454	UTR3	Alu-SINE
1-200648326	ENSG00000118197_DDX59	Villus of Intermediate	Male	Han_sites	-	intronic	Alu-SINE
4-17803229	ENSG00000163257_DCAF16	Amnion	Male	up_sites	0.00268618	UTR3	Alu-SINE
19-3962642	ENSG00000167657_DAPK3	Chorionic Plate	Male	up_sites	0.0320264	intronic	Alu-SINE
1-155733885	ENSG00000132676_DAP3	Villus of Intermediate	Male	up_sites	0.0206647	intronic	Alu-SINE
2-241746496	ENSG00000180902_D2HGDH	Chorionic Plate	Male	up_sites	0.0254282	intronic	Alu-SINE
2-203305318	ENSG00000119004_CYP20A1	Amnion	Male	up_sites	0.0100994	UTR3	Alu-SINE
15-51273968	ENSG00000137869_CYP19A1	Villus of Fetal	Male	up_sites	0.0366009	ncRNA_intronic	Alu-SINE
10-100232541	ENSG00000095485_CWF19L1	Chorion	Male	up_sites	0.0100243	ncRNA_intronic	Alu-SINE
1-150731131	ENSG00000163131_CTSS	Villus of Intermediate	Male	Han_sites	-	UTR3	Alu-SINE
1-150731185	ENSG00000163131_CTSS	Chorionic Plate	Male	up_sites	0.0225528	UTR3	Alu-SINE
1-150731196	ENSG00000163131_CTSS	Amnion	Male	Han_sites	-	UTR3	Alu-SINE
1-150731276	ENSG00000163131_CTSS	Villus of Fetal	Male	up_sites	0.00483375	UTR3	Alu-SINE
1-150732068	ENSG00000163131_CTSS	Chorionic Plate	Male	up_sites	0.011761	UTR3	Alu-SINE
1-150732109	ENSG00000163131_CTSS	Villus of Maternal	Male	up_sites	0.0164268	UTR3	Alu-SINE
1-150732178	ENSG00000163131_CTSS	Chorionic Plate	Male	up_sites	0.0122128	UTR3	Alu-SINE
8-11842861	ENSG00000164733_CTSB	Umbilical Cord	Male	Han_sites	-	UTR3	Alu-SINE
8-11842864	ENSG00000164733_CTSB	Amnion	Male	up_sites	0.0322649	UTR3	Alu-SINE
8-11842864	ENSG00000164733_CTSB	Umbilical Cord	Male	up_sites	0.0144765	UTR3	Alu-SINE
8-11843176	ENSG00000164733_CTSB	Amnion	Male	up_sites	0.015829	UTR3	Alu-SINE
8-11843176	ENSG00000164733_CTSB	Chorion	Male	up_sites	0.0472053	UTR3	Alu-SINE
8-11843176	ENSG00000164733_CTSB	Chorionic Plate	Male	up_sites	0.0447844	UTR3	Alu-SINE
8-11843176	ENSG00000164733_CTSB	Umbilical Cord	Male	up_sites	0.00190609	UTR3	Alu-SINE
8-11843176	ENSG00000164733_CTSB	Villus of Intermediate	Male	up_sites	0.0260523	UTR3	Alu-SINE
8-11843176	ENSG00000164733_CTSB	Villus of Maternal	Male	up_sites	0.0208721	UTR3	Alu-SINE
20-45895674	ENSG00000064601_CTSA	Chorion	Male	up_sites	0.0178561	UTR3	Alu-SINE
20-45895805	ENSG00000064601_CTSA	Chorionic Plate	Male	Han_sites	-	UTR3	Alu-SINE
20-45896115	ENSG00000064601_CTSA	Chorion	Male	up_sites	0.0176124	intronic	Alu-SINE
1-201515780	ENSG00000224536_CSRP1-AS1	Villus of Intermediate	Male	up_sites	0.00865954	ncRNA_intronic	ERV1-LTR
19-1980473	ENSG00000133275_CSNK1G2	Chorionic Plate	Male	Han_sites	-	UTR3	-
1-36477870	ENSG00000119535_CSF3R	Chorion	Male	up_sites	0.0209723	intronic	Alu-SINE
12-53174628	ENSG00000139631_CSAD	Chorionic Plate	Male	up_sites	0.0210619	intronic	Alu-SINE
12-53176619	ENSG00000139631_CSAD	Villus of Maternal	Male	Han_sites	-	intronic	Alu-SINE
12-53177735	ENSG00000139631_CSAD	Chorionic Plate	Male	down_sites	0.00565145	intronic	Alu-SINE
12-53177828	ENSG00000139631_CSAD	Umbilical Cord	Male	down_sites	0.0480638	intronic	Alu-SINE
12-53177841	ENSG00000139631_CSAD	Chorion	Male	Han_sites	-	intronic	Alu-SINE
12-53178703	ENSG00000139631_CSAD	Amnion	Male	up_sites	0.00844465	intronic	Alu-SINE
12-53178982	ENSG00000139631_CSAD	Amnion	Male	up_sites	0.0212107	intronic	Alu-SINE
12-53178982	ENSG00000139631_CSAD	Chorion	Male	up_sites	0.0351271	intronic	Alu-SINE
12-53179126	ENSG00000139631_CSAD	Amnion	Male	up_sites	0.00472524	UTR5	Alu-SINE
21-33591895	ENSG00000205758_CRYZL1	Umbilical Cord	Male	up_sites	0.0280093	intronic	Alu-SINE
21-33592807	ENSG00000205758_CRYZL1	Chorionic Plate	Male	up_sites	0.0359799	intronic	Alu-SINE
2-36523055	ENSG00000150938_CRIM1	Villus of Intermediate	Male	Han_sites	-	intronic	Alu-SINE
11-68755966	ENSG00000110090_CPT1A	Chorion	Male	up_sites	0.0488853	UTR3	Alu-SINE
11-68756000	ENSG00000110090_CPT1A	Amnion	Male	up_sites	0.0367421	UTR3	Alu-SINE
11-68756004	ENSG00000110090_CPT1A	Amnion	Male	up_sites	0.034513	UTR3	Alu-SINE
11-68756004	ENSG00000110090_CPT1A	Umbilical Cord	Male	up_sites	0.0140961	UTR3	Alu-SINE
11-68756036	ENSG00000110090_CPT1A	Chorion	Male	up_sites	0.00868671	UTR3	Alu-SINE
11-68756066	ENSG00000110090_CPT1A	Chorion	Male	up_sites	0.00614551	UTR3	Alu-SINE
20-35629797	ENSG00000214078_CPNE1	Chorionic Plate	Male	up_sites	0.00163179	intronic	Alu-SINE
20-35629823	ENSG00000214078_CPNE1	Villus of Intermediate	Male	up_sites	0.0375808	intronic	Alu-SINE
12-68851524	ENSG00000135678_CPM	Chorionic Plate	Male	up_sites	0.0315762	UTR3	Alu-SINE
12-68852766	ENSG00000135678_CPM	Chorionic Plate	Male	down_sites	0.0205216	UTR3	Alu-SINE
4-73057261	ENSG00000163626_COX18	Amnion	Male	up_sites	0.0189344	UTR3	Alu-SINE
4-73057379	ENSG00000163626_COX18	Umbilical Cord	Male	up_sites	0.0135767	UTR3	Alu-SINE
4-73057380	ENSG00000163626_COX18	Umbilical Cord	Male	up_sites	0.0178421	UTR3	Alu-SINE
14-70369354	ENSG00000133983_COX16	Amnion	Male	up_sites	0.00680129	UTR3	Alu-SINE
9-128331692	ENSG00000167113_COQ4	Villus of Fetal	Male	up_sites	0.0449123	intronic	Alu-SINE
18-318578	ENSG00000158270_COLEC12	Villus of Fetal	Male	Han_sites	-	ncRNA_intronic	Alu-SINE
18-318630	ENSG00000158270_COLEC12	Chorionic Plate	Male	up_sites	0.0136758	ncRNA_intronic	Alu-SINE
2-189011808	ENSG00000168542_COL3A1	Amnion	Male	Han_sites	-	UTR3	-
19-11542342	ENSG00000130176_CNN1	Umbilical Cord	Male	up_sites	0.0046185	intronic	Alu-SINE
19-11542393	ENSG00000130176_CNN1	Umbilical Cord	Male	up_sites	0.00243718	intronic	Alu-SINE
19-11542776	ENSG00000130176_CNN1	Umbilical Cord	Male	Han_sites	-	intronic	Alu-SINE
9-36215080	ENSG00000122705_CLTA	Chorionic Plate	Male	up_sites	0.0238846	UTR3	Alu-SINE
9-36215301	ENSG00000122705_CLTA	Amnion	Male	up_sites	0.0113662	UTR3	Alu-SINE
9-36216702	ENSG00000122705_CLTA	Umbilical Cord	Male	up_sites	0.00723617	UTR3	Alu-SINE
15-65150145	ENSG00000166855_CLPX	Amnion	Male	up_sites	0.0115858	UTR3	Alu-SINE
11-123071672	ENSG00000166250_CLMP	Amnion	Male	up_sites	0.00776788	ncRNA_intronic	Alu-SINE
14-95185097	ENSG00000165959_CLMN	Amnion	Male	up_sites	0.0251352	UTR3	Alu-SINE
2-178435308	ENSG00000223960_CHROMR	Chorionic Plate	Male	up_sites	0.0472837	ncRNA_intronic	Alu-SINE
2-201165436	ENSG00000003402_CFLAR	Amnion	Male	up_sites	0.0147765	UTR3	Alu-SINE
16-67005726	ENSG00000172824_CES4A	Amnion	Male	up_sites	0.00671428	intronic	Alu-SINE
9-128426230	ENSG00000167123_CERCAM	Chorionic Plate	Male	up_sites	0.025866	intronic	Alu-SINE
19-32970399	ENSG00000121289_CEP89	Umbilical Cord	Male	up_sites	0.048052	UTR3	Alu-SINE
16-81030731	ENSG00000166451_CENPN	Villus of Maternal	Male	Han_sites	-	ncRNA_intronic	Alu-SINE
19-58584082	ENSG00000213753_CENPBD2P	Amnion	Male	up_sites	0.00611628	ncRNA_exonic	Alu-SINE
19-58584089	ENSG00000213753_CENPBD2P	Amnion	Male	up_sites	0.00556471	ncRNA_exonic	Alu-SINE
19-58584115	ENSG00000213753_CENPBD2P	Amnion	Male	up_sites	0.00193031	ncRNA_exonic	Alu-SINE
19-58584115	ENSG00000213753_CENPBD2P	Villus of Maternal	Male	up_sites	0.0153758	ncRNA_exonic	Alu-SINE
19-58584206	ENSG00000213753_CENPBD2P	Amnion	Male	up_sites	0.0121391	ncRNA_exonic	Alu-SINE
19-58584206	ENSG00000213753_CENPBD2P	Umbilical Cord	Male	up_sites	0.0476609	ncRNA_exonic	Alu-SINE
11-119009890	ENSG00000186166_CENATAC	Chorion	Male	up_sites	0.0262226	intronic	Alu-SINE
11-119010009	ENSG00000186166_CENATAC	Amnion	Male	up_sites	0.0422261	intronic	Alu-SINE
11-119010086	ENSG00000186166_CENATAC	Chorionic Plate	Male	up_sites	0.000253689	intronic	Alu-SINE
11-119010099	ENSG00000186166_CENATAC	Amnion	Male	up_sites	0.0148117	intronic	Alu-SINE
19-44665523	ENSG00000186567_CEACAM19	Chorion	Male	up_sites	0.0110814	ncRNA_exonic	Alu-SINE
19-44665527	ENSG00000186567_CEACAM19	Villus of Maternal	Male	down_sites	0.0354653	ncRNA_exonic	Alu-SINE
14-50327645	ENSG00000100490_CDKL1	Chorion	Male	up_sites	0.0134494	ncRNA_intronic	Alu-SINE
16-89687664	ENSG00000185324_CDK10	Villus of Maternal	Male	Han_sites	-	non-synonymous	Alu-SINE
16-89689021	ENSG00000185324_CDK10	Villus of Fetal	Male	up_sites	0.0415025	intronic	Alu-SINE
13-114259018	ENSG00000130177_CDC16	Villus of Maternal	Male	Han_sites	-	intronic	Alu-SINE
X-2717254	ENSG00000002586_CD99	Amnion	Male	up_sites	0.0184827	intronic	Alu-SINE
1-207768991	ENSG00000117335_CD46	Amnion	Male	up_sites	0.00657261	ncRNA_intronic	Alu-SINE
1-207769183	ENSG00000117335_CD46	Chorionic Plate	Male	up_sites	0.0317437	ncRNA_intronic	Alu-SINE
1-207769891	ENSG00000117335_CD46	Chorion	Male	up_sites	0.0341978	ncRNA_intronic	Alu-SINE
1-207769905	ENSG00000117335_CD46	Amnion	Male	up_sites	0.00163624	ncRNA_intronic	Alu-SINE
1-207769911	ENSG00000117335_CD46	Amnion	Male	up_sites	0.0214127	ncRNA_intronic	Alu-SINE
12-7439562	ENSG00000177675_CD163L1	Villus of Intermediate	Male	down_sites	0.0316786	ncRNA_exonic	-
12-7439708	ENSG00000177675_CD163L1	Chorion	Male	Han_sites	-	ncRNA_exonic	-
2-207754945	ENSG00000163249_CCNYL1	Umbilical Cord	Male	down_sites	0.0055173	UTR3	Alu-SINE
2-207755018	ENSG00000163249_CCNYL1	Amnion	Male	up_sites	0.0327398	UTR3	Alu-SINE
2-207755025	ENSG00000163249_CCNYL1	Amnion	Male	up_sites	0.0135188	UTR3	Alu-SINE
3-112601611	ENSG00000091986_CCDC80	Amnion	Male	up_sites	0.00663484	UTR3	Alu-SINE
5-69282476	ENSG00000183323_CCDC125	Chorion	Male	Han_sites	-	UTR3	Alu-SINE
5-69282479	ENSG00000183323_CCDC125	Chorion	Male	Han_sites	-	UTR3	Alu-SINE
10-68757606	ENSG00000060339_CCAR1	Chorionic Plate	Male	up_sites	0.0463297	intronic	Alu-SINE
10-68759278	ENSG00000060339_CCAR1	Villus of Fetal	Male	up_sites	0.00865787	intronic	Alu-SINE
10-68759294	ENSG00000060339_CCAR1	Villus of Fetal	Male	up_sites	0.0095126	intronic	Alu-SINE
10-68759312	ENSG00000060339_CCAR1	Villus of Fetal	Male	up_sites	0.00957955	intronic	Alu-SINE
10-68760183	ENSG00000060339_CCAR1	Villus of Fetal	Male	up_sites	0.0145265	intronic	Alu-SINE
2-201287339	ENSG00000064012_CASP8	Chorion	Male	up_sites	0.000565344	UTR3	Alu-SINE
2-201287355	ENSG00000064012_CASP8	Umbilical Cord	Male	up_sites	0.00808939	UTR3	Alu-SINE
2-201287383	ENSG00000064012_CASP8	Chorion	Male	up_sites	0.0239762	UTR3	Alu-SINE
2-201219195	ENSG00000003400_CASP10	Chorionic Plate	Male	up_sites	0.00371427	UTR3	Alu-SINE
17-4985486	ENSG00000108509_CAMTA2	Villus of Intermediate	Male	Han_sites	-	intronic	Alu-SINE
X-15783537	ENSG00000169239_CA5B	Chorion	Male	up_sites	0.00485763	UTR3	Alu-SINE
6-42098117	ENSG00000188112_C6orf132	Amnion	Male	up_sites	0.00387613	UTR3	Alu-SINE
4-86914237	ENSG00000285458_C4orf36	Chorionic Plate	Male	down_sites	0.00441977	ncRNA_exonic	-
4-86914291	ENSG00000285458_C4orf36	Chorionic Plate	Male	down_sites	0.00770059	ncRNA_exonic	-
4-86914291	ENSG00000285458_C4orf36	Villus of Fetal	Male	down_sites	0.00528838	ncRNA_exonic	-
4-86876372	ENSG00000163633_C4orf36	Villus of Maternal	Male	up_sites	0.00478572	ncRNA_exonic	-
2-85609818	ENSG00000168887_C2orf68	Umbilical Cord	Male	up_sites	0.0029546	intronic	Alu-SINE
2-85609819	ENSG00000168887_C2orf68	Umbilical Cord	Male	up_sites	0.00406204	intronic	Alu-SINE
22-37944643	ENSG00000128346_C22orf23	Chorionic Plate	Male	up_sites	0.000378925	ncRNA_exonic	Alu-SINE
22-37944672	ENSG00000128346_C22orf23	Chorionic Plate	Male	up_sites	0.0351623	ncRNA_exonic	Alu-SINE
22-37944743	ENSG00000128346_C22orf23	Chorion	Male	Han_sites	-	ncRNA_exonic	Alu-SINE
22-37945852	ENSG00000128346_C22orf23	Chorionic Plate	Male	Han_sites	-	intronic	Alu-SINE
22-37945858	ENSG00000128346_C22orf23	Amnion	Male	up_sites	0.0408264	intronic	Alu-SINE
22-37947896	ENSG00000128346_C22orf23	Villus of Intermediate	Male	Han_sites	-	intronic	Alu-SINE
22-37947984	ENSG00000128346_C22orf23	Chorionic Plate	Male	down_sites	0.0200769	intronic	Alu-SINE
22-37948064	ENSG00000128346_C22orf23	Amnion	Male	up_sites	0.0177731	intronic	Alu-SINE
22-37948067	ENSG00000128346_C22orf23	Amnion	Male	up_sites	0.0463391	intronic	Alu-SINE
11-108365758	ENSG00000166323_C11orf65	Chorion	Male	up_sites	0.00189406	UTR3	Alu-SINE
11-108365796	ENSG00000166323_C11orf65	Chorion	Male	up_sites	0.000795795	UTR3	Alu-SINE
11-16756695	ENSG00000110696_C11orf58	Umbilical Cord	Male	up_sites	0.0117019	UTR3	Alu-SINE
12-125027961	ENSG00000184992_BRI3BP	Amnion	Male	up_sites	0.0407843	UTR3	Alu-SINE
1-220058010	ENSG00000162813_BPNT1	Chorion	Male	up_sites	0.00272952	UTR3	Alu-SINE
1-220058028	ENSG00000162813_BPNT1	Chorion	Male	Han_sites	-	UTR3	Alu-SINE
1-220058669	ENSG00000162813_BPNT1	Chorion	Male	up_sites	0.0262402	UTR3	Alu-SINE
2-241572723	ENSG00000176720_BOK	Amnion	Male	up_sites	0.0256662	UTR3	-
22-23264129	ENSG00000186716_BCR	Chorionic Plate	Male	down_sites	0.00283884	ncRNA_exonic	-
12-24816887	ENSG00000060982_BCAT1	Amnion	Male	up_sites	0.0221845	UTR3	hAT-Charlie-DNA
7-107628705	ENSG00000075790_BCAP29	Villus of Fetal	Male	Han_sites	-	ncRNA_exonic	-
21-41173689	ENSG00000182240_BACE2	Villus of Maternal	Male	down_sites	0.0465337	intronic	Alu-SINE
19-17809336	ENSG00000179913_B3GNT3	Amnion	Male	up_sites	0.0216562	intronic	Alu-SINE
9-91292452	ENSG00000148090_AUH	Amnion	Male	Tibetan_sites	-	intronic	Alu-SINE
11-108365758	ENSG00000149311_ATM	Chorion	Male	up_sites	0.00189406	UTR3	Alu-SINE
11-108365796	ENSG00000149311_ATM	Chorion	Male	up_sites	0.000795795	UTR3	Alu-SINE
14-55367486	ENSG00000126775_ATG14	Amnion	Male	up_sites	0.0249163	UTR3	Alu-SINE
14-55367486	ENSG00000126775_ATG14	Chorion	Male	up_sites	0.00182182	UTR3	Alu-SINE
14-55367486	ENSG00000126775_ATG14	Chorionic Plate	Male	up_sites	0.0027617	UTR3	Alu-SINE
14-55367498	ENSG00000126775_ATG14	Villus of Maternal	Male	up_sites	0.00824762	UTR3	Alu-SINE
14-55367499	ENSG00000126775_ATG14	Amnion	Male	up_sites	0.0118021	UTR3	Alu-SINE
14-55367499	ENSG00000126775_ATG14	Chorion	Male	up_sites	0.00655646	UTR3	Alu-SINE
14-55367499	ENSG00000126775_ATG14	Chorionic Plate	Male	up_sites	0.0243309	UTR3	Alu-SINE
14-55367499	ENSG00000126775_ATG14	Villus of Maternal	Male	up_sites	0.00170972	UTR3	Alu-SINE
14-55367526	ENSG00000126775_ATG14	Chorion	Male	up_sites	0.0247869	UTR3	Alu-SINE
14-55367526	ENSG00000126775_ATG14	Villus of Maternal	Male	up_sites	0.0252605	UTR3	Alu-SINE
14-55367578	ENSG00000126775_ATG14	Chorion	Male	up_sites	0.0115925	UTR3	Alu-SINE
14-55367578	ENSG00000126775_ATG14	Villus of Intermediate	Male	up_sites	0.00413334	UTR3	Alu-SINE
14-55367600	ENSG00000126775_ATG14	Umbilical Cord	Male	up_sites	0.00939551	UTR3	Alu-SINE
14-55367643	ENSG00000126775_ATG14	Villus of Fetal	Male	up_sites	0.0108642	UTR3	Alu-SINE
14-55368248	ENSG00000126775_ATG14	Villus of Fetal	Male	up_sites	0.00511913	UTR3	Alu-SINE
14-55368402	ENSG00000126775_ATG14	Amnion	Male	up_sites	0.0233682	UTR3	Alu-SINE
14-55368515	ENSG00000126775_ATG14	Amnion	Male	up_sites	0.0241896	UTR3	Alu-SINE
20-34246151	ENSG00000101440_ASIP	Villus of Fetal	Male	Tibetan_sites	-	ncRNA_exonic	-
X-2906302	ENSG00000006756_ARSD	Amnion	Male	up_sites	0.0417672	UTR3	Alu-SINE
X-2906942	ENSG00000006756_ARSD	Chorion	Male	up_sites	0.0108941	UTR3	Alu-SINE
22-50624200	ENSG00000100299_ARSA	Umbilical Cord	Male	up_sites	0.00328324	UTR3	Alu-SINE
9-137610465	ENSG00000197070_ARRDC1	Villus of Fetal	Male	down_sites	0.0275806	ncRNA_intronic	Alu-SINE
9-137611300	ENSG00000197070_ARRDC1	Amnion	Male	up_sites	0.00895677	ncRNA_intronic	Alu-SINE
15-89897250	ENSG00000250021_ARPIN-AP3S2	Villus of Fetal	Male	up_sites	0.0234161	UTR3	Alu-SINE
15-89897322	ENSG00000250021_ARPIN-AP3S2	Amnion	Male	up_sites	0.0337374	UTR3	Alu-SINE
15-89897355	ENSG00000250021_ARPIN-AP3S2	Umbilical Cord	Male	up_sites	0.00161178	UTR3	Alu-SINE
15-89897363	ENSG00000250021_ARPIN-AP3S2	Villus of Fetal	Male	up_sites	0.0355264	UTR3	Alu-SINE
15-89899302	ENSG00000250021_ARPIN-AP3S2	Amnion	Male	up_sites	0.00237031	UTR3	Alu-SINE
15-89899312	ENSG00000250021_ARPIN-AP3S2	Villus of Maternal	Male	Han_sites	-	UTR3	Alu-SINE
15-89899317	ENSG00000250021_ARPIN-AP3S2	Chorionic Plate	Male	Han_sites	-	UTR3	Alu-SINE
15-89901496	ENSG00000250021_ARPIN-AP3S2	Amnion	Male	up_sites	0.00319509	UTR3	Alu-SINE
15-89901496	ENSG00000250021_ARPIN-AP3S2	Chorion	Male	up_sites	0.00396161	UTR3	Alu-SINE
15-89897250	ENSG00000242498_ARPIN	Villus of Fetal	Male	up_sites	0.0234161	UTR3	Alu-SINE
15-89897322	ENSG00000242498_ARPIN	Amnion	Male	up_sites	0.0337374	UTR3	Alu-SINE
15-89897355	ENSG00000242498_ARPIN	Umbilical Cord	Male	up_sites	0.00161178	UTR3	Alu-SINE
15-89897363	ENSG00000242498_ARPIN	Villus of Fetal	Male	up_sites	0.0355264	UTR3	Alu-SINE
15-89899302	ENSG00000242498_ARPIN	Amnion	Male	up_sites	0.00237031	UTR3	Alu-SINE
15-89899312	ENSG00000242498_ARPIN	Villus of Maternal	Male	Han_sites	-	UTR3	Alu-SINE
15-89899317	ENSG00000242498_ARPIN	Chorionic Plate	Male	Han_sites	-	UTR3	Alu-SINE
15-89901496	ENSG00000242498_ARPIN	Amnion	Male	up_sites	0.00319509	UTR3	Alu-SINE
15-89901496	ENSG00000242498_ARPIN	Chorion	Male	up_sites	0.00396161	UTR3	Alu-SINE
2-218235293	ENSG00000163466_ARPC2	Amnion	Male	up_sites	0.0246858	intronic	Alu-SINE
2-218235293	ENSG00000163466_ARPC2	Chorion	Male	up_sites	0.0104278	intronic	Alu-SINE
2-218235856	ENSG00000163466_ARPC2	Amnion	Male	up_sites	0.0358593	intronic	Alu-SINE
2-218236685	ENSG00000163466_ARPC2	Villus of Intermediate	Male	up_sites	0.00471426	intronic	Alu-SINE
2-218237670	ENSG00000163466_ARPC2	Amnion	Male	up_sites	0.0168092	intronic	Alu-SINE
5-176379298	ENSG00000175414_ARL10	Umbilical Cord	Male	up_sites	0.0263209	UTR3	Alu-SINE
17-64751217	ENSG00000215769_ARHGAP27P1-BPTFP1-KPNA2P3	Amnion	Male	up_sites	0.0217544	ncRNA_exonic	-
5-143225288	ENSG00000145819_ARHGAP26	Chorionic Plate	Male	down_sites	0.0357797	UTR3	Alu-SINE
5-143225288	ENSG00000145819_ARHGAP26	Villus of Fetal	Male	up_sites	0.00121785	UTR3	Alu-SINE
5-143225288	ENSG00000145819_ARHGAP26	Villus of Intermediate	Male	up_sites	0.027452	UTR3	Alu-SINE
5-143225363	ENSG00000145819_ARHGAP26	Villus of Maternal	Male	down_sites	0.0291604	UTR3	Alu-SINE
16-24940500	ENSG00000140750_ARHGAP17	Villus of Intermediate	Male	up_sites	0.0185126	intronic	Alu-SINE
11-47168659	ENSG00000149182_ARFGAP2	Chorion	Male	up_sites	0.0224294	ncRNA_intronic	Alu-SINE
X-85091020	ENSG00000155008_APOOL	Umbilical Cord	Male	up_sites	0.00846853	UTR3	Alu-SINE
22-35659866	ENSG00000221963_APOL6	Chorion	Male	up_sites	0.00348843	UTR3	Alu-SINE
22-35659869	ENSG00000221963_APOL6	Chorion	Male	up_sites	0.0106597	UTR3	Alu-SINE
22-35660551	ENSG00000221963_APOL6	Chorion	Male	up_sites	0.0108482	UTR3	ERVL-MaLR-LTR
22-35660685	ENSG00000221963_APOL6	Chorion	Male	up_sites	0.035274	UTR3	ERVL-MaLR-LTR
22-35661308	ENSG00000221963_APOL6	Chorion	Male	up_sites	0.03192	UTR3	Alu-SINE
22-36266350	ENSG00000100342_APOL1	Amnion	Male	up_sites	0.00443532	UTR3	Alu-SINE
22-36266351	ENSG00000100342_APOL1	Amnion	Male	up_sites	0.0151756	UTR3	Alu-SINE
22-39019867	ENSG00000244509_APOBEC3C	Umbilical Cord	Male	up_sites	0.0035926	UTR3	Alu-SINE
22-39019886	ENSG00000244509_APOBEC3C	Chorion	Male	up_sites	0.00597396	UTR3	Alu-SINE
22-39019906	ENSG00000244509_APOBEC3C	Chorionic Plate	Male	up_sites	0.00204848	UTR3	Alu-SINE
19-1458752	ENSG00000115266_APC2	Chorionic Plate	Male	Han_sites	-	intronic	Alu-SINE
14-31095954	ENSG00000100478_AP4S1	Villus of Fetal	Male	up_sites	0.0345187	UTR3	Alu-SINE
14-31095991	ENSG00000100478_AP4S1	Villus of Intermediate	Male	up_sites	0.0315744	UTR3	Alu-SINE
14-31096006	ENSG00000100478_AP4S1	Villus of Maternal	Male	up_sites	0.0245554	UTR3	Alu-SINE
2-223755695	ENSG00000152056_AP1S3	Amnion	Male	up_sites	0.0156405	UTR3	Alu-SINE
13-110898975	ENSG00000088448_ANKRD10	Chorion	Male	Han_sites	-	ncRNA_intronic	Alu-SINE
13-110900009	ENSG00000088448_ANKRD10	Amnion	Male	up_sites	0.00771947	intronic	Alu-SINE
5-14715311	ENSG00000154122_ANKH	Umbilical Cord	Male	down_sites	0.0379424	intronic	Alu-SINE
12-121331976	ENSG00000089053_ANAPC5	Amnion	Male	up_sites	0.0294828	intronic	Alu-SINE
10-72234111	ENSG00000166295_ANAPC16	Chorion	Male	up_sites	0.0292382	UTR3	Alu-SINE
10-72234152	ENSG00000166295_ANAPC16	Chorion	Male	up_sites	0.0224001	UTR3	Alu-SINE
10-72235263	ENSG00000166295_ANAPC16	Chorion	Male	up_sites	0.00652148	UTR3	Alu-SINE
10-72235345	ENSG00000166295_ANAPC16	Chorion	Male	up_sites	0.00725859	UTR3	Alu-SINE
7-2722883	ENSG00000174945_AMZ1	Chorionic Plate	Male	up_sites	0.0236995	intergenic	Alu-SINE
6-110897569	ENSG00000123505_AMD1	Chorionic Plate	Male	up_sites	0.040057	UTR3	Alu-SINE
11-43898586	ENSG00000166199_ALKBH3	Chorionic Plate	Male	Han_sites	-	ncRNA_exonic	-
11-43898647	ENSG00000166199_ALKBH3	Chorionic Plate	Male	Han_sites	-	ncRNA_exonic	-
13-52030810	ENSG00000253710_ALG11	Umbilical Cord	Male	down_sites	0.037418	non-synonymous	-
14-22972939	ENSG00000129474_AJUBA	Chorion	Male	up_sites	0.0256924	UTR3	-
14-22972941	ENSG00000129474_AJUBA	Chorion	Male	up_sites	0.0359799	UTR3	-
7-17345106	ENSG00000106546_AHR	Amnion	Male	up_sites	0.00289833	UTR3	Alu-SINE
7-17345194	ENSG00000106546_AHR	Amnion	Male	up_sites	0.00139333	UTR3	Alu-SINE
8-66455859	ENSG00000147576_ADHFE1	Villus of Fetal	Male	up_sites	0.00193766	intronic	Alu-SINE
17-75944794	ENSG00000161533_ACOX1	Amnion	Male	up_sites	0.00495953	ncRNA_intronic	Alu-SINE
X-23701907	ENSG00000123130_ACOT9	Amnion	Male	up_sites	0.00966542	UTR3	Alu-SINE
X-23703415	ENSG00000123130_ACOT9	Villus of Maternal	Male	up_sites	0.0260977	UTR3	Alu-SINE
X-23703455	ENSG00000123130_ACOT9	Amnion	Male	up_sites	0.0161862	UTR3	Alu-SINE
1-54637438	ENSG00000162390_ACOT11	Amnion	Male	Tibetan_sites	-	UTR3	Alu-SINE
1-54639071	ENSG00000162390_ACOT11	Amnion	Male	Tibetan_sites	-	UTR3	Alu-SINE
1-54639074	ENSG00000162390_ACOT11	Amnion	Male	Tibetan_sites	-	UTR3	Alu-SINE
15-89201430	ENSG00000140526_ABHD2	Amnion	Male	up_sites	0.027823	ncRNA_exonic	-
15-89201452	ENSG00000140526_ABHD2	Amnion	Male	up_sites	0.04006	ncRNA_exonic	-
15-89201741	ENSG00000140526_ABHD2	Umbilical Cord	Male	up_sites	0.00478572	ncRNA_exonic	-
15-89201780	ENSG00000140526_ABHD2	Umbilical Cord	Male	up_sites	0.000493048	UTR3	-
15-89201788	ENSG00000140526_ABHD2	Umbilical Cord	Male	up_sites	0.00312322	UTR3	-
7-73736181	ENSG00000106077_ABHD11	Amnion	Male	Tibetan_sites	-	UTR3	-
7-73736181	ENSG00000106077_ABHD11	Chorionic Plate	Male	Tibetan_sites	-	UTR3	-
7-73736181	ENSG00000106077_ABHD11	Villus of Fetal	Male	Tibetan_sites	-	UTR3	-
7-73736181	ENSG00000106077_ABHD11	Villus of Intermediate	Male	Tibetan_sites	-	UTR3	-
6-30593205	ENSG00000204574_ABCF1	Umbilical Cord	Male	Han_sites	-	intronic	Alu-SINE
6-30593231	ENSG00000204574_ABCF1	Umbilical Cord	Male	Han_sites	-	intronic	Alu-SINE
17-68134969	ENSG00000291214_-	Villus of Intermediate	Male	up_sites	0.0302324	ncRNA_exonic	-
17-68134990	ENSG00000291214_-	Amnion	Male	down_sites	0.0401636	ncRNA_exonic	-
17-68135384	ENSG00000291214_-	Chorion	Male	up_sites	0.00494594	ncRNA_exonic	-
17-68135387	ENSG00000291214_-	Chorion	Male	up_sites	0.0020716	ncRNA_exonic	-
17-68135387	ENSG00000291214_-	Chorionic Plate	Male	up_sites	0.0380696	ncRNA_exonic	-
17-68135389	ENSG00000291214_-	Chorion	Male	up_sites	0.00811256	ncRNA_exonic	-
12-132126692	ENSG00000291171_-	Villus of Fetal	Male	down_sites	0.0388189	ncRNA_exonic	-
15-84642257	ENSG00000291159_-	Amnion	Male	up_sites	0.0204512	ncRNA_exonic	Alu-SINE
7-66526481	ENSG00000291136_-	Chorion	Male	up_sites	0.0225082	ncRNA_exonic	Alu-SINE
7-66527255	ENSG00000291136_-	Chorion	Male	down_sites	0.0159761	ncRNA_exonic	Alu-SINE
7-66554118	ENSG00000291136_-	Amnion	Male	up_sites	0.00264751	ncRNA_exonic	-
7-66554119	ENSG00000291136_-	Chorionic Plate	Male	up_sites	0.00398755	ncRNA_exonic	-
19-53215258	ENSG00000291131_-	Chorion	Male	Han_sites	-	ncRNA_intronic	Alu-SINE
1-39546569	ENSG00000291129_-	Chorion	Male	Han_sites	-	ncRNA_intronic	Alu-SINE
20-28582327	ENSG00000291100_-	Umbilical Cord	Male	down_sites	0.0336824	ncRNA_exonic	Alu-SINE
10-29460860	ENSG00000291093_-	Villus of Intermediate	Male	up_sites	0.0478115	ncRNA_exonic	Alu-SINE
3-197613017	ENSG00000291091_-	Umbilical Cord	Male	up_sites	0.0149859	ncRNA_exonic	Alu-SINE
7-75368313	ENSG00000290951_-	Umbilical Cord	Male	up_sites	0.0434811	ncRNA_intronic	Alu-SINE
7-65722954	ENSG00000290926_-	Umbilical Cord	Male	up_sites	0.0452615	ncRNA_intronic	Alu-SINE
1-1729519	ENSG00000290854_-	Umbilical Cord	Male	up_sites	0.00392011	ncRNA_intronic	Alu-SINE
1-1729519	ENSG00000290854_-	Villus of Fetal	Male	up_sites	0.00400053	ncRNA_intronic	Alu-SINE
1-1729519	ENSG00000290854_-	Villus of Intermediate	Male	up_sites	0.0352515	ncRNA_intronic	Alu-SINE
1-1731255	ENSG00000290854_-	Chorion	Male	Han_sites	-	ncRNA_exonic	Alu-SINE
2-227618377	ENSG00000290795_-	Villus of Intermediate	Male	down_sites	0.00915416	ncRNA_intronic	Alu-SINE
19-56379238	ENSG00000290720_-	Villus of Intermediate	Male	down_sites	0.0436058	ncRNA_exonic	Alu-SINE
19-56379334	ENSG00000290720_-	Chorion	Male	up_sites	0.0388753	ncRNA_exonic	Alu-SINE
19-56379406	ENSG00000290720_-	Umbilical Cord	Male	up_sites	0.00569129	ncRNA_exonic	Alu-SINE
17-68134969	ENSG00000290646_-	Villus of Intermediate	Male	up_sites	0.0302324	ncRNA_exonic	-
17-68134990	ENSG00000290646_-	Amnion	Male	down_sites	0.0401636	ncRNA_exonic	-
17-68135384	ENSG00000290646_-	Chorion	Male	up_sites	0.00494594	ncRNA_exonic	-
17-68135387	ENSG00000290646_-	Chorion	Male	up_sites	0.0020716	ncRNA_exonic	-
17-68135387	ENSG00000290646_-	Chorionic Plate	Male	up_sites	0.0380696	ncRNA_exonic	-
17-68135389	ENSG00000290646_-	Chorion	Male	up_sites	0.00811256	ncRNA_exonic	-
4-3948699	ENSG00000290374_-	Villus of Maternal	Male	up_sites	0.0385603	ncRNA_intronic	Alu-SINE
19-52618252	ENSG00000290073_-	Amnion	Male	up_sites	0.0122447	ncRNA_intronic	Alu-SINE
3-15072386	ENSG00000289750_-	Villus of Intermediate	Male	up_sites	0.0383011	ncRNA_intronic	Alu-SINE
3-15072786	ENSG00000289750_-	Chorionic Plate	Male	up_sites	0.0237748	ncRNA_intronic	Alu-SINE
12-50931504	ENSG00000289695_-	Umbilical Cord	Male	up_sites	0.00576004	UTR3	Alu-SINE
12-50931636	ENSG00000289695_-	Umbilical Cord	Male	up_sites	3.43854e-05	UTR3	Alu-SINE
1-145921979	ENSG00000289565_-	Amnion	Male	up_sites	0.00592369	ncRNA_intronic	Alu-SINE
1-145922969	ENSG00000289565_-	Chorion	Male	up_sites	0.0414142	ncRNA_intronic	Alu-SINE
11-123071672	ENSG00000288061_-	Amnion	Male	up_sites	0.00776788	ncRNA_intronic	Alu-SINE
12-7964053	ENSG00000288043_-	Chorion	Male	up_sites	0.0168995	ncRNA_intronic	Alu-SINE
12-7964147	ENSG00000288043_-	Chorion	Male	up_sites	0.0185453	ncRNA_intronic	Alu-SINE
12-7970442	ENSG00000288043_-	Chorion	Male	up_sites	0.0372101	ncRNA_intronic	Alu-SINE
12-7970468	ENSG00000288043_-	Chorion	Male	up_sites	0.000359381	ncRNA_intronic	Alu-SINE
12-7970498	ENSG00000288043_-	Chorion	Male	up_sites	0.0349305	ncRNA_intronic	Alu-SINE
12-7970530	ENSG00000288043_-	Chorion	Male	up_sites	0.0355979	ncRNA_intronic	Alu-SINE
3-9700945	ENSG00000287878_-	Villus of Intermediate	Male	Han_sites	-	ncRNA_intronic	Alu-SINE
3-10151132	ENSG00000287086_-	Umbilical Cord	Male	up_sites	0.0247145	ncRNA_intronic	Alu-SINE
3-10152113	ENSG00000287086_-	Villus of Fetal	Male	Tibetan_sites	-	ncRNA_intronic	Alu-SINE
3-10152632	ENSG00000287086_-	Chorionic Plate	Male	down_sites	0.032879	ncRNA_intronic	Alu-SINE
19-58584082	ENSG00000286104_-	Amnion	Male	up_sites	0.00611628	ncRNA_exonic	Alu-SINE
19-58584089	ENSG00000286104_-	Amnion	Male	up_sites	0.00556471	ncRNA_exonic	Alu-SINE
19-58584115	ENSG00000286104_-	Amnion	Male	up_sites	0.00193031	ncRNA_exonic	Alu-SINE
19-58584115	ENSG00000286104_-	Villus of Maternal	Male	up_sites	0.0153758	ncRNA_exonic	Alu-SINE
19-58584206	ENSG00000286104_-	Amnion	Male	up_sites	0.0121391	ncRNA_exonic	Alu-SINE
19-58584206	ENSG00000286104_-	Umbilical Cord	Male	up_sites	0.0476609	ncRNA_exonic	Alu-SINE
16-57177869	ENSG00000285979_-	Villus of Fetal	Male	up_sites	0.0162932	ncRNA_intronic	Alu-SINE
15-41299144	ENSG00000285920_-	Amnion	Male	up_sites	7.78883e-05	ncRNA_exonic	Alu-SINE
15-41299253	ENSG00000285920_-	Amnion	Male	up_sites	0.00348766	ncRNA_exonic	Alu-SINE
6-149820961	ENSG00000285889_-	Umbilical Cord	Male	up_sites	0.0255698	ncRNA_intronic	Alu-SINE
6-149821134	ENSG00000285889_-	Amnion	Male	up_sites	0.00350997	ncRNA_intronic	Alu-SINE
6-149822103	ENSG00000285889_-	Amnion	Male	up_sites	0.0196779	ncRNA_intronic	Alu-SINE
6-149822103	ENSG00000285889_-	Chorion	Male	up_sites	0.00659142	ncRNA_intronic	Alu-SINE
6-149822299	ENSG00000285889_-	Chorion	Male	up_sites	0.0019013	ncRNA_intronic	Alu-SINE
6-149822318	ENSG00000285889_-	Chorionic Plate	Male	Han_sites	-	ncRNA_intronic	Alu-SINE
6-149825813	ENSG00000285889_-	Amnion	Male	up_sites	0.0020349	ncRNA_intronic	Alu-SINE
6-149825900	ENSG00000285889_-	Amnion	Male	up_sites	0.025202	ncRNA_intronic	Alu-SINE
1-153605594	ENSG00000285867_-	Amnion	Male	up_sites	0.00530489	ncRNA_intronic	Alu-SINE
1-153605657	ENSG00000285867_-	Amnion	Male	up_sites	0.0227452	ncRNA_intronic	Alu-SINE
1-153605703	ENSG00000285867_-	Amnion	Male	up_sites	0.0131345	ncRNA_intronic	Alu-SINE
1-153605737	ENSG00000285867_-	Chorion	Male	Han_sites	-	ncRNA_intronic	Alu-SINE
8-66455859	ENSG00000285791_-	Villus of Fetal	Male	up_sites	0.00193766	intronic	Alu-SINE
19-12671434	ENSG00000285589_-	Villus of Intermediate	Male	down_sites	0.00927133	UTR3	Alu-SINE
22-41676896	ENSG00000285531_-	Villus of Maternal	Male	Han_sites	-	ncRNA_exonic	-
22-39019867	ENSG00000284554_-	Umbilical Cord	Male	up_sites	0.0035926	UTR3	Alu-SINE
22-39019886	ENSG00000284554_-	Chorion	Male	up_sites	0.00597396	UTR3	Alu-SINE
22-39019906	ENSG00000284554_-	Chorionic Plate	Male	up_sites	0.00204848	UTR3	Alu-SINE
16-81030731	ENSG00000284512_-	Villus of Maternal	Male	Han_sites	-	ncRNA_intronic	Alu-SINE
1-100023951	ENSG00000283761_-	Chorion	Male	up_sites	0.0485707	UTR3	Alu-SINE
9-137610465	ENSG00000283411_-	Villus of Fetal	Male	down_sites	0.0275806	ncRNA_intronic	Alu-SINE
9-137611300	ENSG00000283411_-	Amnion	Male	up_sites	0.00895677	ncRNA_intronic	Alu-SINE
7-17345106	ENSG00000283321_-	Amnion	Male	up_sites	0.00289833	UTR3	Alu-SINE
7-17345194	ENSG00000283321_-	Amnion	Male	up_sites	0.00139333	UTR3	Alu-SINE
3-49423656	ENSG00000283189_-	Chorion	Male	up_sites	0.0445526	UTR3	Alu-SINE
3-49423887	ENSG00000283189_-	Umbilical Cord	Male	up_sites	0.02077	UTR3	Alu-SINE
3-49423987	ENSG00000283189_-	Villus of Maternal	Male	Han_sites	-	UTR3	Alu-SINE
3-49424070	ENSG00000283189_-	Chorionic Plate	Male	up_sites	0.00547064	UTR3	Alu-SINE
12-8888004	ENSG00000282022_-	Amnion	Male	up_sites	0.0140789	ncRNA_intronic	Alu-SINE
2-233866463	ENSG00000279809_-	Chorionic Plate	Male	up_sites	0.0330666	ncRNA_exonic	-
2-233866966	ENSG00000279809_-	Amnion	Male	up_sites	0.00910721	ncRNA_exonic	-
2-233866966	ENSG00000279809_-	Villus of Fetal	Male	up_sites	0.0272374	ncRNA_exonic	-
2-233866993	ENSG00000279809_-	Amnion	Male	up_sites	0.0405762	ncRNA_exonic	-
2-233867035	ENSG00000279809_-	Villus of Fetal	Male	up_sites	0.009709	ncRNA_exonic	-
2-233867085	ENSG00000279809_-	Chorionic Plate	Male	up_sites	0.0159655	ncRNA_exonic	-
2-233867085	ENSG00000279809_-	Villus of Intermediate	Male	up_sites	0.0305039	ncRNA_exonic	-
2-233867117	ENSG00000279809_-	Amnion	Male	up_sites	0.0439484	ncRNA_exonic	-
2-233867117	ENSG00000279809_-	Chorionic Plate	Male	up_sites	0.0358712	ncRNA_exonic	-
2-233867118	ENSG00000279809_-	Amnion	Male	up_sites	0.043829	ncRNA_exonic	-
2-233867255	ENSG00000279809_-	Chorionic Plate	Male	up_sites	0.0273339	ncRNA_exonic	-
19-1372712	ENSG00000279488_-	Chorionic Plate	Male	up_sites	0.00582188	ncRNA_exonic	Alu-SINE
19-44665523	ENSG00000279095_-	Chorion	Male	up_sites	0.0110814	ncRNA_exonic	Alu-SINE
19-44665527	ENSG00000279095_-	Villus of Maternal	Male	down_sites	0.0354653	ncRNA_exonic	Alu-SINE
22-37944643	ENSG00000278948_-	Chorionic Plate	Male	up_sites	0.000378925	ncRNA_exonic	Alu-SINE
22-37944672	ENSG00000278948_-	Chorionic Plate	Male	up_sites	0.0351623	ncRNA_exonic	Alu-SINE
22-37944743	ENSG00000278948_-	Chorion	Male	Han_sites	-	ncRNA_exonic	Alu-SINE
16-31122918	ENSG00000278133_-	Chorionic Plate	Male	up_sites	0.0107034	ncRNA_intronic	Alu-SINE
16-31123108	ENSG00000278133_-	Umbilical Cord	Male	up_sites	0.0217913	ncRNA_intronic	Alu-SINE
16-31123310	ENSG00000278133_-	Umbilical Cord	Male	up_sites	0.000277757	ncRNA_intronic	Alu-SINE
16-31123786	ENSG00000278133_-	Amnion	Male	up_sites	0.0204892	ncRNA_exonic	Alu-SINE
17-68134969	ENSG00000277476_-	Villus of Intermediate	Male	up_sites	0.0302324	ncRNA_exonic	-
17-68134990	ENSG00000277476_-	Amnion	Male	down_sites	0.0401636	ncRNA_exonic	-
17-68135384	ENSG00000277476_-	Chorion	Male	up_sites	0.00494594	ncRNA_exonic	-
17-68135387	ENSG00000277476_-	Chorion	Male	up_sites	0.0020716	ncRNA_exonic	-
17-68135387	ENSG00000277476_-	Chorionic Plate	Male	up_sites	0.0380696	ncRNA_exonic	-
17-68135389	ENSG00000277476_-	Chorion	Male	up_sites	0.00811256	ncRNA_exonic	-
15-90275566	ENSG00000275674_-	Amnion	Male	up_sites	0.0123998	ncRNA_exonic	-
15-90275577	ENSG00000275674_-	Amnion	Male	up_sites	0.0271365	ncRNA_exonic	-
7-66554118	ENSG00000275400_-	Amnion	Male	up_sites	0.00264751	ncRNA_exonic	-
7-66554119	ENSG00000275400_-	Chorionic Plate	Male	up_sites	0.00398755	ncRNA_exonic	-
7-128457726	ENSG00000273184_-	Umbilical Cord	Male	Tibetan_sites	-	ncRNA_intronic	Alu-SINE
7-128465066	ENSG00000273184_-	Chorion	Male	down_sites	0.0261751	ncRNA_intronic	Alu-SINE
7-128470014	ENSG00000273184_-	Amnion	Male	up_sites	0.00854701	ncRNA_intronic	Alu-SINE
7-128470116	ENSG00000273184_-	Amnion	Male	down_sites	0.0461345	ncRNA_intronic	Alu-SINE
7-99568441	ENSG00000272647_-	Villus of Fetal	Male	up_sites	0.0431948	intronic	Alu-SINE
22-20890638	ENSG00000272600_-	Chorion	Male	Han_sites	-	ncRNA_intronic	Alu-SINE
17-35827293	ENSG00000270871_-	Chorionic Plate	Male	up_sites	0.02677	ncRNA_intronic	Alu-SINE
1-160998026	ENSG00000270149_-	Amnion	Male	up_sites	0.0206185	UTR3	Alu-SINE
1-160998100	ENSG00000270149_-	Amnion	Male	up_sites	0.00224081	UTR3	Alu-SINE
11-47168659	ENSG00000270060_-	Chorion	Male	up_sites	0.0224294	ncRNA_intronic	Alu-SINE
19-57907125	ENSG00000269476_-	Chorionic Plate	Male	up_sites	0.0484619	UTR3	Alu-SINE
19-16641691	ENSG00000269427_-	Umbilical Cord	Male	up_sites	0.00175827	ncRNA_intronic	Alu-SINE
19-46336919	ENSG00000269124_-	Umbilical Cord	Male	up_sites	0.00889136	ncRNA_intronic	Alu-SINE
19-40827754	ENSG00000268797_-	Villus of Intermediate	Male	up_sites	0.0259321	intronic	Alu-SINE
19-16641691	ENSG00000268790_-	Umbilical Cord	Male	up_sites	0.00175827	ncRNA_intronic	Alu-SINE
19-57844380	ENSG00000268750_-	Chorion	Male	Han_sites	-	UTR3	Alu-SINE
1-1729519	ENSG00000268575_-	Umbilical Cord	Male	up_sites	0.00392011	ncRNA_intronic	Alu-SINE
1-1729519	ENSG00000268575_-	Villus of Fetal	Male	up_sites	0.00400053	ncRNA_intronic	Alu-SINE
1-1729519	ENSG00000268575_-	Villus of Intermediate	Male	up_sites	0.0352515	ncRNA_intronic	Alu-SINE
1-1731255	ENSG00000268575_-	Chorion	Male	Han_sites	-	ncRNA_exonic	Alu-SINE
22-20065403	ENSG00000268292_-	Umbilical Cord	Male	up_sites	0.00609149	ncRNA_intronic	Alu-SINE
19-53012380	ENSG00000267943_-	Villus of Maternal	Male	Han_sites	-	ncRNA_exonic	Alu-SINE
19-13773247	ENSG00000267633_-	Villus of Fetal	Male	Han_sites	-	ncRNA_intronic	Alu-SINE
19-13773701	ENSG00000267633_-	Chorion	Male	up_sites	0.0155203	ncRNA_intronic	Alu-SINE
19-13773855	ENSG00000267633_-	Amnion	Male	up_sites	0.00969079	ncRNA_exonic	Alu-SINE
17-75944794	ENSG00000267615_-	Amnion	Male	up_sites	0.00495953	ncRNA_intronic	Alu-SINE
18-12031703	ENSG00000267480_-	Chorion	Male	Han_sites	-	ncRNA_exonic	Alu-SINE
19-37792481	ENSG00000267422_-	Villus of Fetal	Male	up_sites	0.0169284	ncRNA_exonic	-
19-37792481	ENSG00000267422_-	Villus of Maternal	Male	up_sites	0.0358441	ncRNA_exonic	-
17-68134969	ENSG00000267352_-	Villus of Intermediate	Male	up_sites	0.0302324	ncRNA_exonic	-
17-68134990	ENSG00000267352_-	Amnion	Male	down_sites	0.0401636	ncRNA_exonic	-
17-68135384	ENSG00000267352_-	Chorion	Male	up_sites	0.00494594	ncRNA_exonic	-
17-68135387	ENSG00000267352_-	Chorion	Male	up_sites	0.0020716	ncRNA_exonic	-
17-68135387	ENSG00000267352_-	Chorionic Plate	Male	up_sites	0.0380696	ncRNA_exonic	-
17-68135389	ENSG00000267352_-	Chorion	Male	up_sites	0.00811256	ncRNA_exonic	-
19-55039275	ENSG00000267265_-	Chorion	Male	up_sites	0.00456646	ncRNA_intronic	Alu-SINE
19-55039287	ENSG00000267265_-	Chorion	Male	up_sites	0.0138348	ncRNA_intronic	Alu-SINE
19-55040227	ENSG00000267265_-	Amnion	Male	up_sites	0.0139023	ncRNA_intronic	Alu-SINE
19-55040291	ENSG00000267265_-	Amnion	Male	Tibetan_sites	-	ncRNA_intronic	Alu-SINE
19-55043556	ENSG00000267265_-	Amnion	Male	up_sites	0.00396628	ncRNA_intronic	Alu-SINE
19-55043616	ENSG00000267265_-	Amnion	Male	up_sites	0.00151141	ncRNA_intronic	Alu-SINE
19-55039275	ENSG00000267149_-	Chorion	Male	up_sites	0.00456646	ncRNA_intronic	Alu-SINE
19-55039287	ENSG00000267149_-	Chorion	Male	up_sites	0.0138348	ncRNA_intronic	Alu-SINE
19-55040227	ENSG00000267149_-	Amnion	Male	up_sites	0.0139023	ncRNA_intronic	Alu-SINE
19-55040291	ENSG00000267149_-	Amnion	Male	Tibetan_sites	-	ncRNA_intronic	Alu-SINE
19-55043556	ENSG00000267149_-	Amnion	Male	up_sites	0.00396628	ncRNA_intronic	Alu-SINE
19-55043616	ENSG00000267149_-	Amnion	Male	up_sites	0.00151141	ncRNA_intronic	Alu-SINE
19-1582040	ENSG00000267059_-	Villus of Fetal	Male	Han_sites	-	intronic	Alu-SINE
19-1587539	ENSG00000267059_-	Villus of Fetal	Male	up_sites	0.00301582	intronic	Alu-SINE
19-35770769	ENSG00000267049_-	Villus of Maternal	Male	down_sites	0.0229793	ncRNA_exonic	Alu-SINE
17-68134969	ENSG00000267023_-	Villus of Intermediate	Male	up_sites	0.0302324	ncRNA_exonic	-
17-68134990	ENSG00000267023_-	Amnion	Male	down_sites	0.0401636	ncRNA_exonic	-
17-68135384	ENSG00000267023_-	Chorion	Male	up_sites	0.00494594	ncRNA_exonic	-
17-68135387	ENSG00000267023_-	Chorion	Male	up_sites	0.0020716	ncRNA_exonic	-
17-68135387	ENSG00000267023_-	Chorionic Plate	Male	up_sites	0.0380696	ncRNA_exonic	-
17-68135389	ENSG00000267023_-	Chorion	Male	up_sites	0.00811256	ncRNA_exonic	-
17-68424794	ENSG00000267009_-	Villus of Intermediate	Male	up_sites	0.0155247	ncRNA_intronic	Alu-SINE
16-4750617	ENSG00000266994_-	Umbilical Cord	Male	up_sites	0.00846158	ncRNA_intronic	Alu-SINE
17-42559127	ENSG00000266929_-	Chorionic Plate	Male	up_sites	0.0320393	ncRNA_intronic	Alu-SINE
17-42559310	ENSG00000266929_-	Chorionic Plate	Male	up_sites	0.026826	ncRNA_intronic	Alu-SINE
19-44665523	ENSG00000266903_-	Chorion	Male	up_sites	0.0110814	ncRNA_exonic	Alu-SINE
19-44665527	ENSG00000266903_-	Villus of Maternal	Male	down_sites	0.0354653	ncRNA_exonic	Alu-SINE
17-64751217	ENSG00000266820_-	Amnion	Male	up_sites	0.0217544	ncRNA_exonic	-
17-64751217	ENSG00000265298_-	Amnion	Male	up_sites	0.0217544	ncRNA_exonic	-
17-82577305	ENSG00000265136_-	Villus of Intermediate	Male	up_sites	0.0291919	ncRNA_exonic	-
18-318578	ENSG00000264514_-	Villus of Fetal	Male	Han_sites	-	ncRNA_intronic	Alu-SINE
18-318630	ENSG00000264514_-	Chorionic Plate	Male	up_sites	0.0136758	ncRNA_intronic	Alu-SINE
18-67507104	ENSG00000263424_-	Chorion	Male	up_sites	0.0310557	ncRNA_intronic	Alu-SINE
18-67507252	ENSG00000263424_-	Chorionic Plate	Male	up_sites	0.00545019	ncRNA_intronic	Alu-SINE
16-9110970	ENSG00000263244_-	Chorion	Male	up_sites	0.0165399	ncRNA_exonic	Alu-SINE
6-31672531	ENSG00000263020_-	Amnion	Male	up_sites	0.00802694	UTR3	Alu-SINE
6-31673146	ENSG00000263020_-	Amnion	Male	up_sites	0.0081059	UTR3	Alu-SINE
6-31673155	ENSG00000263020_-	Chorion	Male	up_sites	0.0138915	UTR3	Alu-SINE
6-31673181	ENSG00000263020_-	Amnion	Male	up_sites	0.0248376	UTR3	Alu-SINE
6-31673198	ENSG00000263020_-	Amnion	Male	up_sites	0.00606879	UTR3	Alu-SINE
6-31673207	ENSG00000263020_-	Amnion	Male	up_sites	0.0262525	UTR3	Alu-SINE
10-27248551	ENSG00000262412_-	Chorionic Plate	Male	Han_sites	-	ncRNA_exonic	-
10-27248568	ENSG00000262412_-	Villus of Fetal	Male	Han_sites	-	ncRNA_exonic	-
16-75445426	ENSG00000261717_-	Umbilical Cord	Male	up_sites	0.0288635	UTR3	Alu-SINE
16-75445572	ENSG00000261717_-	Chorionic Plate	Male	up_sites	0.0129972	UTR3	Alu-SINE
16-75445576	ENSG00000261717_-	Amnion	Male	up_sites	0.0059213	UTR3	Alu-SINE
16-75446075	ENSG00000261717_-	Umbilical Cord	Male	up_sites	0.0219507	UTR3	Alu-SINE
16-69306869	ENSG00000260914_-	Chorion	Male	Han_sites	-	UTR3	Alu-SINE
16-50105833	ENSG00000260381_-	Villus of Intermediate	Male	down_sites	0.0435075	ncRNA_intronic	Alu-SINE
16-81030731	ENSG00000260213_-	Villus of Maternal	Male	Han_sites	-	ncRNA_intronic	Alu-SINE
14-22972939	ENSG00000259132_-	Chorion	Male	up_sites	0.0256924	UTR3	-
14-22972941	ENSG00000259132_-	Chorion	Male	up_sites	0.0359799	UTR3	-
14-50327645	ENSG00000259071_-	Chorion	Male	up_sites	0.0134494	ncRNA_intronic	Alu-SINE
14-52775933	ENSG00000259049_-	Amnion	Male	up_sites	0.0128791	ncRNA_exonic	Alu-SINE
14-52775933	ENSG00000259049_-	Chorion	Male	up_sites	0.0158231	ncRNA_exonic	Alu-SINE
14-52776688	ENSG00000259049_-	Chorion	Male	up_sites	0.016621	ncRNA_intronic	Alu-SINE
14-52776693	ENSG00000259049_-	Amnion	Male	up_sites	0.0106465	ncRNA_intronic	Alu-SINE
14-52776827	ENSG00000259049_-	Umbilical Cord	Male	up_sites	0.0391738	ncRNA_intronic	Alu-SINE
14-100835286	ENSG00000258663_-	Chorionic Plate	Male	Han_sites	-	ncRNA_exonic	-
14-100366778	ENSG00000258581_-	Chorionic Plate	Male	Han_sites	-	ncRNA_exonic	-
10-117485758	ENSG00000258114_-	Umbilical Cord	Male	up_sites	0.00373858	ncRNA_exonic	Alu-SINE
12-132126692	ENSG00000256804_-	Villus of Fetal	Male	down_sites	0.0388189	ncRNA_exonic	-
14-103681524	ENSG00000256500_-	Amnion	Male	up_sites	0.0117076	intronic	Alu-SINE
14-103681576	ENSG00000256500_-	Amnion	Male	up_sites	0.0176478	intronic	Alu-SINE
14-103682255	ENSG00000256500_-	Amnion	Male	up_sites	0.033992	intronic	Alu-SINE
14-103682430	ENSG00000256500_-	Chorion	Male	up_sites	0.034919	ncRNA_exonic	Alu-SINE
14-103682538	ENSG00000256500_-	Amnion	Male	up_sites	0.00318103	ncRNA_exonic	Alu-SINE
14-103682554	ENSG00000256500_-	Amnion	Male	up_sites	0.0437934	ncRNA_exonic	Alu-SINE
14-103682604	ENSG00000256500_-	Amnion	Male	up_sites	0.0155955	ncRNA_exonic	Alu-SINE
16-10529893	ENSG00000256013_-	Amnion	Male	up_sites	0.0100833	ncRNA_intronic	Alu-SINE
16-10531468	ENSG00000256013_-	Amnion	Male	up_sites	0.00566573	ncRNA_intronic	Alu-SINE
16-10531469	ENSG00000256013_-	Amnion	Male	up_sites	0.00538345	ncRNA_intronic	Alu-SINE
16-10531549	ENSG00000256013_-	Amnion	Male	up_sites	0.0064658	ncRNA_intronic	Alu-SINE
16-10531557	ENSG00000256013_-	Amnion	Male	up_sites	0.0160955	ncRNA_intronic	Alu-SINE
11-126295135	ENSG00000255062_-	Villus of Maternal	Male	up_sites	0.0207205	ncRNA_intronic	Alu-SINE
8-43020843	ENSG00000254673_-	Chorion	Male	up_sites	0.0293219	UTR3	Alu-SINE
8-43020981	ENSG00000254673_-	Villus of Fetal	Male	up_sites	0.0136827	UTR3	Alu-SINE
8-43021749	ENSG00000254673_-	Umbilical Cord	Male	up_sites	0.0145314	UTR3	Alu-SINE
8-43023091	ENSG00000254673_-	Umbilical Cord	Male	up_sites	0.00371845	UTR3	Alu-SINE
10-28525595	ENSG00000254635_-	Chorion	Male	up_sites	0.0115119	ncRNA_intronic	Alu-SINE
8-120055787	ENSG00000254343_-	Umbilical Cord	Male	up_sites	0.0158328	ncRNA_intronic	Alu-SINE
8-94792288	ENSG00000254307_-	Chorion	Male	up_sites	0.0189681	ncRNA_exonic	Alu-SINE
8-94792377	ENSG00000254307_-	Amnion	Male	up_sites	0.0367245	ncRNA_intronic	Alu-SINE
8-94792387	ENSG00000254307_-	Chorionic Plate	Male	up_sites	0.00549438	ncRNA_intronic	Alu-SINE
8-94792413	ENSG00000254307_-	Chorion	Male	Han_sites	-	ncRNA_intronic	Alu-SINE
8-94792431	ENSG00000254307_-	Villus of Maternal	Male	up_sites	0.0311302	ncRNA_intronic	Alu-SINE
8-94792834	ENSG00000254307_-	Chorion	Male	up_sites	0.0012679	ncRNA_exonic	Alu-SINE
8-39971909	ENSG00000253939_-	Villus of Intermediate	Male	Han_sites	-	ncRNA_intronic	Alu-SINE
8-39985114	ENSG00000253939_-	Villus of Intermediate	Male	up_sites	0.0228313	ncRNA_intronic	Alu-SINE
4-3948699	ENSG00000253917_-	Villus of Maternal	Male	up_sites	0.0385603	ncRNA_intronic	Alu-SINE
8-38970748	ENSG00000253645_-	Chorion	Male	up_sites	0.00501102	ncRNA_intronic	Alu-SINE
8-47511265	ENSG00000253330_-	Villus of Intermediate	Male	up_sites	0.0127765	ncRNA_exonic	-
8-47511992	ENSG00000253330_-	Villus of Fetal	Male	up_sites	0.0138451	ncRNA_exonic	-
8-47511995	ENSG00000253330_-	Villus of Fetal	Male	up_sites	0.00965695	ncRNA_exonic	-
4-86914237	ENSG00000251411_-	Chorionic Plate	Male	down_sites	0.00441977	ncRNA_exonic	-
4-86914291	ENSG00000251411_-	Chorionic Plate	Male	down_sites	0.00770059	ncRNA_exonic	-
4-86914291	ENSG00000251411_-	Villus of Fetal	Male	down_sites	0.00528838	ncRNA_exonic	-
20-34246151	ENSG00000250917_-	Villus of Fetal	Male	Tibetan_sites	-	ncRNA_exonic	-
7-107628705	ENSG00000250474_-	Villus of Fetal	Male	Han_sites	-	ncRNA_exonic	-
5-142037060	ENSG00000250347_-	Chorion	Male	Han_sites	-	ncRNA_exonic	-
5-142037062	ENSG00000250347_-	Chorion	Male	Han_sites	-	ncRNA_exonic	-
4-86876372	ENSG00000250202_-	Villus of Maternal	Male	up_sites	0.00478572	ncRNA_exonic	-
4-2938420	ENSG00000249673_-	Chorion	Male	up_sites	0.0167471	ncRNA_intronic	Alu-SINE
4-2938620	ENSG00000249673_-	Chorion	Male	up_sites	0.00563619	ncRNA_intronic	Alu-SINE
4-2938670	ENSG00000249673_-	Amnion	Male	up_sites	0.00382009	ncRNA_intronic	Alu-SINE
21-33591895	ENSG00000249209_-	Umbilical Cord	Male	up_sites	0.0280093	intronic	Alu-SINE
21-33592807	ENSG00000249209_-	Chorionic Plate	Male	up_sites	0.0359799	intronic	Alu-SINE
17-49939453	ENSG00000249176_-	Villus of Intermediate	Male	Han_sites	-	ncRNA_exonic	-
14-103682430	ENSG00000246451_-	Chorion	Male	up_sites	0.034919	ncRNA_exonic	Alu-SINE
14-103682538	ENSG00000246451_-	Amnion	Male	up_sites	0.00318103	ncRNA_exonic	Alu-SINE
14-103682554	ENSG00000246451_-	Amnion	Male	up_sites	0.0437934	ncRNA_exonic	Alu-SINE
14-103682604	ENSG00000246451_-	Amnion	Male	up_sites	0.0155955	ncRNA_exonic	Alu-SINE
8-98043209	ENSG00000245970_-	Amnion	Male	up_sites	0.0198668	ncRNA_exonic	Alu-SINE
8-98043405	ENSG00000245970_-	Villus of Intermediate	Male	Han_sites	-	ncRNA_intronic	Alu-SINE
15-50360681	ENSG00000244879_-	Villus of Maternal	Male	up_sites	0.0143763	ncRNA_exonic	Alu-SINE
15-50368452	ENSG00000244879_-	Villus of Fetal	Male	down_sites	0.0184827	ncRNA_exonic	Alu-SINE
7-128661170	ENSG00000242588_-	Chorion	Male	Han_sites	-	ncRNA_exonic	Alu-SINE
3-179398270	ENSG00000242539_-	Umbilical Cord	Male	up_sites	0.0200559	ncRNA_intronic	Alu-SINE
3-156044857	ENSG00000242017_-	Chorion	Male	Han_sites	-	ncRNA_exonic	-
2-99195984	ENSG00000241962_-	Amnion	Male	up_sites	0.00330691	UTR3	Alu-SINE
2-99196345	ENSG00000241962_-	Chorionic Plate	Male	up_sites	0.0469158	UTR3	Alu-SINE
X-131795803	ENSG00000241418_-	Chorionic Plate	Male	up_sites	0.00209395	ncRNA_exonic	-
X-131795856	ENSG00000241418_-	Chorionic Plate	Male	up_sites	0.0131222	ncRNA_exonic	-
1-9984252	ENSG00000241326_-	Chorion	Male	Han_sites	-	ncRNA_intronic	Alu-SINE
11-2129619	ENSG00000240801_-	Amnion	Male	Han_sites	-	ncRNA_intronic	-
7-128457726	ENSG00000240758_-	Umbilical Cord	Male	Tibetan_sites	-	ncRNA_intronic	Alu-SINE
7-128465066	ENSG00000240758_-	Chorion	Male	down_sites	0.0261751	ncRNA_intronic	Alu-SINE
1-1317934	ENSG00000240731_-	Amnion	Male	up_sites	0.0097386	ncRNA_intronic	Alu-SINE
1-1318006	ENSG00000240731_-	Chorion	Male	up_sites	0.0190536	ncRNA_intronic	Alu-SINE
3-179260422	ENSG00000240429_-	Villus of Maternal	Male	Han_sites	-	ncRNA_exonic	-
3-179260444	ENSG00000240429_-	Villus of Fetal	Male	Han_sites	-	ncRNA_exonic	-
3-179260875	ENSG00000240429_-	Chorion	Male	Han_sites	-	ncRNA_exonic	-
3-179260887	ENSG00000240429_-	Chorion	Male	Han_sites	-	ncRNA_exonic	-
X-40832160	ENSG00000237661_-	Villus of Fetal	Male	Han_sites	-	ncRNA_exonic	-
22-20065403	ENSG00000236540_-	Umbilical Cord	Male	up_sites	0.00609149	ncRNA_intronic	Alu-SINE
20-34246151	ENSG00000236456_-	Villus of Fetal	Male	Tibetan_sites	-	ncRNA_exonic	-
9-128112324	ENSG00000234771_-	Villus of Fetal	Male	Tibetan_sites	-	ncRNA_exonic	Alu-SINE
7-66526481	ENSG00000234500_-	Chorion	Male	up_sites	0.0225082	ncRNA_exonic	Alu-SINE
7-66527255	ENSG00000234500_-	Chorion	Male	down_sites	0.0159761	ncRNA_exonic	Alu-SINE
7-56176141	ENSG00000233028_-	Villus of Fetal	Male	down_sites	0.0492808	ncRNA_exonic	-
2-206116967	ENSG00000231955_-	Chorion	Male	up_sites	0.0206817	ncRNA_intronic	Alu-SINE
2-206116975	ENSG00000231955_-	Umbilical Cord	Male	up_sites	0.0160361	ncRNA_intronic	Alu-SINE
2-206119005	ENSG00000231955_-	Chorionic Plate	Male	Han_sites	-	ncRNA_intronic	Alu-SINE
17-20589576	ENSG00000231258_-	Umbilical Cord	Male	down_sites	0.00198098	ncRNA_exonic	-
17-20589577	ENSG00000231258_-	Umbilical Cord	Male	down_sites	0.0021677	ncRNA_exonic	-
17-20589580	ENSG00000231258_-	Umbilical Cord	Male	down_sites	0.0125362	ncRNA_exonic	-
17-20589583	ENSG00000231258_-	Umbilical Cord	Male	down_sites	0.001506	ncRNA_exonic	-
17-20589618	ENSG00000231258_-	Umbilical Cord	Male	down_sites	0.0124004	ncRNA_exonic	-
17-20589620	ENSG00000231258_-	Umbilical Cord	Male	down_sites	0.00575315	ncRNA_exonic	-
17-20589628	ENSG00000231258_-	Umbilical Cord	Male	down_sites	0.00220993	ncRNA_exonic	-
3-45680563	ENSG00000230530_-	Amnion	Male	up_sites	0.0104033	ncRNA_intronic	Alu-SINE
3-45680889	ENSG00000230530_-	Amnion	Male	up_sites	0.016288	ncRNA_intronic	Alu-SINE
3-45680895	ENSG00000230530_-	Umbilical Cord	Male	up_sites	0.00047538	ncRNA_intronic	Alu-SINE
3-45680999	ENSG00000230530_-	Umbilical Cord	Male	up_sites	0.0274304	ncRNA_intronic	Alu-SINE
3-45681000	ENSG00000230530_-	Chorion	Male	up_sites	0.00192637	ncRNA_intronic	Alu-SINE
22-38723136	ENSG00000229598_-	Villus of Intermediate	Male	down_sites	0.0132277	ncRNA_exonic	-
22-38723309	ENSG00000229598_-	Villus of Maternal	Male	up_sites	0.0273379	ncRNA_exonic	-
13-110898975	ENSG00000229152_-	Chorion	Male	Han_sites	-	ncRNA_intronic	Alu-SINE
15-90275566	ENSG00000228998_-	Amnion	Male	up_sites	0.0123998	ncRNA_exonic	-
15-90275577	ENSG00000228998_-	Amnion	Male	up_sites	0.0271365	ncRNA_exonic	-
1-214351213	ENSG00000228470_-	Amnion	Male	up_sites	0.00611628	ncRNA_intronic	Alu-SINE
1-214351233	ENSG00000228470_-	Chorionic Plate	Male	up_sites	0.0335291	ncRNA_intronic	Alu-SINE
X-48580461	ENSG00000228343_-	Chorion	Male	up_sites	0.0442998	ncRNA_intronic	Alu-SINE
1-1729519	ENSG00000227775_-	Umbilical Cord	Male	up_sites	0.00392011	ncRNA_intronic	Alu-SINE
1-1729519	ENSG00000227775_-	Villus of Fetal	Male	up_sites	0.00400053	ncRNA_intronic	Alu-SINE
1-1729519	ENSG00000227775_-	Villus of Intermediate	Male	up_sites	0.0352515	ncRNA_intronic	Alu-SINE
1-1731255	ENSG00000227775_-	Chorion	Male	Han_sites	-	ncRNA_exonic	Alu-SINE
10-100232541	ENSG00000227492_-	Chorion	Male	up_sites	0.0100243	ncRNA_intronic	Alu-SINE
1-228115404	ENSG00000224566_-	Villus of Fetal	Male	Han_sites	-	ncRNA_exonic	-
19-14489425	ENSG00000224543_-	Amnion	Male	Han_sites	-	ncRNA_exonic	-
9-129285948	ENSG00000224307_-	Villus of Intermediate	Male	Han_sites	-	ncRNA_exonic	Alu-SINE
22-25649044	ENSG00000224003_-	Villus of Maternal	Male	Han_sites	-	ncRNA_exonic	-
21-33263899	ENSG00000223799_-	Umbilical Cord	Male	up_sites	0.00771335	ncRNA_exonic	Alu-SINE
21-33263955	ENSG00000223799_-	Chorion	Male	up_sites	0.00782803	ncRNA_exonic	Alu-SINE
21-33264783	ENSG00000223799_-	Villus of Maternal	Male	up_sites	0.0108665	ncRNA_exonic	Alu-SINE
X-134546392	ENSG00000223749_-	Villus of Fetal	Male	Han_sites	-	ncRNA_exonic	-
13-45031106	ENSG00000223732_-	Umbilical Cord	Male	down_sites	0.0145593	ncRNA_intronic	Alu-SINE
22-20450911	ENSG00000215493_-	Villus of Fetal	Male	down_sites	0.0288827	ncRNA_exonic	-
22-20450984	ENSG00000215493_-	Villus of Fetal	Male	down_sites	0.0388171	ncRNA_exonic	-
22-20451010	ENSG00000215493_-	Villus of Fetal	Male	down_sites	0.01684	ncRNA_exonic	-
22-20451011	ENSG00000215493_-	Villus of Fetal	Male	down_sites	0.00459587	ncRNA_exonic	-
22-20451106	ENSG00000215493_-	Villus of Fetal	Male	down_sites	0.0447014	ncRNA_exonic	-
13-45391129	ENSG00000214455_-	Amnion	Male	down_sites	0.0421584	ncRNA_exonic	-
13-45391137	ENSG00000214455_-	Amnion	Male	down_sites	0.0384246	ncRNA_exonic	-
MT-4264	ENSG00000210100_-	Umbilical Cord	Male	Han_sites	-	ncRNA_exonic	-
9-129506678	ENSG00000204054_-	Umbilical Cord	Male	up_sites	0.000525045	ncRNA_exonic	Alu-SINE
9-129506718	ENSG00000204054_-	Umbilical Cord	Male	up_sites	0.00968367	ncRNA_exonic	Alu-SINE
9-129508221	ENSG00000204054_-	Umbilical Cord	Male	up_sites	0.0159113	ncRNA_exonic	Alu-SINE
1-207768991	ENSG00000203709_-	Amnion	Male	up_sites	0.00657261	ncRNA_intronic	Alu-SINE
1-207769183	ENSG00000203709_-	Chorionic Plate	Male	up_sites	0.0317437	ncRNA_intronic	Alu-SINE
1-207769891	ENSG00000203709_-	Chorion	Male	up_sites	0.0341978	ncRNA_intronic	Alu-SINE
1-207769905	ENSG00000203709_-	Amnion	Male	up_sites	0.00163624	ncRNA_intronic	Alu-SINE
1-207769911	ENSG00000203709_-	Amnion	Male	up_sites	0.0214127	ncRNA_intronic	Alu-SINE
1-10459007	ENSG00000203469_-	Chorionic Plate	Male	up_sites	0.00680056	ncRNA_intronic	Alu-SINE
17-20589576	ENSG00000188013_-	Umbilical Cord	Male	down_sites	0.00198098	ncRNA_exonic	-
17-20589577	ENSG00000188013_-	Umbilical Cord	Male	down_sites	0.0021677	ncRNA_exonic	-
17-20589580	ENSG00000188013_-	Umbilical Cord	Male	down_sites	0.0125362	ncRNA_exonic	-
17-20589583	ENSG00000188013_-	Umbilical Cord	Male	down_sites	0.001506	ncRNA_exonic	-
17-20589618	ENSG00000188013_-	Umbilical Cord	Male	down_sites	0.0124004	ncRNA_exonic	-
17-20589620	ENSG00000188013_-	Umbilical Cord	Male	down_sites	0.00575315	ncRNA_exonic	-
17-20589628	ENSG00000188013_-	Umbilical Cord	Male	down_sites	0.00220993	ncRNA_exonic	-
17-15787425	ENSG00000179277_-	Amnion	Male	up_sites	0.0408827	ncRNA_exonic	-
13-45391129	ENSG00000170919_-	Amnion	Male	down_sites	0.0421584	ncRNA_exonic	-
13-45391137	ENSG00000170919_-	Amnion	Male	down_sites	0.0384246	ncRNA_exonic	-
19-16550468	ENSG00000141979_-	Chorion	Male	up_sites	0.0125169	UTR3	Alu-SINE
19-16550474	ENSG00000141979_-	Chorion	Male	up_sites	0.0356277	UTR3	Alu-SINE
19-16550480	ENSG00000141979_-	Amnion	Male	up_sites	0.00241018	UTR3	Alu-SINE
19-16550486	ENSG00000141979_-	Amnion	Male	up_sites	0.0220288	UTR3	Alu-SINE
19-16550487	ENSG00000141979_-	Amnion	Male	up_sites	0.0256924	UTR3	Alu-SINE
19-16550487	ENSG00000141979_-	Chorion	Male	up_sites	0.0115537	UTR3	Alu-SINE
19-16550548	ENSG00000141979_-	Amnion	Male	up_sites	0.0169305	UTR3	Alu-SINE
19-16550565	ENSG00000141979_-	Amnion	Male	up_sites	0.025817	UTR3	Alu-SINE
19-16550565	ENSG00000141979_-	Umbilical Cord	Male	up_sites	0.00654115	UTR3	Alu-SINE
19-16550568	ENSG00000141979_-	Amnion	Male	up_sites	0.0036844	UTR3	Alu-SINE
19-16550623	ENSG00000141979_-	Amnion	Male	Tibetan_sites	-	UTR3	Alu-SINE

## Sheet: 3
Supplementary table 3. Differential RNA editing sites in the placentas of female infants
RNA editing sites	Gene	Tissues	Sex	Diff_type	P value	Gene regions	Repeated sequence
1-52823875	ENSG00000162378_ZYG11B	Amnion	Female	up_sites	0.0206186	UTR3	Alu-SINE
1-52824087	ENSG00000162378_ZYG11B	Chorion	Female	up_sites	0.0100387	UTR3	Alu-SINE
19-23339828	ENSG00000167232_ZNF91	Villus of Fetal	Female	up_sites	0.0488002	intronic	Alu-SINE
19-52618557	ENSG00000167766_ZNF83	Villus of Fetal	Female	down_sites	0.0138072	ncRNA_intronic	Alu-SINE
19-52618557	ENSG00000167766_ZNF83	Villus of Intermediate	Female	down_sites	0.0111334	ncRNA_intronic	Alu-SINE
19-52642429	ENSG00000167766_ZNF83	Villus of Intermediate	Female	up_sites	0.00146291	intronic	Alu-SINE
19-52643649	ENSG00000167766_ZNF83	Amnion	Female	down_sites	0.00910721	intronic	Alu-SINE
19-57860381	ENSG00000204514_ZNF814	Umbilical Cord	Female	up_sites	0.0114962	UTR3	Alu-SINE
19-57860701	ENSG00000204514_ZNF814	Chorion	Female	up_sites	0.00699593	UTR3	Alu-SINE
19-57861379	ENSG00000204514_ZNF814	Amnion	Female	down_sites	0.0137208	UTR3	Alu-SINE
19-57863932	ENSG00000204514_ZNF814	Umbilical Cord	Female	down_sites	0.0294056	UTR3	Alu-SINE
19-57867785	ENSG00000204514_ZNF814	Chorionic Plate	Female	down_sites	0.0266407	ncRNA_intronic	Alu-SINE
19-57867810	ENSG00000204514_ZNF814	Chorion	Female	down_sites	0.0461345	ncRNA_intronic	Alu-SINE
19-40031359	ENSG00000128000_ZNF780B	Umbilical Cord	Female	down_sites	0.00816113	UTR3	Alu-SINE
19-21292228	ENSG00000182141_ZNF708	Villus of Maternal	Female	up_sites	0.0232531	UTR3	Alu-SINE
19-53012908	ENSG00000242779_ZNF702P	Villus of Maternal	Female	up_sites	0.028084	ncRNA_exonic	Alu-SINE
19-53012909	ENSG00000242779_ZNF702P	Villus of Intermediate	Female	up_sites	0.00299198	ncRNA_exonic	Alu-SINE
7-99567952	ENSG00000197343_ZNF655	Umbilical Cord	Female	Han_sites	-	intronic	Alu-SINE
7-99568008	ENSG00000197343_ZNF655	Umbilical Cord	Female	Han_sites	-	intronic	Alu-SINE
19-57844380	ENSG00000269343_ZNF587B	Chorionic Plate	Female	up_sites	0.00248862	UTR3	Alu-SINE
19-57860381	ENSG00000198466_ZNF587	Umbilical Cord	Female	up_sites	0.0114962	UTR3	Alu-SINE
19-57860701	ENSG00000198466_ZNF587	Chorion	Female	up_sites	0.00699593	UTR3	Alu-SINE
19-57861379	ENSG00000198466_ZNF587	Amnion	Female	down_sites	0.0137208	UTR3	Alu-SINE
19-57863932	ENSG00000198466_ZNF587	Umbilical Cord	Female	down_sites	0.0294056	UTR3	Alu-SINE
19-56378721	ENSG00000018869_ZNF582	Amnion	Female	up_sites	0.0370999	ncRNA_exonic	Alu-SINE
19-57364808	ENSG00000152433_ZNF547	Villus of Intermediate	Female	down_sites	0.0439236	UTR5	-
19-57364842	ENSG00000152433_ZNF547	Chorion	Female	up_sites	0.0285179	synonymous	-
19-11834401	ENSG00000171295_ZNF440	Chorionic Plate	Female	down_sites	0.0208438	UTR3	Alu-SINE
19-52063423	ENSG00000256087_ZNF432	Chorion	Female	up_sites	0.0348282	ncRNA_intronic	Alu-SINE
19-21190863	ENSG00000196705_ZNF431	Amnion	Female	up_sites	0.00113527	UTR3	Alu-SINE
19-21191330	ENSG00000196705_ZNF431	Amnion	Female	up_sites	0.0227467	UTR3	Alu-SINE
18-35247800	ENSG00000186812_ZNF397	Chorion	Female	up_sites	0.000941596	UTR3	Alu-SINE
19-37632978	ENSG00000120784_ZFP30	Chorion	Female	Han_sites	-	UTR3	Alu-SINE
19-13759540	ENSG00000104957_YJU2B	Villus of Intermediate	Female	Han_sites	-
19-13759677	ENSG00000104957_YJU2B	Villus of Maternal	Female	Han_sites	-	intronic	Alu-SINE
2-32308592	ENSG00000119820_YIPF4	Chorion	Female	up_sites	0.0114391	UTR3	Alu-SINE
2-32310622	ENSG00000119820_YIPF4	Chorion	Female	up_sites	0.0182982	UTR3	Alu-SINE
2-32310622	ENSG00000119820_YIPF4	Chorionic Plate	Female	Tibetan_sites	-	UTR3	Alu-SINE
2-32310623	ENSG00000119820_YIPF4	Chorion	Female	up_sites	0.0391315	UTR3	Alu-SINE
2-32310678	ENSG00000119820_YIPF4	Chorion	Female	up_sites	0.00619643	UTR3	Alu-SINE
12-64450291	ENSG00000184575_XPOT	Villus of Intermediate	Female	up_sites	0.00806601	UTR3	Alu-SINE
X-123912452	ENSG00000101966_XIAP	Villus of Fetal	Female	Han_sites	-	UTR3	Alu-SINE
17-27297691	ENSG00000109046_WSB1	Chorion	Female	up_sites	0.00583567	intronic	Alu-SINE
1-112494422	ENSG00000134245_WNT2B	Villus of Fetal	Female	up_sites	0.0319213	intronic	Alu-SINE
1-68162563	ENSG00000116729_WLS	Umbilical Cord	Female	Han_sites	-	ncRNA_exonic	-
17-68424791	ENSG00000070540_WIPI1	Chorion	Female	up_sites	0.0136491	ncRNA_intronic	Alu-SINE
17-40283521	ENSG00000171475_WIPF2	Chorion	Female	Tibetan_sites	-	UTR3	Alu-SINE
19-12671434	ENSG00000123154_WDR83	Chorionic Plate	Female	up_sites	0.0136361	UTR3	Alu-SINE
19-12671901	ENSG00000123154_WDR83	Villus of Fetal	Female	up_sites	0.029926	UTR3	Alu-SINE
15-84641599	ENSG00000177082_WDR73	Chorion	Female	up_sites	0.0270798	ncRNA_exonic	Alu-SINE
14-100366660	ENSG00000140105_WARS1	Villus of Fetal	Female	down_sites	0.0221845	ncRNA_exonic	-
14-100366675	ENSG00000140105_WARS1	Chorionic Plate	Female	down_sites	0.0343785	ncRNA_exonic	-
14-100366675	ENSG00000140105_WARS1	Villus of Fetal	Female	down_sites	0.00172779	ncRNA_exonic	-
14-100366682	ENSG00000140105_WARS1	Villus of Fetal	Female	down_sites	0.00121816	ncRNA_exonic	-
14-100366689	ENSG00000140105_WARS1	Chorionic Plate	Female	down_sites	0.0484976	ncRNA_exonic	-
14-100366689	ENSG00000140105_WARS1	Villus of Fetal	Female	down_sites	0.00539569	ncRNA_exonic	-
7-38723468	ENSG00000006715_VPS41	Amnion	Female	up_sites	0.0192308	UTR3	Alu-SINE
7-38724686	ENSG00000006715_VPS41	Villus of Fetal	Female	up_sites	0.0165911	UTR3	Alu-SINE
19-5909710	ENSG00000187650_VMAC	Chorion	Female	up_sites	0.00260106	UTR3	Alu-SINE
8-94491576	ENSG00000164944_VIRMA	Villus of Intermediate	Female	Han_sites	-	splicing	-
3-10152112	ENSG00000134086_VHL	Villus of Intermediate	Female	Han_sites	-	ncRNA_intronic	Alu-SINE
3-10152158	ENSG00000134086_VHL	Chorion	Female	up_sites	0.00528812	ncRNA_intronic	Alu-SINE
3-49317157	ENSG00000114316_USP4	Villus of Intermediate	Female	Han_sites	-	synonymous	-
3-49317234	ENSG00000114316_USP4	Villus of Intermediate	Female	Han_sites	-	non-synonymous	-
3-49322717	ENSG00000114316_USP4	Villus of Intermediate	Female	Han_sites	-	intronic	Alu-SINE
7-48104042	ENSG00000183696_UPP1	Chorion	Female	up_sites	0.0261751	intronic	Alu-SINE
7-48106573	ENSG00000183696_UPP1	Amnion	Female	down_sites	0.0474942	intronic	Alu-SINE
13-114284241	ENSG00000169062_UPF3A	Amnion	Female	up_sites	0.0207455	intronic	Alu-SINE
13-114284283	ENSG00000169062_UPF3A	Villus of Fetal	Female	down_sites	0.0360578	intronic	Alu-SINE
2-128193062	ENSG00000136731_UGGT1	Chorion	Female	up_sites	0.00555445	UTR3	Alu-SINE
2-128193345	ENSG00000136731_UGGT1	Umbilical Cord	Female	up_sites	0.0430893	UTR3	Alu-SINE
2-128193355	ENSG00000136731_UGGT1	Villus of Fetal	Female	up_sites	0.0162466	UTR3	Alu-SINE
2-128194210	ENSG00000136731_UGGT1	Villus of Intermediate	Female	up_sites	0.0112682	UTR3	Alu-SINE
4-39533053	ENSG00000249348_UGDH-AS1	Villus of Intermediate	Female	Han_sites	-	ncRNA_intronic	Alu-SINE
4-39549388	ENSG00000249348_UGDH-AS1	Villus of Intermediate	Female	up_sites	0.00395216	ncRNA_intronic	Alu-SINE
2-24002671	ENSG00000173960_UBXN2A	Chorion	Female	Tibetan_sites	-	UTR3	Alu-SINE
X-119538506	ENSG00000077721_UBE2A	Chorion	Female	up_sites	0.00369513	UTR3	Alu-SINE
X-119538562	ENSG00000077721_UBE2A	Amnion	Female	up_sites	0.0158583	UTR3	Alu-SINE
3-132678840	ENSG00000081307_UBA5	Umbilical Cord	Female	Han_sites	-	UTR3	Alu-SINE
3-132678859	ENSG00000081307_UBA5	Umbilical Cord	Female	Han_sites	-	UTR3	Alu-SINE
19-10352196	ENSG00000105397_TYK2	Chorionic Plate	Female	down_sites	0.0404722	intronic	Alu-SINE
5-134900927	ENSG00000113621_TXNDC15	Villus of Intermediate	Female	up_sites	0.0418151	UTR3	Alu-SINE
18-12323765	ENSG00000176014_TUBB6	Umbilical Cord	Female	up_sites	0.0136544	intronic	Alu-SINE
3-9818486	ENSG00000214021_TTLL3	Amnion	Female	down_sites	0.00786463	UTR5	Alu-SINE
11-62739518	ENSG00000162222_TTC9C	Villus of Maternal	Female	up_sites	0.027178	intronic	Alu-SINE
X-101009593	ENSG00000188917_TRMT2B	Chorion	Female	up_sites	0.0100085	UTR3	Alu-SINE
19-12732662	ENSG00000123144_TRIR	Villus of Maternal	Female	up_sites	0.0232902	intronic	Alu-SINE
19-6747243	ENSG00000125733_TRIP10	Amnion	Female	Tibetan_sites	-	intronic	Alu-SINE
15-44733569	ENSG00000185880_TRIM69	Villus of Maternal	Female	up_sites	0.0232531	intronic	Alu-SINE
19-57364808	ENSG00000256060_TRAPPC2B	Villus of Intermediate	Female	down_sites	0.0439236	UTR5	-
19-57364842	ENSG00000256060_TRAPPC2B	Chorion	Female	up_sites	0.0285179	synonymous	-
16-3660826	ENSG00000126602_TRAP1	Villus of Intermediate	Female	up_sites	0.0424187	UTR3	Alu-SINE
19-16080628	ENSG00000167460_TPM4	Chorion	Female	up_sites	0.00201414	intronic	Alu-SINE
19-16080691	ENSG00000167460_TPM4	Chorion	Female	up_sites	0.0126032	intronic	Alu-SINE
19-16080692	ENSG00000167460_TPM4	Chorion	Female	up_sites	0.00180064	intronic	Alu-SINE
19-16080764	ENSG00000167460_TPM4	Chorion	Female	up_sites	0.0389421	intronic	Alu-SINE
19-4654585	ENSG00000185361_TNFAIP8L1	Chorion	Female	up_sites	0.049943	UTR3	Alu-SINE
15-51913957	ENSG00000138594_TMOD3	Villus of Intermediate	Female	down_sites	0.0441357	UTR3	Alu-SINE
15-51914973	ENSG00000138594_TMOD3	Umbilical Cord	Female	Han_sites	-	UTR3	Alu-SINE
11-8972911	ENSG00000254860_TMEM9B-AS1	Villus of Intermediate	Female	up_sites	0.038139	ncRNA_intronic	Alu-SINE
21-33433106	ENSG00000142188_TMEM50B	Umbilical Cord	Female	up_sites	0.0324285	intronic	Alu-SINE
11-9291872	ENSG00000166471_TMEM41B	Villus of Intermediate	Female	Han_sites	-	intronic	Alu-SINE
12-55834374	ENSG00000182796_TMEM198B	Chorion	Female	Han_sites	-	ncRNA_intronic	Alu-SINE
12-55834381	ENSG00000182796_TMEM198B	Villus of Maternal	Female	Han_sites	-	ncRNA_intronic	Alu-SINE
12-55834511	ENSG00000182796_TMEM198B	Umbilical Cord	Female	up_sites	0.00926363	ncRNA_intronic	Alu-SINE
12-55834541	ENSG00000182796_TMEM198B	Villus of Maternal	Female	down_sites	0.0318328	ncRNA_intronic	Alu-SINE
4-165075214	ENSG00000170088_TMEM192	Chorion	Female	up_sites	0.0270867	UTR3	Alu-SINE
4-165075533	ENSG00000170088_TMEM192	Villus of Maternal	Female	down_sites	0.0133773	UTR3	Alu-SINE
16-75445412	ENSG00000166822_TMEM170A	Umbilical Cord	Female	up_sites	0.00727746	UTR3	Alu-SINE
16-75446009	ENSG00000166822_TMEM170A	Villus of Maternal	Female	up_sites	0.00133386	UTR3	Alu-SINE
12-121777086	ENSG00000188735_TMEM120B	Chorion	Female	up_sites	0.0049178	UTR3	Alu-SINE
12-121777095	ENSG00000188735_TMEM120B	Chorion	Female	up_sites	0.0463914	UTR3	Alu-SINE
17-43218611	ENSG00000184988_TMEM106A	Chorion	Female	Han_sites	-	UTR3	Alu-SINE
17-43219638	ENSG00000184988_TMEM106A	Villus of Fetal	Female	Han_sites	-	UTR3	Alu-SINE
17-1707153	ENSG00000185561_TLCD2	Umbilical Cord	Female	up_sites	0.00579466	UTR3	Alu-SINE
10-119572378	ENSG00000151923_TIAL1	Chorion	Female	up_sites	0.0371697	UTR3	Alu-SINE
10-119572450	ENSG00000151923_TIAL1	Villus of Maternal	Female	up_sites	0.0166222	UTR3	Alu-SINE
10-119572555	ENSG00000151923_TIAL1	Umbilical Cord	Female	up_sites	0.00788418	UTR3	Alu-SINE
10-119572588	ENSG00000151923_TIAL1	Villus of Intermediate	Female	up_sites	0.0246192	UTR3	Alu-SINE
10-119572676	ENSG00000151923_TIAL1	Chorion	Female	up_sites	0.0208526	UTR3	Alu-SINE
1-155203900	ENSG00000231064_THBS3-AS1	Chorion	Female	up_sites	0.015925	ncRNA_intronic	Alu-SINE
1-155203900	ENSG00000169231_THBS3	Chorion	Female	up_sites	0.015925	ncRNA_intronic	Alu-SINE
3-141945212	ENSG00000114126_TFDP2	Villus of Intermediate	Female	up_sites	0.00439451	UTR3	Alu-SINE
3-141945268	ENSG00000114126_TFDP2	Chorion	Female	Han_sites	-	UTR3	Alu-SINE
14-20367119	ENSG00000129566_TEP1	Villus of Fetal	Female	up_sites	0.0248456	UTR3	Alu-SINE
19-3539995	ENSG00000183397_TEKTIP1	Umbilical Cord	Female	up_sites	0.0191064	intronic	Alu-SINE
19-3540318	ENSG00000183397_TEKTIP1	Umbilical Cord	Female	up_sites	0.0103738	intronic	Alu-SINE
6-33301317	ENSG00000231925_TAPBP	Umbilical Cord	Female	Han_sites	-	UTR3	Alu-SINE
11-93735426	ENSG00000166012_TAF1D	Chorion	Female	up_sites	0.0205046	intronic	Alu-SINE
11-93735478	ENSG00000166012_TAF1D	Chorion	Female	up_sites	0.0317427	intronic	Alu-SINE
X-71420214	ENSG00000147133_TAF1	Villus of Intermediate	Female	Han_sites	-	ncRNA_exonic	-
17-37477647	ENSG00000276234_TADA2A	Chorionic Plate	Female	down_sites	0.0189001	UTR3	Alu-SINE
17-37477732	ENSG00000276234_TADA2A	Villus of Intermediate	Female	up_sites	0.0245196	UTR3	Alu-SINE
X-30836660	ENSG00000157625_TAB3	Villus of Fetal	Female	up_sites	0.00811256	UTR3	Alu-SINE
17-37515696	ENSG00000275066_SYNRG	Umbilical Cord	Female	up_sites	0.0383317	UTR3	Alu-SINE
17-37517042	ENSG00000275066_SYNRG	Chorion	Female	up_sites	0.0270932	UTR3	Alu-SINE
19-45860342	ENSG00000125755_SYMPK	Villus of Fetal	Female	up_sites	0.018401	intronic	Alu-SINE
7-880140	ENSG00000164828_SUN1	Villus of Fetal	Female	up_sites	0.0370864	ncRNA_exonic	Alu-SINE
7-880218	ENSG00000164828_SUN1	Amnion	Female	down_sites	0.0231486	ncRNA_exonic	Alu-SINE
7-880218	ENSG00000164828_SUN1	Villus of Maternal	Female	up_sites	0.00368774	ncRNA_exonic	Alu-SINE
7-880964	ENSG00000164828_SUN1	Villus of Maternal	Female	up_sites	0.0231105	ncRNA_exonic	Alu-SINE
16-31040857	ENSG00000103496_STX4	Chorion	Female	up_sites	0.00530185	downstream	Alu-SINE
20-45078229	ENSG00000101109_STK4	Chorion	Female	up_sites	0.0302709	UTR3	Alu-SINE
20-45078299	ENSG00000101109_STK4	Chorion	Female	up_sites	6.91699e-05	UTR3	Alu-SINE
20-45078306	ENSG00000101109_STK4	Villus of Intermediate	Female	up_sites	0.0110382	UTR3	Alu-SINE
20-45078309	ENSG00000101109_STK4	Chorion	Female	up_sites	0.00768423	UTR3	Alu-SINE
20-45079118	ENSG00000101109_STK4	Chorion	Female	up_sites	0.00285002	UTR3	Alu-SINE
20-45079201	ENSG00000101109_STK4	Amnion	Female	up_sites	0.0273179	UTR3	Alu-SINE
X-119538506	ENSG00000018610_STEEP1	Chorion	Female	up_sites	0.00369513	UTR3	Alu-SINE
X-119538562	ENSG00000018610_STEEP1	Amnion	Female	up_sites	0.0158583	UTR3	Alu-SINE
3-156540349	ENSG00000114850_SSR3	Chorionic Plate	Female	Han_sites	-	ncRNA_exonic	Alu-SINE
3-156541581	ENSG00000114850_SSR3	Villus of Intermediate	Female	Han_sites	-	UTR3	Alu-SINE
1-225788288	ENSG00000143742_SRP9	Villus of Intermediate	Female	Han_sites	-	intronic	Alu-SINE
1-225788292	ENSG00000143742_SRP9	Umbilical Cord	Female	up_sites	0.0295127	intronic	Alu-SINE
1-225788349	ENSG00000143742_SRP9	Chorion	Female	Han_sites	-	intronic	Alu-SINE
1-225788563	ENSG00000143742_SRP9	Umbilical Cord	Female	up_sites	0.0159647	intronic	Alu-SINE
13-49913257	ENSG00000123178_SPRYD7	Chorion	Female	up_sites	0.033225	UTR3	Alu-SINE
13-49913805	ENSG00000123178_SPRYD7	Amnion	Female	up_sites	0.00597884	UTR3	Alu-SINE
15-50703428	ENSG00000138600_SPPL2A	Villus of Maternal	Female	up_sites	0.00872025	UTR3	Alu-SINE
15-50703435	ENSG00000138600_SPPL2A	Villus of Maternal	Female	up_sites	0.0407843	UTR3	Alu-SINE
15-50703459	ENSG00000138600_SPPL2A	Umbilical Cord	Female	up_sites	0.0145155	UTR3	Alu-SINE
15-50703459	ENSG00000138600_SPPL2A	Villus of Maternal	Female	up_sites	0.00759177	UTR3	Alu-SINE
15-50703491	ENSG00000138600_SPPL2A	Chorion	Female	Han_sites	-	UTR3	Alu-SINE
15-50703590	ENSG00000138600_SPPL2A	Villus of Fetal	Female	up_sites	0.0159453	UTR3	Alu-SINE
15-50704080	ENSG00000138600_SPPL2A	Chorion	Female	up_sites	0.0167045	UTR3	Alu-SINE
15-50704086	ENSG00000138600_SPPL2A	Chorion	Female	up_sites	0.0187098	UTR3	Alu-SINE
15-50704098	ENSG00000138600_SPPL2A	Villus of Fetal	Female	up_sites	0.0251883	UTR3	Alu-SINE
15-50704108	ENSG00000138600_SPPL2A	Chorion	Female	up_sites	0.0410319	UTR3	Alu-SINE
15-50704132	ENSG00000138600_SPPL2A	Chorion	Female	up_sites	0.0106941	UTR3	Alu-SINE
15-50704298	ENSG00000138600_SPPL2A	Amnion	Female	up_sites	0.0176943	UTR3	Alu-SINE
15-50705258	ENSG00000138600_SPPL2A	Villus of Intermediate	Female	up_sites	0.0247074	UTR3	Alu-SINE
15-50707224	ENSG00000138600_SPPL2A	Umbilical Cord	Female	up_sites	0.0133684	UTR3	Alu-SINE
15-50707251	ENSG00000138600_SPPL2A	Villus of Fetal	Female	down_sites	0.0217759	UTR3	Alu-SINE
17-20317595	ENSG00000128487_SPECC1	Umbilical Cord	Female	Han_sites	-	ncRNA_intronic	Alu-SINE
4-176331637	ENSG00000129128_SPCS3	Villus of Fetal	Female	Han_sites	-	UTR3	Alu-SINE
20-36781401	ENSG00000149639_SOGA1	Umbilical Cord	Female	up_sites	0.0202205	UTR3	Alu-SINE
20-36782112	ENSG00000149639_SOGA1	Amnion	Female	up_sites	0.0453271	UTR3	Alu-SINE
12-93542929	ENSG00000246985_SOCS2-AS1	Villus of Fetal	Female	down_sites	0.0346385	ncRNA_exonic	Alu-SINE
20-45837902	ENSG00000124104_SNX21	Umbilical Cord	Female	up_sites	0.041049	intronic	Alu-SINE
20-45838643	ENSG00000124104_SNX21	Umbilical Cord	Female	up_sites	0.0110083	intronic	Alu-SINE
22-24574708	ENSG00000100028_SNRPD3	Villus of Fetal	Female	Han_sites	-	UTR3	Alu-SINE
22-24574716	ENSG00000100028_SNRPD3	Umbilical Cord	Female	Han_sites	-	UTR3	Alu-SINE
17-1781124	ENSG00000186532_SMYD4	Umbilical Cord	Female	up_sites	0.00409621	UTR3	Alu-SINE
2-130159035	ENSG00000136699_SMPD4	Umbilical Cord	Female	Han_sites	-	intronic	Alu-SINE
2-130159454	ENSG00000136699_SMPD4	Umbilical Cord	Female	Han_sites	-	intronic	Alu-SINE
19-16634605	ENSG00000214046_SMIM7	Umbilical Cord	Female	up_sites	0.040551	ncRNA_exonic	Alu-SINE
19-16634683	ENSG00000214046_SMIM7	Umbilical Cord	Female	up_sites	0.0455348	ncRNA_exonic	Alu-SINE
19-16640821	ENSG00000214046_SMIM7	Umbilical Cord	Female	Han_sites	-	ncRNA_intronic	Alu-SINE
19-16640833	ENSG00000214046_SMIM7	Umbilical Cord	Female	Han_sites	-	ncRNA_intronic	Alu-SINE
4-39549388	ENSG00000163683_SMIM14	Villus of Intermediate	Female	up_sites	0.00395216	ncRNA_intronic	Alu-SINE
17-81248096	ENSG00000157637_SLC38A10	Villus of Maternal	Female	up_sites	0.027313	intronic	Alu-SINE
2-113707620	ENSG00000115084_SLC35F5	Chorion	Female	up_sites	0.0237897	UTR3	Alu-SINE
2-113707656	ENSG00000115084_SLC35F5	Chorion	Female	up_sites	0.00342188	UTR3	Alu-SINE
2-113708698	ENSG00000115084_SLC35F5	Amnion	Female	up_sites	0.0209882	UTR3	Alu-SINE
2-113710654	ENSG00000115084_SLC35F5	Umbilical Cord	Female	up_sites	0.0147176	UTR3	Alu-SINE
2-113712552	ENSG00000115084_SLC35F5	Umbilical Cord	Female	up_sites	0.00965418	UTR3	Alu-SINE
1-1663592	ENSG00000189339_SLC35E2B	Villus of Intermediate	Female	Han_sites	-	UTR3	Alu-SINE
1-1664101	ENSG00000189339_SLC35E2B	Chorion	Female	up_sites	0.0168809	UTR3	Alu-SINE
19-16550487	ENSG00000127526_SLC35E1	Amnion	Female	up_sites	0.00895699	UTR3	Alu-SINE
12-7970384	ENSG00000059804_SLC2A3	Chorion	Female	up_sites	0.0167376	ncRNA_intronic	Alu-SINE
12-7970452	ENSG00000059804_SLC2A3	Chorion	Female	up_sites	0.0323444	ncRNA_intronic	Alu-SINE
12-7970530	ENSG00000059804_SLC2A3	Chorion	Female	up_sites	0.0456708	ncRNA_intronic	Alu-SINE
5-149983749	ENSG00000155850_SLC26A2	Amnion	Female	Tibetan_sites	-	UTR3	Alu-SINE
12-98605298	ENSG00000075415_SLC25A3	Chorion	Female	Han_sites	-	UTR3	Alu-SINE
12-98606012	ENSG00000075415_SLC25A3	Chorion	Female	up_sites	0.0146896	UTR3	Alu-SINE
6-46657080	ENSG00000153291_SLC25A27	Umbilical Cord	Female	Han_sites	-	intronic	Alu-SINE
10-68479561	ENSG00000122912_SLC25A16	Chorion	Female	Han_sites	-	UTR3	Alu-SINE
10-68518652	ENSG00000122912_SLC25A16	Villus of Maternal	Female	Han_sites	-	intronic	Alu-SINE
8-42533472	ENSG00000168575_SLC20A2	Chorionic Plate	Female	down_sites	0.0294667	intronic	Alu-SINE
17-75099628	ENSG00000170190_SLC16A5	Villus of Fetal	Female	up_sites	0.0211399	intronic	Alu-SINE
17-75099674	ENSG00000170190_SLC16A5	Villus of Intermediate	Female	up_sites	0.0137978	intronic	Alu-SINE
7-100855192	ENSG00000146828_SLC12A9	Villus of Fetal	Female	Tibetan_sites	-	intronic	Alu-SINE
7-100855356	ENSG00000146828_SLC12A9	Amnion	Female	up_sites	0.0042654	intronic	Alu-SINE
15-34231279	ENSG00000140199_SLC12A6	Chorion	Female	up_sites	0.0083446	UTR3	Alu-SINE
15-34231754	ENSG00000140199_SLC12A6	Chorion	Female	up_sites	0.0155168	UTR3	Alu-SINE
19-51518505	ENSG00000105492_SIGLEC6	Chorion	Female	up_sites	0.00869894	UTR3	Alu-SINE
15-48879140	ENSG00000185634_SHC4	Chorion	Female	Han_sites	-	UTR3	-
15-48879140	ENSG00000185634_SHC4	Umbilical Cord	Female	Han_sites	-	UTR3	-
1-36328673	ENSG00000214193_SH3D21	Umbilical Cord	Female	up_sites	0.0370887	UTR3	Alu-SINE
1-67409176	ENSG00000142864_SERBP1	Umbilical Cord	Female	down_sites	0.0323255	UTR3	Alu-SINE
11-43898444	ENSG00000213693_SEC14L1P1	Chorion	Female	down_sites	0.039789	ncRNA_exonic	-
6-70588989	ENSG00000154079_SDHAF4	Villus of Maternal	Female	up_sites	0.0371915	UTR3	Alu-SINE
6-70589265	ENSG00000154079_SDHAF4	Amnion	Female	up_sites	0.0475641	UTR3	Alu-SINE
6-70589270	ENSG00000154079_SDHAF4	Villus of Fetal	Female	Han_sites	-	UTR3	Alu-SINE
8-26380822	ENSG00000228451_SDAD1P1	Umbilical Cord	Female	Tibetan_sites	-	ncRNA_exonic	-
12-124783736	ENSG00000073060_SCARB1	Chorion	Female	up_sites	0.04269	intronic	Alu-SINE
19-1916559	ENSG00000227500_SCAMP4	Villus of Intermediate	Female	Han_sites	-
6-158974979	ENSG00000130363_RSPH3	Chorion	Female	down_sites	0.0167472	UTR3	Alu-SINE
6-43029689	ENSG00000124541_RRP36	Chorion	Female	up_sites	0.00711675	intronic	Alu-SINE
6-43029800	ENSG00000124541_RRP36	Villus of Intermediate	Female	up_sites	0.0366343	intronic	Alu-SINE
6-43030761	ENSG00000124541_RRP36	Chorion	Female	up_sites	0.00141455	intronic	Alu-SINE
19-41871486	ENSG00000105372_RPS19	Chorion	Female	up_sites	0.000565012	UTR3	Alu-SINE
19-41871559	ENSG00000105372_RPS19	Villus of Intermediate	Female	up_sites	0.0215753	UTR3	Alu-SINE
2-216502196	ENSG00000197756_RPL37A	Amnion	Female	up_sites	0.00176024	UTR3	Alu-SINE
2-216502198	ENSG00000197756_RPL37A	Chorionic Plate	Female	down_sites	0.00522456	UTR3	Alu-SINE
2-216502206	ENSG00000197756_RPL37A	Amnion	Female	up_sites	0.00863643	UTR3	Alu-SINE
12-110461136	ENSG00000241680_RPL31P49	Villus of Maternal	Female	Han_sites	-	ncRNA_exonic	-
11-8687278	ENSG00000166441_RPL27A	Villus of Intermediate	Female	down_sites	0.00146958	UTR3	Alu-SINE
19-58584082	ENSG00000213753_RPL23AP79	Amnion	Female	up_sites	0.0120955	ncRNA_exonic	Alu-SINE
7-5686040	ENSG00000011275_RNF216	Umbilical Cord	Female	down_sites	0.0219507	intronic	Alu-SINE
17-80320453	ENSG00000173821_RNF213	Chorion	Female	down_sites	0.0291604	UTR3	Alu-SINE
17-80320928	ENSG00000173821_RNF213	Villus of Intermediate	Female	up_sites	0.0181246	UTR3	Alu-SINE
18-32068979	ENSG00000101695_RNF125	Villus of Intermediate	Female	Han_sites	-	ncRNA_intronic	Alu-SINE
1-145746037	ENSG00000265491_RNF115	Chorion	Female	Han_sites	-	UTR3	Alu-SINE
20-49943935	ENSG00000124226_RNF114	Villus of Maternal	Female	down_sites	0.0453661	intronic	Alu-SINE
5-95792538	ENSG00000164292_RHOBTB3	Chorionic Plate	Female	down_sites	0.00113378	intronic	Alu-SINE
7-151503389	ENSG00000106615_RHEB	Villus of Intermediate	Female	Han_sites	-	ncRNA_exonic	-
19-11394898	ENSG00000205517_RGL3	Umbilical Cord	Female	Han_sites	-	intronic	Alu-SINE
19-55039287	ENSG00000160439_RDH13	Chorion	Female	up_sites	0.00371621	ncRNA_intronic	Alu-SINE
19-55040353	ENSG00000160439_RDH13	Chorion	Female	up_sites	0.0250705	ncRNA_intronic	Alu-SINE
19-55040363	ENSG00000160439_RDH13	Chorion	Female	up_sites	0.0188727	ncRNA_intronic	Alu-SINE
19-55040422	ENSG00000160439_RDH13	Chorion	Female	up_sites	0.0160652	ncRNA_intronic	Alu-SINE
3-15072774	ENSG00000131381_RBSN	Umbilical Cord	Female	up_sites	0.00222884	ncRNA_intronic	Alu-SINE
3-15072811	ENSG00000131381_RBSN	Umbilical Cord	Female	Han_sites	-	ncRNA_intronic	Alu-SINE
1-88982873	ENSG00000213516_RBMXL1	Amnion	Female	down_sites	0.0310188	synonymous	-
1-145921980	ENSG00000265241_RBM8A	Amnion	Female	up_sites	0.0364159	ncRNA_intronic	Alu-SINE
1-145923014	ENSG00000265241_RBM8A	Chorion	Female	up_sites	0.00372284	ncRNA_intronic	Alu-SINE
X-48578374	ENSG00000102317_RBM3	Villus of Intermediate	Female	up_sites	0.0168469	UTR3	Alu-SINE
X-48578498	ENSG00000102317_RBM3	Chorion	Female	up_sites	0.00951781	UTR3	Alu-SINE
X-48578498	ENSG00000102317_RBM3	Chorionic Plate	Female	up_sites	0.0231105	UTR3	Alu-SINE
11-64738578	ENSG00000068831_RASGRP2	Chorion	Female	up_sites	0.0139956	intronic	Alu-SINE
6-149821202	ENSG00000285991_RAET1E	Villus of Fetal	Female	up_sites	0.00366987	ncRNA_intronic	Alu-SINE
6-149822258	ENSG00000285991_RAET1E	Chorionic Plate	Female	up_sites	0.00450423	ncRNA_intronic	Alu-SINE
6-149824694	ENSG00000285991_RAET1E	Amnion	Female	up_sites	0.00424001	ncRNA_intronic	Alu-SINE
6-149825758	ENSG00000285991_RAET1E	Chorionic Plate	Female	up_sites	0.0167116	ncRNA_intronic	Alu-SINE
7-16864729	ENSG00000232400_RAD17P1	Amnion	Female	up_sites	0.0351594	ncRNA_exonic	-
17-5382859	ENSG00000029725_RABEP1	Chorion	Female	Han_sites	-	intronic	Alu-SINE
14-21460419	ENSG00000129472_RAB2B	Villus of Fetal	Female	up_sites	0.0250869	UTR3	Alu-SINE
1-156067852	ENSG00000132698_RAB25	Villus of Intermediate	Female	Han_sites	-	intronic	Alu-SINE
1-156067895	ENSG00000132698_RAB25	Amnion	Female	up_sites	0.0324592	intronic	Alu-SINE
10-27538999	ENSG00000099246_RAB18	Chorion	Female	Han_sites	-	UTR3	-
19-45703567	ENSG00000011478_QPCTL	Chorion	Female	up_sites	0.00379024	UTR3	Alu-SINE
21-44869498	ENSG00000183255_PTTG1IP	Umbilical Cord	Female	Han_sites	-	intronic	Alu-SINE
1-214351153	ENSG00000152104_PTPN14	Villus of Intermediate	Female	up_sites	0.0454776	ncRNA_intronic	Alu-SINE
16-57182827	ENSG00000172775_PSME3IP1	Villus of Fetal	Female	up_sites	0.0487582	intronic	Alu-SINE
17-67338740	ENSG00000197170_PSMD12	Umbilical Cord	Female	up_sites	0.00830344	UTR3	Alu-SINE
17-67338751	ENSG00000197170_PSMD12	Umbilical Cord	Female	up_sites	0.00485143	UTR3	Alu-SINE
1-35602630	ENSG00000126067_PSMB2	Chorionic Plate	Female	down_sites	0.00838557	UTR3	Alu-SINE
19-35770266	ENSG00000167595_PROSER3	Chorion	Female	up_sites	0.00939551	ncRNA_intronic	Alu-SINE
19-35770756	ENSG00000167595_PROSER3	Villus of Intermediate	Female	up_sites	0.0177271	ncRNA_exonic	Alu-SINE
19-35770783	ENSG00000167595_PROSER3	Villus of Fetal	Female	up_sites	0.0342219	ncRNA_exonic	Alu-SINE
2-178445823	ENSG00000180228_PRKRA	Umbilical Cord	Female	Han_sites	-	intronic	Alu-SINE
1-2171495	ENSG00000067606_PRKCZ	Chorionic Plate	Female	down_sites	0.0273922	intronic	Alu-SINE
3-48750251	ENSG00000114302_PRKAR2A	Umbilical Cord	Female	up_sites	0.0190162	UTR3	Alu-SINE
22-50442676	ENSG00000100239_PPP6R2	Villus of Intermediate	Female	up_sites	0.0191744	intronic	Alu-SINE
19-45393185	ENSG00000104881_PPP1R13L	Villus of Intermediate	Female	up_sites	0.00212485	intronic	Alu-SINE
19-45394745	ENSG00000104881_PPP1R13L	Chorion	Female	Tibetan_sites	-	intronic	Alu-SINE
19-45394952	ENSG00000104881_PPP1R13L	Chorion	Female	up_sites	0.0291968	intronic	Alu-SINE
19-45394961	ENSG00000104881_PPP1R13L	Chorion	Female	Tibetan_sites	-	intronic	Alu-SINE
19-45394988	ENSG00000104881_PPP1R13L	Villus of Intermediate	Female	up_sites	0.0319766	intronic	Alu-SINE
3-184363875	ENSG00000163882_POLR2H	Umbilical Cord	Female	Han_sites	-	intronic	Alu-SINE
3-184363953	ENSG00000163882_POLR2H	Amnion	Female	up_sites	0.0120664	intronic	Alu-SINE
X-153677104	ENSG00000130822_PNCK	Chorion	Female	Tibetan_sites	-	intronic	Alu-SINE
10-20286805	ENSG00000120594_PLXDC2	Umbilical Cord	Female	up_sites	0.0081017	UTR3	Alu-SINE
10-20286842	ENSG00000120594_PLXDC2	Umbilical Cord	Female	up_sites	0.0280739	UTR3	Alu-SINE
12-45173626	ENSG00000134297_PLEKHA8P1	Chorion	Female	up_sites	0.0295667	ncRNA_exonic	-
12-45173919	ENSG00000134297_PLEKHA8P1	Chorionic Plate	Female	up_sites	0.0495413	ncRNA_exonic	-
12-45173919	ENSG00000134297_PLEKHA8P1	Villus of Fetal	Female	up_sites	0.00137118	ncRNA_exonic	-
12-45174662	ENSG00000134297_PLEKHA8P1	Villus of Fetal	Female	up_sites	0.0207647	ncRNA_exonic	-
X-279654	ENSG00000182378_PLCXD1	Villus of Intermediate	Female	down_sites	0.00965013	intronic	Alu-SINE
X-280088	ENSG00000182378_PLCXD1	Villus of Intermediate	Female	up_sites	0.0115822	intronic	Alu-SINE
X-299548	ENSG00000182378_PLCXD1	Chorion	Female	up_sites	0.00466016	UTR3	Alu-SINE
8-22257418	ENSG00000254064_PIWIL2-DT	Umbilical Cord	Female	Han_sites	-	ncRNA_intronic	Alu-SINE
22-31642369	ENSG00000241878_PISD	Villus of Intermediate	Female	Han_sites	-
1-151201414	ENSG00000143398_PIP5K1A	Villus of Intermediate	Female	Han_sites	-
1-20648008	ENSG00000117242_PINK1-AS	Chorion	Female	up_sites	0.0125817	ncRNA_intronic	Alu-SINE
1-20649625	ENSG00000117242_PINK1-AS	Umbilical Cord	Female	Han_sites	-	ncRNA_exonic	Alu-SINE
1-20648008	ENSG00000158828_PINK1	Chorion	Female	up_sites	0.0125817	ncRNA_intronic	Alu-SINE
1-20649625	ENSG00000158828_PINK1	Umbilical Cord	Female	Han_sites	-	ncRNA_exonic	Alu-SINE
19-49451759	ENSG00000104872_PIH1D1	Villus of Intermediate	Female	Han_sites	-	UTR5	-
5-126625956	ENSG00000164902_PHAX	Chorion	Female	up_sites	0.00730332	UTR3	Alu-SINE
1-28498819	ENSG00000204138_PHACTR4	Amnion	Female	up_sites	0.00200942	UTR3	Alu-SINE
1-28498921	ENSG00000204138_PHACTR4	Villus of Fetal	Female	up_sites	0.00915998	UTR3	Alu-SINE
1-28498954	ENSG00000204138_PHACTR4	Villus of Fetal	Female	up_sites	0.0309822	UTR3	Alu-SINE
1-28498993	ENSG00000204138_PHACTR4	Villus of Intermediate	Female	Han_sites	-	UTR3	Alu-SINE
1-28499519	ENSG00000204138_PHACTR4	Villus of Fetal	Female	up_sites	0.0477787	UTR3	Alu-SINE
1-28499638	ENSG00000204138_PHACTR4	Chorion	Female	Tibetan_sites	-	UTR3	Alu-SINE
17-78422615	ENSG00000087157_PGS1	Chorion	Female	up_sites	0.0151631	intronic	Alu-SINE
19-18368075	ENSG00000130517_PGPEP1	Umbilical Cord	Female	up_sites	0.0239597	UTR3	Alu-SINE
19-18368360	ENSG00000130517_PGPEP1	Umbilical Cord	Female	Han_sites	-	UTR3	Alu-SINE
12-132721380	ENSG00000247077_PGAM5	Villus of Fetal	Female	down_sites	0.014976	UTR3	Alu-SINE
2-61049653	ENSG00000162928_PEX13	Chorion	Female	up_sites	0.00938171	UTR3	Alu-SINE
2-61049699	ENSG00000162928_PEX13	Umbilical Cord	Female	up_sites	0.0354355	UTR3	Alu-SINE
20-50118731	ENSG00000124208_PEDS1-UBE2V1	Umbilical Cord	Female	up_sites	0.0437413	UTR3	Alu-SINE
20-50118731	ENSG00000240849_PEDS1	Umbilical Cord	Female	up_sites	0.0437413	UTR3	Alu-SINE
17-64322264	ENSG00000261371_PECAM1	Villus of Fetal	Female	up_sites	0.0140751	UTR3	Alu-SINE
21-43724584	ENSG00000160209_PDXK	Villus of Maternal	Female	up_sites	0.0306066	intronic	Alu-SINE
21-43724595	ENSG00000160209_PDXK	Villus of Intermediate	Female	Han_sites	-
21-43725735	ENSG00000160209_PDXK	Villus of Maternal	Female	up_sites	0.00401636	intronic	Alu-SINE
21-43729738	ENSG00000160209_PDXK	Villus of Fetal	Female	down_sites	0.0168514	intronic	Alu-SINE
21-43729797	ENSG00000160209_PDXK	Villus of Fetal	Female	down_sites	0.00351861	intronic	Alu-SINE
21-43730255	ENSG00000160209_PDXK	Villus of Intermediate	Female	down_sites	0.00844465	intronic	Alu-SINE
21-43730255	ENSG00000160209_PDXK	Villus of Maternal	Female	up_sites	0.0297177	intronic	Alu-SINE
3-136331561	ENSG00000114054_PCCB	Villus of Fetal	Female	up_sites	0.0496417	intronic	Alu-SINE
3-136331946	ENSG00000114054_PCCB	Villus of Intermediate	Female	Han_sites	-
1-25867175	ENSG00000182749_PAQR7	Villus of Intermediate	Female	up_sites	0.00926363	intronic	Alu-SINE
1-176616473	ENSG00000116183_PAPPA2	Villus of Fetal	Female	down_sites	0.0118053	ncRNA_exonic	-
9-116236399	ENSG00000182752_PAPPA	Chorionic Plate	Female	up_sites	0.0366835	intronic	Alu-SINE
11-73303598	ENSG00000171631_P2RY6	Villus of Maternal	Female	down_sites	0.0112056	UTR3	Alu-SINE
15-41302414	ENSG00000247556_OIP5-AS1	Umbilical Cord	Female	Han_sites	-	ncRNA_exonic	Alu-SINE
10-101789723	ENSG00000198408_OGA	Umbilical Cord	Female	Han_sites	-	intronic	Alu-SINE
10-101811186	ENSG00000198408_OGA	Umbilical Cord	Female	Han_sites	-	intronic	Alu-SINE
17-5382859	ENSG00000108559_NUP88	Chorion	Female	Han_sites	-	intronic	Alu-SINE
5-37290391	ENSG00000113569_NUP155	Chorion	Female	up_sites	0.0224534	UTR3	Alu-SINE
11-8972911	ENSG00000175352_NRIP3	Villus of Intermediate	Female	up_sites	0.038139	ncRNA_intronic	Alu-SINE
17-81562828	ENSG00000182446_NPLOC4	Chorion	Female	Han_sites	-	UTR3	Alu-SINE
3-132678840	ENSG00000274810_NPHP3-ACAD11	Umbilical Cord	Female	Han_sites	-	UTR3	Alu-SINE
3-132678859	ENSG00000274810_NPHP3-ACAD11	Umbilical Cord	Female	Han_sites	-	UTR3	Alu-SINE
2-130230074	ENSG00000213225_NOC2LP1	Villus of Maternal	Female	down_sites	0.0239967	ncRNA_exonic	-
2-130230106	ENSG00000213225_NOC2LP1	Villus of Maternal	Female	down_sites	0.030767	ncRNA_exonic	-
2-130230122	ENSG00000213225_NOC2LP1	Chorionic Plate	Female	down_sites	0.0256835	ncRNA_exonic	-
2-130230122	ENSG00000213225_NOC2LP1	Villus of Maternal	Female	down_sites	0.00608788	ncRNA_exonic	-
2-130230844	ENSG00000213225_NOC2LP1	Villus of Fetal	Female	up_sites	0.0165096	ncRNA_exonic	-
2-130231577	ENSG00000213225_NOC2LP1	Villus of Intermediate	Female	up_sites	0.0166039	ncRNA_exonic	-
1-9982985	ENSG00000173614_NMNAT1	Villus of Intermediate	Female	Han_sites	-	UTR3	Alu-SINE
19-54991644	ENSG00000022556_NLRP2	Villus of Fetal	Female	up_sites	0.00420858	intronic	Alu-SINE
19-54992769	ENSG00000022556_NLRP2	Villus of Intermediate	Female	up_sites	0.0452661	intronic	Alu-SINE
19-54993018	ENSG00000022556_NLRP2	Chorionic Plate	Female	down_sites	0.00554331	intronic	Alu-SINE
17-5512209	ENSG00000091592_NLRP1	Villus of Intermediate	Female	Han_sites	-	ncRNA_exonic	-
3-49423494	ENSG00000145029_NICN1	Amnion	Female	up_sites	0.0111642	UTR3	Alu-SINE
3-49423513	ENSG00000145029_NICN1	Umbilical Cord	Female	up_sites	0.0299848	UTR3	Alu-SINE
3-49423594	ENSG00000145029_NICN1	Umbilical Cord	Female	up_sites	0.0083331	UTR3	Alu-SINE
3-49423958	ENSG00000145029_NICN1	Umbilical Cord	Female	up_sites	0.00442901	UTR3	Alu-SINE
3-49424054	ENSG00000145029_NICN1	Umbilical Cord	Female	up_sites	0.0485497	UTR3	Alu-SINE
16-28955119	ENSG00000176953_NFATC2IP	Umbilical Cord	Female	Han_sites	-	ncRNA_intronic	Alu-SINE
16-28955357	ENSG00000176953_NFATC2IP	Chorion	Female	up_sites	0.0163283	ncRNA_intronic	Alu-SINE
15-75353280	ENSG00000140398_NEIL1	Chorion	Female	up_sites	0.0125276	intronic	Alu-SINE
11-65440055	ENSG00000245532_NEAT1	Villus of Maternal	Female	Han_sites	-	ncRNA_exonic	Alu-SINE
21-42908141	ENSG00000160194_NDUFV3	Villus of Fetal	Female	up_sites	0.00596188	intronic	Alu-SINE
21-42911096	ENSG00000160194_NDUFV3	Umbilical Cord	Female	up_sites	0.04438	UTR3	Alu-SINE
21-42911187	ENSG00000160194_NDUFV3	Chorionic Plate	Female	down_sites	0.0210313	UTR3	Alu-SINE
21-42911187	ENSG00000160194_NDUFV3	Villus of Fetal	Female	down_sites	0.0401889	UTR3	Alu-SINE
2-206122202	ENSG00000023228_NDUFS1	Villus of Intermediate	Female	down_sites	0.0388917	ncRNA_exonic	Alu-SINE
2-206122221	ENSG00000023228_NDUFS1	Chorionic Plate	Female	down_sites	0.0463474	ncRNA_exonic	Alu-SINE
19-3194193	ENSG00000125912_NCLN	Villus of Fetal	Female	up_sites	0.0275197	intronic	Alu-SINE
19-3194263	ENSG00000125912_NCLN	Villus of Maternal	Female	up_sites	0.00743566	intronic	Alu-SINE
1-45610857	ENSG00000132780_NASP	Chorionic Plate	Female	down_sites	0.0326637	intronic	Alu-SINE
4-75917586	ENSG00000138744_NAAA	Amnion	Female	up_sites	0.0433758	UTR3	Alu-SINE
13-32515811	ENSG00000244754_N4BP2L2	Villus of Fetal	Female	down_sites	0.0221475	UTR3	Alu-SINE
13-32524825	ENSG00000244754_N4BP2L2	Chorion	Female	up_sites	0.00219285	intronic	Alu-SINE
13-32525553	ENSG00000244754_N4BP2L2	Chorion	Female	up_sites	0.0159636	intronic	Alu-SINE
20-36545782	ENSG00000101335_MYL9	Villus of Intermediate	Female	up_sites	0.0348389	ncRNA_intronic	Alu-SINE
20-36546639	ENSG00000101335_MYL9	Villus of Intermediate	Female	down_sites	0.0234203	ncRNA_intronic	Alu-SINE
20-36546739	ENSG00000101335_MYL9	Chorion	Female	up_sites	0.0134553	ncRNA_intronic	Alu-SINE
20-36547360	ENSG00000101335_MYL9	Chorion	Female	up_sites	0.0372755	ncRNA_intronic	MIR-SINE
19-4654585	ENSG00000074842_MYDGF	Chorion	Female	up_sites	0.049943	UTR3	Alu-SINE
8-97729059	ENSG00000147649_MTDH	Chorion	Female	up_sites	0.0328567	UTR3	Alu-SINE
8-97729188	ENSG00000147649_MTDH	Chorion	Female	up_sites	0.00387594	UTR3	Alu-SINE
2-233866185	ENSG00000224287_MSL3P1	Villus of Maternal	Female	up_sites	0.0261032	ncRNA_exonic	-
2-233866419	ENSG00000224287_MSL3P1	Villus of Intermediate	Female	up_sites	0.0270867	ncRNA_exonic	-
2-233866463	ENSG00000224287_MSL3P1	Villus of Fetal	Female	up_sites	0.0165807	ncRNA_exonic	-
2-233867117	ENSG00000224287_MSL3P1	Villus of Intermediate	Female	up_sites	0.0239909	ncRNA_exonic	-
2-233867180	ENSG00000224287_MSL3P1	Chorionic Plate	Female	up_sites	0.00871423	ncRNA_exonic	-
2-99196002	ENSG00000185414_MRPL30	Villus of Intermediate	Female	up_sites	0.00479668	UTR3	Alu-SINE
19-13773154	ENSG00000037757_MRI1	Villus of Maternal	Female	Han_sites	-	ncRNA_intronic	Alu-SINE
1-9149376	ENSG00000228526_MIR34AHG	Villus of Intermediate	Female	Han_sites	-	ncRNA_exonic	Alu-SINE
16-14327046	ENSG00000262454_MIR193BHG	Umbilical Cord	Female	up_sites	0.0164839	ncRNA_exonic	Alu-SINE
16-14327589	ENSG00000262454_MIR193BHG	Umbilical Cord	Female	down_sites	0.0115318	ncRNA_exonic	Alu-SINE
16-14327822	ENSG00000262454_MIR193BHG	Amnion	Female	up_sites	0.015536	ncRNA_exonic	Alu-SINE
16-14329361	ENSG00000262454_MIR193BHG	Chorion	Female	up_sites	0.0408827	ncRNA_exonic	Alu-SINE
6-111270468	ENSG00000173214_MFSD4B	Chorionic Plate	Female	down_sites	0.00302142	UTR3	Alu-SINE
6-111271676	ENSG00000173214_MFSD4B	Villus of Intermediate	Female	up_sites	0.00243142	UTR3	Alu-SINE
6-111271682	ENSG00000173214_MFSD4B	Chorionic Plate	Female	down_sites	0.0057	UTR3	Alu-SINE
1-39959772	ENSG00000168389_MFSD2A	Chorionic Plate	Female	Tibetan_sites	-	intronic	MIR-SINE
19-3539995	ENSG00000161091_MFSD12	Umbilical Cord	Female	up_sites	0.0191064	intronic	Alu-SINE
19-3540318	ENSG00000161091_MFSD12	Umbilical Cord	Female	up_sites	0.0103738	intronic	Alu-SINE
16-21639981	ENSG00000197006_METTL9	Umbilical Cord	Female	Han_sites	-	UTR3	Alu-SINE
16-21640001	ENSG00000197006_METTL9	Umbilical Cord	Female	Han_sites	-	UTR3	Alu-SINE
16-21640015	ENSG00000197006_METTL9	Villus of Intermediate	Female	Han_sites	-	UTR3	Alu-SINE
16-21640211	ENSG00000197006_METTL9	Villus of Maternal	Female	up_sites	0.0373986	UTR3	Alu-SINE
16-21640219	ENSG00000197006_METTL9	Chorionic Plate	Female	down_sites	0.0191064	UTR3	Alu-SINE
16-21640506	ENSG00000197006_METTL9	Chorionic Plate	Female	down_sites	0.016621	UTR3	Alu-SINE
16-21640710	ENSG00000197006_METTL9	Chorionic Plate	Female	Han_sites	-	UTR3	Alu-SINE
15-80975934	ENSG00000117899_MESD	Villus of Intermediate	Female	up_sites	0.0375808	UTR3	Alu-SINE
22-20572663	ENSG00000099917_MED15	Villus of Fetal	Female	down_sites	0.000961632	intronic	Alu-SINE
6-13788158	ENSG00000050393_MCUR1	Chorion	Female	up_sites	0.0138628	UTR3	Alu-SINE
20-31548031	ENSG00000101898_MCTS2	Umbilical Cord	Female	up_sites	0.00373359	synonymous	-
20-31548031	ENSG00000101898_MCTS2	Villus of Fetal	Female	up_sites	0.0342262	synonymous	-
8-47977549	ENSG00000104738_MCM4	Chorion	Female	up_sites	0.0348985	UTR3	Alu-SINE
8-47977687	ENSG00000104738_MCM4	Chorion	Female	up_sites	0.0239762	UTR3	Alu-SINE
21-46269211	ENSG00000160294_MCM3AP	Amnion	Female	Tibetan_sites	-	intronic	Alu-SINE
16-89917241	ENSG00000258839_MC1R	Villus of Maternal	Female	up_sites	0.0135195	ncRNA_intronic	Alu-SINE
20-3867511	ENSG00000088888_MAVS	Umbilical Cord	Female	down_sites	0.00214001	UTR3	Alu-SINE
20-3867511	ENSG00000088888_MAVS	Villus of Intermediate	Female	up_sites	0.00337819	UTR3	Alu-SINE
20-3868363	ENSG00000088888_MAVS	Amnion	Female	up_sites	0.0233077	UTR3	Alu-SINE
20-3868363	ENSG00000088888_MAVS	Umbilical Cord	Female	up_sites	0.0174799	UTR3	Alu-SINE
20-3868479	ENSG00000088888_MAVS	Villus of Maternal	Female	Han_sites	-	UTR3	Alu-SINE
20-3869447	ENSG00000088888_MAVS	Villus of Intermediate	Female	up_sites	0.0163558	UTR3	Alu-SINE
6-36141554	ENSG00000156711_MAPK13	Villus of Fetal	Female	down_sites	0.00998276	UTR3	Alu-SINE
1-9927412	ENSG00000162441_LZIC	Chorion	Female	up_sites	0.0203415	UTR3	Alu-SINE
1-9927786	ENSG00000162441_LZIC	Umbilical Cord	Female	up_sites	0.0345651	UTR3	Alu-SINE
1-9928634	ENSG00000162441_LZIC	Chorion	Female	up_sites	0.0296509	UTR3	Alu-SINE
5-131201694	ENSG00000186687_LYRM7	Chorion	Female	up_sites	0.0166546	UTR3	Alu-SINE
5-131202443	ENSG00000186687_LYRM7	Amnion	Female	up_sites	0.0202091	UTR3	Alu-SINE
6-31672643	ENSG00000240053_LY6G5B	Chorionic Plate	Female	up_sites	0.0179625	UTR3	Alu-SINE
6-31672682	ENSG00000240053_LY6G5B	Chorion	Female	up_sites	0.0126512	UTR3	Alu-SINE
6-31672682	ENSG00000240053_LY6G5B	Villus of Maternal	Female	up_sites	0.0218069	UTR3	Alu-SINE
6-31673159	ENSG00000240053_LY6G5B	Chorion	Female	up_sites	0.00186029	UTR3	Alu-SINE
19-2327421	ENSG00000130332_LSM7	Chorion	Female	Han_sites	-	intronic	Alu-SINE
5-157756980	ENSG00000155858_LSM11	Umbilical Cord	Female	up_sites	0.0428881	UTR3	Alu-SINE
17-32041100	ENSG00000185158_LRRC37B	Chorion	Female	down_sites	0.0159973	ncRNA_exonic	-
16-67374894	ENSG00000159708_LRRC36	Villus of Fetal	Female	up_sites	0.0192211	intronic	Alu-SINE
6-149821202	ENSG00000120256_LRP11	Villus of Fetal	Female	up_sites	0.00366987	ncRNA_intronic	Alu-SINE
6-149822258	ENSG00000120256_LRP11	Chorionic Plate	Female	up_sites	0.00450423	ncRNA_intronic	Alu-SINE
6-149824694	ENSG00000120256_LRP11	Amnion	Female	up_sites	0.00424001	ncRNA_intronic	Alu-SINE
6-149825758	ENSG00000120256_LRP11	Chorionic Plate	Female	up_sites	0.0167116	ncRNA_intronic	Alu-SINE
3-197885386	ENSG00000186001_LRCH3	Chorion	Female	up_sites	0.0198929	UTR3	Alu-SINE
16-48353290	ENSG00000102910_LONP2	Chorionic Plate	Female	down_sites	0.0349058	UTR3	Alu-SINE
16-48354483	ENSG00000102910_LONP2	Chorionic Plate	Female	down_sites	0.00464779	UTR3	Alu-SINE
19-5710169	ENSG00000196365_LONP1	Villus of Fetal	Female	down_sites	0.0330666	intronic	Alu-SINE
X-150114626	ENSG00000183171_LOC643015	Villus of Intermediate	Female	Tibetan_sites	-	ncRNA_exonic	-
X-150114635	ENSG00000183171_LOC643015	Villus of Intermediate	Female	Tibetan_sites	-	ncRNA_exonic	-
X-150114646	ENSG00000183171_LOC643015	Villus of Intermediate	Female	Tibetan_sites	-	ncRNA_exonic	-
X-150114851	ENSG00000183171_LOC643015	Villus of Fetal	Female	Tibetan_sites	-	ncRNA_exonic	-
X-150114851	ENSG00000183171_LOC643015	Villus of Maternal	Female	Tibetan_sites	-	ncRNA_exonic	-
15-51913957	ENSG00000138594_LOC112268148	Villus of Intermediate	Female	down_sites	0.0441357	UTR3	Alu-SINE
15-51914973	ENSG00000138594_LOC112268148	Umbilical Cord	Female	Han_sites	-	UTR3	Alu-SINE
12-7439728	ENSG00000255836_LOC100419928	Villus of Maternal	Female	down_sites	0.0335964	ncRNA_exonic	-
12-7439788	ENSG00000255836_LOC100419928	Chorionic Plate	Female	down_sites	0.0298776	ncRNA_exonic	-
12-7439788	ENSG00000255836_LOC100419928	Villus of Maternal	Female	down_sites	0.0225174	ncRNA_exonic	-
7-130945478	ENSG00000231721_LINC-PINT	Villus of Maternal	Female	up_sites	0.0185787	ncRNA_exonic	-
2-108596580	ENSG00000169756_LIMS1	Villus of Fetal	Female	up_sites	0.0407827	intronic	Alu-SINE
3-45680795	ENSG00000144791_LIMD1	Umbilical Cord	Female	down_sites	0.0423746	ncRNA_intronic	Alu-SINE
3-45680938	ENSG00000144791_LIMD1	Umbilical Cord	Female	up_sites	0.0238955	ncRNA_intronic	Alu-SINE
12-50201652	ENSG00000050405_LIMA1	Umbilical Cord	Female	up_sites	0.00975785	UTR5	Alu-SINE
1-88982873	ENSG00000137944_KYAT3	Amnion	Female	down_sites	0.0310188	synonymous	-
19-18561466	ENSG00000105700_KXD1	Chorion	Female	Han_sites	-	ncRNA_exonic	Alu-SINE
14-103682551	ENSG00000126214_KLC1	Chorionic Plate	Female	up_sites	0.0343785	ncRNA_exonic	Alu-SINE
14-103682554	ENSG00000126214_KLC1	Villus of Fetal	Female	Han_sites	-	ncRNA_exonic	Alu-SINE
16-57781133	ENSG00000140859_KIFC3	Villus of Maternal	Female	down_sites	0.0055878	intronic	Alu-SINE
17-5027229	ENSG00000129250_KIF1C	Amnion	Female	up_sites	0.0289877	UTR3	Alu-SINE
3-44749367	ENSG00000163807_KIAA1143	Chorionic Plate	Female	down_sites	0.002245	UTR3	Alu-SINE
11-74455795	ENSG00000175538_KCNE3	Villus of Fetal	Female	Han_sites	-	ncRNA_intronic	Alu-SINE
11-74455801	ENSG00000175538_KCNE3	Villus of Maternal	Female	up_sites	0.00604373	ncRNA_intronic	Alu-SINE
16-31123342	ENSG00000103510_KAT8	Chorion	Female	up_sites	0.0366708	ncRNA_intronic	Alu-SINE
16-31123343	ENSG00000103510_KAT8	Chorion	Female	up_sites	0.0357001	ncRNA_intronic	Alu-SINE
16-31123383	ENSG00000103510_KAT8	Chorionic Plate	Female	down_sites	0.0214386	ncRNA_intronic	Alu-SINE
16-31123786	ENSG00000103510_KAT8	Amnion	Female	up_sites	0.00671428	ncRNA_exonic	Alu-SINE
X-74008881	ENSG00000225470_JPX	Umbilical Cord	Female	Han_sites	-	ncRNA_exonic	Alu-SINE
17-75745299	ENSG00000132470_ITGB4	Amnion	Female	down_sites	0.0382771	intronic	Alu-SINE
12-43787936	ENSG00000198001_IRAK4	Chorion	Female	up_sites	0.00122262	UTR3	Alu-SINE
1-45697343	ENSG00000197429_IPP	Villus of Fetal	Female	up_sites	0.00168531	intronic	Alu-SINE
1-45698229	ENSG00000197429_IPP	Chorion	Female	up_sites	0.0156461	intronic	Alu-SINE
1-45698811	ENSG00000197429_IPP	Chorion	Female	up_sites	0.0239485	UTR3	Alu-SINE
1-1316461	ENSG00000127054_INTS11	Chorion	Female	up_sites	0.0122447	intronic	Alu-SINE
1-1316464	ENSG00000127054_INTS11	Chorion	Female	up_sites	0.0208163	intronic	Alu-SINE
1-1316467	ENSG00000127054_INTS11	Chorion	Female	up_sites	0.0268046	intronic	Alu-SINE
1-1317933	ENSG00000127054_INTS11	Chorion	Female	up_sites	0.0143875	ncRNA_intronic	Alu-SINE
1-1317934	ENSG00000127054_INTS11	Chorion	Female	up_sites	0.019835	ncRNA_intronic	Alu-SINE
1-1317981	ENSG00000127054_INTS11	Umbilical Cord	Female	up_sites	0.00631796	ncRNA_intronic	Alu-SINE
1-1317996	ENSG00000127054_INTS11	Chorion	Female	up_sites	0.0437156	ncRNA_intronic	Alu-SINE
1-1318006	ENSG00000127054_INTS11	Chorion	Female	up_sites	0.0322093	ncRNA_intronic	Alu-SINE
1-1318636	ENSG00000127054_INTS11	Chorion	Female	up_sites	0.00315792	ncRNA_exonic	Alu-SINE
16-21639981	ENSG00000140749_IGSF6	Umbilical Cord	Female	Han_sites	-	UTR3	Alu-SINE
16-21640001	ENSG00000140749_IGSF6	Umbilical Cord	Female	Han_sites	-	UTR3	Alu-SINE
16-21640015	ENSG00000140749_IGSF6	Villus of Intermediate	Female	Han_sites	-	UTR3	Alu-SINE
16-21640211	ENSG00000140749_IGSF6	Villus of Maternal	Female	up_sites	0.0373986	UTR3	Alu-SINE
16-21640219	ENSG00000140749_IGSF6	Chorionic Plate	Female	down_sites	0.0191064	UTR3	Alu-SINE
16-21640506	ENSG00000140749_IGSF6	Chorionic Plate	Female	down_sites	0.016621	UTR3	Alu-SINE
16-21640710	ENSG00000140749_IGSF6	Chorionic Plate	Female	Han_sites	-	UTR3	Alu-SINE
21-33433106	ENSG00000159128_IFNGR2	Umbilical Cord	Female	up_sites	0.0324285	intronic	Alu-SINE
8-39969754	ENSG00000188676_IDO2	Villus of Maternal	Female	Tibetan_sites	-	ncRNA_intronic	Alu-SINE
8-39977574	ENSG00000188676_IDO2	Villus of Intermediate	Female	down_sites	0.0359233	ncRNA_intronic	Alu-SINE
1-6223246	ENSG00000116237_ICMT	Amnion	Female	up_sites	0.00900126	UTR3	Alu-SINE
1-6223246	ENSG00000116237_ICMT	Chorion	Female	up_sites	0.00258774	UTR3	Alu-SINE
1-6223246	ENSG00000116237_ICMT	Villus of Intermediate	Female	up_sites	0.0228825	UTR3	Alu-SINE
1-53922223	ENSG00000081870_HSPB11	Villus of Maternal	Female	down_sites	0.00908243	intronic	Alu-SINE
8-43020593	ENSG00000168172_HOOK3	Chorion	Female	up_sites	0.0247145	UTR3	Alu-SINE
8-43020843	ENSG00000168172_HOOK3	Villus of Fetal	Female	down_sites	0.0411738	UTR3	Alu-SINE
20-31548031	ENSG00000101294_HM13	Umbilical Cord	Female	up_sites	0.00373359	synonymous	-
20-31548031	ENSG00000101294_HM13	Villus of Fetal	Female	up_sites	0.0342262	synonymous	-
6-30491658	ENSG00000204592_HLA-E	Villus of Maternal	Female	up_sites	0.0364159	intronic	-
6-33005645	ENSG00000204252_HLA-DOA	Chorion	Female	up_sites	0.0079773	UTR3	Alu-SINE
5-131201694	ENSG00000169567_HINT1	Chorion	Female	up_sites	0.0166546	UTR3	Alu-SINE
5-131202443	ENSG00000169567_HINT1	Amnion	Female	up_sites	0.0202091	UTR3	Alu-SINE
19-46313176	ENSG00000124440_HIF3A	Villus of Fetal	Female	down_sites	0.00896405	intronic	Alu-SINE
6-26095234	ENSG00000010704_HFE	Amnion	Female	up_sites	0.0132189	UTR3	Alu-SINE
6-26095240	ENSG00000010704_HFE	Chorion	Female	up_sites	0.022077	UTR3	Alu-SINE
6-26095317	ENSG00000010704_HFE	Chorion	Female	up_sites	0.0108926	UTR3	Alu-SINE
6-26095323	ENSG00000010704_HFE	Amnion	Female	up_sites	0.0369546	UTR3	Alu-SINE
6-26095406	ENSG00000010704_HFE	Chorion	Female	up_sites	0.00642258	UTR3	Alu-SINE
6-26096395	ENSG00000010704_HFE	Chorion	Female	up_sites	0.00868899	UTR3	Alu-SINE
16-50105226	ENSG00000155393_HEATR3	Villus of Fetal	Female	down_sites	0.00981915	ncRNA_intronic	Alu-SINE
16-50105631	ENSG00000155393_HEATR3	Umbilical Cord	Female	up_sites	0.0363101	ncRNA_intronic	Alu-SINE
15-42569419	ENSG00000137814_HAUS2	Chorion	Female	up_sites	0.00097253	ncRNA_exonic	Alu-SINE
16-9110931	ENSG00000182831_HAPSTR1	Chorion	Female	up_sites	0.0344177	ncRNA_exonic	Alu-SINE
6-26095234	ENSG00000180596_H2BC4	Amnion	Female	up_sites	0.0132189	UTR3	Alu-SINE
6-26095240	ENSG00000180596_H2BC4	Chorion	Female	up_sites	0.022077	UTR3	Alu-SINE
6-26095317	ENSG00000180596_H2BC4	Chorion	Female	up_sites	0.0108926	UTR3	Alu-SINE
6-26095323	ENSG00000180596_H2BC4	Amnion	Female	up_sites	0.0369546	UTR3	Alu-SINE
6-26095406	ENSG00000180596_H2BC4	Chorion	Female	up_sites	0.00642258	UTR3	Alu-SINE
6-26096395	ENSG00000180596_H2BC4	Chorion	Female	up_sites	0.00868899	UTR3	Alu-SINE
7-44832820	ENSG00000105968_H2AZ2	Villus of Intermediate	Female	down_sites	0.017481	UTR3	Alu-SINE
7-44832881	ENSG00000105968_H2AZ2	Chorion	Female	up_sites	0.014455	UTR3	Alu-SINE
7-44833329	ENSG00000105968_H2AZ2	Chorionic Plate	Female	down_sites	0.0320171	UTR3	Alu-SINE
4-155733600	ENSG00000164116_GUCY1A1	Umbilical Cord	Female	Han_sites	-	UTR3	-
8-30678561	ENSG00000104687_GSR	Chorion	Female	up_sites	0.00450474	UTR3	Alu-SINE
8-30679027	ENSG00000104687_GSR	Chorion	Female	up_sites	0.00419119	UTR3	Alu-SINE
8-30679089	ENSG00000104687_GSR	Chorion	Female	up_sites	0.00895699	UTR3	Alu-SINE
16-85672958	ENSG00000131149_GSE1	Villus of Intermediate	Female	Han_sites	-	UTR3	-
17-39918833	ENSG00000073605_GSDMB	Umbilical Cord	Female	Han_sites	-	upstream	Alu-SINE
4-8577364	ENSG00000155269_GPR78	Chorion	Female	up_sites	0.00117539	upstream	-
1-9102364	ENSG00000180758_GPR157	Chorionic Plate	Female	down_sites	0.00590846	UTR3	Alu-SINE
12-110461136	ENSG00000111231_GPN3	Villus of Maternal	Female	Han_sites	-	ncRNA_exonic	-
1-26877933	ENSG00000142751_GPN2	Umbilical Cord	Female	Han_sites	-	ncRNA_intronic	Alu-SINE
12-132770186	ENSG00000090615_GOLGA3	Umbilical Cord	Female	Han_sites	-	UTR3	Alu-SINE
1-145921980	ENSG00000211451_GNRHR2	Amnion	Female	up_sites	0.0364159	ncRNA_intronic	Alu-SINE
1-145923014	ENSG00000211451_GNRHR2	Chorion	Female	up_sites	0.00372284	ncRNA_intronic	Alu-SINE
16-1359868	ENSG00000090581_GNPTG	Villus of Intermediate	Female	Tibetan_sites	-	ncRNA_intronic	Alu-SINE
14-52776141	ENSG00000100522_GNPNAT1	Chorion	Female	up_sites	0.0261751	ncRNA_intronic	Alu-SINE
14-52776694	ENSG00000100522_GNPNAT1	Chorion	Female	up_sites	0.00609743	ncRNA_intronic	Alu-SINE
X-54560917	ENSG00000130119_GNL3L	Villus of Intermediate	Female	up_sites	0.00966749	UTR3	Alu-SINE
X-54560919	ENSG00000130119_GNL3L	Villus of Intermediate	Female	up_sites	0.014576	UTR3	Alu-SINE
X-54562226	ENSG00000130119_GNL3L	Chorionic Plate	Female	up_sites	0.0423812	UTR3	Alu-SINE
X-54562226	ENSG00000130119_GNL3L	Umbilical Cord	Female	up_sites	0.0228245	UTR3	Alu-SINE
X-54562243	ENSG00000130119_GNL3L	Umbilical Cord	Female	up_sites	0.018784	UTR3	Alu-SINE
X-54562308	ENSG00000130119_GNL3L	Villus of Fetal	Female	up_sites	0.0148062	UTR3	Alu-SINE
X-54563515	ENSG00000130119_GNL3L	Villus of Fetal	Female	up_sites	0.0170039	UTR3	Alu-SINE
X-54564508	ENSG00000130119_GNL3L	Chorion	Female	up_sites	0.0266032	UTR3	Alu-SINE
1-68162563	ENSG00000232284_GNG12-AS1	Umbilical Cord	Female	Han_sites	-	ncRNA_exonic	-
9-36215081	ENSG00000159921_GNE	Chorion	Female	Han_sites	-	UTR3	Alu-SINE
9-36215243	ENSG00000159921_GNE	Chorion	Female	up_sites	0.0180773	UTR3	Alu-SINE
3-179397847	ENSG00000114450_GNB4	Chorion	Female	up_sites	0.0269764	ncRNA_exonic	Alu-SINE
3-179398001	ENSG00000114450_GNB4	Chorionic Plate	Female	down_sites	0.00358529	ncRNA_intronic	Alu-SINE
3-155943110	ENSG00000163655_GMPS	Chorion	Female	up_sites	0.0132597	UTR3	Alu-SINE
5-151268442	ENSG00000196743_GM2A	Amnion	Female	Tibetan_sites	-	UTR3	Alu-SINE
12-109851603	ENSG00000139433_GLTP	Amnion	Female	Han_sites	-	UTR3	Alu-SINE
5-95792538	ENSG00000173221_GLRX	Chorionic Plate	Female	down_sites	0.00113378	intronic	Alu-SINE
17-44799370	ENSG00000182963_GJC1	Chorionic Plate	Female	down_sites	0.0172712	UTR3	Alu-SINE
17-44799780	ENSG00000182963_GJC1	Chorionic Plate	Female	up_sites	0.0216754	UTR3	Alu-SINE
17-44799875	ENSG00000182963_GJC1	Villus of Fetal	Female	Han_sites	-	UTR3	Alu-SINE
17-44800253	ENSG00000182963_GJC1	Villus of Fetal	Female	up_sites	0.0275034	UTR3	Alu-SINE
17-44801676	ENSG00000182963_GJC1	Umbilical Cord	Female	Han_sites	-	UTR3	Alu-SINE
17-44801680	ENSG00000182963_GJC1	Umbilical Cord	Female	Han_sites	-	UTR3	Alu-SINE
22-24574708	ENSG00000286070_GGT1	Villus of Fetal	Female	Han_sites	-	UTR3	Alu-SINE
22-24574716	ENSG00000286070_GGT1	Umbilical Cord	Female	Han_sites	-	UTR3	Alu-SINE
2-85546588	ENSG00000115486_GGCX	Umbilical Cord	Female	up_sites	0.0245196	UTR3	Alu-SINE
7-880140	ENSG00000239857_GET4	Villus of Fetal	Female	up_sites	0.0370864	ncRNA_exonic	Alu-SINE
7-880218	ENSG00000239857_GET4	Amnion	Female	down_sites	0.0231486	ncRNA_exonic	Alu-SINE
7-880218	ENSG00000239857_GET4	Villus of Maternal	Female	up_sites	0.00368774	ncRNA_exonic	Alu-SINE
7-880964	ENSG00000239857_GET4	Villus of Maternal	Female	up_sites	0.0231105	ncRNA_exonic	Alu-SINE
1-89183877	ENSG00000162654_GBP4	Villus of Maternal	Female	up_sites	0.0100803	UTR3	Alu-SINE
11-778290	ENSG00000255284_GATD1-DT	Villus of Intermediate	Female	down_sites	0.0292382	ncRNA_exonic	Alu-SINE
11-768722	ENSG00000177225_GATD1	Umbilical Cord	Female	Han_sites	-	UTR3	Alu-SINE
11-769001	ENSG00000177225_GATD1	Chorion	Female	up_sites	0.0117533	UTR3	Alu-SINE
11-769054	ENSG00000177225_GATD1	Villus of Intermediate	Female	down_sites	0.0106705	UTR3	Alu-SINE
11-769766	ENSG00000177225_GATD1	Umbilical Cord	Female	Han_sites	-	UTR3	Alu-SINE
1-151124279	ENSG00000143458_GABPB2	Umbilical Cord	Female	up_sites	0.00381733	UTR3	Alu-SINE
10-73776780	ENSG00000196968_FUT11	Amnion	Female	up_sites	0.0419699	downstream	Alu-SINE
10-73777672	ENSG00000196968_FUT11	Umbilical Cord	Female	Han_sites	-	intergenic	Alu-SINE
10-73778325	ENSG00000196968_FUT11	Chorion	Female	Tibetan_sites	-	intergenic	Alu-SINE
10-73779545	ENSG00000196968_FUT11	Amnion	Female	Tibetan_sites	-	intergenic	Alu-SINE
X-74008881	ENSG00000230590_FTX	Umbilical Cord	Female	Han_sites	-	ncRNA_exonic	Alu-SINE
X-74216921	ENSG00000230590_FTX	Villus of Intermediate	Female	up_sites	0.0275197	ncRNA_intronic	Alu-SINE
X-74276500	ENSG00000230590_FTX	Villus of Fetal	Female	down_sites	0.0199737	ncRNA_intronic	Alu-SINE
X-74276500	ENSG00000230590_FTX	Villus of Intermediate	Female	up_sites	0.018211	ncRNA_intronic	Alu-SINE
19-682421	ENSG00000070404_FSTL3	Umbilical Cord	Female	Tibetan_sites	-	UTR3	-
2-152390071	ENSG00000157827_FMNL2	Villus of Maternal	Female	Han_sites	-	ncRNA_exonic	-
17-45218075	ENSG00000267121_FMNL1-DT	Villus of Fetal	Female	Han_sites	-	ncRNA_intronic	Alu-SINE
13-28368732	ENSG00000102755_FLT1	Chorionic Plate	Female	down_sites	0.0160657	intronic	Alu-SINE
13-28368802	ENSG00000102755_FLT1	Chorionic Plate	Female	down_sites	0.0167879	intronic	Alu-SINE
13-28369353	ENSG00000102755_FLT1	Villus of Intermediate	Female	up_sites	0.0428627	intronic	Alu-SINE
13-28369362	ENSG00000102755_FLT1	Villus of Fetal	Female	up_sites	0.0481265	intronic	Alu-SINE
3-58141198	ENSG00000136068_FLNB	Chorion	Female	up_sites	0.0224431	intronic	Alu-SINE
3-58141198	ENSG00000136068_FLNB	Umbilical Cord	Female	Han_sites	-	intronic	Alu-SINE
17-17224711	ENSG00000154803_FLCN	Chorion	Female	up_sites	0.0260474	intronic	Alu-SINE
X-131795803	ENSG00000213468_FIRRE	Chorionic Plate	Female	up_sites	0.0248456	ncRNA_exonic	-
X-131795880	ENSG00000213468_FIRRE	Villus of Fetal	Female	up_sites	0.0347543	ncRNA_exonic	-
4-152977158	ENSG00000137460_FHDC1	Chorion	Female	Han_sites	-	UTR3	Alu-SINE
4-152977560	ENSG00000137460_FHDC1	Chorionic Plate	Female	Tibetan_sites	-	UTR3	Alu-SINE
14-74736301	ENSG00000119616_FCF1	Amnion	Female	up_sites	0.0487801	UTR3	Alu-SINE
12-117029847	ENSG00000174989_FBXW8	Amnion	Female	up_sites	0.0124187	UTR3	Alu-SINE
22-23263508	ENSG00000230701_FBXW4P1	Villus of Fetal	Female	up_sites	0.014959	ncRNA_exonic	-
21-31627205	ENSG00000230870_FBXW11P1	Chorion	Female	Han_sites	-	ncRNA_exonic	-
16-30921378	ENSG00000260852_FBXL19-AS1	Villus of Fetal	Female	up_sites	0.0100041	ncRNA_exonic	Alu-SINE
7-5476999	ENSG00000155034_FBXL18	Villus of Fetal	Female	Han_sites	-	ncRNA_exonic	Alu-SINE
1-231021928	ENSG00000182118_FAM89A	Villus of Maternal	Female	up_sites	0.0302678	ncRNA_exonic	-
1-179073416	ENSG00000116199_FAM20B	Chorion	Female	up_sites	0.00479236	UTR3	Alu-SINE
1-179073445	ENSG00000116199_FAM20B	Chorion	Female	up_sites	0.0194862	UTR3	Alu-SINE
7-135733606	ENSG00000189320_FAM180A	Chorion	Female	Tibetan_sites	-	UTR3	Alu-SINE
6-130875816	ENSG00000079819_EPB41L2	Chorionic Plate	Female	Han_sites	-	intronic	Alu-SINE
X-150114626	ENSG00000235703_EOLA2-DT	Villus of Intermediate	Female	Tibetan_sites	-	ncRNA_exonic	-
X-150114635	ENSG00000235703_EOLA2-DT	Villus of Intermediate	Female	Tibetan_sites	-	ncRNA_exonic	-
X-150114646	ENSG00000235703_EOLA2-DT	Villus of Intermediate	Female	Tibetan_sites	-	ncRNA_exonic	-
X-150114851	ENSG00000235703_EOLA2-DT	Villus of Fetal	Female	Tibetan_sites	-	ncRNA_exonic	-
X-150114851	ENSG00000235703_EOLA2-DT	Villus of Maternal	Female	Tibetan_sites	-	ncRNA_exonic	-
18-691565	ENSG00000132199_ENOSF1	Umbilical Cord	Female	up_sites	0.0125506	intronic	Alu-SINE
18-692496	ENSG00000132199_ENOSF1	Chorion	Female	up_sites	0.00538067	intronic	Alu-SINE
18-692496	ENSG00000132199_ENOSF1	Villus of Maternal	Female	Han_sites	-	intronic	Alu-SINE
1-236483559	ENSG00000244457_ENO1P1	Villus of Fetal	Female	down_sites	0.00145056	ncRNA_exonic	-
1-236483854	ENSG00000244457_ENO1P1	Villus of Fetal	Female	down_sites	0.0288585	ncRNA_exonic	-
1-236483980	ENSG00000244457_ENO1P1	Chorionic Plate	Female	down_sites	0.0434206	ncRNA_exonic	-
1-236483988	ENSG00000244457_ENO1P1	Chorionic Plate	Female	down_sites	0.0206647	ncRNA_exonic	-
1-236483988	ENSG00000244457_ENO1P1	Villus of Fetal	Female	down_sites	0.0267921	ncRNA_exonic	-
1-236483989	ENSG00000244457_ENO1P1	Villus of Intermediate	Female	down_sites	0.0200616	ncRNA_exonic	-
1-236484040	ENSG00000244457_ENO1P1	Chorionic Plate	Female	down_sites	0.0150492	ncRNA_exonic	-
10-117485631	ENSG00000229847_EMX2OS	Chorion	Female	up_sites	0.0276557	ncRNA_exonic	Alu-SINE
16-10529687	ENSG00000213853_EMP2	Chorion	Female	up_sites	0.0456253	ncRNA_exonic	Alu-SINE
16-10529701	ENSG00000213853_EMP2	Chorion	Female	up_sites	0.00689323	ncRNA_splicing	Alu-SINE
16-10531244	ENSG00000213853_EMP2	Umbilical Cord	Female	Han_sites	-	ncRNA_intronic	Alu-SINE
16-10531390	ENSG00000213853_EMP2	Villus of Maternal	Female	Tibetan_sites	-	ncRNA_intronic	Alu-SINE
16-10531456	ENSG00000213853_EMP2	Chorion	Female	up_sites	0.00185266	ncRNA_intronic	Alu-SINE
16-10531468	ENSG00000213853_EMP2	Chorion	Female	up_sites	0.0126893	ncRNA_intronic	Alu-SINE
16-10531557	ENSG00000213853_EMP2	Villus of Maternal	Female	up_sites	0.0194862	ncRNA_intronic	Alu-SINE
1-19215962	ENSG00000230424_EMC1-AS1	Villus of Fetal	Female	up_sites	0.0236849	ncRNA_intronic	Alu-SINE
1-19215962	ENSG00000230424_EMC1-AS1	Villus of Intermediate	Female	up_sites	0.0212716	ncRNA_intronic	Alu-SINE
1-19216137	ENSG00000230424_EMC1-AS1	Villus of Maternal	Female	up_sites	0.0128246	ncRNA_intronic	Alu-SINE
1-19215962	ENSG00000127463_EMC1	Villus of Fetal	Female	up_sites	0.0236849	ncRNA_intronic	Alu-SINE
1-19215962	ENSG00000127463_EMC1	Villus of Intermediate	Female	up_sites	0.0212716	ncRNA_intronic	Alu-SINE
1-19216137	ENSG00000127463_EMC1	Villus of Maternal	Female	up_sites	0.0128246	ncRNA_intronic	Alu-SINE
11-130032942	ENSG00000255262_ELOBP2	Chorion	Female	Han_sites	-	ncRNA_exonic	-
4-139047379	ENSG00000109381_ELF2	Chorionic Plate	Female	down_sites	0.00980513	intergenic	Alu-SINE
2-37100559	ENSG00000055332_EIF2AK2	Villus of Maternal	Female	up_sites	0.0408887	UTR3	-
2-37100938	ENSG00000055332_EIF2AK2	Umbilical Cord	Female	Han_sites	-	UTR3	-
15-48879140	ENSG00000255302_EID1	Chorion	Female	Han_sites	-	UTR3	-
15-48879140	ENSG00000255302_EID1	Umbilical Cord	Female	Han_sites	-	UTR3	-
17-47424342	ENSG00000178852_EFCAB13	Villus of Maternal	Female	up_sites	0.00670006	intronic	-
1-236483559	ENSG00000186197_EDARADD	Villus of Fetal	Female	down_sites	0.00145056	ncRNA_exonic	-
1-236483854	ENSG00000186197_EDARADD	Villus of Fetal	Female	down_sites	0.0288585	ncRNA_exonic	-
1-236483980	ENSG00000186197_EDARADD	Chorionic Plate	Female	down_sites	0.0434206	ncRNA_exonic	-
1-236483988	ENSG00000186197_EDARADD	Chorionic Plate	Female	down_sites	0.0206647	ncRNA_exonic	-
1-236483988	ENSG00000186197_EDARADD	Villus of Fetal	Female	down_sites	0.0267921	ncRNA_exonic	-
1-236483989	ENSG00000186197_EDARADD	Villus of Intermediate	Female	down_sites	0.0200616	ncRNA_exonic	-
1-236484040	ENSG00000186197_EDARADD	Chorionic Plate	Female	down_sites	0.0150492	ncRNA_exonic	-
3-107251144	ENSG00000243701_DUBR	Umbilical Cord	Female	Han_sites	-	ncRNA_intronic	Alu-SINE
8-94792699	ENSG00000156162_DPY19L4	Villus of Intermediate	Female	up_sites	0.0487801	ncRNA_intronic	Alu-SINE
8-94792699	ENSG00000156162_DPY19L4	Villus of Maternal	Female	up_sites	0.0255331	ncRNA_intronic	Alu-SINE
8-94792709	ENSG00000156162_DPY19L4	Umbilical Cord	Female	up_sites	0.0219009	ncRNA_intronic	Alu-SINE
16-3660826	ENSG00000213918_DNASE1	Villus of Intermediate	Female	up_sites	0.0424187	UTR3	Alu-SINE
11-31431203	ENSG00000170946_DNAJC24	Chorion	Female	up_sites	0.0227467	UTR3	Alu-SINE
5-34952893	ENSG00000168724_DNAJC21	Chorionic Plate	Female	down_sites	0.0491357	intronic	Alu-SINE
5-34952893	ENSG00000168724_DNAJC21	Villus of Maternal	Female	up_sites	0.0113706	intronic	Alu-SINE
5-34953082	ENSG00000168724_DNAJC21	Chorionic Plate	Female	up_sites	0.0308414	intronic	Alu-SINE
9-33038134	ENSG00000086061_DNAJA1	Chorion	Female	Han_sites	-	intronic	Alu-SINE
7-87187352	ENSG00000135164_DMTF1	Villus of Fetal	Female	up_sites	0.0119131	intronic	Alu-SINE
14-50327645	ENSG00000125375_DMAC2L	Villus of Maternal	Female	up_sites	0.0185555	ncRNA_intronic	Alu-SINE
20-36545782	ENSG00000232907_DLGAP4-AS1	Villus of Intermediate	Female	up_sites	0.0348389	ncRNA_intronic	Alu-SINE
20-36546639	ENSG00000232907_DLGAP4-AS1	Villus of Intermediate	Female	down_sites	0.0234203	ncRNA_intronic	Alu-SINE
20-36546739	ENSG00000232907_DLGAP4-AS1	Chorion	Female	up_sites	0.0134553	ncRNA_intronic	Alu-SINE
20-36547360	ENSG00000232907_DLGAP4-AS1	Chorion	Female	up_sites	0.0372755	ncRNA_intronic	MIR-SINE
10-77815467	ENSG00000151208_DLG5	Villus of Intermediate	Female	Han_sites	-	intronic	Alu-SINE
5-80627541	ENSG00000228716_DHFR	Umbilical Cord	Female	up_sites	0.011207	UTR3	Alu-SINE
5-80627542	ENSG00000228716_DHFR	Umbilical Cord	Female	up_sites	0.0289348	UTR3	Alu-SINE
1-10459007	ENSG00000160049_DFFA	Villus of Intermediate	Female	up_sites	0.0333734	ncRNA_intronic	Alu-SINE
1-10461073	ENSG00000160049_DFFA	Umbilical Cord	Female	up_sites	0.00414781	UTR3	Alu-SINE
1-10461105	ENSG00000160049_DFFA	Umbilical Cord	Female	up_sites	0.0241896	UTR3	Alu-SINE
22-41600160	ENSG00000100418_DESI1	Chorion	Female	up_sites	0.0324203	UTR3	Alu-SINE
3-57626544	ENSG00000174839_DENND6A	Villus of Fetal	Female	up_sites	0.0027296	UTR3	Alu-SINE
3-57626544	ENSG00000174839_DENND6A	Villus of Intermediate	Female	up_sites	0.0410083	UTR3	Alu-SINE
11-126346700	ENSG00000110063_DCPS	Umbilical Cord	Female	Han_sites	-	ncRNA_intronic	-
12-91148212	ENSG00000011465_DCN	Chorion	Female	Tibetan_sites	-	intronic	Alu-SINE
4-17801991	ENSG00000163257_DCAF16	Chorion	Female	up_sites	0.0121391	UTR3	Alu-SINE
4-17802058	ENSG00000163257_DCAF16	Chorion	Female	up_sites	0.00300843	UTR3	Alu-SINE
19-3963026	ENSG00000167657_DAPK3	Chorionic Plate	Female	up_sites	0.0275254	intronic	Alu-SINE
7-92092700	ENSG00000001630_CYP51A1	Chorionic Plate	Female	up_sites	0.0304399	UTR3	Alu-SINE
2-203303575	ENSG00000119004_CYP20A1	Villus of Intermediate	Female	Han_sites	-
2-203304771	ENSG00000119004_CYP20A1	Umbilical Cord	Female	up_sites	0.0239123	UTR3	Alu-SINE
2-203305438	ENSG00000119004_CYP20A1	Chorionic Plate	Female	up_sites	0.020609	UTR3	Alu-SINE
10-100233036	ENSG00000095485_CWF19L1	Chorion	Female	up_sites	0.00962571	ncRNA_intronic	Alu-SINE
10-100233141	ENSG00000095485_CWF19L1	Villus of Maternal	Female	up_sites	0.0401889	ncRNA_intronic	Alu-SINE
1-150732007	ENSG00000163131_CTSS	Villus of Maternal	Female	up_sites	0.00532861	UTR3	Alu-SINE
1-150732161	ENSG00000163131_CTSS	Chorion	Female	Han_sites	-	UTR3	Alu-SINE
20-45896127	ENSG00000064601_CTSA	Chorion	Female	Tibetan_sites	-	intronic	Alu-SINE
17-63872049	ENSG00000213218_CSH2	Villus of Intermediate	Female	Han_sites	-	UTR3	-
12-53174631	ENSG00000139631_CSAD	Umbilical Cord	Female	Tibetan_sites	-	intronic	Alu-SINE
12-53177802	ENSG00000139631_CSAD	Umbilical Cord	Female	down_sites	0.00468253	intronic	Alu-SINE
12-53178703	ENSG00000139631_CSAD	Villus of Fetal	Female	up_sites	0.0310188	intronic	Alu-SINE
12-53179056	ENSG00000139631_CSAD	Chorionic Plate	Female	up_sites	0.0316786	intronic	Alu-SINE
21-33591875	ENSG00000205758_CRYZL1	Umbilical Cord	Female	Han_sites	-	intronic	Alu-SINE
21-33593809	ENSG00000205758_CRYZL1	Umbilical Cord	Female	Han_sites	-	intronic	Alu-SINE
11-68756066	ENSG00000110090_CPT1A	Chorion	Female	up_sites	0.0216562	UTR3	Alu-SINE
9-128327658	ENSG00000167113_COQ4	Amnion	Female	down_sites	0.0293985	intronic	Alu-SINE
9-128331105	ENSG00000167113_COQ4	Chorion	Female	up_sites	0.0254499	intronic	Alu-SINE
9-128331690	ENSG00000167113_COQ4	Amnion	Female	up_sites	0.0235278	intronic	Alu-SINE
9-128331690	ENSG00000167113_COQ4	Villus of Intermediate	Female	up_sites	0.0495159	intronic	Alu-SINE
9-128331692	ENSG00000167113_COQ4	Amnion	Female	up_sites	0.0138754	intronic	Alu-SINE
9-36215081	ENSG00000122705_CLTA	Chorion	Female	Han_sites	-	UTR3	Alu-SINE
9-36215243	ENSG00000122705_CLTA	Chorion	Female	up_sites	0.0180773	UTR3	Alu-SINE
11-123071672	ENSG00000166250_CLMP	Villus of Maternal	Female	up_sites	0.0249025	ncRNA_intronic	Alu-SINE
2-200856342	ENSG00000013441_CLK1	Chorion	Female	Tibetan_sites	-	intronic	Alu-SINE
15-92893938	ENSG00000173575_CHD2	Chorion	Female	down_sites	0.0310557	ncRNA_intronic	Alu-SINE
1-3813741	ENSG00000116198_CEP104	Chorion	Female	Han_sites	-	UTR3	Alu-SINE
16-67844874	ENSG00000102901_CENPT	Chorionic Plate	Female	down_sites	0.0119996	intronic	Alu-SINE
19-58584082	ENSG00000213753_CENPBD2P	Amnion	Female	up_sites	0.0120955	ncRNA_exonic	Alu-SINE
11-119004726	ENSG00000186166_CENATAC	Villus of Intermediate	Female	up_sites	0.00384153	ncRNA_exonic	Alu-SINE
11-119004980	ENSG00000186166_CENATAC	Villus of Intermediate	Female	down_sites	0.0150299	intronic	Alu-SINE
11-119007323	ENSG00000186166_CENATAC	Villus of Intermediate	Female	Han_sites	-
11-119009244	ENSG00000186166_CENATAC	Chorion	Female	up_sites	0.0304199	intronic	Alu-SINE
11-119010007	ENSG00000186166_CENATAC	Chorion	Female	up_sites	0.00141203	intronic	Alu-SINE
11-119010009	ENSG00000186166_CENATAC	Villus of Fetal	Female	down_sites	0.00572599	intronic	Alu-SINE
6-4953263	ENSG00000153046_CDYL	Villus of Fetal	Female	down_sites	0.0394814	intronic	Alu-SINE
14-50327645	ENSG00000100490_CDKL1	Villus of Maternal	Female	up_sites	0.0185555	ncRNA_intronic	Alu-SINE
16-89687664	ENSG00000185324_CDK10	Villus of Intermediate	Female	Han_sites	-	non-synonymous	Alu-SINE
16-89688267	ENSG00000185324_CDK10	Villus of Intermediate	Female	Han_sites	-	intronic	Alu-SINE
16-89688334	ENSG00000185324_CDK10	Villus of Intermediate	Female	Han_sites	-
16-89688980	ENSG00000185324_CDK10	Amnion	Female	up_sites	0.015734	intronic	Alu-SINE
16-89689720	ENSG00000185324_CDK10	Chorion	Female	Han_sites	-	intronic	Alu-SINE
1-207769043	ENSG00000117335_CD46	Umbilical Cord	Female	up_sites	0.00976397	ncRNA_intronic	Alu-SINE
1-207769199	ENSG00000117335_CD46	Umbilical Cord	Female	up_sites	0.0219982	ncRNA_intronic	Alu-SINE
1-207769818	ENSG00000117335_CD46	Chorion	Female	up_sites	0.00102386	ncRNA_intronic	Alu-SINE
1-207769837	ENSG00000117335_CD46	Umbilical Cord	Female	up_sites	0.0111065	ncRNA_intronic	Alu-SINE
12-7439728	ENSG00000177675_CD163L1	Villus of Maternal	Female	down_sites	0.0335964	ncRNA_exonic	-
12-7439788	ENSG00000177675_CD163L1	Chorionic Plate	Female	down_sites	0.0298776	ncRNA_exonic	-
12-7439788	ENSG00000177675_CD163L1	Villus of Maternal	Female	down_sites	0.0225174	ncRNA_exonic	-
2-207754926	ENSG00000163249_CCNYL1	Chorion	Female	up_sites	0.0492808	UTR3	Alu-SINE
2-207755025	ENSG00000163249_CCNYL1	Chorionic Plate	Female	down_sites	0.033225	UTR3	Alu-SINE
2-207755025	ENSG00000163249_CCNYL1	Villus of Maternal	Female	up_sites	0.00155456	UTR3	Alu-SINE
8-133224739	ENSG00000104415_CCN4	Umbilical Cord	Female	Han_sites	-	intronic	Alu-SINE
17-43218611	ENSG00000236383_CCDC200	Chorion	Female	Han_sites	-	UTR3	Alu-SINE
17-43219638	ENSG00000236383_CCDC200	Villus of Fetal	Female	Han_sites	-	UTR3	Alu-SINE
5-69280917	ENSG00000183323_CCDC125	Chorion	Female	up_sites	0.0353183	UTR3	Alu-SINE
10-68759232	ENSG00000060339_CCAR1	Villus of Maternal	Female	up_sites	0.00176305	intronic	Alu-SINE
10-68776647	ENSG00000060339_CCAR1	Villus of Maternal	Female	up_sites	0.0326085	intronic	Alu-SINE
21-36139950	ENSG00000236830_CBR3-AS1	Villus of Intermediate	Female	Han_sites	-
21-36139950	ENSG00000159231_CBR3	Villus of Intermediate	Female	Han_sites	-
20-33646754	ENSG00000078699_CBFA2T2	Umbilical Cord	Female	up_sites	0.00264091	UTR3	Alu-SINE
2-201218007	ENSG00000003400_CASP10	Villus of Fetal	Female	up_sites	0.00614	UTR3	Alu-SINE
4-86914805	ENSG00000285458_C4orf36	Chorionic Plate	Female	down_sites	0.0349867	ncRNA_exonic	-
2-74418365	ENSG00000284308_C2orf81	Amnion	Female	Tibetan_sites	-	synonymous	-
2-231047420	ENSG00000204128_C2orf72	Villus of Fetal	Female	Han_sites	-	UTR3	-
11-74132264	ENSG00000168014_C2CD3	Chorionic Plate	Female	up_sites	0.0179411	UTR3	Alu-SINE
22-37946813	ENSG00000128346_C22orf23	Umbilical Cord	Female	up_sites	0.0137217	intronic	Alu-SINE
22-37947883	ENSG00000128346_C22orf23	Umbilical Cord	Female	Tibetan_sites	-	intronic	Alu-SINE
22-37948223	ENSG00000128346_C22orf23	Chorion	Female	up_sites	0.0356619	intronic	Alu-SINE
17-32329129	ENSG00000108666_C17orf75	Umbilical Cord	Female	up_sites	0.033129	ncRNA_intronic	Alu-SINE
15-83005358	ENSG00000169609_C15orf40	Amnion	Female	up_sites	0.0169323	ncRNA_intronic	Alu-SINE
15-83005358	ENSG00000169609_C15orf40	Chorion	Female	up_sites	0.0010455	ncRNA_intronic	Alu-SINE
15-83005409	ENSG00000169609_C15orf40	Chorion	Female	up_sites	0.00474705	ncRNA_intronic	Alu-SINE
11-16756344	ENSG00000110696_C11orf58	Villus of Intermediate	Female	up_sites	0.0401636	UTR3	Alu-SINE
1-44814763	ENSG00000222009_BTBD19	Umbilical Cord	Female	Han_sites	-	UTR3	Alu-SINE
1-220058629	ENSG00000162813_BPNT1	Chorion	Female	up_sites	0.0190988	UTR3	Alu-SINE
10-86926319	ENSG00000107779_BMPR1A	Umbilical Cord	Female	up_sites	0.0090848	UTR3	Alu-SINE
22-23263508	ENSG00000186716_BCR	Villus of Fetal	Female	up_sites	0.014959	ncRNA_exonic	-
21-41173660	ENSG00000182240_BACE2	Villus of Intermediate	Female	up_sites	0.0492182	intronic	Alu-SINE
21-41174281	ENSG00000182240_BACE2	Villus of Intermediate	Female	up_sites	0.0293985	intronic	Alu-SINE
21-41174281	ENSG00000182240_BACE2	Villus of Maternal	Female	up_sites	0.0388282	intronic	Alu-SINE
3-57272806	ENSG00000239388_ASB14	Chorion	Female	up_sites	0.0338652	UTR3	Alu-SINE
X-2906875	ENSG00000006756_ARSD	Villus of Maternal	Female	up_sites	0.000476665	UTR3	Alu-SINE
22-50624069	ENSG00000100299_ARSA	Chorion	Female	Han_sites	-	UTR3	-
22-50624069	ENSG00000100299_ARSA	Villus of Intermediate	Female	Han_sites	-	UTR3	-
15-89897328	ENSG00000250021_ARPIN-AP3S2	Villus of Maternal	Female	up_sites	0.0340911	UTR3	Alu-SINE
15-89899357	ENSG00000250021_ARPIN-AP3S2	Chorion	Female	up_sites	0.0425704	UTR3	Alu-SINE
15-89899374	ENSG00000250021_ARPIN-AP3S2	Villus of Maternal	Female	up_sites	0.0192308	UTR3	Alu-SINE
15-89897328	ENSG00000242498_ARPIN	Villus of Maternal	Female	up_sites	0.0340911	UTR3	Alu-SINE
15-89899357	ENSG00000242498_ARPIN	Chorion	Female	up_sites	0.0425704	UTR3	Alu-SINE
15-89899374	ENSG00000242498_ARPIN	Villus of Maternal	Female	up_sites	0.0192308	UTR3	Alu-SINE
3-9818486	ENSG00000250151_ARPC4-TTLL3	Amnion	Female	down_sites	0.00786463	UTR5	Alu-SINE
2-218235983	ENSG00000163466_ARPC2	Villus of Intermediate	Female	down_sites	0.0160657	intronic	Alu-SINE
2-218236698	ENSG00000163466_ARPC2	Chorion	Female	up_sites	0.0275197	intronic	Alu-SINE
17-81681366	ENSG00000214087_ARL16	Amnion	Female	Han_sites	-	UTR3	Alu-SINE
17-64751232	ENSG00000215769_ARHGAP27P1-BPTFP1-KPNA2P3	Chorion	Female	up_sites	0.000411353	ncRNA_exonic	-
5-143226436	ENSG00000145819_ARHGAP26	Chorionic Plate	Female	up_sites	0.0126485	UTR3	Alu-SINE
11-47168588	ENSG00000149182_ARFGAP2	Amnion	Female	up_sites	0.0487579	ncRNA_splicing	Alu-SINE
3-57272806	ENSG00000157500_APPL1	Chorion	Female	up_sites	0.0338652	UTR3	Alu-SINE
X-85090880	ENSG00000155008_APOOL	Villus of Intermediate	Female	up_sites	0.0314811	UTR3	Alu-SINE
22-36266825	ENSG00000100342_APOL1	Amnion	Female	up_sites	0.0132574	UTR3	Alu-SINE
22-39019906	ENSG00000244509_APOBEC3C	Villus of Fetal	Female	up_sites	0.0300865	UTR3	Alu-SINE
13-110898841	ENSG00000088448_ANKRD10	Umbilical Cord	Female	Han_sites	-	ncRNA_intronic	Alu-SINE
13-110898852	ENSG00000088448_ANKRD10	Umbilical Cord	Female	Han_sites	-	ncRNA_intronic	Alu-SINE
13-110898976	ENSG00000088448_ANKRD10	Chorion	Female	up_sites	0.0191877	ncRNA_intronic	Alu-SINE
13-110899024	ENSG00000088448_ANKRD10	Chorion	Female	up_sites	0.0280397	ncRNA_intronic	Alu-SINE
15-64956360	ENSG00000166839_ANKDD1A	Villus of Intermediate	Female	up_sites	0.0015697	intronic	Alu-SINE
12-121331976	ENSG00000089053_ANAPC5	Chorion	Female	up_sites	0.00494676	intronic	Alu-SINE
12-121332249	ENSG00000089053_ANAPC5	Chorionic Plate	Female	up_sites	0.0259432	intronic	Alu-SINE
10-72234025	ENSG00000166295_ANAPC16	Villus of Maternal	Female	up_sites	0.00914587	UTR3	Alu-SINE
10-72234107	ENSG00000166295_ANAPC16	Chorionic Plate	Female	down_sites	0.00865252	UTR3	Alu-SINE
10-72235070	ENSG00000166295_ANAPC16	Villus of Fetal	Female	up_sites	0.035975	UTR3	Alu-SINE
10-72235070	ENSG00000166295_ANAPC16	Villus of Intermediate	Female	up_sites	0.0135662	UTR3	Alu-SINE
10-72235076	ENSG00000166295_ANAPC16	Villus of Fetal	Female	up_sites	0.0477868	UTR3	Alu-SINE
10-72235331	ENSG00000166295_ANAPC16	Chorion	Female	up_sites	0.00464601	UTR3	Alu-SINE
10-72235332	ENSG00000166295_ANAPC16	Chorion	Female	up_sites	0.0307039	UTR3	Alu-SINE
7-2722883	ENSG00000174945_AMZ1	Villus of Maternal	Female	up_sites	0.03464	intergenic	Alu-SINE
18-58538755	ENSG00000198796_ALPK2	Umbilical Cord	Female	Han_sites	-	intronic	ERVL-MaLR-LTR
18-58538789	ENSG00000198796_ALPK2	Umbilical Cord	Female	Han_sites	-	intronic	ERVL-MaLR-LTR
11-43898444	ENSG00000166199_ALKBH3	Chorion	Female	down_sites	0.039789	ncRNA_exonic	-
1-38995966	ENSG00000174574_AKIRIN1	Chorionic Plate	Female	down_sites	0.0395815	intronic	Alu-SINE
7-92092700	ENSG00000127914_AKAP9	Chorionic Plate	Female	up_sites	0.0304399	UTR3	Alu-SINE
7-16864729	ENSG00000173467_AGR3	Amnion	Female	up_sites	0.0351594	ncRNA_exonic	-
16-89984987	ENSG00000223959_AFG3L1P	Villus of Intermediate	Female	up_sites	0.0138367	ncRNA_intronic	Alu-SINE
4-86995126	ENSG00000172493_AFF1	Villus of Intermediate	Female	up_sites	0.0316812	intronic	Alu-SINE
8-66455725	ENSG00000147576_ADHFE1	Villus of Maternal	Female	up_sites	0.0390835	intronic	Alu-SINE
5-157478559	ENSG00000135074_ADAM19	Villus of Intermediate	Female	Han_sites	-	UTR3	ERV1-LTR
20-45848148	ENSG00000101473_ACOT8	Umbilical Cord	Female	up_sites	0.00912063	intronic	Alu-SINE
11-77023963	ENSG00000078124_ACER3	Chorion	Female	up_sites	0.00889057	UTR3	Alu-SINE
17-45142695	ENSG00000181513_ACBD4	Villus of Fetal	Female	Han_sites	-	UTR3	Alu-SINE
2-69463445	ENSG00000115977_AAK1	Villus of Intermediate	Female	Tibetan_sites	-	UTR3	Alu-SINE
17-68135533	ENSG00000291214_-	Umbilical Cord	Female	down_sites	0.0158609	ncRNA_exonic	-
15-84641599	ENSG00000291159_-	Chorion	Female	up_sites	0.0270798	ncRNA_exonic	Alu-SINE
7-66543831	ENSG00000291136_-	Villus of Intermediate	Female	Han_sites	-
7-66543921	ENSG00000291136_-	Villus of Intermediate	Female	Han_sites	-	ncRNA_intronic	Alu-SINE
19-53214287	ENSG00000291131_-	Villus of Intermediate	Female	down_sites	0.0278307	ncRNA_exonic	Alu-SINE
17-64783164	ENSG00000291117_-	Villus of Maternal	Female	up_sites	0.0149369	ncRNA_exonic	Alu-SINE
3-197612763	ENSG00000291091_-	Umbilical Cord	Female	up_sites	0.0422513	ncRNA_exonic	Alu-SINE
8-144974357	ENSG00000291080_-	Chorion	Female	up_sites	0.0301196	ncRNA_exonic	Alu-SINE
1-1729492	ENSG00000290854_-	Villus of Intermediate	Female	Han_sites	-	ncRNA_intronic	Alu-SINE
1-1729519	ENSG00000290854_-	Villus of Maternal	Female	up_sites	0.0422115	ncRNA_intronic	Alu-SINE
19-56378721	ENSG00000290720_-	Amnion	Female	up_sites	0.0370999	ncRNA_exonic	Alu-SINE
17-68135533	ENSG00000290646_-	Umbilical Cord	Female	down_sites	0.0158609	ncRNA_exonic	-
19-52618557	ENSG00000290073_-	Villus of Fetal	Female	down_sites	0.0138072	ncRNA_intronic	Alu-SINE
19-52618557	ENSG00000290073_-	Villus of Intermediate	Female	down_sites	0.0111334	ncRNA_intronic	Alu-SINE
3-15072774	ENSG00000289750_-	Umbilical Cord	Female	up_sites	0.00222884	ncRNA_intronic	Alu-SINE
3-15072811	ENSG00000289750_-	Umbilical Cord	Female	Han_sites	-	ncRNA_intronic	Alu-SINE
1-145921980	ENSG00000289565_-	Amnion	Female	up_sites	0.0364159	ncRNA_intronic	Alu-SINE
1-145923014	ENSG00000289565_-	Chorion	Female	up_sites	0.00372284	ncRNA_intronic	Alu-SINE
11-123071672	ENSG00000288061_-	Villus of Maternal	Female	up_sites	0.0249025	ncRNA_intronic	Alu-SINE
12-7970384	ENSG00000288043_-	Chorion	Female	up_sites	0.0167376	ncRNA_intronic	Alu-SINE
12-7970452	ENSG00000288043_-	Chorion	Female	up_sites	0.0323444	ncRNA_intronic	Alu-SINE
12-7970530	ENSG00000288043_-	Chorion	Female	up_sites	0.0456708	ncRNA_intronic	Alu-SINE
3-156540349	ENSG00000287916_-	Chorionic Plate	Female	Han_sites	-	ncRNA_exonic	Alu-SINE
3-10152112	ENSG00000287086_-	Villus of Intermediate	Female	Han_sites	-	ncRNA_intronic	Alu-SINE
3-10152158	ENSG00000287086_-	Chorion	Female	up_sites	0.00528812	ncRNA_intronic	Alu-SINE
X-52926240	ENSG00000286118_-	Chorionic Plate	Female	Tibetan_sites	-	ncRNA_exonic	Alu-SINE
19-58584082	ENSG00000286104_-	Amnion	Female	up_sites	0.0120955	ncRNA_exonic	Alu-SINE
15-41302414	ENSG00000285920_-	Umbilical Cord	Female	Han_sites	-	ncRNA_exonic	Alu-SINE
6-149821202	ENSG00000285889_-	Villus of Fetal	Female	up_sites	0.00366987	ncRNA_intronic	Alu-SINE
6-149822258	ENSG00000285889_-	Chorionic Plate	Female	up_sites	0.00450423	ncRNA_intronic	Alu-SINE
6-149824694	ENSG00000285889_-	Amnion	Female	up_sites	0.00424001	ncRNA_intronic	Alu-SINE
6-149825758	ENSG00000285889_-	Chorionic Plate	Female	up_sites	0.0167116	ncRNA_intronic	Alu-SINE
8-66455725	ENSG00000285791_-	Villus of Maternal	Female	up_sites	0.0390835	intronic	Alu-SINE
19-12671434	ENSG00000285589_-	Chorionic Plate	Female	up_sites	0.0136361	UTR3	Alu-SINE
19-12671901	ENSG00000285589_-	Villus of Fetal	Female	up_sites	0.029926	UTR3	Alu-SINE
22-39019906	ENSG00000284554_-	Villus of Fetal	Female	up_sites	0.0300865	UTR3	Alu-SINE
19-49059793	ENSG00000283663_-	Villus of Intermediate	Female	down_sites	0.0175756	intronic	Alu-SINE
19-49059952	ENSG00000283663_-	Chorionic Plate	Female	up_sites	0.0232531	intronic	Alu-SINE
3-49423494	ENSG00000283189_-	Amnion	Female	up_sites	0.0111642	UTR3	Alu-SINE
3-49423513	ENSG00000283189_-	Umbilical Cord	Female	up_sites	0.0299848	UTR3	Alu-SINE
3-49423594	ENSG00000283189_-	Umbilical Cord	Female	up_sites	0.0083331	UTR3	Alu-SINE
3-49423958	ENSG00000283189_-	Umbilical Cord	Female	up_sites	0.00442901	UTR3	Alu-SINE
3-49424054	ENSG00000283189_-	Umbilical Cord	Female	up_sites	0.0485497	UTR3	Alu-SINE
17-5512209	ENSG00000282980_-	Villus of Intermediate	Female	Han_sites	-	ncRNA_exonic	-
12-8888052	ENSG00000282022_-	Amnion	Female	down_sites	0.0359799	ncRNA_intronic	Alu-SINE
12-8888069	ENSG00000282022_-	Amnion	Female	down_sites	0.00538553	ncRNA_intronic	Alu-SINE
11-126346700	ENSG00000280832_-	Umbilical Cord	Female	Han_sites	-	ncRNA_intronic	-
2-233866185	ENSG00000279809_-	Villus of Maternal	Female	up_sites	0.0261032	ncRNA_exonic	-
2-233866419	ENSG00000279809_-	Villus of Intermediate	Female	up_sites	0.0270867	ncRNA_exonic	-
2-233866463	ENSG00000279809_-	Villus of Fetal	Female	up_sites	0.0165807	ncRNA_exonic	-
2-233867117	ENSG00000279809_-	Villus of Intermediate	Female	up_sites	0.0239909	ncRNA_exonic	-
2-233867180	ENSG00000279809_-	Chorionic Plate	Female	up_sites	0.00871423	ncRNA_exonic	-
7-102631661	ENSG00000279168_-	Amnion	Female	Han_sites	-
7-102631664	ENSG00000279168_-	Amnion	Female	Han_sites	-
16-31123342	ENSG00000278133_-	Chorion	Female	up_sites	0.0366708	ncRNA_intronic	Alu-SINE
16-31123343	ENSG00000278133_-	Chorion	Female	up_sites	0.0357001	ncRNA_intronic	Alu-SINE
16-31123383	ENSG00000278133_-	Chorionic Plate	Female	down_sites	0.0214386	ncRNA_intronic	Alu-SINE
16-31123786	ENSG00000278133_-	Amnion	Female	up_sites	0.00671428	ncRNA_exonic	Alu-SINE
17-68135533	ENSG00000277476_-	Umbilical Cord	Female	down_sites	0.0158609	ncRNA_exonic	-
19-2327421	ENSG00000273734_-	Chorion	Female	Han_sites	-	intronic	Alu-SINE
7-128528715	ENSG00000273270_-	Umbilical Cord	Female	up_sites	0.0230393	ncRNA_exonic	Alu-SINE
7-128460449	ENSG00000273184_-	Amnion	Female	down_sites	0.024957	ncRNA_intronic	Alu-SINE
7-128462188	ENSG00000273184_-	Amnion	Female	down_sites	0.01554	ncRNA_intronic	Alu-SINE
7-128470090	ENSG00000273184_-	Amnion	Female	down_sites	0.0107034	ncRNA_intronic	Alu-SINE
7-880140	ENSG00000273151_-	Villus of Fetal	Female	up_sites	0.0370864	ncRNA_exonic	Alu-SINE
7-880218	ENSG00000273151_-	Amnion	Female	down_sites	0.0231486	ncRNA_exonic	Alu-SINE
7-880218	ENSG00000273151_-	Villus of Maternal	Female	up_sites	0.00368774	ncRNA_exonic	Alu-SINE
7-880964	ENSG00000273151_-	Villus of Maternal	Female	up_sites	0.0231105	ncRNA_exonic	Alu-SINE
15-92893938	ENSG00000272888_-	Chorion	Female	down_sites	0.0310557	ncRNA_intronic	Alu-SINE
7-99567952	ENSG00000272647_-	Umbilical Cord	Female	Han_sites	-	intronic	Alu-SINE
7-99568008	ENSG00000272647_-	Umbilical Cord	Female	Han_sites	-	intronic	Alu-SINE
11-47168588	ENSG00000270060_-	Amnion	Female	up_sites	0.0487579	ncRNA_splicing	Alu-SINE
19-57867785	ENSG00000269867_-	Chorionic Plate	Female	down_sites	0.0266407	ncRNA_intronic	Alu-SINE
19-57867810	ENSG00000269867_-	Chorion	Female	down_sites	0.0461345	ncRNA_intronic	Alu-SINE
19-16634605	ENSG00000269427_-	Umbilical Cord	Female	up_sites	0.040551	ncRNA_exonic	Alu-SINE
19-16634683	ENSG00000269427_-	Umbilical Cord	Female	up_sites	0.0455348	ncRNA_exonic	Alu-SINE
19-16640821	ENSG00000269427_-	Umbilical Cord	Female	Han_sites	-	ncRNA_intronic	Alu-SINE
19-16640833	ENSG00000269427_-	Umbilical Cord	Female	Han_sites	-	ncRNA_intronic	Alu-SINE
19-16634605	ENSG00000269044_-	Umbilical Cord	Female	up_sites	0.040551	ncRNA_exonic	Alu-SINE
19-16634683	ENSG00000269044_-	Umbilical Cord	Female	up_sites	0.0455348	ncRNA_exonic	Alu-SINE
19-53214287	ENSG00000269001_-	Villus of Intermediate	Female	down_sites	0.0278307	ncRNA_exonic	Alu-SINE
19-16634605	ENSG00000268790_-	Umbilical Cord	Female	up_sites	0.040551	ncRNA_exonic	Alu-SINE
19-16634683	ENSG00000268790_-	Umbilical Cord	Female	up_sites	0.0455348	ncRNA_exonic	Alu-SINE
19-16640821	ENSG00000268790_-	Umbilical Cord	Female	Han_sites	-	ncRNA_intronic	Alu-SINE
19-16640833	ENSG00000268790_-	Umbilical Cord	Female	Han_sites	-	ncRNA_intronic	Alu-SINE
19-57844380	ENSG00000268750_-	Chorionic Plate	Female	up_sites	0.00248862	UTR3	Alu-SINE
1-1729492	ENSG00000268575_-	Villus of Intermediate	Female	Han_sites	-	ncRNA_intronic	Alu-SINE
1-1729519	ENSG00000268575_-	Villus of Maternal	Female	up_sites	0.0422115	ncRNA_intronic	Alu-SINE
19-57305556	ENSG00000268205_-	Chorion	Female	up_sites	0.0454265	ncRNA_exonic	Alu-SINE
19-57305556	ENSG00000268205_-	Chorionic Plate	Female	down_sites	0.0113972	ncRNA_exonic	Alu-SINE
19-57305648	ENSG00000268205_-	Villus of Fetal	Female	up_sites	0.0409426	ncRNA_exonic	Alu-SINE
19-57364808	ENSG00000268133_-	Villus of Intermediate	Female	down_sites	0.0439236	UTR5	-
19-57364842	ENSG00000268133_-	Chorion	Female	up_sites	0.0285179	synonymous	-
19-16634605	ENSG00000268087_-	Umbilical Cord	Female	up_sites	0.040551	ncRNA_exonic	Alu-SINE
19-16634683	ENSG00000268087_-	Umbilical Cord	Female	up_sites	0.0455348	ncRNA_exonic	Alu-SINE
19-18561466	ENSG00000268030_-	Chorion	Female	Han_sites	-	ncRNA_exonic	Alu-SINE
19-53012908	ENSG00000267943_-	Villus of Maternal	Female	up_sites	0.028084	ncRNA_exonic	Alu-SINE
19-53012909	ENSG00000267943_-	Villus of Intermediate	Female	up_sites	0.00299198	ncRNA_exonic	Alu-SINE
19-13773154	ENSG00000267633_-	Villus of Maternal	Female	Han_sites	-	ncRNA_intronic	Alu-SINE
18-12031708	ENSG00000267480_-	Chorionic Plate	Female	down_sites	0.0220466	ncRNA_exonic	Alu-SINE
17-68135533	ENSG00000267352_-	Umbilical Cord	Female	down_sites	0.0158609	ncRNA_exonic	-
19-5909710	ENSG00000267314_-	Chorion	Female	up_sites	0.00260106	UTR3	Alu-SINE
19-5910937	ENSG00000267314_-	Villus of Maternal	Female	up_sites	0.0453661	intronic	Alu-SINE
17-35459669	ENSG00000267312_-	Villus of Fetal	Female	Han_sites	-	ncRNA_exonic	-
19-55039287	ENSG00000267265_-	Chorion	Female	up_sites	0.00371621	ncRNA_intronic	Alu-SINE
19-55040353	ENSG00000267265_-	Chorion	Female	up_sites	0.0250705	ncRNA_intronic	Alu-SINE
19-55040363	ENSG00000267265_-	Chorion	Female	up_sites	0.0188727	ncRNA_intronic	Alu-SINE
19-55040422	ENSG00000267265_-	Chorion	Female	up_sites	0.0160652	ncRNA_intronic	Alu-SINE
19-55039287	ENSG00000267149_-	Chorion	Female	up_sites	0.00371621	ncRNA_intronic	Alu-SINE
19-55040353	ENSG00000267149_-	Chorion	Female	up_sites	0.0250705	ncRNA_intronic	Alu-SINE
19-55040363	ENSG00000267149_-	Chorion	Female	up_sites	0.0188727	ncRNA_intronic	Alu-SINE
19-55040422	ENSG00000267149_-	Chorion	Female	up_sites	0.0160652	ncRNA_intronic	Alu-SINE
19-35770266	ENSG00000267049_-	Chorion	Female	up_sites	0.00939551	ncRNA_intronic	Alu-SINE
19-35770756	ENSG00000267049_-	Villus of Intermediate	Female	up_sites	0.0177271	ncRNA_exonic	Alu-SINE
19-35770783	ENSG00000267049_-	Villus of Fetal	Female	up_sites	0.0342219	ncRNA_exonic	Alu-SINE
16-89917241	ENSG00000267048_-	Villus of Maternal	Female	up_sites	0.0135195	ncRNA_intronic	Alu-SINE
17-68135533	ENSG00000267023_-	Umbilical Cord	Female	down_sites	0.0158609	ncRNA_exonic	-
17-68424791	ENSG00000267009_-	Chorion	Female	up_sites	0.0136491	ncRNA_intronic	Alu-SINE
17-42549370	ENSG00000266929_-	Chorionic Plate	Female	up_sites	0.0241548	ncRNA_intronic	Alu-SINE
17-64751232	ENSG00000266820_-	Chorion	Female	up_sites	0.000411353	ncRNA_exonic	-
17-32041100	ENSG00000266777_-	Chorion	Female	down_sites	0.0159973	ncRNA_exonic	-
17-32329129	ENSG00000265794_-	Umbilical Cord	Female	up_sites	0.033129	ncRNA_intronic	Alu-SINE
17-64751232	ENSG00000265298_-	Chorion	Female	up_sites	0.000411353	ncRNA_exonic	-
17-32329129	ENSG00000265139_-	Umbilical Cord	Female	up_sites	0.033129	ncRNA_intronic	Alu-SINE
17-17224711	ENSG00000264187_-	Chorion	Female	up_sites	0.0260474	intronic	Alu-SINE
18-32068979	ENSG00000263917_-	Villus of Intermediate	Female	Han_sites	-	ncRNA_intronic	Alu-SINE
17-20317595	ENSG00000263494_-	Umbilical Cord	Female	Han_sites	-	ncRNA_intronic	Alu-SINE
16-9110931	ENSG00000263244_-	Chorion	Female	up_sites	0.0344177	ncRNA_exonic	Alu-SINE
6-31672643	ENSG00000263020_-	Chorionic Plate	Female	up_sites	0.0179625	UTR3	Alu-SINE
6-31672682	ENSG00000263020_-	Chorion	Female	up_sites	0.0126512	UTR3	Alu-SINE
6-31672682	ENSG00000263020_-	Villus of Maternal	Female	up_sites	0.0218069	UTR3	Alu-SINE
6-31673159	ENSG00000263020_-	Chorion	Female	up_sites	0.00186029	UTR3	Alu-SINE
15-42569419	ENSG00000261822_-	Chorion	Female	up_sites	0.00097253	ncRNA_exonic	Alu-SINE
16-75445412	ENSG00000261717_-	Umbilical Cord	Female	up_sites	0.00727746	UTR3	Alu-SINE
16-75446009	ENSG00000261717_-	Villus of Maternal	Female	up_sites	0.00133386	UTR3	Alu-SINE
16-28955119	ENSG00000260853_-	Umbilical Cord	Female	Han_sites	-	ncRNA_intronic	Alu-SINE
16-28955357	ENSG00000260853_-	Chorion	Female	up_sites	0.0163283	ncRNA_intronic	Alu-SINE
16-1359868	ENSG00000260425_-	Villus of Intermediate	Female	Tibetan_sites	-	ncRNA_intronic	Alu-SINE
16-50105226	ENSG00000260381_-	Villus of Fetal	Female	down_sites	0.00981915	ncRNA_intronic	Alu-SINE
16-50105631	ENSG00000260381_-	Umbilical Cord	Female	up_sites	0.0363101	ncRNA_intronic	Alu-SINE
19-52063423	ENSG00000260160_-	Chorion	Female	up_sites	0.0348282	ncRNA_intronic	Alu-SINE
15-83005358	ENSG00000259805_-	Amnion	Female	up_sites	0.0169323	ncRNA_intronic	Alu-SINE
15-83005358	ENSG00000259805_-	Chorion	Female	up_sites	0.0010455	ncRNA_intronic	Alu-SINE
15-83005409	ENSG00000259805_-	Chorion	Female	up_sites	0.00474705	ncRNA_intronic	Alu-SINE
14-65280799	ENSG00000259078_-	Villus of Intermediate	Female	Han_sites	-	ncRNA_exonic	-
14-50327645	ENSG00000259071_-	Villus of Maternal	Female	up_sites	0.0185555	ncRNA_intronic	Alu-SINE
14-52776141	ENSG00000259049_-	Chorion	Female	up_sites	0.0261751	ncRNA_intronic	Alu-SINE
14-52776694	ENSG00000259049_-	Chorion	Female	up_sites	0.00609743	ncRNA_intronic	Alu-SINE
14-65280799	ENSG00000258760_-	Villus of Intermediate	Female	Han_sites	-	ncRNA_exonic	-
14-100366660	ENSG00000258581_-	Villus of Fetal	Female	down_sites	0.0221845	ncRNA_exonic	-
14-100366675	ENSG00000258581_-	Chorionic Plate	Female	down_sites	0.0343785	ncRNA_exonic	-
14-100366675	ENSG00000258581_-	Villus of Fetal	Female	down_sites	0.00172779	ncRNA_exonic	-
14-100366682	ENSG00000258581_-	Villus of Fetal	Female	down_sites	0.00121816	ncRNA_exonic	-
14-100366689	ENSG00000258581_-	Chorionic Plate	Female	down_sites	0.0484976	ncRNA_exonic	-
14-100366689	ENSG00000258581_-	Villus of Fetal	Female	down_sites	0.00539569	ncRNA_exonic	-
10-117485631	ENSG00000258114_-	Chorion	Female	up_sites	0.0276557	ncRNA_exonic	Alu-SINE
14-103682551	ENSG00000256500_-	Chorionic Plate	Female	up_sites	0.0343785	ncRNA_exonic	Alu-SINE
14-103682554	ENSG00000256500_-	Villus of Fetal	Female	Han_sites	-	ncRNA_exonic	Alu-SINE
16-10529687	ENSG00000256013_-	Chorion	Female	up_sites	0.0456253	ncRNA_exonic	Alu-SINE
16-10529701	ENSG00000256013_-	Chorion	Female	up_sites	0.00689323	ncRNA_splicing	Alu-SINE
16-10531244	ENSG00000256013_-	Umbilical Cord	Female	Han_sites	-	ncRNA_intronic	Alu-SINE
16-10531390	ENSG00000256013_-	Villus of Maternal	Female	Tibetan_sites	-	ncRNA_intronic	Alu-SINE
16-10531456	ENSG00000256013_-	Chorion	Female	up_sites	0.00185266	ncRNA_intronic	Alu-SINE
16-10531468	ENSG00000256013_-	Chorion	Female	up_sites	0.0126893	ncRNA_intronic	Alu-SINE
16-10531557	ENSG00000256013_-	Villus of Maternal	Female	up_sites	0.0194862	ncRNA_intronic	Alu-SINE
16-31089734	ENSG00000255439_-	Umbilical Cord	Female	Han_sites	-	intronic	Alu-SINE
11-74455795	ENSG00000254928_-	Villus of Fetal	Female	Han_sites	-	ncRNA_intronic	Alu-SINE
11-74455801	ENSG00000254928_-	Villus of Maternal	Female	up_sites	0.00604373	ncRNA_intronic	Alu-SINE
8-43020593	ENSG00000254673_-	Chorion	Female	up_sites	0.0247145	UTR3	Alu-SINE
8-43020843	ENSG00000254673_-	Villus of Fetal	Female	down_sites	0.0411738	UTR3	Alu-SINE
10-28525595	ENSG00000254635_-	Chorion	Female	down_sites	0.00655935	ncRNA_intronic	Alu-SINE
11-74455795	ENSG00000254631_-	Villus of Fetal	Female	Han_sites	-	ncRNA_intronic	Alu-SINE
11-74455801	ENSG00000254631_-	Villus of Maternal	Female	up_sites	0.00604373	ncRNA_intronic	Alu-SINE
11-119004726	ENSG00000254428_-	Villus of Intermediate	Female	up_sites	0.00384153	ncRNA_exonic	Alu-SINE
8-120052475	ENSG00000254343_-	Chorion	Female	up_sites	0.00454637	ncRNA_intronic	Alu-SINE
8-94792699	ENSG00000254307_-	Villus of Intermediate	Female	up_sites	0.0487801	ncRNA_intronic	Alu-SINE
8-94792699	ENSG00000254307_-	Villus of Maternal	Female	up_sites	0.0255331	ncRNA_intronic	Alu-SINE
8-94792709	ENSG00000254307_-	Umbilical Cord	Female	up_sites	0.0219009	ncRNA_intronic	Alu-SINE
8-39969754	ENSG00000253939_-	Villus of Maternal	Female	Tibetan_sites	-	ncRNA_intronic	Alu-SINE
8-39977574	ENSG00000253939_-	Villus of Intermediate	Female	down_sites	0.0359233	ncRNA_intronic	Alu-SINE
4-86914805	ENSG00000251411_-	Chorionic Plate	Female	down_sites	0.0349867	ncRNA_exonic	-
5-149412675	ENSG00000249669_-	Umbilical Cord	Female	up_sites	0.0405762	ncRNA_exonic	Alu-SINE
21-33591875	ENSG00000249209_-	Umbilical Cord	Female	Han_sites	-	intronic	Alu-SINE
21-33593809	ENSG00000249209_-	Umbilical Cord	Female	Han_sites	-	intronic	Alu-SINE
14-103682551	ENSG00000246451_-	Chorionic Plate	Female	up_sites	0.0343785	ncRNA_exonic	Alu-SINE
14-103682554	ENSG00000246451_-	Villus of Fetal	Female	Han_sites	-	ncRNA_exonic	Alu-SINE
15-50357569	ENSG00000244879_-	Villus of Fetal	Female	Han_sites	-	ncRNA_exonic	Alu-SINE
15-50366593	ENSG00000244879_-	Villus of Maternal	Female	Han_sites	-	ncRNA_exonic	Alu-SINE
7-128653445	ENSG00000242588_-	Chorionic Plate	Female	down_sites	0.0127124	ncRNA_exonic	-
7-128661209	ENSG00000242588_-	Villus of Fetal	Female	Han_sites	-	ncRNA_exonic	Alu-SINE
3-179397847	ENSG00000242539_-	Chorion	Female	up_sites	0.0269764	ncRNA_exonic	Alu-SINE
3-179398001	ENSG00000242539_-	Chorionic Plate	Female	down_sites	0.00358529	ncRNA_intronic	Alu-SINE
2-99196002	ENSG00000241962_-	Villus of Intermediate	Female	up_sites	0.00479668	UTR3	Alu-SINE
X-131795803	ENSG00000241418_-	Chorionic Plate	Female	up_sites	0.0248456	ncRNA_exonic	-
X-131795880	ENSG00000241418_-	Villus of Fetal	Female	up_sites	0.0347543	ncRNA_exonic	-
7-128460449	ENSG00000240758_-	Amnion	Female	down_sites	0.024957	ncRNA_intronic	Alu-SINE
7-128462188	ENSG00000240758_-	Amnion	Female	down_sites	0.01554	ncRNA_intronic	Alu-SINE
1-1317933	ENSG00000240731_-	Chorion	Female	up_sites	0.0143875	ncRNA_intronic	Alu-SINE
1-1317934	ENSG00000240731_-	Chorion	Female	up_sites	0.019835	ncRNA_intronic	Alu-SINE
1-1317981	ENSG00000240731_-	Umbilical Cord	Female	up_sites	0.00631796	ncRNA_intronic	Alu-SINE
1-1317996	ENSG00000240731_-	Chorion	Female	up_sites	0.0437156	ncRNA_intronic	Alu-SINE
1-1318006	ENSG00000240731_-	Chorion	Female	up_sites	0.0322093	ncRNA_intronic	Alu-SINE
1-1318636	ENSG00000240731_-	Chorion	Female	up_sites	0.00315792	ncRNA_exonic	Alu-SINE
7-151503389	ENSG00000240132_-	Villus of Intermediate	Female	Han_sites	-	ncRNA_exonic	-
11-67683044	ENSG00000239559_-	Villus of Intermediate	Female	Han_sites	-	ncRNA_exonic	-
X-40835089	ENSG00000238222_-	Chorionic Plate	Female	Han_sites	-	ncRNA_exonic	-
1-176616473	ENSG00000237514_-	Villus of Fetal	Female	down_sites	0.0118053	ncRNA_exonic	-
7-66543831	ENSG00000234500_-	Villus of Intermediate	Female	Han_sites	-
7-66543921	ENSG00000234500_-	Villus of Intermediate	Female	Han_sites	-	ncRNA_intronic	Alu-SINE
1-68162563	ENSG00000234383_-	Umbilical Cord	Female	Han_sites	-	ncRNA_exonic	-
2-74418365	ENSG00000233155_-	Amnion	Female	Tibetan_sites	-	synonymous	-
2-206122202	ENSG00000231955_-	Villus of Intermediate	Female	down_sites	0.0388917	ncRNA_exonic	Alu-SINE
2-206122221	ENSG00000231955_-	Chorionic Plate	Female	down_sites	0.0463474	ncRNA_exonic	Alu-SINE
7-5476999	ENSG00000230733_-	Villus of Fetal	Female	Han_sites	-	ncRNA_exonic	Alu-SINE
3-45680795	ENSG00000230530_-	Umbilical Cord	Female	down_sites	0.0423746	ncRNA_intronic	Alu-SINE
3-45680938	ENSG00000230530_-	Umbilical Cord	Female	up_sites	0.0238955	ncRNA_intronic	Alu-SINE
13-110898841	ENSG00000229152_-	Umbilical Cord	Female	Han_sites	-	ncRNA_intronic	Alu-SINE
13-110898852	ENSG00000229152_-	Umbilical Cord	Female	Han_sites	-	ncRNA_intronic	Alu-SINE
13-110898976	ENSG00000229152_-	Chorion	Female	up_sites	0.0191877	ncRNA_intronic	Alu-SINE
13-110899024	ENSG00000229152_-	Chorion	Female	up_sites	0.0280397	ncRNA_intronic	Alu-SINE
1-214351153	ENSG00000228470_-	Villus of Intermediate	Female	up_sites	0.0454776	ncRNA_intronic	Alu-SINE
1-231021928	ENSG00000227934_-	Villus of Maternal	Female	up_sites	0.0302678	ncRNA_exonic	-
1-1729492	ENSG00000227775_-	Villus of Intermediate	Female	Han_sites	-	ncRNA_intronic	Alu-SINE
1-1729519	ENSG00000227775_-	Villus of Maternal	Female	up_sites	0.0422115	ncRNA_intronic	Alu-SINE
10-100233036	ENSG00000227492_-	Chorion	Female	up_sites	0.00962571	ncRNA_intronic	Alu-SINE
10-100233141	ENSG00000227492_-	Villus of Maternal	Female	up_sites	0.0401889	ncRNA_intronic	Alu-SINE
1-26877933	ENSG00000226698_-	Umbilical Cord	Female	Han_sites	-	ncRNA_intronic	Alu-SINE
21-36130880	ENSG00000226054_-	Chorionic Plate	Female	down_sites	0.00861349	ncRNA_exonic	-
9-129287148	ENSG00000224307_-	Chorion	Female	Han_sites	-	ncRNA_intronic	Alu-SINE
15-36817943	ENSG00000223518_-	Villus of Maternal	Female	up_sites	0.0362965	ncRNA_exonic	-
15-36817949	ENSG00000223518_-	Villus of Maternal	Female	up_sites	0.0249163	ncRNA_exonic	-
15-36817952	ENSG00000223518_-	Villus of Maternal	Female	up_sites	0.0421523	ncRNA_exonic	-
15-36817956	ENSG00000223518_-	Villus of Maternal	Female	up_sites	0.00409515	ncRNA_exonic	-
15-36817963	ENSG00000223518_-	Villus of Maternal	Female	up_sites	0.0165505	ncRNA_exonic	-
6-149592794	ENSG00000220848_-	Umbilical Cord	Female	Han_sites	-	ncRNA_exonic	Alu-SINE
6-149592824	ENSG00000220848_-	Umbilical Cord	Female	Han_sites	-	ncRNA_exonic	Alu-SINE
6-111047477	ENSG00000218803_-	Villus of Intermediate	Female	Han_sites	-	ncRNA_exonic	-
6-27737281	ENSG00000216915_-	Villus of Intermediate	Female	Han_sites	-	ncRNA_exonic	-
X-75741365	ENSG00000215105_-	Amnion	Female	up_sites	0.041049	ncRNA_exonic	-
X-75741413	ENSG00000215105_-	Amnion	Female	up_sites	0.0143959	ncRNA_exonic	-
7-64569734	ENSG00000213642_-	Umbilical Cord	Female	Han_sites	-	ncRNA_exonic	-
2-152390071	ENSG00000213197_-	Villus of Maternal	Female	Han_sites	-	ncRNA_exonic	-
X-71420214	ENSG00000213018_-	Villus of Intermediate	Female	Han_sites	-	ncRNA_exonic	-
7-102631661	ENSG00000205236_-	Amnion	Female	Han_sites	-
7-102631664	ENSG00000205236_-	Amnion	Female	Han_sites	-
1-207769043	ENSG00000203709_-	Umbilical Cord	Female	up_sites	0.00976397	ncRNA_intronic	Alu-SINE
1-207769199	ENSG00000203709_-	Umbilical Cord	Female	up_sites	0.0219982	ncRNA_intronic	Alu-SINE
1-207769818	ENSG00000203709_-	Chorion	Female	up_sites	0.00102386	ncRNA_intronic	Alu-SINE
1-207769837	ENSG00000203709_-	Umbilical Cord	Female	up_sites	0.0111065	ncRNA_intronic	Alu-SINE
1-10459007	ENSG00000203469_-	Villus of Intermediate	Female	up_sites	0.0333734	ncRNA_intronic	Alu-SINE
X-100911167	ENSG00000179031_-	Villus of Fetal	Female	down_sites	0.0177834	ncRNA_exonic	-
15-84641599	ENSG00000176700_-	Chorion	Female	up_sites	0.0270798	ncRNA_exonic	Alu-SINE
13-45390118	ENSG00000170919_-	Villus of Maternal	Female	Han_sites	-	ncRNA_exonic	-
2-74418365	ENSG00000159239_-	Amnion	Female	Tibetan_sites	-	synonymous	-
19-16550487	ENSG00000141979_-	Amnion	Female	up_sites	0.00895699	UTR3	Alu-SINE

## Sheet: 4
Supplementary table 4. human placental tissues share differential RNA editing sites
Gene	RNA editing sites	Sex	Number of tissues
ENSG00000119812_FAM98A	2-33584227	Male	6
ENSG00000119812_RASGRP3-AS1	2-33584227	Male	6
ENSG00000164733_CTSB	8-11843176	Male	6
ENSG00000106077_ABHD11	7-73736181	Male	4
ENSG00000126775_ATG14	14-55367499	Male	4
ENSG00000178974_FBXO34	14-55367499	Male	4
ENSG00000053372_MRTO4	1-19259964	Male	3
ENSG00000116237_ICMT	1-6223246	Female	3
ENSG00000126775_ATG14	14-55367486	Male	3
ENSG00000145819_ARHGAP26	5-143225288	Male	3
ENSG00000162441_LZIC	1-9927426	Male	3
ENSG00000162441_LZIC	1-9928089	Male	3
ENSG00000168575_SLC20A2	8-42534196	Male	3
ENSG00000178974_FBXO34	14-55367486	Male	3
ENSG00000075415_SLC25A3	12-98604855	Male	2
ENSG00000075415_SLC25A3	12-98606008	Male	2
ENSG00000079332_SAR1A	10-70163639	Male	2
ENSG00000088888_MAVS	20-3867511	Female	2
ENSG00000088888_MAVS	20-3868363	Female	2
ENSG00000100299_ARSA	22-50624069	Female	2
ENSG00000100522_GNPNAT1	14-52775933	Male	2
ENSG00000101294_HM13	20-31547767	Male	2
ENSG00000101294_HM13	20-31547806	Male	2
ENSG00000101294_HM13	20-31548031	Female	2
ENSG00000101898_MCTS2	20-31547767	Male	2
ENSG00000101898_MCTS2	20-31547806	Male	2
ENSG00000101898_MCTS2	20-31548031	Female	2
ENSG00000102317_RBM3	X-48578498	Female	2
ENSG00000102910_LONP2	16-48354334	Male	2
ENSG00000104881_PPP1R13L	19-45393185	Male	2
ENSG00000104881_PPP1R13L	19-45394270	Male	2
ENSG00000105372_RPS19	19-41871486	Male	2
ENSG00000105968_H2AZ2	7-44832828	Male	2
ENSG00000110090_CPT1A	11-68756004	Male	2
ENSG00000111450_STX2	12-130802709	Male	2
ENSG00000116199_FAM20B	1-179073409	Male	2
ENSG00000116199_FAM20B	1-179075061	Male	2
ENSG00000117868_ESYT2	7-158738646	Male	2
ENSG00000119616_FCF1	14-74736292	Male	2
ENSG00000119820_YIPF4	2-32310622	Female	2
ENSG00000120256_LRP11	6-149822103	Male	2
ENSG00000124541_RRP36	6-43029803	Male	2
ENSG00000124541_RRP36	6-43030364	Male	2
ENSG00000124541_RRP36	6-43030457	Male	2
ENSG00000126775_ATG14	14-55367526	Male	2
ENSG00000126775_ATG14	14-55367578	Male	2
ENSG00000127463_EMC1	1-19215962	Female	2
ENSG00000127463_EMC1	1-19216963	Male	2
ENSG00000127526_SLC35E1	19-16550487	Male	2
ENSG00000127526_SLC35E1	19-16550565	Male	2
ENSG00000130119_GNL3L	X-54562226	Female	2
ENSG00000130119_GNL3L	X-54563555	Male	2
ENSG00000132199_ENOSF1	18-692496	Female	2
ENSG00000134297_PLEKHA8P1	12-45173919	Female	2
ENSG00000136068_FLNB	3-58141198	Female	2
ENSG00000136731_UGGT1	2-128193345	Male	2
ENSG00000138600_SPPL2A	15-50703459	Female	2
ENSG00000139631_CSAD	12-53178982	Male	2
ENSG00000140105_WARS1	14-100366675	Female	2
ENSG00000140105_WARS1	14-100366689	Female	2
ENSG00000140199_SLC12A6	15-34231142	Male	2
ENSG00000146223_RPL7L1	6-42888438	Male	2
ENSG00000149639_SOGA1	20-36781998	Male	2
ENSG00000156162_DPY19L4	8-94792699	Female	2
ENSG00000160049_DFFA	1-10460762	Male	2
ENSG00000160194_NDUFV3	21-42911187	Female	2
ENSG00000160209_PDXK	21-43730255	Female	2
ENSG00000162378_ZYG11B	1-52824014	Male	2
ENSG00000163249_CCNYL1	2-207755025	Female	2
ENSG00000163466_ARPC2	2-218235293	Male	2
ENSG00000164733_CTSB	8-11842864	Male	2
ENSG00000164828_SUN1	7-880218	Female	2
ENSG00000166295_ANAPC16	10-72235070	Female	2
ENSG00000166441_RPL27A	11-8686293	Male	2
ENSG00000167113_COQ4	9-128331690	Female	2
ENSG00000167766_ZNF83	19-52618557	Female	2
ENSG00000168724_DNAJC21	5-34952893	Female	2
ENSG00000169609_C15orf40	15-83005358	Female	2
ENSG00000174839_DENND6A	3-57626544	Female	2
ENSG00000177225_GATD1	11-768347	Male	2
ENSG00000177675_CD163L1	12-7439788	Female	2
ENSG00000177932_ZNF354C	5-179082611	Male	2
ENSG00000178974_FBXO34	14-55367526	Male	2
ENSG00000178974_FBXO34	14-55367578	Male	2
ENSG00000182240_BACE2	21-41174281	Female	2
ENSG00000183171_LOC643015	X-150114851	Female	2
ENSG00000185561_TLCD2	17-1703540	Male	2
ENSG00000185634_SHC4	15-48879140	Female	2
ENSG00000186001_LRCH3	3-197885531	Male	2
ENSG00000186197_EDARADD	1-236483988	Female	2
ENSG00000189144_ZNF573	19-37792481	Male	2
ENSG00000196968_FUT11	10-73776542	Male	2
ENSG00000196968_FUT11	10-73778381	Male	2
ENSG00000197756_RPL37A	2-216502207	Male	2
ENSG00000198466_ZNF587	19-57860381	Male	2
ENSG00000204514_ZNF814	19-57860381	Male	2
ENSG00000213225_NOC2LP1	2-130230106	Male	2
ENSG00000213225_NOC2LP1	2-130230122	Female	2
ENSG00000213753_CENPBD2P	19-58584115	Male	2
ENSG00000213753_RPL23AP79	19-58584115	Male	2
ENSG00000213753_CENPBD2P	19-58584206	Male	2
ENSG00000213753_RPL23AP79	19-58584206	Male	2
ENSG00000224287_MSL3P1	2-233866966	Male	2
ENSG00000224287_MSL3P1	2-233867085	Male	2
ENSG00000224287_MSL3P1	2-233867117	Male	2
ENSG00000230424_EMC1-AS1	1-19215962	Female	2
ENSG00000230424_EMC1-AS1	1-19216963	Male	2
ENSG00000230590_FTX	X-74276500	Female	2
ENSG00000230870_FBXW11P1	21-31627240	Male	2
ENSG00000235703_EOLA2-DT	X-150114851	Female	2
ENSG00000239857_GET4	7-880218	Female	2
ENSG00000240053_LY6G5B	6-31672682	Female	2
ENSG00000242498_ARPIN	15-89901496	Male	2
ENSG00000244457_ENO1P1	1-236483988	Female	2
ENSG00000247077_PGAM5	12-132721837	Male	2
ENSG00000250021_ARPIN-AP3S2	15-89901496	Male	2
ENSG00000255302_EID1	15-48879140	Female	2
ENSG00000255836_LOC100419928	12-7439788	Female	2
ENSG00000285458_C4orf36	4-86914291	Male	2
ENSG00000285991_RAET1E	6-149822103	Male	2
ENSG00000001630_CYP51A1	7-92092700	Female	1
ENSG00000002586_CD99	X-2717254	Male	1
ENSG00000003400_CASP10	2-201218007	Female	1
ENSG00000003400_CASP10	2-201219195	Male	1
ENSG00000003402_CFLAR	2-201165436	Male	1
ENSG00000003756_RBM5	3-50112973	Male	1
ENSG00000003756_RBM5	3-50113054	Male	1
ENSG00000006715_VPS41	7-38723468	Female	1
ENSG00000006715_VPS41	7-38723531	Male	1
ENSG00000006715_VPS41	7-38724686	Female	1
ENSG00000006715_VPS41	7-38724705	Male	1
ENSG00000006715_VPS41	7-38724758	Male	1
ENSG00000006756_ARSD	X-2906302	Male	1
ENSG00000006756_ARSD	X-2906875	Female	1
ENSG00000006756_ARSD	X-2906942	Male	1
ENSG00000008294_SPAG9	17-50964917	Male	1
ENSG00000008294_SPAG9	17-50964962	Male	1
ENSG00000010704_HFE	6-26095234	Female	1
ENSG00000010704_HFE	6-26095240	Female	1
ENSG00000010704_HFE	6-26095240	Male	1
ENSG00000010704_HFE	6-26095289	Male	1
ENSG00000010704_HFE	6-26095317	Female	1
ENSG00000010704_HFE	6-26095323	Female	1
ENSG00000010704_HFE	6-26095406	Female	1
ENSG00000010704_HFE	6-26095414	Male	1
ENSG00000010704_HFE	6-26096234	Male	1
ENSG00000010704_HFE	6-26096395	Female	1
ENSG00000010704_HFE	6-26096396	Male	1
ENSG00000010704_HFE	6-26096408	Male	1
ENSG00000011275_RNF216	7-5686040	Female	1
ENSG00000011465_DCN	12-91148212	Female	1
ENSG00000011478_QPCTL	19-45703567	Female	1
ENSG00000013441_CLK1	2-200856342	Female	1
ENSG00000018610_STEEP1	X-119538506	Female	1
ENSG00000018610_STEEP1	X-119538510	Male	1
ENSG00000018610_STEEP1	X-119538562	Female	1
ENSG00000018610_STEEP1	X-119538562	Male	1
ENSG00000018869_ZNF582	19-56378721	Female	1
ENSG00000018869_ZNF582	19-56379238	Male	1
ENSG00000018869_ZNF582	19-56379334	Male	1
ENSG00000018869_ZNF582	19-56379406	Male	1
ENSG00000020922_MRE11	11-94417105	Male	1
ENSG00000022556_NLRP2	19-54991644	Female	1
ENSG00000022556_NLRP2	19-54992742	Male	1
ENSG00000022556_NLRP2	19-54992769	Female	1
ENSG00000022556_NLRP2	19-54993018	Female	1
ENSG00000023228_NDUFS1	2-206116967	Male	1
ENSG00000023228_NDUFS1	2-206116975	Male	1
ENSG00000023228_NDUFS1	2-206119005	Male	1
ENSG00000023228_NDUFS1	2-206122202	Female	1
ENSG00000023228_NDUFS1	2-206122221	Female	1
ENSG00000023228_NDUFS1	2-206122372	Male	1
ENSG00000023228_NDUFS1	2-206122418	Male	1
ENSG00000023228_NDUFS1	2-206122472	Male	1
ENSG00000023228_NDUFS1	2-206122480	Male	1
ENSG00000023228_NDUFS1	2-206122499	Male	1
ENSG00000023228_NDUFS1	2-206122616	Male	1
ENSG00000023228_NDUFS1	2-206122837	Male	1
ENSG00000023228_NDUFS1	2-206122873	Male	1
ENSG00000023608_SNAPC1	14-61795894	Male	1
ENSG00000023608_SNAPC1	14-61795946	Male	1
ENSG00000029725_RABEP1	17-5382859	Female	1
ENSG00000037757_MRI1	19-13767429	Male	1
ENSG00000037757_MRI1	19-13773154	Female	1
ENSG00000037757_MRI1	19-13773247	Male	1
ENSG00000037757_MRI1	19-13773701	Male	1
ENSG00000037757_MRI1	19-13773855	Male	1
ENSG00000050393_MCUR1	6-13788158	Female	1
ENSG00000050393_MCUR1	6-13789155	Male	1
ENSG00000050405_LIMA1	12-50201652	Female	1
ENSG00000050405_LIMA1	12-50203228	Male	1
ENSG00000051620_HEBP2	6-138412688	Male	1
ENSG00000052344_PRSS8	16-31132599	Male	1
ENSG00000053372_MRTO4	1-19259059	Male	1
ENSG00000055332_EIF2AK2	2-37100559	Female	1
ENSG00000055332_EIF2AK2	2-37100938	Female	1
ENSG00000055332_EIF2AK2	2-37100944	Male	1
ENSG00000055332_EIF2AK2	2-37102095	Male	1
ENSG00000055332_EIF2AK2	2-37103288	Male	1
ENSG00000057252_SOAT1	1-179357875	Male	1
ENSG00000059804_SLC2A3	12-7964053	Male	1
ENSG00000059804_SLC2A3	12-7964147	Male	1
ENSG00000059804_SLC2A3	12-7970384	Female	1
ENSG00000059804_SLC2A3	12-7970442	Male	1
ENSG00000059804_SLC2A3	12-7970452	Female	1
ENSG00000059804_SLC2A3	12-7970468	Male	1
ENSG00000059804_SLC2A3	12-7970498	Male	1
ENSG00000059804_SLC2A3	12-7970530	Female	1
ENSG00000059804_SLC2A3	12-7970530	Male	1
ENSG00000060339_CCAR1	10-68757606	Male	1
ENSG00000060339_CCAR1	10-68759232	Female	1
ENSG00000060339_CCAR1	10-68759278	Male	1
ENSG00000060339_CCAR1	10-68759294	Male	1
ENSG00000060339_CCAR1	10-68759312	Male	1
ENSG00000060339_CCAR1	10-68760183	Male	1
ENSG00000060339_CCAR1	10-68776647	Female	1
ENSG00000060982_BCAT1	12-24816887	Male	1
ENSG00000064012_CASP8	2-201287339	Male	1
ENSG00000064012_CASP8	2-201287355	Male	1
ENSG00000064012_CASP8	2-201287383	Male	1
ENSG00000064601_CTSA	20-45895674	Male	1
ENSG00000064601_CTSA	20-45895805	Male	1
ENSG00000064601_CTSA	20-45896115	Male	1
ENSG00000064601_CTSA	20-45896127	Female	1
ENSG00000067606_PRKCZ	1-2171495	Female	1
ENSG00000068028_RASSF1	3-50332595	Male	1
ENSG00000068028_RASSF1	3-50333726	Male	1
ENSG00000068323_TFE3	X-49035197	Male	1
ENSG00000068831_RASGRP2	11-64738578	Female	1
ENSG00000070404_FSTL3	19-682421	Female	1
ENSG00000070540_WIPI1	17-68424791	Female	1
ENSG00000070540_WIPI1	17-68424794	Male	1
ENSG00000071655_MBD3	19-1582040	Male	1
ENSG00000071655_MBD3	19-1587539	Male	1
ENSG00000072135_PTPN18	2-130362244	Male	1
ENSG00000072864_NDE1	16-15700252	Male	1
ENSG00000072864_NDE1	16-15700334	Male	1
ENSG00000072864_NDE1	16-15701100	Male	1
ENSG00000072864_NDE1	16-15701178	Male	1
ENSG00000072864_NDE1	16-15701187	Male	1
ENSG00000073008_PVR	19-44665523	Male	1
ENSG00000073008_PVR	19-44665527	Male	1
ENSG00000073060_SCARB1	12-124783736	Female	1
ENSG00000073169_SELENOO	22-50214241	Male	1
ENSG00000073605_GSDMB	17-39918833	Female	1
ENSG00000073605_GSDMB	17-39919842	Male	1
ENSG00000074356_NCBP3	17-3823622	Male	1
ENSG00000074842_MYDGF	19-4654585	Female	1
ENSG00000075415_SLC25A3	12-98605298	Female	1
ENSG00000075415_SLC25A3	12-98605700	Male	1
ENSG00000075415_SLC25A3	12-98605857	Male	1
ENSG00000075415_SLC25A3	12-98606012	Female	1
ENSG00000075790_BCAP29	7-107628705	Male	1
ENSG00000076067_RBMS2	12-56577575	Male	1
ENSG00000076067_RBMS2	12-56578363	Male	1
ENSG00000077721_UBE2A	X-119538506	Female	1
ENSG00000077721_UBE2A	X-119538510	Male	1
ENSG00000077721_UBE2A	X-119538562	Female	1
ENSG00000077721_UBE2A	X-119538562	Male	1
ENSG00000078124_ACER3	11-77023963	Female	1
ENSG00000078699_CBFA2T2	20-33646754	Female	1
ENSG00000079819_EPB41L2	6-130875816	Female	1
ENSG00000081307_UBA5	3-132678840	Female	1
ENSG00000081307_UBA5	3-132678859	Female	1
ENSG00000081870_HSPB11	1-53922223	Female	1
ENSG00000083099_LYRM2	6-89634852	Male	1
ENSG00000083828_ZNF586	19-57787421	Male	1
ENSG00000084623_EIF3I	1-32230724	Male	1
ENSG00000086061_DNAJA1	9-33038134	Female	1
ENSG00000087157_PGS1	17-78422615	Female	1
ENSG00000087157_PGS1	17-78422975	Male	1
ENSG00000087266_SH3BP2	4-2839825	Male	1
ENSG00000087269_NOP14	4-2938420	Male	1
ENSG00000087269_NOP14	4-2938620	Male	1
ENSG00000087269_NOP14	4-2938670	Male	1
ENSG00000088448_ANKRD10	13-110898841	Female	1
ENSG00000088448_ANKRD10	13-110898852	Female	1
ENSG00000088448_ANKRD10	13-110898975	Male	1
ENSG00000088448_ANKRD10	13-110898976	Female	1
ENSG00000088448_ANKRD10	13-110899024	Female	1
ENSG00000088448_ANKRD10	13-110900009	Male	1
ENSG00000088888_MAVS	20-3867511	Male	1
ENSG00000088888_MAVS	20-3868433	Male	1
ENSG00000088888_MAVS	20-3868448	Male	1
ENSG00000088888_MAVS	20-3868479	Female	1
ENSG00000088888_MAVS	20-3868497	Male	1
ENSG00000088888_MAVS	20-3868754	Male	1
ENSG00000088888_MAVS	20-3868756	Male	1
ENSG00000088888_MAVS	20-3868762	Male	1
ENSG00000088888_MAVS	20-3869447	Female	1
ENSG00000088888_MAVS	20-3869704	Male	1
ENSG00000088888_MAVS	20-3869709	Male	1
ENSG00000088888_MAVS	20-3869734	Male	1
ENSG00000088888_MAVS	20-3872182	Male	1
ENSG00000089050_RBBP9	20-18487695	Male	1
ENSG00000089053_ANAPC5	12-121331976	Female	1
ENSG00000089053_ANAPC5	12-121331976	Male	1
ENSG00000089053_ANAPC5	12-121332249	Female	1
ENSG00000090581_GNPTG	16-1359868	Female	1
ENSG00000090615_GOLGA3	12-132770186	Female	1
ENSG00000090615_GOLGA3	12-132770861	Male	1
ENSG00000090924_PLEKHG2	19-39427577	Male	1
ENSG00000091592_NLRP1	17-5512209	Female	1
ENSG00000091986_CCDC80	3-112601611	Male	1
ENSG00000095485_CWF19L1	10-100232541	Male	1
ENSG00000095485_CWF19L1	10-100233036	Female	1
ENSG00000095485_CWF19L1	10-100233141	Female	1
ENSG00000095637_SORBS1	10-95390860	Male	1
ENSG00000099246_RAB18	10-27538999	Female	1
ENSG00000099326_MZF1	19-58568046	Male	1
ENSG00000099795_NDUFB7	19-14568165	Male	1
ENSG00000099910_KLHL22	22-20450911	Male	1
ENSG00000099910_KLHL22	22-20450984	Male	1
ENSG00000099910_KLHL22	22-20451010	Male	1
ENSG00000099910_KLHL22	22-20451011	Male	1
ENSG00000099910_KLHL22	22-20451106	Male	1
ENSG00000099917_MED15	22-20572663	Female	1
ENSG00000099917_MED15	22-20573242	Male	1
ENSG00000099940_SNAP29	22-20890638	Male	1
ENSG00000100028_SNRPD3	22-24573003	Male	1
ENSG00000100028_SNRPD3	22-24573015	Male	1
ENSG00000100028_SNRPD3	22-24573832	Male	1
ENSG00000100028_SNRPD3	22-24574708	Female	1
ENSG00000100028_SNRPD3	22-24574716	Female	1
ENSG00000100036_SLC35E4	22-30660998	Male	1
ENSG00000100077_GRK3	22-25649044	Male	1
ENSG00000100138_SNU13	22-41676896	Male	1
ENSG00000100226_GTPBP1	22-38723136	Male	1
ENSG00000100226_GTPBP1	22-38723309	Male	1
ENSG00000100234_TIMP3	22-32861081	Male	1
ENSG00000100239_PPP6R2	22-50442676	Female	1
ENSG00000100299_ARSA	22-50624200	Male	1
ENSG00000100342_APOL1	22-36266350	Male	1
ENSG00000100342_APOL1	22-36266351	Male	1
ENSG00000100342_APOL1	22-36266825	Female	1
ENSG00000100418_DESI1	22-41599953	Male	1
ENSG00000100418_DESI1	22-41600057	Male	1
ENSG00000100418_DESI1	22-41600160	Female	1
ENSG00000100478_AP4S1	14-31095954	Male	1
ENSG00000100478_AP4S1	14-31095991	Male	1
ENSG00000100478_AP4S1	14-31096006	Male	1
ENSG00000100490_CDKL1	14-50327645	Female	1
ENSG00000100490_CDKL1	14-50327645	Male	1
ENSG00000100522_GNPNAT1	14-52776141	Female	1
ENSG00000100522_GNPNAT1	14-52776688	Male	1
ENSG00000100522_GNPNAT1	14-52776693	Male	1
ENSG00000100522_GNPNAT1	14-52776694	Female	1
ENSG00000100522_GNPNAT1	14-52776827	Male	1
ENSG00000101109_STK4	20-45078229	Female	1
ENSG00000101109_STK4	20-45078229	Male	1
ENSG00000101109_STK4	20-45078299	Female	1
ENSG00000101109_STK4	20-45078306	Female	1
ENSG00000101109_STK4	20-45078309	Female	1
ENSG00000101109_STK4	20-45079068	Male	1
ENSG00000101109_STK4	20-45079118	Female	1
ENSG00000101109_STK4	20-45079201	Female	1
ENSG00000101236_RNF24	20-3928672	Male	1
ENSG00000101294_HM13	20-31547752	Male	1
ENSG00000101294_HM13	20-31547755	Male	1
ENSG00000101294_HM13	20-31547827	Male	1
ENSG00000101335_MYL9	20-36545675	Male	1
ENSG00000101335_MYL9	20-36545782	Female	1
ENSG00000101335_MYL9	20-36546639	Female	1
ENSG00000101335_MYL9	20-36546739	Female	1
ENSG00000101335_MYL9	20-36546784	Male	1
ENSG00000101335_MYL9	20-36547360	Female	1
ENSG00000101440_ASIP	20-34246151	Male	1
ENSG00000101473_ACOT8	20-45848148	Female	1
ENSG00000101695_RNF125	18-32068979	Female	1
ENSG00000101898_MCTS2	20-31547752	Male	1
ENSG00000101898_MCTS2	20-31547755	Male	1
ENSG00000101898_MCTS2	20-31547827	Male	1
ENSG00000101966_XIAP	X-123912452	Female	1
ENSG00000101966_XIAP	X-123912749	Male	1
ENSG00000102158_MAGT1	X-77828331	Male	1
ENSG00000102317_RBM3	X-48578374	Female	1
ENSG00000102317_RBM3	X-48580461	Male	1
ENSG00000102755_FLT1	13-28368732	Female	1
ENSG00000102755_FLT1	13-28368802	Female	1
ENSG00000102755_FLT1	13-28369266	Male	1
ENSG00000102755_FLT1	13-28369353	Female	1
ENSG00000102755_FLT1	13-28369362	Female	1
ENSG00000102755_FLT1	13-28369442	Male	1
ENSG00000102755_FLT1	13-28369489	Male	1
ENSG00000102901_CENPT	16-67844874	Female	1
ENSG00000102910_LONP2	16-48353290	Female	1
ENSG00000102910_LONP2	16-48353296	Male	1
ENSG00000102910_LONP2	16-48353443	Male	1
ENSG00000102910_LONP2	16-48354471	Male	1
ENSG00000102910_LONP2	16-48354483	Female	1
ENSG00000102910_LONP2	16-48354483	Male	1
ENSG00000103199_ZNF500	16-4750617	Male	1
ENSG00000103319_EEF2K	16-22285539	Male	1
ENSG00000103365_GGA2	16-23465260	Male	1
ENSG00000103496_STX4	16-31040857	Female	1
ENSG00000103496_STX4	16-31040913	Male	1
ENSG00000103496_STX4	16-31041744	Male	1
ENSG00000103510_KAT8	16-31122918	Male	1
ENSG00000103510_KAT8	16-31123108	Male	1
ENSG00000103510_KAT8	16-31123310	Male	1
ENSG00000103510_KAT8	16-31123342	Female	1
ENSG00000103510_KAT8	16-31123343	Female	1
ENSG00000103510_KAT8	16-31123383	Female	1
ENSG00000103510_KAT8	16-31123786	Female	1
ENSG00000103510_KAT8	16-31123786	Male	1
ENSG00000104415_CCN4	8-133224739	Female	1
ENSG00000104529_EEF1D	8-143595343	Male	1
ENSG00000104687_GSR	8-30678463	Male	1
ENSG00000104687_GSR	8-30678561	Female	1
ENSG00000104687_GSR	8-30679027	Female	1
ENSG00000104687_GSR	8-30679089	Female	1
ENSG00000104738_MCM4	8-47977549	Female	1
ENSG00000104738_MCM4	8-47977549	Male	1
ENSG00000104738_MCM4	8-47977687	Female	1
ENSG00000104872_PIH1D1	19-49451759	Female	1
ENSG00000104881_PPP1R13L	19-45393185	Female	1
ENSG00000104881_PPP1R13L	19-45394256	Male	1
ENSG00000104881_PPP1R13L	19-45394417	Male	1
ENSG00000104881_PPP1R13L	19-45394581	Male	1
ENSG00000104881_PPP1R13L	19-45394745	Female	1
ENSG00000104881_PPP1R13L	19-45394952	Female	1
ENSG00000104881_PPP1R13L	19-45394961	Female	1
ENSG00000104881_PPP1R13L	19-45394988	Female	1
ENSG00000104957_YJU2B	19-13759540	Female	1
ENSG00000104957_YJU2B	19-13759677	Female	1
ENSG00000105372_RPS19	19-41871486	Female	1
ENSG00000105372_RPS19	19-41871534	Male	1
ENSG00000105372_RPS19	19-41871544	Male	1
ENSG00000105372_RPS19	19-41871556	Male	1
ENSG00000105372_RPS19	19-41871559	Female	1
ENSG00000105372_RPS19	19-41871559	Male	1
ENSG00000105372_RPS19	19-41872642	Male	1
ENSG00000105372_RPS19	19-41872774	Male	1
ENSG00000105372_RPS19	19-41872816	Male	1
ENSG00000105397_TYK2	19-10352196	Female	1
ENSG00000105397_TYK2	19-10352210	Male	1
ENSG00000105492_SIGLEC6	19-51518405	Male	1
ENSG00000105492_SIGLEC6	19-51518416	Male	1
ENSG00000105492_SIGLEC6	19-51518505	Female	1
ENSG00000105492_SIGLEC6	19-51518528	Male	1
ENSG00000105492_SIGLEC6	19-51518543	Male	1
ENSG00000105492_SIGLEC6	19-51518544	Male	1
ENSG00000105492_SIGLEC6	19-51518613	Male	1
ENSG00000105492_SIGLEC6	19-51519137	Male	1
ENSG00000105700_KXD1	19-18561466	Female	1
ENSG00000105968_H2AZ2	7-44832820	Female	1
ENSG00000105968_H2AZ2	7-44832820	Male	1
ENSG00000105968_H2AZ2	7-44832874	Male	1
ENSG00000105968_H2AZ2	7-44832881	Female	1
ENSG00000105968_H2AZ2	7-44832906	Male	1
ENSG00000105968_H2AZ2	7-44833329	Female	1
ENSG00000105968_H2AZ2	7-44833499	Male	1
ENSG00000105968_H2AZ2	7-44833507	Male	1
ENSG00000106546_AHR	7-17345106	Male	1
ENSG00000106546_AHR	7-17345194	Male	1
ENSG00000106615_RHEB	7-151503389	Female	1
ENSG00000107779_BMPR1A	10-86926319	Female	1
ENSG00000107816_LZTS2	10-101005028	Male	1
ENSG00000107862_GBF1	10-102362665	Male	1
ENSG00000108405_P2RX1	17-3900038	Male	1
ENSG00000108509_CAMTA2	17-4985486	Male	1
ENSG00000108559_NUP88	17-5382859	Female	1
ENSG00000108666_C17orf75	17-32329129	Female	1
ENSG00000109046_WSB1	17-27297691	Female	1
ENSG00000109046_WSB1	17-27297691	Male	1
ENSG00000109381_ELF2	4-139046593	Male	1
ENSG00000109381_ELF2	4-139046849	Male	1
ENSG00000109381_ELF2	4-139047379	Female	1
ENSG00000109381_ELF2	4-139047402	Male	1
ENSG00000110063_DCPS	11-126346700	Female	1
ENSG00000110090_CPT1A	11-68755966	Male	1
ENSG00000110090_CPT1A	11-68756000	Male	1
ENSG00000110090_CPT1A	11-68756036	Male	1
ENSG00000110090_CPT1A	11-68756066	Female	1
ENSG00000110090_CPT1A	11-68756066	Male	1
ENSG00000110696_C11orf58	11-16756344	Female	1
ENSG00000110696_C11orf58	11-16756695	Male	1
ENSG00000111231_GPN3	12-110461136	Female	1
ENSG00000111237_VPS29	12-110497661	Male	1
ENSG00000111237_VPS29	12-110498247	Male	1
ENSG00000111358_GTF2H3	12-123661548	Male	1
ENSG00000111450_STX2	12-130802380	Male	1
ENSG00000111450_STX2	12-130802552	Male	1
ENSG00000113569_NUP155	5-37290391	Female	1
ENSG00000113569_NUP155	5-37291457	Male	1
ENSG00000113621_TXNDC15	5-134900439	Male	1
ENSG00000113621_TXNDC15	5-134900905	Male	1
ENSG00000113621_TXNDC15	5-134900927	Female	1
ENSG00000113621_TXNDC15	5-134901040	Male	1
ENSG00000113621_TXNDC15	5-134901050	Male	1
ENSG00000114054_PCCB	3-136331561	Female	1
ENSG00000114054_PCCB	3-136331946	Female	1
ENSG00000114126_TFDP2	3-141945212	Female	1
ENSG00000114126_TFDP2	3-141945268	Female	1
ENSG00000114126_TFDP2	3-141946916	Male	1
ENSG00000114126_TFDP2	3-141948915	Male	1
ENSG00000114126_TFDP2	3-141949989	Male	1
ENSG00000114302_PRKAR2A	3-48750251	Female	1
ENSG00000114302_PRKAR2A	3-48750251	Male	1
ENSG00000114316_USP4	3-49317157	Female	1
ENSG00000114316_USP4	3-49317234	Female	1
ENSG00000114316_USP4	3-49322717	Female	1
ENSG00000114450_GNB4	3-179397847	Female	1
ENSG00000114450_GNB4	3-179398001	Female	1
ENSG00000114450_GNB4	3-179398270	Male	1
ENSG00000114850_SSR3	3-156540349	Female	1
ENSG00000114850_SSR3	3-156541528	Male	1
ENSG00000114850_SSR3	3-156541581	Female	1
ENSG00000115084_SLC35F5	2-113707620	Female	1
ENSG00000115084_SLC35F5	2-113707622	Male	1
ENSG00000115084_SLC35F5	2-113707632	Male	1
ENSG00000115084_SLC35F5	2-113707656	Female	1
ENSG00000115084_SLC35F5	2-113708461	Male	1
ENSG00000115084_SLC35F5	2-113708539	Male	1
ENSG00000115084_SLC35F5	2-113708698	Female	1
ENSG00000115084_SLC35F5	2-113709923	Male	1
ENSG00000115084_SLC35F5	2-113710048	Male	1
ENSG00000115084_SLC35F5	2-113710053	Male	1
ENSG00000115084_SLC35F5	2-113710654	Female	1
ENSG00000115084_SLC35F5	2-113712552	Female	1
ENSG00000115266_APC2	19-1458752	Male	1
ENSG00000115414_FN1	2-215371785	Male	1
ENSG00000115468_EFHD1	2-232661636	Male	1
ENSG00000115486_GGCX	2-85546253	Male	1
ENSG00000115486_GGCX	2-85546371	Male	1
ENSG00000115486_GGCX	2-85546588	Female	1
ENSG00000115977_AAK1	2-69463445	Female	1
ENSG00000116183_PAPPA2	1-176616473	Female	1
ENSG00000116198_CEP104	1-3813741	Female	1
ENSG00000116199_FAM20B	1-179073347	Male	1
ENSG00000116199_FAM20B	1-179073377	Male	1
ENSG00000116199_FAM20B	1-179073415	Male	1
ENSG00000116199_FAM20B	1-179073416	Female	1
ENSG00000116199_FAM20B	1-179073416	Male	1
ENSG00000116199_FAM20B	1-179073445	Female	1
ENSG00000116199_FAM20B	1-179073445	Male	1
ENSG00000116199_FAM20B	1-179073455	Male	1
ENSG00000116199_FAM20B	1-179074965	Male	1
ENSG00000116199_FAM20B	1-179075046	Male	1
ENSG00000116199_FAM20B	1-179075107	Male	1
ENSG00000116237_ICMT	1-6222385	Male	1
ENSG00000116237_ICMT	1-6223245	Male	1
ENSG00000116580_GON4L	1-155750833	Male	1
ENSG00000116580_GON4L	1-155750864	Male	1
ENSG00000116580_GON4L	1-155751399	Male	1
ENSG00000116580_GON4L	1-155751407	Male	1
ENSG00000116729_WLS	1-68162563	Female	1
ENSG00000117242_PINK1-AS	1-20648008	Female	1
ENSG00000117242_PINK1-AS	1-20649625	Female	1
ENSG00000117335_CD46	1-207768991	Male	1
ENSG00000117335_CD46	1-207769043	Female	1
ENSG00000117335_CD46	1-207769183	Male	1
ENSG00000117335_CD46	1-207769199	Female	1
ENSG00000117335_CD46	1-207769818	Female	1
ENSG00000117335_CD46	1-207769837	Female	1
ENSG00000117335_CD46	1-207769891	Male	1
ENSG00000117335_CD46	1-207769905	Male	1
ENSG00000117335_CD46	1-207769911	Male	1
ENSG00000117620_SLC35A3	1-100023951	Male	1
ENSG00000117899_MESD	15-80975934	Female	1
ENSG00000118197_DDX59	1-200648326	Male	1
ENSG00000118579_MED28	4-17627754	Male	1
ENSG00000118579_MED28	4-17629112	Male	1
ENSG00000119004_CYP20A1	2-203303575	Female	1
ENSG00000119004_CYP20A1	2-203304771	Female	1
ENSG00000119004_CYP20A1	2-203305318	Male	1
ENSG00000119004_CYP20A1	2-203305438	Female	1
ENSG00000119392_GLE1	9-128517222	Male	1
ENSG00000119535_CSF3R	1-36477870	Male	1
ENSG00000119616_FCF1	14-74735670	Male	1
ENSG00000119616_FCF1	14-74735709	Male	1
ENSG00000119616_FCF1	14-74736031	Male	1
ENSG00000119616_FCF1	14-74736291	Male	1
ENSG00000119616_FCF1	14-74736301	Female	1
ENSG00000119616_FCF1	14-74736301	Male	1
ENSG00000119820_YIPF4	2-32308592	Female	1
ENSG00000119820_YIPF4	2-32310623	Female	1
ENSG00000119820_YIPF4	2-32310678	Female	1
ENSG00000119899_SLC17A5	6-73594290	Male	1
ENSG00000120253_NUP43	6-149724862	Male	1
ENSG00000120253_NUP43	6-149725279	Male	1
ENSG00000120256_LRP11	6-149820961	Male	1
ENSG00000120256_LRP11	6-149821134	Male	1
ENSG00000120256_LRP11	6-149821202	Female	1
ENSG00000120256_LRP11	6-149822258	Female	1
ENSG00000120256_LRP11	6-149822299	Male	1
ENSG00000120256_LRP11	6-149822318	Male	1
ENSG00000120256_LRP11	6-149824694	Female	1
ENSG00000120256_LRP11	6-149825758	Female	1
ENSG00000120256_LRP11	6-149825813	Male	1
ENSG00000120256_LRP11	6-149825900	Male	1
ENSG00000120594_PLXDC2	10-20286764	Male	1
ENSG00000120594_PLXDC2	10-20286805	Female	1
ENSG00000120594_PLXDC2	10-20286825	Male	1
ENSG00000120594_PLXDC2	10-20286842	Female	1
ENSG00000120784_ZFP30	19-37632978	Female	1
ENSG00000120948_TARDBP	1-11020869	Male	1
ENSG00000120948_TARDBP	1-11021885	Male	1
ENSG00000121289_CEP89	19-32970399	Male	1
ENSG00000122705_CLTA	9-36215080	Male	1
ENSG00000122705_CLTA	9-36215081	Female	1
ENSG00000122705_CLTA	9-36215243	Female	1
ENSG00000122705_CLTA	9-36215301	Male	1
ENSG00000122705_CLTA	9-36216702	Male	1
ENSG00000122912_SLC25A16	10-68478918	Male	1
ENSG00000122912_SLC25A16	10-68479561	Female	1
ENSG00000122912_SLC25A16	10-68481969	Male	1
ENSG00000122912_SLC25A16	10-68518652	Female	1
ENSG00000123130_ACOT9	X-23701907	Male	1
ENSG00000123130_ACOT9	X-23703415	Male	1
ENSG00000123130_ACOT9	X-23703455	Male	1
ENSG00000123144_TRIR	19-12732037	Male	1
ENSG00000123144_TRIR	19-12732662	Female	1
ENSG00000123144_TRIR	19-12732692	Male	1
ENSG00000123154_WDR83	19-12671434	Female	1
ENSG00000123154_WDR83	19-12671434	Male	1
ENSG00000123154_WDR83	19-12671901	Female	1
ENSG00000123159_GIPC1	19-14489209	Male	1
ENSG00000123159_GIPC1	19-14489425	Male	1
ENSG00000123178_SPRYD7	13-49913178	Male	1
ENSG00000123178_SPRYD7	13-49913254	Male	1
ENSG00000123178_SPRYD7	13-49913257	Female	1
ENSG00000123178_SPRYD7	13-49913337	Male	1
ENSG00000123178_SPRYD7	13-49913595	Male	1
ENSG00000123178_SPRYD7	13-49913651	Male	1
ENSG00000123178_SPRYD7	13-49913687	Male	1
ENSG00000123178_SPRYD7	13-49913805	Female	1
ENSG00000123505_AMD1	6-110897569	Male	1
ENSG00000124104_SNX21	20-45837902	Female	1
ENSG00000124104_SNX21	20-45838348	Male	1
ENSG00000124104_SNX21	20-45838643	Female	1
ENSG00000124208_PEDS1-UBE2V1	20-50118691	Male	1
ENSG00000124208_PEDS1-UBE2V1	20-50118716	Male	1
ENSG00000124208_PEDS1-UBE2V1	20-50118731	Female	1
ENSG00000124226_RNF114	20-49943935	Female	1
ENSG00000124440_HIF3A	19-46313176	Female	1
ENSG00000124440_HIF3A	19-46313360	Male	1
ENSG00000124440_HIF3A	19-46316601	Male	1
ENSG00000124440_HIF3A	19-46317164	Male	1
ENSG00000124440_HIF3A	19-46336919	Male	1
ENSG00000124541_RRP36	6-43029674	Male	1
ENSG00000124541_RRP36	6-43029679	Male	1
ENSG00000124541_RRP36	6-43029689	Female	1
ENSG00000124541_RRP36	6-43029800	Female	1
ENSG00000124541_RRP36	6-43029855	Male	1
ENSG00000124541_RRP36	6-43030496	Male	1
ENSG00000124541_RRP36	6-43030761	Female	1
ENSG00000125375_DMAC2L	14-50326005	Male	1
ENSG00000125375_DMAC2L	14-50327645	Female	1
ENSG00000125375_DMAC2L	14-50327645	Male	1
ENSG00000125733_TRIP10	19-6747243	Female	1
ENSG00000125741_OPA3	19-45551099	Male	1
ENSG00000125755_SYMPK	19-45860342	Female	1
ENSG00000125779_PANK2	20-3928672	Male	1
ENSG00000125912_NCLN	19-3194193	Female	1
ENSG00000125912_NCLN	19-3194263	Female	1
ENSG00000126005_MMP24OS	20-35218054	Male	1
ENSG00000126067_PSMB2	1-35600107	Male	1
ENSG00000126067_PSMB2	1-35602237	Male	1
ENSG00000126067_PSMB2	1-35602324	Male	1
ENSG00000126067_PSMB2	1-35602594	Male	1
ENSG00000126067_PSMB2	1-35602630	Female	1
ENSG00000126067_PSMB2	1-35602630	Male	1
ENSG00000126067_PSMB2	1-35602694	Male	1
ENSG00000126067_PSMB2	1-35602724	Male	1
ENSG00000126214_KLC1	14-103681524	Male	1
ENSG00000126214_KLC1	14-103681576	Male	1
ENSG00000126214_KLC1	14-103682255	Male	1
ENSG00000126214_KLC1	14-103682430	Male	1
ENSG00000126214_KLC1	14-103682538	Male	1
ENSG00000126214_KLC1	14-103682551	Female	1
ENSG00000126214_KLC1	14-103682554	Female	1
ENSG00000126214_KLC1	14-103682554	Male	1
ENSG00000126214_KLC1	14-103682604	Male	1
ENSG00000126602_TRAP1	16-3660826	Female	1
ENSG00000126602_TRAP1	16-3678734	Male	1
ENSG00000126775_ATG14	14-55367498	Male	1
ENSG00000126775_ATG14	14-55367600	Male	1
ENSG00000126775_ATG14	14-55367643	Male	1
ENSG00000126775_ATG14	14-55368248	Male	1
ENSG00000126775_ATG14	14-55368402	Male	1
ENSG00000126775_ATG14	14-55368515	Male	1
ENSG00000127054_INTS11	1-1316230	Male	1
ENSG00000127054_INTS11	1-1316461	Female	1
ENSG00000127054_INTS11	1-1316464	Female	1
ENSG00000127054_INTS11	1-1316464	Male	1
ENSG00000127054_INTS11	1-1316467	Female	1
ENSG00000127054_INTS11	1-1317164	Male	1
ENSG00000127054_INTS11	1-1317933	Female	1
ENSG00000127054_INTS11	1-1317934	Female	1
ENSG00000127054_INTS11	1-1317934	Male	1
ENSG00000127054_INTS11	1-1317981	Female	1
ENSG00000127054_INTS11	1-1317996	Female	1
ENSG00000127054_INTS11	1-1318006	Female	1
ENSG00000127054_INTS11	1-1318006	Male	1
ENSG00000127054_INTS11	1-1318636	Female	1
ENSG00000127463_EMC1	1-19215816	Male	1
ENSG00000127463_EMC1	1-19215964	Male	1
ENSG00000127463_EMC1	1-19215969	Male	1
ENSG00000127463_EMC1	1-19216127	Male	1
ENSG00000127463_EMC1	1-19216137	Female	1
ENSG00000127472_PLA2G5	1-20088237	Male	1
ENSG00000127483_HP1BP3	1-20774876	Male	1
ENSG00000127511_SIN3B	19-16856711	Male	1
ENSG00000127526_SLC35E1	19-16550468	Male	1
ENSG00000127526_SLC35E1	19-16550474	Male	1
ENSG00000127526_SLC35E1	19-16550480	Male	1
ENSG00000127526_SLC35E1	19-16550486	Male	1
ENSG00000127526_SLC35E1	19-16550487	Female	1
ENSG00000127526_SLC35E1	19-16550548	Male	1
ENSG00000127526_SLC35E1	19-16550568	Male	1
ENSG00000127526_SLC35E1	19-16550623	Male	1
ENSG00000127804_METTL16	17-2417202	Male	1
ENSG00000127804_METTL16	17-2417357	Male	1
ENSG00000127804_METTL16	17-2418312	Male	1
ENSG00000127914_AKAP9	7-92092700	Female	1
ENSG00000128000_ZNF780B	19-40031359	Female	1
ENSG00000128050_PAICS	4-56460149	Male	1
ENSG00000128050_PAICS	4-56460709	Male	1
ENSG00000128050_PAICS	4-56460851	Male	1
ENSG00000128346_C22orf23	22-37944643	Male	1
ENSG00000128346_C22orf23	22-37944672	Male	1
ENSG00000128346_C22orf23	22-37944743	Male	1
ENSG00000128346_C22orf23	22-37945852	Male	1
ENSG00000128346_C22orf23	22-37945858	Male	1
ENSG00000128346_C22orf23	22-37946813	Female	1
ENSG00000128346_C22orf23	22-37947883	Female	1
ENSG00000128346_C22orf23	22-37947896	Male	1
ENSG00000128346_C22orf23	22-37947984	Male	1
ENSG00000128346_C22orf23	22-37948064	Male	1
ENSG00000128346_C22orf23	22-37948067	Male	1
ENSG00000128346_C22orf23	22-37948223	Female	1
ENSG00000128487_SPECC1	17-20317595	Female	1
ENSG00000129128_SPCS3	4-176331176	Male	1
ENSG00000129128_SPCS3	4-176331637	Female	1
ENSG00000129250_KIF1C	17-5027229	Female	1
ENSG00000129250_KIF1C	17-5027797	Male	1
ENSG00000129250_KIF1C	17-5027822	Male	1
ENSG00000129472_RAB2B	14-21460419	Female	1
ENSG00000129472_RAB2B	14-21460473	Male	1
ENSG00000129472_RAB2B	14-21460522	Male	1
ENSG00000129472_RAB2B	14-21460751	Male	1
ENSG00000129472_RAB2B	14-21460839	Male	1
ENSG00000129474_AJUBA	14-22972939	Male	1
ENSG00000129474_AJUBA	14-22972941	Male	1
ENSG00000129566_TEP1	14-20367107	Male	1
ENSG00000129566_TEP1	14-20367119	Female	1
ENSG00000129566_TEP1	14-20367181	Male	1
ENSG00000129566_TEP1	14-20367747	Male	1
ENSG00000129566_TEP1	14-20367769	Male	1
ENSG00000129625_REEP5	5-112891790	Male	1
ENSG00000130119_GNL3L	X-54560763	Male	1
ENSG00000130119_GNL3L	X-54560917	Female	1
ENSG00000130119_GNL3L	X-54560919	Female	1
ENSG00000130119_GNL3L	X-54562243	Female	1
ENSG00000130119_GNL3L	X-54562308	Female	1
ENSG00000130119_GNL3L	X-54562673	Male	1
ENSG00000130119_GNL3L	X-54562686	Male	1
ENSG00000130119_GNL3L	X-54562750	Male	1
ENSG00000130119_GNL3L	X-54563515	Female	1
ENSG00000130119_GNL3L	X-54563582	Male	1
ENSG00000130119_GNL3L	X-54563593	Male	1
ENSG00000130119_GNL3L	X-54564507	Male	1
ENSG00000130119_GNL3L	X-54564508	Female	1
ENSG00000130119_GNL3L	X-54564508	Male	1
ENSG00000130119_GNL3L	X-54564834	Male	1
ENSG00000130175_PRKCSH	19-11450218	Male	1
ENSG00000130176_CNN1	19-11542342	Male	1
ENSG00000130176_CNN1	19-11542393	Male	1
ENSG00000130176_CNN1	19-11542776	Male	1
ENSG00000130177_CDC16	13-114259018	Male	1
ENSG00000130332_LSM7	19-2327421	Female	1
ENSG00000130363_RSPH3	6-158974979	Female	1
ENSG00000130517_PGPEP1	19-18365515	Male	1
ENSG00000130517_PGPEP1	19-18368075	Female	1
ENSG00000130517_PGPEP1	19-18368360	Female	1
ENSG00000130713_EXOSC2	9-130704410	Male	1
ENSG00000130772_MED18	1-28335812	Male	1
ENSG00000130822_PNCK	X-153677054	Male	1
ENSG00000130822_PNCK	X-153677104	Female	1
ENSG00000131149_GSE1	16-85672958	Female	1
ENSG00000131381_RBSN	3-15072386	Male	1
ENSG00000131381_RBSN	3-15072774	Female	1
ENSG00000131381_RBSN	3-15072786	Male	1
ENSG00000131381_RBSN	3-15072811	Female	1
ENSG00000131981_LGALS3	14-55135779	Male	1
ENSG00000132199_ENOSF1	18-691565	Female	1
ENSG00000132470_ITGB4	17-75745299	Female	1
ENSG00000132676_DAP3	1-155733885	Male	1
ENSG00000132698_RAB25	1-156067852	Female	1
ENSG00000132698_RAB25	1-156067895	Female	1
ENSG00000132780_NASP	1-45610795	Male	1
ENSG00000132780_NASP	1-45610857	Female	1
ENSG00000132780_NASP	1-45610871	Male	1
ENSG00000133028_SCO1	17-10673142	Male	1
ENSG00000133028_SCO1	17-10674318	Male	1
ENSG00000133114_GPALPP1	13-45031106	Male	1
ENSG00000133275_CSNK1G2	19-1980473	Male	1
ENSG00000133983_COX16	14-70369354	Male	1
ENSG00000134086_VHL	3-10151132	Male	1
ENSG00000134086_VHL	3-10152112	Female	1
ENSG00000134086_VHL	3-10152113	Male	1
ENSG00000134086_VHL	3-10152158	Female	1
ENSG00000134086_VHL	3-10152632	Male	1
ENSG00000134152_KATNBL1	15-34142900	Male	1
ENSG00000134152_KATNBL1	15-34143731	Male	1
ENSG00000134152_KATNBL1	15-34144809	Male	1
ENSG00000134245_WNT2B	1-112494422	Female	1
ENSG00000134297_PLEKHA8P1	12-45173626	Female	1
ENSG00000134297_PLEKHA8P1	12-45174516	Male	1
ENSG00000134297_PLEKHA8P1	12-45174536	Male	1
ENSG00000134297_PLEKHA8P1	12-45174662	Female	1
ENSG00000134297_PLEKHA8P1	12-45174707	Male	1
ENSG00000134490_TMEM241	18-23296358	Male	1
ENSG00000135074_ADAM19	5-157478559	Female	1
ENSG00000135164_DMTF1	7-87187352	Female	1
ENSG00000135245_HILPDA	7-128457726	Male	1
ENSG00000135678_CPM	12-68851524	Male	1
ENSG00000135678_CPM	12-68852766	Male	1
ENSG00000135842_NIBAN1	1-184791991	Male	1
ENSG00000135842_NIBAN1	1-184792186	Male	1
ENSG00000135917_SLC19A3	2-227686085	Male	1
ENSG00000135917_SLC19A3	2-227686089	Male	1
ENSG00000136068_FLNB	3-58140709	Male	1
ENSG00000136068_FLNB	3-58140879	Male	1
ENSG00000136068_FLNB	3-58141132	Male	1
ENSG00000136068_FLNB	3-58141162	Male	1
ENSG00000136699_SMPD4	2-130158449	Male	1
ENSG00000136699_SMPD4	2-130159035	Female	1
ENSG00000136699_SMPD4	2-130159454	Female	1
ENSG00000136699_SMPD4	2-130159594	Male	1
ENSG00000136731_UGGT1	2-128191581	Male	1
ENSG00000136731_UGGT1	2-128192917	Male	1
ENSG00000136731_UGGT1	2-128192941	Male	1
ENSG00000136731_UGGT1	2-128193062	Female	1
ENSG00000136731_UGGT1	2-128193345	Female	1
ENSG00000136731_UGGT1	2-128193346	Male	1
ENSG00000136731_UGGT1	2-128193355	Female	1
ENSG00000136731_UGGT1	2-128193549	Male	1
ENSG00000136731_UGGT1	2-128194210	Female	1
ENSG00000136731_UGGT1	2-128194506	Male	1
ENSG00000137054_POLR1E	9-37503395	Male	1
ENSG00000137413_TAF8	6-42079688	Male	1
ENSG00000137460_FHDC1	4-152977158	Female	1
ENSG00000137460_FHDC1	4-152977560	Female	1
ENSG00000137713_PPP2R1B	11-111728911	Male	1
ENSG00000137814_HAUS2	15-42569419	Female	1
ENSG00000137869_CYP19A1	15-51273968	Male	1
ENSG00000137944_KYAT3	1-88982873	Female	1
ENSG00000138594_LOC112268148	15-51913043	Male	1
ENSG00000138594_TMOD3	15-51913043	Male	1
ENSG00000138594_LOC112268148	15-51913099	Male	1
ENSG00000138594_TMOD3	15-51913099	Male	1
ENSG00000138594_LOC112268148	15-51913158	Male	1
ENSG00000138594_TMOD3	15-51913158	Male	1
ENSG00000138594_LOC112268148	15-51913234	Male	1
ENSG00000138594_TMOD3	15-51913234	Male	1
ENSG00000138594_LOC112268148	15-51913892	Male	1
ENSG00000138594_TMOD3	15-51913892	Male	1
ENSG00000138594_LOC112268148	15-51913957	Female	1
ENSG00000138594_TMOD3	15-51913957	Female	1
ENSG00000138594_LOC112268148	15-51914493	Male	1
ENSG00000138594_TMOD3	15-51914493	Male	1
ENSG00000138594_LOC112268148	15-51914973	Female	1
ENSG00000138594_TMOD3	15-51914973	Female	1
ENSG00000138600_SPPL2A	15-50703428	Female	1
ENSG00000138600_SPPL2A	15-50703435	Female	1
ENSG00000138600_SPPL2A	15-50703468	Male	1
ENSG00000138600_SPPL2A	15-50703491	Female	1
ENSG00000138600_SPPL2A	15-50703527	Male	1
ENSG00000138600_SPPL2A	15-50703590	Female	1
ENSG00000138600_SPPL2A	15-50704080	Female	1
ENSG00000138600_SPPL2A	15-50704086	Female	1
ENSG00000138600_SPPL2A	15-50704098	Female	1
ENSG00000138600_SPPL2A	15-50704108	Female	1
ENSG00000138600_SPPL2A	15-50704132	Female	1
ENSG00000138600_SPPL2A	15-50704132	Male	1
ENSG00000138600_SPPL2A	15-50704180	Male	1
ENSG00000138600_SPPL2A	15-50704298	Female	1
ENSG00000138600_SPPL2A	15-50704303	Male	1
ENSG00000138600_SPPL2A	15-50705258	Female	1
ENSG00000138600_SPPL2A	15-50707224	Female	1
ENSG00000138600_SPPL2A	15-50707251	Female	1
ENSG00000138744_NAAA	4-75917586	Female	1
ENSG00000139291_TMEM19	12-71702538	Male	1
ENSG00000139329_LUM	12-91106984	Male	1
ENSG00000139433_GLTP	12-109851603	Female	1
ENSG00000139631_CSAD	12-53174628	Male	1
ENSG00000139631_CSAD	12-53174631	Female	1
ENSG00000139631_CSAD	12-53176619	Male	1
ENSG00000139631_CSAD	12-53177735	Male	1
ENSG00000139631_CSAD	12-53177802	Female	1
ENSG00000139631_CSAD	12-53177828	Male	1
ENSG00000139631_CSAD	12-53177841	Male	1
ENSG00000139631_CSAD	12-53178703	Female	1
ENSG00000139631_CSAD	12-53178703	Male	1
ENSG00000139631_CSAD	12-53179056	Female	1
ENSG00000139631_CSAD	12-53179126	Male	1
ENSG00000140092_FBLN5	14-91871653	Male	1
ENSG00000140105_WARS1	14-100366660	Female	1
ENSG00000140105_WARS1	14-100366682	Female	1
ENSG00000140105_WARS1	14-100366778	Male	1
ENSG00000140199_SLC12A6	15-34231108	Male	1
ENSG00000140199_SLC12A6	15-34231279	Female	1
ENSG00000140199_SLC12A6	15-34231754	Female	1
ENSG00000140374_ETFA	15-76230608	Male	1
ENSG00000140398_NEIL1	15-75352884	Male	1
ENSG00000140398_NEIL1	15-75353060	Male	1
ENSG00000140398_NEIL1	15-75353280	Female	1
ENSG00000140398_NEIL1	15-75353280	Male	1
ENSG00000140497_SCAMP2	15-74847154	Male	1
ENSG00000140526_ABHD2	15-89201430	Male	1
ENSG00000140526_ABHD2	15-89201452	Male	1
ENSG00000140526_ABHD2	15-89201741	Male	1
ENSG00000140526_ABHD2	15-89201780	Male	1
ENSG00000140526_ABHD2	15-89201788	Male	1
ENSG00000140749_IGSF6	16-21639981	Female	1
ENSG00000140749_IGSF6	16-21640001	Female	1
ENSG00000140749_IGSF6	16-21640001	Male	1
ENSG00000140749_IGSF6	16-21640015	Female	1
ENSG00000140749_IGSF6	16-21640015	Male	1
ENSG00000140749_IGSF6	16-21640211	Female	1
ENSG00000140749_IGSF6	16-21640219	Female	1
ENSG00000140749_IGSF6	16-21640506	Female	1
ENSG00000140749_IGSF6	16-21640710	Female	1
ENSG00000140750_ARHGAP17	16-24940500	Male	1
ENSG00000140859_KIFC3	16-57781133	Female	1
ENSG00000141568_FOXK2	17-82577305	Male	1
ENSG00000141568_FOXK2	17-82626021	Male	1
ENSG00000141568_FOXK2	17-82628060	Male	1
ENSG00000141569_TRIM65	17-75890131	Male	1
ENSG00000141569_TRIM65	17-75890171	Male	1
ENSG00000141580_WDR45B	17-82626021	Male	1
ENSG00000141580_WDR45B	17-82628060	Male	1
ENSG00000142166_IFNAR1	21-33357628	Male	1
ENSG00000142166_IFNAR1	21-33357653	Male	1
ENSG00000142166_IFNAR1	21-33357789	Male	1
ENSG00000142166_IFNAR1	21-33357790	Male	1
ENSG00000142188_TMEM50B	21-33433106	Female	1
ENSG00000142751_GPN2	1-26877933	Female	1
ENSG00000142751_GPN2	1-26878733	Male	1
ENSG00000142765_SYTL1	1-27344323	Male	1
ENSG00000142864_SERBP1	1-67409006	Male	1
ENSG00000142864_SERBP1	1-67409176	Female	1
ENSG00000143398_PIP5K1A	1-151201414	Female	1
ENSG00000143458_GABPB2	1-151124279	Female	1
ENSG00000143742_SRP9	1-225787046	Male	1
ENSG00000143742_SRP9	1-225788288	Female	1
ENSG00000143742_SRP9	1-225788292	Female	1
ENSG00000143742_SRP9	1-225788349	Female	1
ENSG00000143742_SRP9	1-225788541	Male	1
ENSG00000143742_SRP9	1-225788545	Male	1
ENSG00000143742_SRP9	1-225788563	Female	1
ENSG00000144231_POLR2D	2-127843890	Male	1
ENSG00000144320_LNPK	2-175924785	Male	1
ENSG00000144320_LNPK	2-175926454	Male	1
ENSG00000144791_LIMD1	3-45680563	Male	1
ENSG00000144791_LIMD1	3-45680795	Female	1
ENSG00000144791_LIMD1	3-45680889	Male	1
ENSG00000144791_LIMD1	3-45680895	Male	1
ENSG00000144791_LIMD1	3-45680938	Female	1
ENSG00000144791_LIMD1	3-45680999	Male	1
ENSG00000144791_LIMD1	3-45681000	Male	1
ENSG00000145029_NICN1	3-49423494	Female	1
ENSG00000145029_NICN1	3-49423513	Female	1
ENSG00000145029_NICN1	3-49423594	Female	1
ENSG00000145029_NICN1	3-49423656	Male	1
ENSG00000145029_NICN1	3-49423887	Male	1
ENSG00000145029_NICN1	3-49423958	Female	1
ENSG00000145029_NICN1	3-49423987	Male	1
ENSG00000145029_NICN1	3-49424054	Female	1
ENSG00000145029_NICN1	3-49424070	Male	1
ENSG00000145416_MARCHF1	4-163933247	Male	1
ENSG00000145819_ARHGAP26	5-143225363	Male	1
ENSG00000145819_ARHGAP26	5-143226436	Female	1
ENSG00000146223_RPL7L1	6-42888216	Male	1
ENSG00000146576_INTS15	7-6606846	Male	1
ENSG00000146576_INTS15	7-6606898	Male	1
ENSG00000146828_SLC12A9	7-100855192	Female	1
ENSG00000146828_SLC12A9	7-100855222	Male	1
ENSG00000146828_SLC12A9	7-100855356	Female	1
ENSG00000146828_SLC12A9	7-100855356	Male	1
ENSG00000147133_TAF1	X-71420214	Female	1
ENSG00000147576_ADHFE1	8-66455725	Female	1
ENSG00000147576_ADHFE1	8-66455859	Male	1
ENSG00000147649_MTDH	8-97728672	Male	1
ENSG00000147649_MTDH	8-97729059	Female	1
ENSG00000147649_MTDH	8-97729188	Female	1
ENSG00000148090_AUH	9-91292452	Male	1
ENSG00000148153_INIP	9-112684445	Male	1
ENSG00000148153_INIP	9-112684505	Male	1
ENSG00000148153_INIP	9-112685238	Male	1
ENSG00000149182_ARFGAP2	11-47168588	Female	1
ENSG00000149182_ARFGAP2	11-47168659	Male	1
ENSG00000149311_ATM	11-108365758	Male	1
ENSG00000149311_ATM	11-108365796	Male	1
ENSG00000149639_SOGA1	20-36781401	Female	1
ENSG00000149639_SOGA1	20-36781453	Male	1
ENSG00000149639_SOGA1	20-36782112	Female	1
ENSG00000149639_SOGA1	20-36782112	Male	1
ENSG00000150455_TIRAP	11-126295135	Male	1
ENSG00000150938_CRIM1	2-36523055	Male	1
ENSG00000151176_PLBD2	12-113391109	Male	1
ENSG00000151208_DLG5	10-77815467	Female	1
ENSG00000151366_NDUFC2	11-78069071	Male	1
ENSG00000151923_TIAL1	10-119572378	Female	1
ENSG00000151923_TIAL1	10-119572450	Female	1
ENSG00000151923_TIAL1	10-119572450	Male	1
ENSG00000151923_TIAL1	10-119572457	Male	1
ENSG00000151923_TIAL1	10-119572555	Female	1
ENSG00000151923_TIAL1	10-119572588	Female	1
ENSG00000151923_TIAL1	10-119572607	Male	1
ENSG00000151923_TIAL1	10-119572676	Female	1
ENSG00000152056_AP1S3	2-223755695	Male	1
ENSG00000152104_PTPN14	1-214351153	Female	1
ENSG00000152104_PTPN14	1-214351213	Male	1
ENSG00000152104_PTPN14	1-214351233	Male	1
ENSG00000152291_TGOLN2	2-85323098	Male	1
ENSG00000152291_TGOLN2	2-85323374	Male	1
ENSG00000152433_ZNF547	19-57364808	Female	1
ENSG00000152433_ZNF547	19-57364842	Female	1
ENSG00000153037_SRP19	5-112891790	Male	1
ENSG00000153046_CDYL	6-4953263	Female	1
ENSG00000153291_SLC25A27	6-46657080	Female	1
ENSG00000154079_SDHAF4	6-70588989	Female	1
ENSG00000154079_SDHAF4	6-70589050	Male	1
ENSG00000154079_SDHAF4	6-70589265	Female	1
ENSG00000154079_SDHAF4	6-70589266	Male	1
ENSG00000154079_SDHAF4	6-70589270	Female	1
ENSG00000154122_ANKH	5-14715311	Male	1
ENSG00000154803_FLCN	17-17224711	Female	1
ENSG00000155008_APOOL	X-85090880	Female	1
ENSG00000155008_APOOL	X-85091020	Male	1
ENSG00000155034_FBXL18	7-5476999	Female	1
ENSG00000155269_GPR78	4-8564041	Male	1
ENSG00000155269_GPR78	4-8577364	Female	1
ENSG00000155393_HEATR3	16-50105226	Female	1
ENSG00000155393_HEATR3	16-50105631	Female	1
ENSG00000155393_HEATR3	16-50105833	Male	1
ENSG00000155850_SLC26A2	5-149983749	Female	1
ENSG00000155850_SLC26A2	5-149983767	Male	1
ENSG00000155858_LSM11	5-157756980	Female	1
ENSG00000155974_GRIP1	12-66892845	Male	1
ENSG00000156162_DPY19L4	8-94792288	Male	1
ENSG00000156162_DPY19L4	8-94792377	Male	1
ENSG00000156162_DPY19L4	8-94792387	Male	1
ENSG00000156162_DPY19L4	8-94792413	Male	1
ENSG00000156162_DPY19L4	8-94792431	Male	1
ENSG00000156162_DPY19L4	8-94792709	Female	1
ENSG00000156162_DPY19L4	8-94792834	Male	1
ENSG00000156482_RPL30	8-98043209	Male	1
ENSG00000156482_RPL30	8-98043405	Male	1
ENSG00000156711_MAPK13	6-36141554	Female	1
ENSG00000157500_APPL1	3-57272806	Female	1
ENSG00000157625_TAB3	X-30836660	Female	1
ENSG00000157625_TAB3	X-30836660	Male	1
ENSG00000157637_SLC38A10	17-81248096	Female	1
ENSG00000157637_SLC38A10	17-81248096	Male	1
ENSG00000157827_FMNL2	2-152390071	Female	1
ENSG00000158270_COLEC12	18-318578	Male	1
ENSG00000158270_COLEC12	18-318630	Male	1
ENSG00000158769_F11R	1-160995524	Male	1
ENSG00000158769_F11R	1-160998026	Male	1
ENSG00000158769_F11R	1-160998100	Male	1
ENSG00000158828_PINK1	1-20648008	Female	1
ENSG00000158828_PINK1	1-20649625	Female	1
ENSG00000159110_IFNAR2	21-33263899	Male	1
ENSG00000159110_IFNAR2	21-33263955	Male	1
ENSG00000159110_IFNAR2	21-33264783	Male	1
ENSG00000159128_IFNGR2	21-33433106	Female	1
ENSG00000159231_CBR3	21-36139950	Female	1
ENSG00000159708_LRRC36	16-67373605	Male	1
ENSG00000159708_LRRC36	16-67373623	Male	1
ENSG00000159708_LRRC36	16-67374524	Male	1
ENSG00000159708_LRRC36	16-67374670	Male	1
ENSG00000159708_LRRC36	16-67374894	Female	1
ENSG00000159921_GNE	9-36215080	Male	1
ENSG00000159921_GNE	9-36215081	Female	1
ENSG00000159921_GNE	9-36215243	Female	1
ENSG00000159921_GNE	9-36215301	Male	1
ENSG00000159921_GNE	9-36216702	Male	1
ENSG00000160049_DFFA	1-10457257	Male	1
ENSG00000160049_DFFA	1-10457428	Male	1
ENSG00000160049_DFFA	1-10457596	Male	1
ENSG00000160049_DFFA	1-10457935	Male	1
ENSG00000160049_DFFA	1-10457977	Male	1
ENSG00000160049_DFFA	1-10459007	Female	1
ENSG00000160049_DFFA	1-10459007	Male	1
ENSG00000160049_DFFA	1-10459855	Male	1
ENSG00000160049_DFFA	1-10460678	Male	1
ENSG00000160049_DFFA	1-10461069	Male	1
ENSG00000160049_DFFA	1-10461073	Female	1
ENSG00000160049_DFFA	1-10461105	Female	1
ENSG00000160049_DFFA	1-10461113	Male	1
ENSG00000160049_DFFA	1-10461143	Male	1
ENSG00000160194_NDUFV3	21-42908141	Female	1
ENSG00000160194_NDUFV3	21-42908141	Male	1
ENSG00000160194_NDUFV3	21-42909254	Male	1
ENSG00000160194_NDUFV3	21-42911096	Female	1
ENSG00000160194_NDUFV3	21-42911184	Male	1
ENSG00000160194_NDUFV3	21-42911511	Male	1
ENSG00000160194_NDUFV3	21-42911535	Male	1
ENSG00000160194_NDUFV3	21-42911608	Male	1
ENSG00000160209_PDXK	21-43724584	Female	1
ENSG00000160209_PDXK	21-43724595	Female	1
ENSG00000160209_PDXK	21-43725735	Female	1
ENSG00000160209_PDXK	21-43729738	Female	1
ENSG00000160209_PDXK	21-43729797	Female	1
ENSG00000160209_PDXK	21-43730828	Male	1
ENSG00000160294_MCM3AP	21-46268922	Male	1
ENSG00000160294_MCM3AP	21-46269211	Female	1
ENSG00000160294_MCM3AP	21-46269336	Male	1
ENSG00000160439_RDH13	19-55039275	Male	1
ENSG00000160439_RDH13	19-55039287	Female	1
ENSG00000160439_RDH13	19-55039287	Male	1
ENSG00000160439_RDH13	19-55040227	Male	1
ENSG00000160439_RDH13	19-55040291	Male	1
ENSG00000160439_RDH13	19-55040353	Female	1
ENSG00000160439_RDH13	19-55040363	Female	1
ENSG00000160439_RDH13	19-55040422	Female	1
ENSG00000160439_RDH13	19-55043556	Male	1
ENSG00000160439_RDH13	19-55043616	Male	1
ENSG00000160691_SHC1	1-154964693	Male	1
ENSG00000160953_PWWP3A	19-1372712	Male	1
ENSG00000161011_SQSTM1	5-179821142	Male	1
ENSG00000161091_MFSD12	19-3539995	Female	1
ENSG00000161091_MFSD12	19-3540176	Male	1
ENSG00000161091_MFSD12	19-3540318	Female	1
ENSG00000161091_MFSD12	19-3541021	Male	1
ENSG00000161533_ACOX1	17-75944794	Male	1
ENSG00000162222_TTC9C	11-62739518	Female	1
ENSG00000162222_TTC9C	11-62739891	Male	1
ENSG00000162378_ZYG11B	1-52823875	Female	1
ENSG00000162378_ZYG11B	1-52824087	Female	1
ENSG00000162378_ZYG11B	1-52825748	Male	1
ENSG00000162378_ZYG11B	1-52825753	Male	1
ENSG00000162390_ACOT11	1-54637438	Male	1
ENSG00000162390_ACOT11	1-54639071	Male	1
ENSG00000162390_ACOT11	1-54639074	Male	1
ENSG00000162408_NOL9	1-6524797	Male	1
ENSG00000162441_LZIC	1-9927412	Female	1
ENSG00000162441_LZIC	1-9927412	Male	1
ENSG00000162441_LZIC	1-9927786	Female	1
ENSG00000162441_LZIC	1-9927795	Male	1
ENSG00000162441_LZIC	1-9927799	Male	1
ENSG00000162441_LZIC	1-9927874	Male	1
ENSG00000162441_LZIC	1-9927893	Male	1
ENSG00000162441_LZIC	1-9927894	Male	1
ENSG00000162441_LZIC	1-9928190	Male	1
ENSG00000162441_LZIC	1-9928201	Male	1
ENSG00000162441_LZIC	1-9928634	Female	1
ENSG00000162441_LZIC	1-9928634	Male	1
ENSG00000162654_GBP4	1-89183686	Male	1
ENSG00000162654_GBP4	1-89183696	Male	1
ENSG00000162654_GBP4	1-89183877	Female	1
ENSG00000162813_BPNT1	1-220058010	Male	1
ENSG00000162813_BPNT1	1-220058028	Male	1
ENSG00000162813_BPNT1	1-220058629	Female	1
ENSG00000162813_BPNT1	1-220058669	Male	1
ENSG00000162928_PEX13	2-61049630	Male	1
ENSG00000162928_PEX13	2-61049653	Female	1
ENSG00000162928_PEX13	2-61049699	Female	1
ENSG00000163131_CTSS	1-150731131	Male	1
ENSG00000163131_CTSS	1-150731185	Male	1
ENSG00000163131_CTSS	1-150731196	Male	1
ENSG00000163131_CTSS	1-150731276	Male	1
ENSG00000163131_CTSS	1-150732007	Female	1
ENSG00000163131_CTSS	1-150732068	Male	1
ENSG00000163131_CTSS	1-150732109	Male	1
ENSG00000163131_CTSS	1-150732161	Female	1
ENSG00000163131_CTSS	1-150732178	Male	1
ENSG00000163249_CCNYL1	2-207754926	Female	1
ENSG00000163249_CCNYL1	2-207754945	Male	1
ENSG00000163249_CCNYL1	2-207755018	Male	1
ENSG00000163249_CCNYL1	2-207755025	Male	1
ENSG00000163257_DCAF16	4-17801991	Female	1
ENSG00000163257_DCAF16	4-17802058	Female	1
ENSG00000163257_DCAF16	4-17803229	Male	1
ENSG00000163466_ARPC2	2-218235856	Male	1
ENSG00000163466_ARPC2	2-218235983	Female	1
ENSG00000163466_ARPC2	2-218236685	Male	1
ENSG00000163466_ARPC2	2-218236698	Female	1
ENSG00000163466_ARPC2	2-218237670	Male	1
ENSG00000163626_COX18	4-73057261	Male	1
ENSG00000163626_COX18	4-73057379	Male	1
ENSG00000163626_COX18	4-73057380	Male	1
ENSG00000163633_C4orf36	4-86876372	Male	1
ENSG00000163655_GMPS	3-155943110	Female	1
ENSG00000163683_SMIM14	4-39549358	Male	1
ENSG00000163683_SMIM14	4-39549388	Female	1
ENSG00000163683_SMIM14	4-39549388	Male	1
ENSG00000163683_SMIM14	4-39549547	Male	1
ENSG00000163683_SMIM14	4-39549559	Male	1
ENSG00000163719_MTMR14	3-9700945	Male	1
ENSG00000163807_KIAA1143	3-44749132	Male	1
ENSG00000163807_KIAA1143	3-44749281	Male	1
ENSG00000163807_KIAA1143	3-44749367	Female	1
ENSG00000163807_KIAA1143	3-44749859	Male	1
ENSG00000163807_KIAA1143	3-44749905	Male	1
ENSG00000163812_ZDHHC3	3-44923208	Male	1
ENSG00000163812_ZDHHC3	3-44923687	Male	1
ENSG00000163882_POLR2H	3-184363875	Female	1
ENSG00000163882_POLR2H	3-184363953	Female	1
ENSG00000163882_POLR2H	3-184363953	Male	1
ENSG00000163882_POLR2H	3-184364307	Male	1
ENSG00000163882_POLR2H	3-184364330	Male	1
ENSG00000164116_GUCY1A1	4-155733600	Female	1
ENSG00000164292_RHOBTB3	5-95792538	Female	1
ENSG00000164733_CTSB	8-11842861	Male	1
ENSG00000164808_SPIDR	8-47511265	Male	1
ENSG00000164808_SPIDR	8-47511992	Male	1
ENSG00000164808_SPIDR	8-47511995	Male	1
ENSG00000164828_SUN1	7-880140	Female	1
ENSG00000164828_SUN1	7-880964	Female	1
ENSG00000164902_PHAX	5-126625355	Male	1
ENSG00000164902_PHAX	5-126625387	Male	1
ENSG00000164902_PHAX	5-126625474	Male	1
ENSG00000164902_PHAX	5-126625476	Male	1
ENSG00000164902_PHAX	5-126625931	Male	1
ENSG00000164902_PHAX	5-126625956	Female	1
ENSG00000164902_PHAX	5-126625957	Male	1
ENSG00000164944_VIRMA	8-94491576	Female	1
ENSG00000165055_METTL2B	7-128503568	Male	1
ENSG00000165055_METTL2B	7-128504976	Male	1
ENSG00000165959_CLMN	14-95185097	Male	1
ENSG00000166012_TAF1D	11-93735426	Female	1
ENSG00000166012_TAF1D	11-93735478	Female	1
ENSG00000166199_ALKBH3	11-43898444	Female	1
ENSG00000166199_ALKBH3	11-43898586	Male	1
ENSG00000166199_ALKBH3	11-43898647	Male	1
ENSG00000166250_CLMP	11-123071672	Female	1
ENSG00000166250_CLMP	11-123071672	Male	1
ENSG00000166295_ANAPC16	10-72234025	Female	1
ENSG00000166295_ANAPC16	10-72234107	Female	1
ENSG00000166295_ANAPC16	10-72234111	Male	1
ENSG00000166295_ANAPC16	10-72234152	Male	1
ENSG00000166295_ANAPC16	10-72235076	Female	1
ENSG00000166295_ANAPC16	10-72235263	Male	1
ENSG00000166295_ANAPC16	10-72235331	Female	1
ENSG00000166295_ANAPC16	10-72235332	Female	1
ENSG00000166295_ANAPC16	10-72235345	Male	1
ENSG00000166323_C11orf65	11-108365758	Male	1
ENSG00000166323_C11orf65	11-108365796	Male	1
ENSG00000166441_RPL27A	11-8687235	Male	1
ENSG00000166441_RPL27A	11-8687238	Male	1
ENSG00000166441_RPL27A	11-8687278	Female	1
ENSG00000166441_RPL27A	11-8687278	Male	1
ENSG00000166451_CENPN	16-81030731	Male	1
ENSG00000166471_TMEM41B	11-9291872	Female	1
ENSG00000166822_TMEM170A	16-75445412	Female	1
ENSG00000166822_TMEM170A	16-75445426	Male	1
ENSG00000166822_TMEM170A	16-75445572	Male	1
ENSG00000166822_TMEM170A	16-75445576	Male	1
ENSG00000166822_TMEM170A	16-75446009	Female	1
ENSG00000166822_TMEM170A	16-75446075	Male	1
ENSG00000166839_ANKDD1A	15-64956360	Female	1
ENSG00000166855_CLPX	15-65150145	Male	1
ENSG00000167065_DUSP18	22-30660998	Male	1
ENSG00000167113_COQ4	9-128327658	Female	1
ENSG00000167113_COQ4	9-128331105	Female	1
ENSG00000167113_COQ4	9-128331692	Female	1
ENSG00000167113_COQ4	9-128331692	Male	1
ENSG00000167123_CERCAM	9-128426230	Male	1
ENSG00000167232_ZNF91	19-23339828	Female	1
ENSG00000167244_IGF2	11-2129619	Male	1
ENSG00000167460_TPM4	19-16080628	Female	1
ENSG00000167460_TPM4	19-16080691	Female	1
ENSG00000167460_TPM4	19-16080692	Female	1
ENSG00000167460_TPM4	19-16080764	Female	1
ENSG00000167595_PROSER3	19-35770266	Female	1
ENSG00000167595_PROSER3	19-35770756	Female	1
ENSG00000167595_PROSER3	19-35770769	Male	1
ENSG00000167595_PROSER3	19-35770783	Female	1
ENSG00000167657_DAPK3	19-3962642	Male	1
ENSG00000167657_DAPK3	19-3963026	Female	1
ENSG00000167703_SLC43A2	17-1583981	Male	1
ENSG00000167766_ZNF83	19-52618252	Male	1
ENSG00000167766_ZNF83	19-52642429	Female	1
ENSG00000167766_ZNF83	19-52643649	Female	1
ENSG00000167766_ZNF83	19-52646078	Male	1
ENSG00000167766_ZNF83	19-52646167	Male	1
ENSG00000167766_ZNF83	19-52647541	Male	1
ENSG00000168014_C2CD3	11-74132264	Female	1
ENSG00000168056_LTBP3	11-65549514	Male	1
ENSG00000168056_LTBP3	11-65549861	Male	1
ENSG00000168172_HOOK3	8-43020593	Female	1
ENSG00000168172_HOOK3	8-43020843	Female	1
ENSG00000168172_HOOK3	8-43020843	Male	1
ENSG00000168172_HOOK3	8-43020981	Male	1
ENSG00000168172_HOOK3	8-43021749	Male	1
ENSG00000168172_HOOK3	8-43023091	Male	1
ENSG00000168389_MFSD2A	1-39959772	Female	1
ENSG00000168389_MFSD2A	1-39959775	Male	1
ENSG00000168542_COL3A1	2-189011808	Male	1
ENSG00000168575_SLC20A2	8-42531915	Male	1
ENSG00000168575_SLC20A2	8-42533472	Female	1
ENSG00000168575_SLC20A2	8-42533516	Male	1
ENSG00000168575_SLC20A2	8-42533771	Male	1
ENSG00000168575_SLC20A2	8-42533796	Male	1
ENSG00000168575_SLC20A2	8-42534132	Male	1
ENSG00000168724_DNAJC21	5-34953082	Female	1
ENSG00000168807_SNTB2	16-69306869	Male	1
ENSG00000168883_USP39	2-85609818	Male	1
ENSG00000168883_USP39	2-85609819	Male	1
ENSG00000168887_C2orf68	2-85609818	Male	1
ENSG00000168887_C2orf68	2-85609819	Male	1
ENSG00000169062_UPF3A	13-114284122	Male	1
ENSG00000169062_UPF3A	13-114284241	Female	1
ENSG00000169062_UPF3A	13-114284283	Female	1
ENSG00000169231_THBS3	1-155203900	Female	1
ENSG00000169231_THBS3	1-155203900	Male	1
ENSG00000169231_THBS3	1-155203982	Male	1
ENSG00000169239_CA5B	X-15783537	Male	1
ENSG00000169282_KCNAB1	3-156044857	Male	1
ENSG00000169495_HTRA4	8-38979779	Male	1
ENSG00000169499_PLEKHA2	8-38970748	Male	1
ENSG00000169567_HINT1	5-131159990	Male	1
ENSG00000169567_HINT1	5-131201527	Male	1
ENSG00000169567_HINT1	5-131201694	Female	1
ENSG00000169567_HINT1	5-131201694	Male	1
ENSG00000169567_HINT1	5-131202383	Male	1
ENSG00000169567_HINT1	5-131202387	Male	1
ENSG00000169567_HINT1	5-131202443	Female	1
ENSG00000169567_HINT1	5-131202443	Male	1
ENSG00000169609_C15orf40	15-83005409	Female	1
ENSG00000169756_LIMS1	2-108596580	Female	1
ENSG00000169895_SYAP1	X-16763192	Male	1
ENSG00000169895_SYAP1	X-16764055	Male	1
ENSG00000169905_TOR1AIP2	1-179860449	Male	1
ENSG00000170088_TMEM192	4-165075214	Female	1
ENSG00000170088_TMEM192	4-165075533	Female	1
ENSG00000170088_TMEM192	4-165078996	Male	1
ENSG00000170145_SIK2	11-111728911	Male	1
ENSG00000170190_SLC16A5	17-75099448	Male	1
ENSG00000170190_SLC16A5	17-75099628	Female	1
ENSG00000170190_SLC16A5	17-75099674	Female	1
ENSG00000170190_SLC16A5	17-75104520	Male	1
ENSG00000170946_DNAJC24	11-31431203	Female	1
ENSG00000170946_DNAJC24	11-31431288	Male	1
ENSG00000170946_DNAJC24	11-31431672	Male	1
ENSG00000170946_DNAJC24	11-31431721	Male	1
ENSG00000171121_KCNMB3	3-179260422	Male	1
ENSG00000171121_KCNMB3	3-179260444	Male	1
ENSG00000171121_KCNMB3	3-179260875	Male	1
ENSG00000171121_KCNMB3	3-179260887	Male	1
ENSG00000171295_ZNF440	19-11834401	Female	1
ENSG00000171451_DSEL	18-67507104	Male	1
ENSG00000171451_DSEL	18-67507252	Male	1
ENSG00000171475_WIPF2	17-40283521	Female	1
ENSG00000171631_P2RY6	11-73303598	Female	1
ENSG00000171862_PTEN	10-87946046	Male	1
ENSG00000171862_PTEN	10-87946054	Male	1
ENSG00000171862_PTEN	10-87946056	Male	1
ENSG00000172006_ZNF554	19-2835880	Male	1
ENSG00000172493_AFF1	4-86995126	Female	1
ENSG00000172775_PSME3IP1	16-57177869	Male	1
ENSG00000172775_PSME3IP1	16-57182827	Female	1
ENSG00000172824_CES4A	16-67005726	Male	1
ENSG00000172840_PDP2	16-66890205	Male	1
ENSG00000172888_ZNF621	3-40536194	Male	1
ENSG00000172888_ZNF621	3-40537506	Male	1
ENSG00000173083_HPSE	4-83294171	Male	1
ENSG00000173214_MFSD4B	6-111270468	Female	1
ENSG00000173214_MFSD4B	6-111271676	Female	1
ENSG00000173214_MFSD4B	6-111271676	Male	1
ENSG00000173214_MFSD4B	6-111271682	Female	1
ENSG00000173214_MFSD4B	6-111271682	Male	1
ENSG00000173214_MFSD4B	6-111275590	Male	1
ENSG00000173221_GLRX	5-95792538	Female	1
ENSG00000173467_AGR3	7-16864729	Female	1
ENSG00000173480_ZNF417	19-57907125	Male	1
ENSG00000173575_CHD2	15-92893938	Female	1
ENSG00000173614_NMNAT1	1-9982985	Female	1
ENSG00000173614_NMNAT1	1-9984252	Male	1
ENSG00000173821_RNF213	17-80320453	Female	1
ENSG00000173821_RNF213	17-80320453	Male	1
ENSG00000173821_RNF213	17-80320928	Female	1
ENSG00000173821_RNF213	17-80320942	Male	1
ENSG00000173960_UBXN2A	2-24002671	Female	1
ENSG00000174574_AKIRIN1	1-38995966	Female	1
ENSG00000174839_DENND6A	3-57627308	Male	1
ENSG00000174945_AMZ1	7-2722883	Female	1
ENSG00000174945_AMZ1	7-2722883	Male	1
ENSG00000174989_FBXW8	12-117029775	Male	1
ENSG00000174989_FBXW8	12-117029847	Female	1
ENSG00000174989_FBXW8	12-117029848	Male	1
ENSG00000175352_NRIP3	11-8972911	Female	1
ENSG00000175352_NRIP3	11-8975599	Male	1
ENSG00000175414_ARL10	5-176379298	Male	1
ENSG00000175538_KCNE3	11-74455795	Female	1
ENSG00000175538_KCNE3	11-74455801	Female	1
ENSG00000176014_TUBB6	18-12322181	Male	1
ENSG00000176014_TUBB6	18-12323765	Female	1
ENSG00000176720_BOK	2-241572723	Male	1
ENSG00000176953_NFATC2IP	16-28955119	Female	1
ENSG00000176953_NFATC2IP	16-28955357	Female	1
ENSG00000177082_WDR73	15-84641599	Female	1
ENSG00000177082_WDR73	15-84642257	Male	1
ENSG00000177225_GATD1	11-767886	Male	1
ENSG00000177225_GATD1	11-767947	Male	1
ENSG00000177225_GATD1	11-767966	Male	1
ENSG00000177225_GATD1	11-767989	Male	1
ENSG00000177225_GATD1	11-768303	Male	1
ENSG00000177225_GATD1	11-768321	Male	1
ENSG00000177225_GATD1	11-768383	Male	1
ENSG00000177225_GATD1	11-768393	Male	1
ENSG00000177225_GATD1	11-768609	Male	1
ENSG00000177225_GATD1	11-768722	Female	1
ENSG00000177225_GATD1	11-769001	Female	1
ENSG00000177225_GATD1	11-769054	Female	1
ENSG00000177225_GATD1	11-769581	Male	1
ENSG00000177225_GATD1	11-769738	Male	1
ENSG00000177225_GATD1	11-769766	Female	1
ENSG00000177225_GATD1	11-769883	Male	1
ENSG00000177363_LRRN4CL	11-62687035	Male	1
ENSG00000177425_PAWR	12-79597137	Male	1
ENSG00000177663_IL17RA	22-17113215	Male	1
ENSG00000177675_CD163L1	12-7439562	Male	1
ENSG00000177675_CD163L1	12-7439708	Male	1
ENSG00000177675_CD163L1	12-7439728	Female	1
ENSG00000178852_EFCAB13	17-47424342	Female	1
ENSG00000178974_FBXO34	14-55367498	Male	1
ENSG00000178974_FBXO34	14-55367600	Male	1
ENSG00000178974_FBXO34	14-55367643	Male	1
ENSG00000178974_FBXO34	14-55368248	Male	1
ENSG00000178974_FBXO34	14-55368402	Male	1
ENSG00000178974_FBXO34	14-55368515	Male	1
ENSG00000179913_B3GNT3	19-17809336	Male	1
ENSG00000180228_PRKRA	2-178435308	Male	1
ENSG00000180228_PRKRA	2-178445823	Female	1
ENSG00000180596_H2BC4	6-26095234	Female	1
ENSG00000180596_H2BC4	6-26095240	Female	1
ENSG00000180596_H2BC4	6-26095240	Male	1
ENSG00000180596_H2BC4	6-26095289	Male	1
ENSG00000180596_H2BC4	6-26095317	Female	1
ENSG00000180596_H2BC4	6-26095323	Female	1
ENSG00000180596_H2BC4	6-26095406	Female	1
ENSG00000180596_H2BC4	6-26095414	Male	1
ENSG00000180596_H2BC4	6-26096234	Male	1
ENSG00000180596_H2BC4	6-26096395	Female	1
ENSG00000180596_H2BC4	6-26096396	Male	1
ENSG00000180596_H2BC4	6-26096408	Male	1
ENSG00000180758_GPR157	1-9101172	Male	1
ENSG00000180758_GPR157	1-9101274	Male	1
ENSG00000180758_GPR157	1-9102364	Female	1
ENSG00000180776_ZDHHC20	13-21374916	Male	1
ENSG00000180776_ZDHHC20	13-21374968	Male	1
ENSG00000180902_D2HGDH	2-241746496	Male	1
ENSG00000181513_ACBD4	17-45142695	Female	1
ENSG00000181894_ZNF329	19-58126774	Male	1
ENSG00000182118_FAM89A	1-231021928	Female	1
ENSG00000182141_ZNF708	19-21292170	Male	1
ENSG00000182141_ZNF708	19-21292228	Female	1
ENSG00000182180_MRPS16	10-73248973	Male	1
ENSG00000182180_MRPS16	10-73249115	Male	1
ENSG00000182180_MRPS16	10-73250084	Male	1
ENSG00000182240_BACE2	21-41173660	Female	1
ENSG00000182240_BACE2	21-41173689	Male	1
ENSG00000182378_PLCXD1	X-279654	Female	1
ENSG00000182378_PLCXD1	X-280088	Female	1
ENSG00000182378_PLCXD1	X-299548	Female	1
ENSG00000182446_NPLOC4	17-81562828	Female	1
ENSG00000182534_MXRA7	17-76675428	Male	1
ENSG00000182749_PAQR7	1-25867175	Female	1
ENSG00000182752_PAPPA	9-116236399	Female	1
ENSG00000182752_PAPPA	9-116237981	Male	1
ENSG00000182768_NGRN	15-90275566	Male	1
ENSG00000182768_NGRN	15-90275577	Male	1
ENSG00000182796_TMEM198B	12-55834374	Female	1
ENSG00000182796_TMEM198B	12-55834381	Female	1
ENSG00000182796_TMEM198B	12-55834507	Male	1
ENSG00000182796_TMEM198B	12-55834511	Female	1
ENSG00000182796_TMEM198B	12-55834541	Female	1
ENSG00000182831_HAPSTR1	16-9110931	Female	1
ENSG00000182831_HAPSTR1	16-9110970	Male	1
ENSG00000182963_GJC1	17-44799370	Female	1
ENSG00000182963_GJC1	17-44799780	Female	1
ENSG00000182963_GJC1	17-44799875	Female	1
ENSG00000182963_GJC1	17-44800253	Female	1
ENSG00000182963_GJC1	17-44800253	Male	1
ENSG00000182963_GJC1	17-44801110	Male	1
ENSG00000182963_GJC1	17-44801676	Female	1
ENSG00000182963_GJC1	17-44801680	Female	1
ENSG00000182963_GJC1	17-44801689	Male	1
ENSG00000182986_ZNF320	19-52878858	Male	1
ENSG00000182986_ZNF320	19-52880159	Male	1
ENSG00000182986_ZNF320	19-52895689	Male	1
ENSG00000183171_LOC643015	X-150114626	Female	1
ENSG00000183171_LOC643015	X-150114635	Female	1
ENSG00000183171_LOC643015	X-150114646	Female	1
ENSG00000183171_LOC643015	X-150114986	Male	1
ENSG00000183171_LOC643015	X-150115003	Male	1
ENSG00000183255_PTTG1IP	21-44869498	Female	1
ENSG00000183323_CCDC125	5-69280917	Female	1
ENSG00000183323_CCDC125	5-69282476	Male	1
ENSG00000183323_CCDC125	5-69282479	Male	1
ENSG00000183397_TEKTIP1	19-3539995	Female	1
ENSG00000183397_TEKTIP1	19-3540176	Male	1
ENSG00000183397_TEKTIP1	19-3540318	Female	1
ENSG00000183397_TEKTIP1	19-3541021	Male	1
ENSG00000183597_TANGO2	22-20065403	Male	1
ENSG00000183696_UPP1	7-48104042	Female	1
ENSG00000183696_UPP1	7-48104146	Male	1
ENSG00000183696_UPP1	7-48106494	Male	1
ENSG00000183696_UPP1	7-48106508	Male	1
ENSG00000183696_UPP1	7-48106573	Female	1
ENSG00000183696_UPP1	7-48106573	Male	1
ENSG00000184313_MROH7	1-54647541	Male	1
ENSG00000184575_XPOT	12-64450291	Female	1
ENSG00000184988_TMEM106A	17-43218611	Female	1
ENSG00000184988_TMEM106A	17-43219638	Female	1
ENSG00000184992_BRI3BP	12-125027961	Male	1
ENSG00000185158_LRRC37B	17-32041100	Female	1
ENSG00000185324_CDK10	16-89687664	Female	1
ENSG00000185324_CDK10	16-89687664	Male	1
ENSG00000185324_CDK10	16-89688267	Female	1
ENSG00000185324_CDK10	16-89688334	Female	1
ENSG00000185324_CDK10	16-89688980	Female	1
ENSG00000185324_CDK10	16-89689021	Male	1
ENSG00000185324_CDK10	16-89689720	Female	1
ENSG00000185361_TNFAIP8L1	19-4654585	Female	1
ENSG00000185414_MRPL30	2-99195984	Male	1
ENSG00000185414_MRPL30	2-99196002	Female	1
ENSG00000185414_MRPL30	2-99196345	Male	1
ENSG00000185432_METTL7A	12-50931504	Male	1
ENSG00000185432_METTL7A	12-50931636	Male	1
ENSG00000185527_PDE6G	17-81651116	Male	1
ENSG00000185527_PDE6G	17-81651131	Male	1
ENSG00000185527_PDE6G	17-81651137	Male	1
ENSG00000185527_PDE6G	17-81651143	Male	1
ENSG00000185561_TLCD2	17-1707153	Female	1
ENSG00000185666_SYN3	22-32861081	Male	1
ENSG00000185684_EP400P1	12-132126692	Male	1
ENSG00000185880_TRIM69	15-44733160	Male	1
ENSG00000185880_TRIM69	15-44733569	Female	1
ENSG00000186001_LRCH3	3-197884177	Male	1
ENSG00000186001_LRCH3	3-197884419	Male	1
ENSG00000186001_LRCH3	3-197885349	Male	1
ENSG00000186001_LRCH3	3-197885386	Female	1
ENSG00000186001_LRCH3	3-197885396	Male	1
ENSG00000186001_LRCH3	3-197885397	Male	1
ENSG00000186001_LRCH3	3-197885489	Male	1
ENSG00000186001_LRCH3	3-197885522	Male	1
ENSG00000186166_CENATAC	11-119004726	Female	1
ENSG00000186166_CENATAC	11-119004980	Female	1
ENSG00000186166_CENATAC	11-119007323	Female	1
ENSG00000186166_CENATAC	11-119009244	Female	1
ENSG00000186166_CENATAC	11-119009890	Male	1
ENSG00000186166_CENATAC	11-119010007	Female	1
ENSG00000186166_CENATAC	11-119010009	Female	1
ENSG00000186166_CENATAC	11-119010009	Male	1
ENSG00000186166_CENATAC	11-119010086	Male	1
ENSG00000186166_CENATAC	11-119010099	Male	1
ENSG00000186197_EDARADD	1-236483559	Female	1
ENSG00000186197_EDARADD	1-236483854	Female	1
ENSG00000186197_EDARADD	1-236483980	Female	1
ENSG00000186197_EDARADD	1-236483989	Female	1
ENSG00000186197_EDARADD	1-236484040	Female	1
ENSG00000186197_EDARADD	1-236484196	Male	1
ENSG00000186197_EDARADD	1-236484510	Male	1
ENSG00000186532_SMYD4	17-1781012	Male	1
ENSG00000186532_SMYD4	17-1781124	Female	1
ENSG00000186567_CEACAM19	19-44665523	Male	1
ENSG00000186567_CEACAM19	19-44665527	Male	1
ENSG00000186687_LYRM7	5-131201527	Male	1
ENSG00000186687_LYRM7	5-131201694	Female	1
ENSG00000186687_LYRM7	5-131201694	Male	1
ENSG00000186687_LYRM7	5-131202383	Male	1
ENSG00000186687_LYRM7	5-131202387	Male	1
ENSG00000186687_LYRM7	5-131202443	Female	1
ENSG00000186687_LYRM7	5-131202443	Male	1
ENSG00000186716_BCR	22-23263508	Female	1
ENSG00000186716_BCR	22-23264129	Male	1
ENSG00000186812_ZNF397	18-35247800	Female	1
ENSG00000186812_ZNF397	18-35247800	Male	1
ENSG00000186812_ZNF397	18-35248659	Male	1
ENSG00000187650_VMAC	19-5909710	Female	1
ENSG00000188112_C6orf132	6-42098117	Male	1
ENSG00000188676_IDO2	8-39969754	Female	1
ENSG00000188676_IDO2	8-39971909	Male	1
ENSG00000188676_IDO2	8-39977574	Female	1
ENSG00000188676_IDO2	8-39985114	Male	1
ENSG00000188735_TMEM120B	12-121777086	Female	1
ENSG00000188735_TMEM120B	12-121777095	Female	1
ENSG00000188770_OPTC	1-203506220	Male	1
ENSG00000188846_RPL14	3-40462644	Male	1
ENSG00000188917_TRMT2B	X-101009593	Female	1
ENSG00000189320_FAM180A	7-135733606	Female	1
ENSG00000189339_SLC35E2B	1-1663539	Male	1
ENSG00000189339_SLC35E2B	1-1663592	Female	1
ENSG00000189339_SLC35E2B	1-1663609	Male	1
ENSG00000189339_SLC35E2B	1-1664088	Male	1
ENSG00000189339_SLC35E2B	1-1664101	Female	1
ENSG00000196262_PPIA	7-44802258	Male	1
ENSG00000196262_PPIA	7-44802329	Male	1
ENSG00000196365_LONP1	19-5710169	Female	1
ENSG00000196705_ZNF431	19-21184300	Male	1
ENSG00000196705_ZNF431	19-21185663	Male	1
ENSG00000196705_ZNF431	19-21190863	Female	1
ENSG00000196705_ZNF431	19-21191330	Female	1
ENSG00000196743_GM2A	5-151268442	Female	1
ENSG00000196878_LAMB3	1-209622976	Male	1
ENSG00000196968_FUT11	10-73776264	Male	1
ENSG00000196968_FUT11	10-73776414	Male	1
ENSG00000196968_FUT11	10-73776527	Male	1
ENSG00000196968_FUT11	10-73776780	Female	1
ENSG00000196968_FUT11	10-73777672	Female	1
ENSG00000196968_FUT11	10-73778325	Female	1
ENSG00000196968_FUT11	10-73778382	Male	1
ENSG00000196968_FUT11	10-73779545	Female	1
ENSG00000197006_METTL9	16-21639981	Female	1
ENSG00000197006_METTL9	16-21640001	Female	1
ENSG00000197006_METTL9	16-21640001	Male	1
ENSG00000197006_METTL9	16-21640015	Female	1
ENSG00000197006_METTL9	16-21640015	Male	1
ENSG00000197006_METTL9	16-21640211	Female	1
ENSG00000197006_METTL9	16-21640219	Female	1
ENSG00000197006_METTL9	16-21640506	Female	1
ENSG00000197006_METTL9	16-21640710	Female	1
ENSG00000197070_ARRDC1	9-137610465	Male	1
ENSG00000197070_ARRDC1	9-137611300	Male	1
ENSG00000197170_PSMD12	17-67338637	Male	1
ENSG00000197170_PSMD12	17-67338651	Male	1
ENSG00000197170_PSMD12	17-67338712	Male	1
ENSG00000197170_PSMD12	17-67338740	Female	1
ENSG00000197170_PSMD12	17-67338751	Female	1
ENSG00000197321_SVIL	10-29460860	Male	1
ENSG00000197343_ZNF655	7-99567952	Female	1
ENSG00000197343_ZNF655	7-99568008	Female	1
ENSG00000197343_ZNF655	7-99568441	Male	1
ENSG00000197429_IPP	1-45697343	Female	1
ENSG00000197429_IPP	1-45697470	Male	1
ENSG00000197429_IPP	1-45697471	Male	1
ENSG00000197429_IPP	1-45697524	Male	1
ENSG00000197429_IPP	1-45698229	Female	1
ENSG00000197429_IPP	1-45698811	Female	1
ENSG00000197555_SIPA1L1	14-71330756	Male	1
ENSG00000197608_ZNF841	19-52064706	Male	1
ENSG00000197608_ZNF841	19-52064730	Male	1
ENSG00000197608_ZNF841	19-52064762	Male	1
ENSG00000197608_ZNF841	19-52064837	Male	1
ENSG00000197756_RPL37A	2-216501818	Male	1
ENSG00000197756_RPL37A	2-216502145	Male	1
ENSG00000197756_RPL37A	2-216502171	Male	1
ENSG00000197756_RPL37A	2-216502196	Female	1
ENSG00000197756_RPL37A	2-216502198	Female	1
ENSG00000197756_RPL37A	2-216502206	Female	1
ENSG00000197912_LOC101930112	16-89520477	Male	1
ENSG00000197912_SPG7	16-89520477	Male	1
ENSG00000198001_IRAK4	12-43787936	Female	1
ENSG00000198001_IRAK4	12-43788679	Male	1
ENSG00000198089_SFI1	22-31607521	Male	1
ENSG00000198408_OGA	10-101787871	Male	1
ENSG00000198408_OGA	10-101789264	Male	1
ENSG00000198408_OGA	10-101789723	Female	1
ENSG00000198408_OGA	10-101811186	Female	1
ENSG00000198466_ZNF587	19-57860381	Female	1
ENSG00000198466_ZNF587	19-57860701	Female	1
ENSG00000198466_ZNF587	19-57861379	Female	1
ENSG00000198466_ZNF587	19-57863932	Female	1
ENSG00000198466_ZNF587	19-57863954	Male	1
ENSG00000198625_MDM4	1-204555235	Male	1
ENSG00000198625_MDM4	1-204555738	Male	1
ENSG00000198625_MDM4	1-204555822	Male	1
ENSG00000198625_MDM4	1-204556656	Male	1
ENSG00000198796_ALPK2	18-58538755	Female	1
ENSG00000198796_ALPK2	18-58538789	Female	1
ENSG00000204128_C2orf72	2-231047420	Female	1
ENSG00000204138_PHACTR4	1-28498819	Female	1
ENSG00000204138_PHACTR4	1-28498819	Male	1
ENSG00000204138_PHACTR4	1-28498921	Female	1
ENSG00000204138_PHACTR4	1-28498954	Female	1
ENSG00000204138_PHACTR4	1-28498993	Female	1
ENSG00000204138_PHACTR4	1-28499200	Male	1
ENSG00000204138_PHACTR4	1-28499307	Male	1
ENSG00000204138_PHACTR4	1-28499318	Male	1
ENSG00000204138_PHACTR4	1-28499519	Female	1
ENSG00000204138_PHACTR4	1-28499519	Male	1
ENSG00000204138_PHACTR4	1-28499573	Male	1
ENSG00000204138_PHACTR4	1-28499606	Male	1
ENSG00000204138_PHACTR4	1-28499638	Female	1
ENSG00000204219_TCEA3	1-23381148	Male	1
ENSG00000204252_HLA-DOA	6-33005440	Male	1
ENSG00000204252_HLA-DOA	6-33005645	Female	1
ENSG00000204514_ZNF814	19-57860381	Female	1
ENSG00000204514_ZNF814	19-57860701	Female	1
ENSG00000204514_ZNF814	19-57861379	Female	1
ENSG00000204514_ZNF814	19-57863932	Female	1
ENSG00000204514_ZNF814	19-57863954	Male	1
ENSG00000204514_ZNF814	19-57867785	Female	1
ENSG00000204514_ZNF814	19-57867810	Female	1
ENSG00000204574_ABCF1	6-30593205	Male	1
ENSG00000204574_ABCF1	6-30593231	Male	1
ENSG00000204592_HLA-E	6-30491658	Female	1
ENSG00000205517_RGL3	19-11394898	Female	1
ENSG00000205758_CRYZL1	21-33591875	Female	1
ENSG00000205758_CRYZL1	21-33591895	Male	1
ENSG00000205758_CRYZL1	21-33592807	Male	1
ENSG00000205758_CRYZL1	21-33593809	Female	1
ENSG00000206538_VGLL3	3-86941796	Male	1
ENSG00000208005_MIR503	X-134546392	Male	1
ENSG00000211451_GNRHR2	1-145921979	Male	1
ENSG00000211451_GNRHR2	1-145921980	Female	1
ENSG00000211451_GNRHR2	1-145922969	Male	1
ENSG00000211451_GNRHR2	1-145923014	Female	1
ENSG00000212643_ZRSR2P1	5-112891790	Male	1
ENSG00000213064_SFT2D2	1-168251251	Male	1
ENSG00000213218_CSH2	17-63872049	Female	1
ENSG00000213225_NOC2LP1	2-130229974	Male	1
ENSG00000213225_NOC2LP1	2-130230074	Female	1
ENSG00000213225_NOC2LP1	2-130230106	Female	1
ENSG00000213225_NOC2LP1	2-130230844	Female	1
ENSG00000213225_NOC2LP1	2-130231577	Female	1
ENSG00000213463_SYNJ2BP	14-70369354	Male	1
ENSG00000213468_FIRRE	X-131795803	Female	1
ENSG00000213468_FIRRE	X-131795803	Male	1
ENSG00000213468_FIRRE	X-131795856	Male	1
ENSG00000213468_FIRRE	X-131795880	Female	1
ENSG00000213516_RBMXL1	1-88982873	Female	1
ENSG00000213693_SEC14L1P1	11-43898444	Female	1
ENSG00000213693_SEC14L1P1	11-43898586	Male	1
ENSG00000213693_SEC14L1P1	11-43898647	Male	1
ENSG00000213753_CENPBD2P	19-58584082	Female	1
ENSG00000213753_CENPBD2P	19-58584082	Male	1
ENSG00000213753_RPL23AP79	19-58584082	Female	1
ENSG00000213753_RPL23AP79	19-58584082	Male	1
ENSG00000213753_CENPBD2P	19-58584089	Male	1
ENSG00000213753_RPL23AP79	19-58584089	Male	1
ENSG00000213853_EMP2	16-10529687	Female	1
ENSG00000213853_EMP2	16-10529701	Female	1
ENSG00000213853_EMP2	16-10529893	Male	1
ENSG00000213853_EMP2	16-10531244	Female	1
ENSG00000213853_EMP2	16-10531390	Female	1
ENSG00000213853_EMP2	16-10531456	Female	1
ENSG00000213853_EMP2	16-10531468	Female	1
ENSG00000213853_EMP2	16-10531468	Male	1
ENSG00000213853_EMP2	16-10531469	Male	1
ENSG00000213853_EMP2	16-10531549	Male	1
ENSG00000213853_EMP2	16-10531557	Female	1
ENSG00000213853_EMP2	16-10531557	Male	1
ENSG00000213918_DNASE1	16-3660826	Female	1
ENSG00000213918_DNASE1	16-3678734	Male	1
ENSG00000214021_TTLL3	3-9818486	Female	1
ENSG00000214046_SMIM7	19-16634605	Female	1
ENSG00000214046_SMIM7	19-16634683	Female	1
ENSG00000214046_SMIM7	19-16640821	Female	1
ENSG00000214046_SMIM7	19-16640833	Female	1
ENSG00000214046_SMIM7	19-16641691	Male	1
ENSG00000214078_CPNE1	20-35629797	Male	1
ENSG00000214078_CPNE1	20-35629823	Male	1
ENSG00000214087_ARL16	17-81681366	Female	1
ENSG00000214193_SH3D21	1-36328673	Female	1
ENSG00000214548_MEG3	14-100835286	Male	1
ENSG00000215769_ARHGAP27P1-BPTFP1-KPNA2P3	17-64751217	Male	1
ENSG00000215769_ARHGAP27P1-BPTFP1-KPNA2P3	17-64751232	Female	1
ENSG00000221963_APOL6	22-35659866	Male	1
ENSG00000221963_APOL6	22-35659869	Male	1
ENSG00000221963_APOL6	22-35660551	Male	1
ENSG00000221963_APOL6	22-35660685	Male	1
ENSG00000221963_APOL6	22-35661308	Male	1
ENSG00000222009_BTBD19	1-44814763	Female	1
ENSG00000223496_EXOSC6	16-70249335	Male	1
ENSG00000223959_AFG3L1P	16-89984987	Female	1
ENSG00000223960_CHROMR	2-178435308	Male	1
ENSG00000224287_MSL3P1	2-233866185	Female	1
ENSG00000224287_MSL3P1	2-233866419	Female	1
ENSG00000224287_MSL3P1	2-233866463	Female	1
ENSG00000224287_MSL3P1	2-233866463	Male	1
ENSG00000224287_MSL3P1	2-233866993	Male	1
ENSG00000224287_MSL3P1	2-233867035	Male	1
ENSG00000224287_MSL3P1	2-233867117	Female	1
ENSG00000224287_MSL3P1	2-233867118	Male	1
ENSG00000224287_MSL3P1	2-233867180	Female	1
ENSG00000224287_MSL3P1	2-233867255	Male	1
ENSG00000224536_CSRP1-AS1	1-201515780	Male	1
ENSG00000224892_RPS4XP16	13-51460975	Male	1
ENSG00000225470_JPX	X-74008881	Female	1
ENSG00000225733_FGD5-AS1	3-14944603	Male	1
ENSG00000225733_FGD5-AS1	3-14944630	Male	1
ENSG00000227500_SCAMP4	19-1916559	Female	1
ENSG00000228205_RPS3P3	3-184149818	Male	1
ENSG00000228451_SDAD1P1	8-26380822	Female	1
ENSG00000228451_SDAD1P1	8-26380940	Male	1
ENSG00000228526_MIR34AHG	1-9149376	Female	1
ENSG00000228716_DHFR	5-80627541	Female	1
ENSG00000228716_DHFR	5-80627542	Female	1
ENSG00000229230_MT1P3	20-35218054	Male	1
ENSG00000229847_EMX2OS	10-117485631	Female	1
ENSG00000229847_EMX2OS	10-117485758	Male	1
ENSG00000230424_EMC1-AS1	1-19215816	Male	1
ENSG00000230424_EMC1-AS1	1-19215964	Male	1
ENSG00000230424_EMC1-AS1	1-19215969	Male	1
ENSG00000230424_EMC1-AS1	1-19216127	Male	1
ENSG00000230424_EMC1-AS1	1-19216137	Female	1
ENSG00000230445_LRRC37A6P	10-27248551	Male	1
ENSG00000230445_LRRC37A6P	10-27248568	Male	1
ENSG00000230590_FTX	X-74008881	Female	1
ENSG00000230590_FTX	X-74216921	Female	1
ENSG00000230590_FTX	X-74278691	Male	1
ENSG00000230701_FBXW4P1	22-23263508	Female	1
ENSG00000230701_FBXW4P1	22-23264129	Male	1
ENSG00000230870_FBXW11P1	21-31627205	Female	1
ENSG00000231064_THBS3-AS1	1-155203900	Female	1
ENSG00000231064_THBS3-AS1	1-155203900	Male	1
ENSG00000231064_THBS3-AS1	1-155203982	Male	1
ENSG00000231312_MAP4K3-DT	2-39475362	Male	1
ENSG00000231312_MAP4K3-DT	2-39477186	Male	1
ENSG00000231721_LINC-PINT	7-130945478	Female	1
ENSG00000231925_TAPBP	6-33301317	Female	1
ENSG00000232284_GNG12-AS1	1-68162563	Female	1
ENSG00000232400_RAD17P1	7-16864729	Female	1
ENSG00000232907_DLGAP4-AS1	20-36545675	Male	1
ENSG00000232907_DLGAP4-AS1	20-36545782	Female	1
ENSG00000232907_DLGAP4-AS1	20-36546639	Female	1
ENSG00000232907_DLGAP4-AS1	20-36546739	Female	1
ENSG00000232907_DLGAP4-AS1	20-36546784	Male	1
ENSG00000232907_DLGAP4-AS1	20-36547360	Female	1
ENSG00000233006_MIR3936HG	5-132365003	Male	1
ENSG00000233369_GTF2IP4	7-73165791	Male	1
ENSG00000235703_EOLA2-DT	X-150114626	Female	1
ENSG00000235703_EOLA2-DT	X-150114635	Female	1
ENSG00000235703_EOLA2-DT	X-150114646	Female	1
ENSG00000235703_EOLA2-DT	X-150114986	Male	1
ENSG00000235703_EOLA2-DT	X-150115003	Male	1
ENSG00000236383_CCDC200	17-43218611	Female	1
ENSG00000236383_CCDC200	17-43219638	Female	1
ENSG00000236756_DNAJC9-AS1	10-73248973	Male	1
ENSG00000236756_DNAJC9-AS1	10-73249115	Male	1
ENSG00000236756_DNAJC9-AS1	10-73250084	Male	1
ENSG00000236778_INTS6-AS1	13-51460975	Male	1
ENSG00000236830_CBR3-AS1	21-36139950	Female	1
ENSG00000239388_ASB14	3-57272806	Female	1
ENSG00000239857_GET4	7-880140	Female	1
ENSG00000239857_GET4	7-880964	Female	1
ENSG00000240053_LY6G5B	6-31672531	Male	1
ENSG00000240053_LY6G5B	6-31672643	Female	1
ENSG00000240053_LY6G5B	6-31673146	Male	1
ENSG00000240053_LY6G5B	6-31673155	Male	1
ENSG00000240053_LY6G5B	6-31673159	Female	1
ENSG00000240053_LY6G5B	6-31673181	Male	1
ENSG00000240053_LY6G5B	6-31673198	Male	1
ENSG00000240053_LY6G5B	6-31673207	Male	1
ENSG00000240849_PEDS1	20-50118691	Male	1
ENSG00000240849_PEDS1	20-50118716	Male	1
ENSG00000240849_PEDS1	20-50118731	Female	1
ENSG00000241404_EGFL8	6-32165663	Male	1
ENSG00000241404_EGFL8	6-32165756	Male	1
ENSG00000241680_RPL31P49	12-110461136	Female	1
ENSG00000241878_PISD	22-31642369	Female	1
ENSG00000242498_ARPIN	15-89897250	Male	1
ENSG00000242498_ARPIN	15-89897322	Male	1
ENSG00000242498_ARPIN	15-89897328	Female	1
ENSG00000242498_ARPIN	15-89897355	Male	1
ENSG00000242498_ARPIN	15-89897363	Male	1
ENSG00000242498_ARPIN	15-89899302	Male	1
ENSG00000242498_ARPIN	15-89899312	Male	1
ENSG00000242498_ARPIN	15-89899317	Male	1
ENSG00000242498_ARPIN	15-89899357	Female	1
ENSG00000242498_ARPIN	15-89899374	Female	1
ENSG00000242779_ZNF702P	19-53012380	Male	1
ENSG00000242779_ZNF702P	19-53012908	Female	1
ENSG00000242779_ZNF702P	19-53012909	Female	1
ENSG00000243701_DUBR	3-107251144	Female	1
ENSG00000243970_PPIEL	1-39546569	Male	1
ENSG00000244457_ENO1P1	1-236483559	Female	1
ENSG00000244457_ENO1P1	1-236483854	Female	1
ENSG00000244457_ENO1P1	1-236483980	Female	1
ENSG00000244457_ENO1P1	1-236483989	Female	1
ENSG00000244457_ENO1P1	1-236484040	Female	1
ENSG00000244457_ENO1P1	1-236484196	Male	1
ENSG00000244509_APOBEC3C	22-39019867	Male	1
ENSG00000244509_APOBEC3C	22-39019886	Male	1
ENSG00000244509_APOBEC3C	22-39019906	Female	1
ENSG00000244509_APOBEC3C	22-39019906	Male	1
ENSG00000244754_N4BP2L2	13-32515811	Female	1
ENSG00000244754_N4BP2L2	13-32524825	Female	1
ENSG00000244754_N4BP2L2	13-32524860	Male	1
ENSG00000244754_N4BP2L2	13-32525553	Female	1
ENSG00000244754_N4BP2L2	13-32525669	Male	1
ENSG00000245532_NEAT1	11-65440055	Female	1
ENSG00000246985_SOCS2-AS1	12-93542929	Female	1
ENSG00000247077_PGAM5	12-132721380	Female	1
ENSG00000247077_PGAM5	12-132721831	Male	1
ENSG00000247556_OIP5-AS1	15-41299144	Male	1
ENSG00000247556_OIP5-AS1	15-41299253	Male	1
ENSG00000247556_OIP5-AS1	15-41302414	Female	1
ENSG00000249348_UGDH-AS1	4-39533027	Male	1
ENSG00000249348_UGDH-AS1	4-39533053	Female	1
ENSG00000249348_UGDH-AS1	4-39549358	Male	1
ENSG00000249348_UGDH-AS1	4-39549388	Female	1
ENSG00000249348_UGDH-AS1	4-39549388	Male	1
ENSG00000249348_UGDH-AS1	4-39549547	Male	1
ENSG00000249348_UGDH-AS1	4-39549559	Male	1
ENSG00000249592_PCGF3-AS1	4-780465	Male	1
ENSG00000249624_IFNAR2	21-33263899	Male	1
ENSG00000249624_IFNAR2	21-33263955	Male	1
ENSG00000249624_IFNAR2	21-33264783	Male	1
ENSG00000250021_ARPIN-AP3S2	15-89897250	Male	1
ENSG00000250021_ARPIN-AP3S2	15-89897322	Male	1
ENSG00000250021_ARPIN-AP3S2	15-89897328	Female	1
ENSG00000250021_ARPIN-AP3S2	15-89897355	Male	1
ENSG00000250021_ARPIN-AP3S2	15-89897363	Male	1
ENSG00000250021_ARPIN-AP3S2	15-89899302	Male	1
ENSG00000250021_ARPIN-AP3S2	15-89899312	Male	1
ENSG00000250021_ARPIN-AP3S2	15-89899317	Male	1
ENSG00000250021_ARPIN-AP3S2	15-89899357	Female	1
ENSG00000250021_ARPIN-AP3S2	15-89899374	Female	1
ENSG00000250151_ARPC4-TTLL3	3-9818486	Female	1
ENSG00000251669_FAM86EP	4-3948699	Male	1
ENSG00000253710_ALG11	13-52030810	Male	1
ENSG00000253797_UTP14C	13-52030810	Male	1
ENSG00000254064_PIWIL2-DT	8-22257418	Female	1
ENSG00000254860_TMEM9B-AS1	11-8972911	Female	1
ENSG00000254860_TMEM9B-AS1	11-8975599	Male	1
ENSG00000255262_ELOBP2	11-130032942	Female	1
ENSG00000255284_GATD1-DT	11-778290	Female	1
ENSG00000255284_GATD1-DT	11-778864	Male	1
ENSG00000255836_LOC100419928	12-7439562	Male	1
ENSG00000255836_LOC100419928	12-7439708	Male	1
ENSG00000255836_LOC100419928	12-7439728	Female	1
ENSG00000256060_TRAPPC2B	19-57364808	Female	1
ENSG00000256060_TRAPPC2B	19-57364842	Female	1
ENSG00000256087_ZNF432	19-52063423	Female	1
ENSG00000256087_ZNF432	19-52064706	Male	1
ENSG00000256087_ZNF432	19-52064730	Male	1
ENSG00000256087_ZNF432	19-52064762	Male	1
ENSG00000256087_ZNF432	19-52064837	Male	1
ENSG00000257218_GATC	12-120461272	Male	1
ENSG00000257790_EIF4A1P4	12-53153418	Male	1
ENSG00000258388_PPT2-EGFL8	6-32165663	Male	1
ENSG00000258388_PPT2-EGFL8	6-32165756	Male	1
ENSG00000258644_SYNJ2BP-COX16	14-70369354	Male	1
ENSG00000258839_MC1R	16-89917241	Female	1
ENSG00000259112_NDUFC2-KCTD14	11-78069071	Male	1
ENSG00000259240_MIR4713HG	15-51273968	Male	1
ENSG00000259948_LOC124903574	15-89201430	Male	1
ENSG00000259948_LOC124903574	15-89201452	Male	1
ENSG00000259948_LOC124903574	15-89201741	Male	1
ENSG00000260852_FBXL19-AS1	16-30920491	Male	1
ENSG00000260852_FBXL19-AS1	16-30921378	Female	1
ENSG00000261371_PECAM1	17-64321540	Male	1
ENSG00000261371_PECAM1	17-64322264	Female	1
ENSG00000262454_MIR193BHG	16-14327036	Male	1
ENSG00000262454_MIR193BHG	16-14327046	Female	1
ENSG00000262454_MIR193BHG	16-14327046	Male	1
ENSG00000262454_MIR193BHG	16-14327150	Male	1
ENSG00000262454_MIR193BHG	16-14327589	Female	1
ENSG00000262454_MIR193BHG	16-14327822	Female	1
ENSG00000262454_MIR193BHG	16-14327822	Male	1
ENSG00000262454_MIR193BHG	16-14329123	Male	1
ENSG00000262454_MIR193BHG	16-14329130	Male	1
ENSG00000262454_MIR193BHG	16-14329361	Female	1
ENSG00000263001_GTF2I	7-74685311	Male	1
ENSG00000263001_GTF2I	7-74686992	Male	1
ENSG00000263001_GTF2I	7-74687073	Male	1
ENSG00000265241_RBM8A	1-145921979	Male	1
ENSG00000265241_RBM8A	1-145921980	Female	1
ENSG00000265241_RBM8A	1-145922969	Male	1
ENSG00000265241_RBM8A	1-145923014	Female	1
ENSG00000265491_RNF115	1-145745486	Male	1
ENSG00000265491_RNF115	1-145745519	Male	1
ENSG00000265491_RNF115	1-145745521	Male	1
ENSG00000265491_RNF115	1-145746037	Female	1
ENSG00000267121_FMNL1-DT	17-45217282	Male	1
ENSG00000267121_FMNL1-DT	17-45217352	Male	1
ENSG00000267121_FMNL1-DT	17-45218075	Female	1
ENSG00000267858_MZF1-AS1	19-58568046	Male	1
ENSG00000269343_ZNF587B	19-57844380	Female	1
ENSG00000269343_ZNF587B	19-57844380	Male	1
ENSG00000270647_TAF15	17-35827293	Male	1
ENSG00000271723_MROH7-TTC4	1-54647541	Male	1
ENSG00000274810_NPHP3-ACAD11	3-132678840	Female	1
ENSG00000274810_NPHP3-ACAD11	3-132678859	Female	1
ENSG00000275066_SYNRG	17-37515696	Female	1
ENSG00000275066_SYNRG	17-37515696	Male	1
ENSG00000275066_SYNRG	17-37517003	Male	1
ENSG00000275066_SYNRG	17-37517042	Female	1
ENSG00000275066_SYNRG	17-37517052	Male	1
ENSG00000276234_TADA2A	17-37477647	Female	1
ENSG00000276234_TADA2A	17-37477732	Female	1
ENSG00000276234_TADA2A	17-37477732	Male	1
ENSG00000282826_FRG1CP	20-28582327	Male	1
ENSG00000284308_C2orf81	2-74418365	Female	1
ENSG00000285458_C4orf36	4-86914237	Male	1
ENSG00000285458_C4orf36	4-86914805	Female	1
ENSG00000285991_RAET1E	6-149820961	Male	1
ENSG00000285991_RAET1E	6-149821134	Male	1
ENSG00000285991_RAET1E	6-149821202	Female	1
ENSG00000285991_RAET1E	6-149822258	Female	1
ENSG00000285991_RAET1E	6-149822299	Male	1
ENSG00000285991_RAET1E	6-149822318	Male	1
ENSG00000285991_RAET1E	6-149824694	Female	1
ENSG00000285991_RAET1E	6-149825758	Female	1
ENSG00000285991_RAET1E	6-149825813	Male	1
ENSG00000285991_RAET1E	6-149825900	Male	1
ENSG00000286070_GGT1	22-24573003	Male	1
ENSG00000286070_GGT1	22-24573015	Male	1
ENSG00000286070_GGT1	22-24573832	Male	1
[truncated: 3 more rows]

## Sheet: 5
Supplementary table 5. The number of differential editing sites per gene in Human male infant placental tissue
Gene	Count of differential sites
ENSG00000177225_GATD1	13
ENSG00000160049_DFFA	12
ENSG00000023228_NDUFS1	11
ENSG00000088888_MAVS	11
ENSG00000116199_FAM20B	11
ENSG00000162441_LZIC	11
ENSG00000126775_ATG14	10
ENSG00000130119_GNL3L	10
ENSG00000178974_FBXO34	10
ENSG00000127526_SLC35E1	9
ENSG00000128346_C22orf23	9
ENSG00000105372_RPS19	8
ENSG00000139631_CSAD	8
ENSG00000186001_LRCH3	8
ENSG00000224287_MSL3P1	8
ENSG00000242498_ARPIN	8
ENSG00000250021_ARPIN-AP3S2	8
ENSG00000105492_SIGLEC6	7
ENSG00000115084_SLC35F5	7
ENSG00000120256_LRP11	7
ENSG00000124541_RRP36	7
ENSG00000126067_PSMB2	7
ENSG00000126214_KLC1	7
ENSG00000136731_UGGT1	7
ENSG00000163131_CTSS	7
ENSG00000204138_PHACTR4	7
ENSG00000285991_RAET1E	7
ENSG00000010704_HFE	6
ENSG00000059804_SLC2A3	6
ENSG00000105968_H2AZ2	6
ENSG00000119616_FCF1	6
ENSG00000123178_SPRYD7	6
ENSG00000138594_LOC112268148	6
ENSG00000138594_TMOD3	6
ENSG00000156162_DPY19L4	6
ENSG00000160194_NDUFV3	6
ENSG00000160439_RDH13	6
ENSG00000164902_PHAX	6
ENSG00000168575_SLC20A2	6
ENSG00000169567_HINT1	6
ENSG00000180596_H2BC4	6
ENSG00000196968_FUT11	6
ENSG00000240053_LY6G5B	6
ENSG00000262454_MIR193BHG	6
ENSG00000060339_CCAR1	5
ENSG00000072864_NDE1	5
ENSG00000099910_KLHL22	5
ENSG00000101294_HM13	5
ENSG00000101898_MCTS2	5
ENSG00000102910_LONP2	5
ENSG00000104881_PPP1R13L	5
ENSG00000110090_CPT1A	5
ENSG00000117335_CD46	5
ENSG00000127054_INTS11	5
ENSG00000127463_EMC1	5
ENSG00000138600_SPPL2A	5
ENSG00000140526_ABHD2	5
ENSG00000144791_LIMD1	5
ENSG00000186687_LYRM7	5
ENSG00000213853_EMP2	5
ENSG00000221963_APOL6	5
ENSG00000230424_EMC1-AS1	5
ENSG00000249348_UGDH-AS1	5
ENSG00000037757_MRI1	4
ENSG00000075415_SLC25A3	4
ENSG00000100522_GNPNAT1	4
ENSG00000103510_KAT8	4
ENSG00000113621_TXNDC15	4
ENSG00000116580_GON4L	4
ENSG00000124440_HIF3A	4
ENSG00000129472_RAB2B	4
ENSG00000129566_TEP1	4
ENSG00000136068_FLNB	4
ENSG00000142166_IFNAR1	4
ENSG00000145029_NICN1	4
ENSG00000159708_LRRC36	4
ENSG00000163466_ARPC2	4
ENSG00000163683_SMIM14	4
ENSG00000163807_KIAA1143	4
ENSG00000166295_ANAPC16	4
ENSG00000166441_RPL27A	4
ENSG00000166822_TMEM170A	4
ENSG00000167766_ZNF83	4
ENSG00000168172_HOOK3	4
ENSG00000171121_KCNMB3	4
ENSG00000183696_UPP1	4
ENSG00000185527_PDE6G	4
ENSG00000186166_CENATAC	4
ENSG00000197608_ZNF841	4
ENSG00000197756_RPL37A	4
ENSG00000198625_MDM4	4
ENSG00000213753_CENPBD2P	4
ENSG00000213753_RPL23AP79	4
ENSG00000256087_ZNF432	4
ENSG00000006715_VPS41	3
ENSG00000018869_ZNF582	3
ENSG00000055332_EIF2AK2	3
ENSG00000064012_CASP8	3
ENSG00000064601_CTSA	3
ENSG00000087269_NOP14	3
ENSG00000100028_SNRPD3	3
ENSG00000100478_AP4S1	3
ENSG00000102755_FLT1	3
ENSG00000109381_ELF2	3
ENSG00000111450_STX2	3
ENSG00000114126_TFDP2	3
ENSG00000122705_CLTA	3
ENSG00000123130_ACOT9	3
ENSG00000127804_METTL16	3
ENSG00000128050_PAICS	3
ENSG00000130176_CNN1	3
ENSG00000134086_VHL	3
ENSG00000134152_KATNBL1	3
ENSG00000134297_PLEKHA8P1	3
ENSG00000140398_NEIL1	3
ENSG00000141568_FOXK2	3
ENSG00000143742_SRP9	3
ENSG00000148153_INIP	3
ENSG00000149639_SOGA1	3
ENSG00000151923_TIAL1	3
ENSG00000158769_F11R	3
ENSG00000159110_IFNAR2	3
ENSG00000159921_GNE	3
ENSG00000162378_ZYG11B	3
ENSG00000162390_ACOT11	3
ENSG00000162813_BPNT1	3
ENSG00000163249_CCNYL1	3
ENSG00000163626_COX18	3
ENSG00000163882_POLR2H	3
ENSG00000164733_CTSB	3
ENSG00000164808_SPIDR	3
ENSG00000170946_DNAJC24	3
ENSG00000171862_PTEN	3
ENSG00000173214_MFSD4B	3
ENSG00000182180_MRPS16	3
ENSG00000182963_GJC1	3
ENSG00000182986_ZNF320	3
ENSG00000189339_SLC35E2B	3
ENSG00000197170_PSMD12	3
ENSG00000197429_IPP	3
ENSG00000236756_DNAJC9-AS1	3
ENSG00000244509_APOBEC3C	3
ENSG00000249624_IFNAR2	3
ENSG00000259948_LOC124903574	3
ENSG00000263001_GTF2I	3
ENSG00000265491_RNF115	3
ENSG00000275066_SYNRG	3
ENSG00000286070_GGT1	3
ENSG00000003756_RBM5	2
ENSG00000006756_ARSD	2
ENSG00000008294_SPAG9	2
ENSG00000018610_STEEP1	2
ENSG00000023608_SNAPC1	2
ENSG00000053372_MRTO4	2
ENSG00000068028_RASSF1	2
ENSG00000071655_MBD3	2
ENSG00000073008_PVR	2
ENSG00000076067_RBMS2	2
ENSG00000077721_UBE2A	2
ENSG00000088448_ANKRD10	2
ENSG00000100226_GTPBP1	2
ENSG00000100342_APOL1	2
ENSG00000100418_DESI1	2
ENSG00000101109_STK4	2
ENSG00000101335_MYL9	2
ENSG00000103496_STX4	2
ENSG00000106546_AHR	2
ENSG00000111237_VPS29	2
ENSG00000115486_GGCX	2
ENSG00000116237_ICMT	2
ENSG00000118579_MED28	2
ENSG00000120253_NUP43	2
ENSG00000120594_PLXDC2	2
ENSG00000120948_TARDBP	2
ENSG00000122912_SLC25A16	2
ENSG00000123144_TRIR	2
ENSG00000123159_GIPC1	2
ENSG00000124208_PEDS1-UBE2V1	2
ENSG00000125375_DMAC2L	2
ENSG00000129250_KIF1C	2
ENSG00000129474_AJUBA	2
ENSG00000131381_RBSN	2
ENSG00000132780_NASP	2
ENSG00000133028_SCO1	2
ENSG00000135678_CPM	2
ENSG00000135842_NIBAN1	2
ENSG00000135917_SLC19A3	2
ENSG00000136699_SMPD4	2
ENSG00000140199_SLC12A6	2
ENSG00000140749_IGSF6	2
ENSG00000141569_TRIM65	2
ENSG00000141580_WDR45B	2
ENSG00000144320_LNPK	2
ENSG00000145819_ARHGAP26	2
ENSG00000146223_RPL7L1	2
ENSG00000146576_INTS15	2
ENSG00000146828_SLC12A9	2
ENSG00000149311_ATM	2
ENSG00000152104_PTPN14	2
ENSG00000152291_TGOLN2	2
ENSG00000154079_SDHAF4	2
ENSG00000156482_RPL30	2
ENSG00000158270_COLEC12	2
ENSG00000160294_MCM3AP	2
ENSG00000161091_MFSD12	2
ENSG00000162654_GBP4	2
ENSG00000163812_ZDHHC3	2
ENSG00000165055_METTL2B	2
ENSG00000166199_ALKBH3	2
ENSG00000166323_C11orf65	2
ENSG00000168056_LTBP3	2
ENSG00000168883_USP39	2
ENSG00000168887_C2orf68	2
ENSG00000169231_THBS3	2
ENSG00000169895_SYAP1	2
ENSG00000170190_SLC16A5	2
ENSG00000171451_DSEL	2
ENSG00000172888_ZNF621	2
ENSG00000173821_RNF213	2
ENSG00000174989_FBXW8	2
ENSG00000177675_CD163L1	2
ENSG00000180758_GPR157	2
ENSG00000180776_ZDHHC20	2
ENSG00000182768_NGRN	2
ENSG00000183171_LOC643015	2
ENSG00000183323_CCDC125	2
ENSG00000183397_TEKTIP1	2
ENSG00000185324_CDK10	2
ENSG00000185414_MRPL30	2
ENSG00000185432_METTL7A	2
ENSG00000186197_EDARADD	2
ENSG00000186567_CEACAM19	2
ENSG00000186812_ZNF397	2
ENSG00000188676_IDO2	2
ENSG00000196262_PPIA	2
ENSG00000196705_ZNF431	2
ENSG00000197006_METTL9	2
ENSG00000197070_ARRDC1	2
ENSG00000198408_OGA	2
ENSG00000198466_ZNF587	2
ENSG00000204514_ZNF814	2
ENSG00000204574_ABCF1	2
ENSG00000205758_CRYZL1	2
ENSG00000211451_GNRHR2	2
ENSG00000213225_NOC2LP1	2
ENSG00000213468_FIRRE	2
ENSG00000213693_SEC14L1P1	2
ENSG00000214078_CPNE1	2
ENSG00000225733_FGD5-AS1	2
ENSG00000230445_LRRC37A6P	2
ENSG00000231064_THBS3-AS1	2
ENSG00000231312_MAP4K3-DT	2
ENSG00000232907_DLGAP4-AS1	2
ENSG00000235703_EOLA2-DT	2
ENSG00000240849_PEDS1	2
ENSG00000241404_EGFL8	2
ENSG00000244754_N4BP2L2	2
ENSG00000247077_PGAM5	2
ENSG00000247556_OIP5-AS1	2
ENSG00000255836_LOC100419928	2
ENSG00000258388_PPT2-EGFL8	2
ENSG00000265241_RBM8A	2
ENSG00000267121_FMNL1-DT	2
ENSG00000285458_C4orf36	2
ENSG00000002586_CD99	1
ENSG00000003400_CASP10	1
ENSG00000003402_CFLAR	1
ENSG00000020922_MRE11	1
ENSG00000022556_NLRP2	1
ENSG00000050393_MCUR1	1
ENSG00000050405_LIMA1	1
ENSG00000051620_HEBP2	1
ENSG00000052344_PRSS8	1
ENSG00000057252_SOAT1	1
ENSG00000060982_BCAT1	1
ENSG00000068323_TFE3	1
ENSG00000070540_WIPI1	1
ENSG00000072135_PTPN18	1
ENSG00000073169_SELENOO	1
ENSG00000073605_GSDMB	1
ENSG00000074356_NCBP3	1
ENSG00000075790_BCAP29	1
ENSG00000079332_SAR1A	1
ENSG00000083099_LYRM2	1
ENSG00000083828_ZNF586	1
ENSG00000084623_EIF3I	1
ENSG00000087157_PGS1	1
ENSG00000087266_SH3BP2	1
ENSG00000089050_RBBP9	1
ENSG00000089053_ANAPC5	1
ENSG00000090615_GOLGA3	1
ENSG00000090924_PLEKHG2	1
ENSG00000091986_CCDC80	1
ENSG00000095485_CWF19L1	1
ENSG00000095637_SORBS1	1
ENSG00000099326_MZF1	1
ENSG00000099795_NDUFB7	1
ENSG00000099917_MED15	1
ENSG00000099940_SNAP29	1
ENSG00000100036_SLC35E4	1
ENSG00000100077_GRK3	1
ENSG00000100138_SNU13	1
ENSG00000100234_TIMP3	1
ENSG00000100299_ARSA	1
ENSG00000100490_CDKL1	1
ENSG00000101236_RNF24	1
ENSG00000101440_ASIP	1
ENSG00000101966_XIAP	1
ENSG00000102158_MAGT1	1
ENSG00000102317_RBM3	1
ENSG00000103199_ZNF500	1
ENSG00000103319_EEF2K	1
ENSG00000103365_GGA2	1
ENSG00000104529_EEF1D	1
ENSG00000104687_GSR	1
ENSG00000104738_MCM4	1
ENSG00000105397_TYK2	1
ENSG00000106077_ABHD11	1
ENSG00000107816_LZTS2	1
ENSG00000107862_GBF1	1
ENSG00000108405_P2RX1	1
ENSG00000108509_CAMTA2	1
ENSG00000109046_WSB1	1
ENSG00000110696_C11orf58	1
ENSG00000111358_GTF2H3	1
ENSG00000113569_NUP155	1
ENSG00000114302_PRKAR2A	1
ENSG00000114450_GNB4	1
ENSG00000114850_SSR3	1
ENSG00000115266_APC2	1
ENSG00000115414_FN1	1
ENSG00000115468_EFHD1	1
ENSG00000117620_SLC35A3	1
ENSG00000117868_ESYT2	1
ENSG00000118197_DDX59	1
ENSG00000119004_CYP20A1	1
ENSG00000119392_GLE1	1
ENSG00000119535_CSF3R	1
ENSG00000119812_FAM98A	1
ENSG00000119812_RASGRP3-AS1	1
ENSG00000119899_SLC17A5	1
ENSG00000121289_CEP89	1
ENSG00000123154_WDR83	1
ENSG00000123505_AMD1	1
ENSG00000124104_SNX21	1
ENSG00000125741_OPA3	1
ENSG00000125779_PANK2	1
ENSG00000126005_MMP24OS	1
ENSG00000126602_TRAP1	1
ENSG00000127472_PLA2G5	1
ENSG00000127483_HP1BP3	1
ENSG00000127511_SIN3B	1
ENSG00000129128_SPCS3	1
ENSG00000129625_REEP5	1
ENSG00000130175_PRKCSH	1
ENSG00000130177_CDC16	1
ENSG00000130517_PGPEP1	1
ENSG00000130713_EXOSC2	1
ENSG00000130772_MED18	1
ENSG00000130822_PNCK	1
ENSG00000131981_LGALS3	1
ENSG00000132676_DAP3	1
ENSG00000133114_GPALPP1	1
ENSG00000133275_CSNK1G2	1
ENSG00000133983_COX16	1
ENSG00000134490_TMEM241	1
ENSG00000135245_HILPDA	1
ENSG00000137054_POLR1E	1
ENSG00000137413_TAF8	1
ENSG00000137713_PPP2R1B	1
ENSG00000137869_CYP19A1	1
ENSG00000139291_TMEM19	1
ENSG00000139329_LUM	1
ENSG00000140092_FBLN5	1
ENSG00000140105_WARS1	1
ENSG00000140374_ETFA	1
ENSG00000140497_SCAMP2	1
ENSG00000140750_ARHGAP17	1
ENSG00000142751_GPN2	1
ENSG00000142765_SYTL1	1
ENSG00000142864_SERBP1	1
ENSG00000144231_POLR2D	1
ENSG00000145416_MARCHF1	1
ENSG00000147576_ADHFE1	1
ENSG00000147649_MTDH	1
ENSG00000148090_AUH	1
ENSG00000149182_ARFGAP2	1
ENSG00000150455_TIRAP	1
ENSG00000150938_CRIM1	1
ENSG00000151176_PLBD2	1
ENSG00000151366_NDUFC2	1
ENSG00000152056_AP1S3	1
ENSG00000153037_SRP19	1
ENSG00000154122_ANKH	1
ENSG00000155008_APOOL	1
ENSG00000155269_GPR78	1
ENSG00000155393_HEATR3	1
ENSG00000155850_SLC26A2	1
ENSG00000155974_GRIP1	1
ENSG00000157625_TAB3	1
ENSG00000157637_SLC38A10	1
ENSG00000160209_PDXK	1
ENSG00000160691_SHC1	1
ENSG00000160953_PWWP3A	1
ENSG00000161011_SQSTM1	1
ENSG00000161533_ACOX1	1
ENSG00000162222_TTC9C	1
ENSG00000162408_NOL9	1
ENSG00000162928_PEX13	1
ENSG00000163257_DCAF16	1
ENSG00000163633_C4orf36	1
ENSG00000163719_MTMR14	1
ENSG00000165959_CLMN	1
ENSG00000166250_CLMP	1
ENSG00000166451_CENPN	1
ENSG00000166855_CLPX	1
ENSG00000167065_DUSP18	1
ENSG00000167113_COQ4	1
ENSG00000167123_CERCAM	1
ENSG00000167244_IGF2	1
ENSG00000167595_PROSER3	1
ENSG00000167657_DAPK3	1
ENSG00000167703_SLC43A2	1
ENSG00000168389_MFSD2A	1
ENSG00000168542_COL3A1	1
ENSG00000168807_SNTB2	1
ENSG00000169062_UPF3A	1
ENSG00000169239_CA5B	1
ENSG00000169282_KCNAB1	1
ENSG00000169495_HTRA4	1
ENSG00000169499_PLEKHA2	1
ENSG00000169905_TOR1AIP2	1
ENSG00000170088_TMEM192	1
ENSG00000170145_SIK2	1
ENSG00000172006_ZNF554	1
ENSG00000172775_PSME3IP1	1
ENSG00000172824_CES4A	1
ENSG00000172840_PDP2	1
ENSG00000173083_HPSE	1
ENSG00000173480_ZNF417	1
ENSG00000173614_NMNAT1	1
ENSG00000174839_DENND6A	1
ENSG00000174945_AMZ1	1
ENSG00000175352_NRIP3	1
ENSG00000175414_ARL10	1
ENSG00000176014_TUBB6	1
ENSG00000176720_BOK	1
ENSG00000177082_WDR73	1
ENSG00000177363_LRRN4CL	1
ENSG00000177425_PAWR	1
ENSG00000177663_IL17RA	1
ENSG00000177932_ZNF354C	1
ENSG00000179913_B3GNT3	1
ENSG00000180228_PRKRA	1
ENSG00000180902_D2HGDH	1
ENSG00000181894_ZNF329	1
ENSG00000182141_ZNF708	1
ENSG00000182240_BACE2	1
ENSG00000182534_MXRA7	1
ENSG00000182752_PAPPA	1
ENSG00000182796_TMEM198B	1
ENSG00000182831_HAPSTR1	1
ENSG00000183597_TANGO2	1
ENSG00000184313_MROH7	1
ENSG00000184992_BRI3BP	1
ENSG00000185561_TLCD2	1
ENSG00000185666_SYN3	1
ENSG00000185684_EP400P1	1
ENSG00000185880_TRIM69	1
ENSG00000186532_SMYD4	1
ENSG00000186716_BCR	1
ENSG00000188112_C6orf132	1
ENSG00000188770_OPTC	1
ENSG00000188846_RPL14	1
ENSG00000189144_ZNF573	1
ENSG00000196878_LAMB3	1
ENSG00000197321_SVIL	1
ENSG00000197343_ZNF655	1
ENSG00000197555_SIPA1L1	1
ENSG00000197912_LOC101930112	1
ENSG00000197912_SPG7	1
ENSG00000198001_IRAK4	1
ENSG00000198089_SFI1	1
ENSG00000204219_TCEA3	1
ENSG00000204252_HLA-DOA	1
ENSG00000206538_VGLL3	1
ENSG00000208005_MIR503	1
ENSG00000212643_ZRSR2P1	1
ENSG00000213064_SFT2D2	1
ENSG00000213463_SYNJ2BP	1
ENSG00000213918_DNASE1	1
ENSG00000214046_SMIM7	1
ENSG00000214548_MEG3	1
ENSG00000215769_ARHGAP27P1-BPTFP1-KPNA2P3	1
ENSG00000223496_EXOSC6	1
ENSG00000223960_CHROMR	1
ENSG00000224536_CSRP1-AS1	1
ENSG00000224892_RPS4XP16	1
ENSG00000228205_RPS3P3	1
ENSG00000228451_SDAD1P1	1
ENSG00000229230_MT1P3	1
ENSG00000229847_EMX2OS	1
ENSG00000230590_FTX	1
ENSG00000230701_FBXW4P1	1
ENSG00000230870_FBXW11P1	1
ENSG00000233006_MIR3936HG	1
ENSG00000233369_GTF2IP4	1
ENSG00000236778_INTS6-AS1	1
ENSG00000242779_ZNF702P	1
ENSG00000243970_PPIEL	1
ENSG00000244457_ENO1P1	1
ENSG00000249592_PCGF3-AS1	1
ENSG00000251669_FAM86EP	1
ENSG00000253710_ALG11	1
ENSG00000253797_UTP14C	1
ENSG00000254860_TMEM9B-AS1	1
ENSG00000255284_GATD1-DT	1
ENSG00000257218_GATC	1
ENSG00000257790_EIF4A1P4	1
ENSG00000258644_SYNJ2BP-COX16	1
ENSG00000259112_NDUFC2-KCTD14	1
ENSG00000259240_MIR4713HG	1
ENSG00000260852_FBXL19-AS1	1
ENSG00000261371_PECAM1	1
ENSG00000267858_MZF1-AS1	1
ENSG00000269343_ZNF587B	1
ENSG00000270647_TAF15	1
ENSG00000271723_MROH7-TTC4	1
ENSG00000276234_TADA2A	1
ENSG00000282826_FRG1CP	1
ENSG00000289586_LOC105377294	1

## Sheet: 6
Supplementary table 6. The number of differential editing sites per gene in Human female infant placental tissue
Gene	Count of differential sites
ENSG00000138600_SPPL2A	14
ENSG00000127054_INTS11	9
ENSG00000130119_GNL3L	7
ENSG00000140749_IGSF6	7
ENSG00000197006_METTL9	7
ENSG00000213853_EMP2	7
ENSG00000010704_HFE	6
ENSG00000101109_STK4	6
ENSG00000160209_PDXK	6
ENSG00000166295_ANAPC16	6
ENSG00000180596_H2BC4	6
ENSG00000182963_GJC1	6
ENSG00000186166_CENATAC	6
ENSG00000186197_EDARADD	6
ENSG00000204138_PHACTR4	6
ENSG00000204514_ZNF814	6
ENSG00000244457_ENO1P1	6
ENSG00000104881_PPP1R13L	5
ENSG00000115084_SLC35F5	5
ENSG00000145029_NICN1	5
ENSG00000151923_TIAL1	5
ENSG00000185324_CDK10	5
ENSG00000213225_NOC2LP1	5
ENSG00000224287_MSL3P1	5
ENSG00000088448_ANKRD10	4
ENSG00000088888_MAVS	4
ENSG00000101335_MYL9	4
ENSG00000102755_FLT1	4
ENSG00000103510_KAT8	4
ENSG00000117335_CD46	4
ENSG00000119820_YIPF4	4
ENSG00000120256_LRP11	4
ENSG00000136731_UGGT1	4
ENSG00000139631_CSAD	4
ENSG00000140105_WARS1	4
ENSG00000143742_SRP9	4
ENSG00000160439_RDH13	4
ENSG00000167113_COQ4	4
ENSG00000167460_TPM4	4
ENSG00000177225_GATD1	4
ENSG00000182796_TMEM198B	4
ENSG00000183171_LOC643015	4
ENSG00000196968_FUT11	4
ENSG00000198466_ZNF587	4
ENSG00000214046_SMIM7	4
ENSG00000232907_DLGAP4-AS1	4
ENSG00000235703_EOLA2-DT	4
ENSG00000262454_MIR193BHG	4
ENSG00000285991_RAET1E	4
ENSG00000022556_NLRP2	3
ENSG00000059804_SLC2A3	3
ENSG00000104687_GSR	3
ENSG00000105968_H2AZ2	3
ENSG00000114316_USP4	3
ENSG00000119004_CYP20A1	3
ENSG00000124541_RRP36	3
ENSG00000128346_C22orf23	3
ENSG00000134297_PLEKHA8P1	3
ENSG00000154079_SDHAF4	3
ENSG00000160049_DFFA	3
ENSG00000160194_NDUFV3	3
ENSG00000162441_LZIC	3
ENSG00000164828_SUN1	3
ENSG00000167595_PROSER3	3
ENSG00000167766_ZNF83	3
ENSG00000173214_MFSD4B	3
ENSG00000182378_PLCXD1	3
ENSG00000197429_IPP	3
ENSG00000197756_RPL37A	3
ENSG00000230590_FTX	3
ENSG00000239857_GET4	3
ENSG00000240053_LY6G5B	3
ENSG00000242498_ARPIN	3
ENSG00000244754_N4BP2L2	3
ENSG00000250021_ARPIN-AP3S2	3
ENSG00000006715_VPS41	2
ENSG00000018610_STEEP1	2
ENSG00000023228_NDUFS1	2
ENSG00000055332_EIF2AK2	2
ENSG00000060339_CCAR1	2
ENSG00000075415_SLC25A3	2
ENSG00000077721_UBE2A	2
ENSG00000081307_UBA5	2
ENSG00000089053_ANAPC5	2
ENSG00000095485_CWF19L1	2
ENSG00000100028_SNRPD3	2
ENSG00000100522_GNPNAT1	2
ENSG00000102317_RBM3	2
ENSG00000102910_LONP2	2
ENSG00000104738_MCM4	2
ENSG00000104957_YJU2B	2
ENSG00000105372_RPS19	2
ENSG00000114054_PCCB	2
ENSG00000114126_TFDP2	2
ENSG00000114450_GNB4	2
ENSG00000114850_SSR3	2
ENSG00000116199_FAM20B	2
ENSG00000117242_PINK1-AS	2
ENSG00000120594_PLXDC2	2
ENSG00000122705_CLTA	2
ENSG00000122912_SLC25A16	2
ENSG00000123154_WDR83	2
ENSG00000123178_SPRYD7	2
ENSG00000124104_SNX21	2
ENSG00000125912_NCLN	2
ENSG00000126214_KLC1	2
ENSG00000127463_EMC1	2
ENSG00000130517_PGPEP1	2
ENSG00000131381_RBSN	2
ENSG00000132199_ENOSF1	2
ENSG00000132698_RAB25	2
ENSG00000134086_VHL	2
ENSG00000136699_SMPD4	2
ENSG00000137460_FHDC1	2
ENSG00000138594_LOC112268148	2
ENSG00000138594_TMOD3	2
ENSG00000140199_SLC12A6	2
ENSG00000144791_LIMD1	2
ENSG00000146828_SLC12A9	2
ENSG00000147649_MTDH	2
ENSG00000149639_SOGA1	2
ENSG00000152433_ZNF547	2
ENSG00000155393_HEATR3	2
ENSG00000156162_DPY19L4	2
ENSG00000158828_PINK1	2
ENSG00000159921_GNE	2
ENSG00000161091_MFSD12	2
ENSG00000162378_ZYG11B	2
ENSG00000162928_PEX13	2
ENSG00000163131_CTSS	2
ENSG00000163249_CCNYL1	2
ENSG00000163257_DCAF16	2
ENSG00000163466_ARPC2	2
ENSG00000163882_POLR2H	2
ENSG00000166012_TAF1D	2
ENSG00000166822_TMEM170A	2
ENSG00000168172_HOOK3	2
ENSG00000168724_DNAJC21	2
ENSG00000169062_UPF3A	2
ENSG00000169567_HINT1	2
ENSG00000169609_C15orf40	2
ENSG00000170088_TMEM192	2
ENSG00000170190_SLC16A5	2
ENSG00000173821_RNF213	2
ENSG00000175538_KCNE3	2
ENSG00000176953_NFATC2IP	2
ENSG00000177675_CD163L1	2
ENSG00000182240_BACE2	2
ENSG00000183397_TEKTIP1	2
ENSG00000183696_UPP1	2
ENSG00000184988_TMEM106A	2
ENSG00000186687_LYRM7	2
ENSG00000188676_IDO2	2
ENSG00000188735_TMEM120B	2
ENSG00000189339_SLC35E2B	2
ENSG00000196705_ZNF431	2
ENSG00000197170_PSMD12	2
ENSG00000197343_ZNF655	2
ENSG00000198408_OGA	2
ENSG00000198796_ALPK2	2
ENSG00000205758_CRYZL1	2
ENSG00000211451_GNRHR2	2
ENSG00000213468_FIRRE	2
ENSG00000228716_DHFR	2
ENSG00000230424_EMC1-AS1	2
ENSG00000236383_CCDC200	2
ENSG00000242779_ZNF702P	2
ENSG00000249348_UGDH-AS1	2
ENSG00000255836_LOC100419928	2
ENSG00000256060_TRAPPC2B	2
ENSG00000265241_RBM8A	2
ENSG00000274810_NPHP3-ACAD11	2
ENSG00000275066_SYNRG	2
ENSG00000276234_TADA2A	2
ENSG00000286070_GGT1	2
ENSG00000001630_CYP51A1	1
ENSG00000003400_CASP10	1
ENSG00000006756_ARSD	1
ENSG00000011275_RNF216	1
ENSG00000011465_DCN	1
ENSG00000011478_QPCTL	1
ENSG00000013441_CLK1	1
ENSG00000018869_ZNF582	1
ENSG00000029725_RABEP1	1
ENSG00000037757_MRI1	1
ENSG00000050393_MCUR1	1
ENSG00000050405_LIMA1	1
ENSG00000064601_CTSA	1
ENSG00000067606_PRKCZ	1
ENSG00000068831_RASGRP2	1
ENSG00000070404_FSTL3	1
ENSG00000070540_WIPI1	1
ENSG00000073060_SCARB1	1
ENSG00000073605_GSDMB	1
ENSG00000074842_MYDGF	1
ENSG00000078124_ACER3	1
ENSG00000078699_CBFA2T2	1
ENSG00000079819_EPB41L2	1
ENSG00000081870_HSPB11	1
ENSG00000086061_DNAJA1	1
ENSG00000087157_PGS1	1
ENSG00000090581_GNPTG	1
ENSG00000090615_GOLGA3	1
ENSG00000091592_NLRP1	1
ENSG00000099246_RAB18	1
ENSG00000099917_MED15	1
ENSG00000100239_PPP6R2	1
ENSG00000100299_ARSA	1
ENSG00000100342_APOL1	1
ENSG00000100418_DESI1	1
ENSG00000100490_CDKL1	1
ENSG00000101294_HM13	1
ENSG00000101473_ACOT8	1
ENSG00000101695_RNF125	1
ENSG00000101898_MCTS2	1
ENSG00000101966_XIAP	1
ENSG00000102901_CENPT	1
ENSG00000103496_STX4	1
ENSG00000104415_CCN4	1
ENSG00000104872_PIH1D1	1
ENSG00000105397_TYK2	1
ENSG00000105492_SIGLEC6	1
ENSG00000105700_KXD1	1
ENSG00000106615_RHEB	1
ENSG00000107779_BMPR1A	1
ENSG00000108559_NUP88	1
ENSG00000108666_C17orf75	1
ENSG00000109046_WSB1	1
ENSG00000109381_ELF2	1
ENSG00000110063_DCPS	1
ENSG00000110090_CPT1A	1
ENSG00000110696_C11orf58	1
ENSG00000111231_GPN3	1
ENSG00000113569_NUP155	1
ENSG00000113621_TXNDC15	1
ENSG00000114302_PRKAR2A	1
ENSG00000115486_GGCX	1
ENSG00000115977_AAK1	1
ENSG00000116183_PAPPA2	1
ENSG00000116198_CEP104	1
ENSG00000116237_ICMT	1
ENSG00000116729_WLS	1
ENSG00000117899_MESD	1
ENSG00000119616_FCF1	1
ENSG00000120784_ZFP30	1
ENSG00000123144_TRIR	1
ENSG00000124208_PEDS1-UBE2V1	1
ENSG00000124226_RNF114	1
ENSG00000124440_HIF3A	1
ENSG00000125375_DMAC2L	1
ENSG00000125733_TRIP10	1
ENSG00000125755_SYMPK	1
ENSG00000126067_PSMB2	1
ENSG00000126602_TRAP1	1
ENSG00000127526_SLC35E1	1
ENSG00000127914_AKAP9	1
ENSG00000128000_ZNF780B	1
ENSG00000128487_SPECC1	1
ENSG00000129128_SPCS3	1
ENSG00000129250_KIF1C	1
ENSG00000129472_RAB2B	1
ENSG00000129566_TEP1	1
ENSG00000130332_LSM7	1
ENSG00000130363_RSPH3	1
ENSG00000130822_PNCK	1
ENSG00000131149_GSE1	1
ENSG00000132470_ITGB4	1
ENSG00000132780_NASP	1
ENSG00000134245_WNT2B	1
ENSG00000135074_ADAM19	1
ENSG00000135164_DMTF1	1
ENSG00000136068_FLNB	1
ENSG00000137814_HAUS2	1
ENSG00000137944_KYAT3	1
ENSG00000138744_NAAA	1
ENSG00000139433_GLTP	1
ENSG00000140398_NEIL1	1
ENSG00000140859_KIFC3	1
ENSG00000142188_TMEM50B	1
ENSG00000142751_GPN2	1
ENSG00000142864_SERBP1	1
ENSG00000143398_PIP5K1A	1
ENSG00000143458_GABPB2	1
ENSG00000145819_ARHGAP26	1
ENSG00000147133_TAF1	1
ENSG00000147576_ADHFE1	1
ENSG00000149182_ARFGAP2	1
ENSG00000151208_DLG5	1
ENSG00000152104_PTPN14	1
ENSG00000153046_CDYL	1
ENSG00000153291_SLC25A27	1
ENSG00000154803_FLCN	1
ENSG00000155008_APOOL	1
ENSG00000155034_FBXL18	1
ENSG00000155269_GPR78	1
ENSG00000155850_SLC26A2	1
ENSG00000155858_LSM11	1
ENSG00000156711_MAPK13	1
ENSG00000157500_APPL1	1
ENSG00000157625_TAB3	1
ENSG00000157637_SLC38A10	1
ENSG00000157827_FMNL2	1
ENSG00000159128_IFNGR2	1
ENSG00000159231_CBR3	1
ENSG00000159708_LRRC36	1
ENSG00000160294_MCM3AP	1
ENSG00000162222_TTC9C	1
ENSG00000162654_GBP4	1
ENSG00000162813_BPNT1	1
ENSG00000163655_GMPS	1
ENSG00000163683_SMIM14	1
ENSG00000163807_KIAA1143	1
ENSG00000164116_GUCY1A1	1
ENSG00000164292_RHOBTB3	1
ENSG00000164902_PHAX	1
ENSG00000164944_VIRMA	1
ENSG00000166199_ALKBH3	1
ENSG00000166250_CLMP	1
ENSG00000166441_RPL27A	1
ENSG00000166471_TMEM41B	1
ENSG00000166839_ANKDD1A	1
ENSG00000167232_ZNF91	1
ENSG00000167657_DAPK3	1
ENSG00000168014_C2CD3	1
ENSG00000168389_MFSD2A	1
ENSG00000168575_SLC20A2	1
ENSG00000169231_THBS3	1
ENSG00000169756_LIMS1	1
ENSG00000170946_DNAJC24	1
ENSG00000171295_ZNF440	1
ENSG00000171475_WIPF2	1
ENSG00000171631_P2RY6	1
ENSG00000172493_AFF1	1
ENSG00000172775_PSME3IP1	1
ENSG00000173221_GLRX	1
ENSG00000173467_AGR3	1
ENSG00000173575_CHD2	1
ENSG00000173614_NMNAT1	1
ENSG00000173960_UBXN2A	1
ENSG00000174574_AKIRIN1	1
ENSG00000174839_DENND6A	1
ENSG00000174945_AMZ1	1
ENSG00000174989_FBXW8	1
ENSG00000175352_NRIP3	1
ENSG00000176014_TUBB6	1
ENSG00000177082_WDR73	1
ENSG00000178852_EFCAB13	1
ENSG00000180228_PRKRA	1
ENSG00000180758_GPR157	1
ENSG00000181513_ACBD4	1
ENSG00000182118_FAM89A	1
ENSG00000182141_ZNF708	1
ENSG00000182446_NPLOC4	1
ENSG00000182749_PAQR7	1
ENSG00000182752_PAPPA	1
ENSG00000182831_HAPSTR1	1
ENSG00000183255_PTTG1IP	1
ENSG00000183323_CCDC125	1
ENSG00000184575_XPOT	1
ENSG00000185158_LRRC37B	1
ENSG00000185361_TNFAIP8L1	1
ENSG00000185414_MRPL30	1
ENSG00000185561_TLCD2	1
ENSG00000185634_SHC4	1
ENSG00000185880_TRIM69	1
ENSG00000186001_LRCH3	1
ENSG00000186532_SMYD4	1
ENSG00000186716_BCR	1
ENSG00000186812_ZNF397	1
ENSG00000187650_VMAC	1
ENSG00000188917_TRMT2B	1
ENSG00000189320_FAM180A	1
ENSG00000196365_LONP1	1
ENSG00000196743_GM2A	1
ENSG00000198001_IRAK4	1
ENSG00000204128_C2orf72	1
ENSG00000204252_HLA-DOA	1
ENSG00000204592_HLA-E	1
ENSG00000205517_RGL3	1
ENSG00000213218_CSH2	1
ENSG00000213516_RBMXL1	1
ENSG00000213693_SEC14L1P1	1
ENSG00000213753_CENPBD2P	1
ENSG00000213753_RPL23AP79	1
ENSG00000213918_DNASE1	1
ENSG00000214021_TTLL3	1
ENSG00000214087_ARL16	1
ENSG00000214193_SH3D21	1
ENSG00000215769_ARHGAP27P1-BPTFP1-KPNA2P3	1
ENSG00000222009_BTBD19	1
ENSG00000223959_AFG3L1P	1
ENSG00000225470_JPX	1
ENSG00000227500_SCAMP4	1
ENSG00000228451_SDAD1P1	1
ENSG00000228526_MIR34AHG	1
ENSG00000229847_EMX2OS	1
ENSG00000230701_FBXW4P1	1
ENSG00000230870_FBXW11P1	1
ENSG00000231064_THBS3-AS1	1
ENSG00000231721_LINC-PINT	1
ENSG00000231925_TAPBP	1
ENSG00000232284_GNG12-AS1	1
ENSG00000232400_RAD17P1	1
ENSG00000236830_CBR3-AS1	1
ENSG00000239388_ASB14	1
ENSG00000240849_PEDS1	1
ENSG00000241680_RPL31P49	1
ENSG00000241878_PISD	1
ENSG00000243701_DUBR	1
ENSG00000244509_APOBEC3C	1
ENSG00000245532_NEAT1	1
ENSG00000246985_SOCS2-AS1	1
ENSG00000247077_PGAM5	1
ENSG00000247556_OIP5-AS1	1
ENSG00000250151_ARPC4-TTLL3	1
ENSG00000254064_PIWIL2-DT	1
ENSG00000254860_TMEM9B-AS1	1
ENSG00000255262_ELOBP2	1
ENSG00000255284_GATD1-DT	1
ENSG00000255302_EID1	1
ENSG00000256087_ZNF432	1
ENSG00000258839_MC1R	1
ENSG00000260852_FBXL19-AS1	1
ENSG00000261371_PECAM1	1
ENSG00000265491_RNF115	1
ENSG00000267121_FMNL1-DT	1
ENSG00000269343_ZNF587B	1
ENSG00000284308_C2orf81	1
ENSG00000285458_C4orf36	1

## Sheet: 7
Supplementary table 7. The P values of the ME-Trait correlations in infant placentas
NO.	ME	MEcolor	tissues	sex	Population	nonRP OvEd	repeat OvEd	BW	BPD	FL	GT	PW	PLV	AG	AFMD	AFI	FH	FUH
1	module 1	MEpink	Umbilical Cord	Male	0.0752103	0.134107	6.9637e-06	0.308222	0.00567537	0.0892805	0.513723	0.744816	0.480313	0.31067	0.909955	0.380999	0.762299	0.387016
2	module 2	MEpurple	Umbilical Cord	Male	0.00839273	0.033744	0.000387881	0.511992	0.788925	0.396629	0.357873	0.437735	0.370429	0.0718697	0.423759	0.282811	0.86782	0.924683
3	module 3	MEred	Umbilical Cord	Male	0.00137188	0.00837574	0.000661454	0.447333	0.840464	0.807592	0.167161	0.205201	0.198621	0.896686	0.647802	0.374379	0.675029	0.568585
4	module 4	MEbrown	Umbilical Cord	Male	0.260996	0.164749	0.0123139	0.88397	0.840823	0.589459	0.0178047	0.640054	0.0910009	0.212124	0.284799	0.558636	0.888441	0.32507
5	module 5	MEgreenyellow	Umbilical Cord	Male	0.138121	0.280209	0.00901986	0.91659	0.436165	0.95046	0.0161271	0.127917	0.083673	0.241024	0.321228	0.343501	0.0475103	0.849239
6	module 6	MEblue	Umbilical Cord	Male	0.0585279	0.0640294	0.491376	0.472439	0.36531	0.342562	0.352	0.633126	0.739766	0.730925	0.107509	0.112037	0.84965	0.712147
7	module 7	MEblack	Umbilical Cord	Male	0.00328635	0.00283754	0.103687	0.238037	0.80726	0.697734	0.226959	0.763598	0.57333	0.990262	0.0281007	0.0234487	0.944502	0.659585
8	module 8	MEturquoise	Umbilical Cord	Male	0.00176104	0.000273591	0.00187262	0.585928	0.844318	0.801107	0.394986	0.468283	0.253911	0.5216	0.0475785	0.00259615	0.817904	0.681245
9	module 9	MEyellow	Umbilical Cord	Male	0.0712751	0.0387491	0.170759	0.35111	0.860711	0.824872	0.134644	0.279993	0.907743	0.864	0.165143	0.00995048	0.635078	0.446824
10	module 10	MEgreen	Umbilical Cord	Male	0.295857	0.565882	0.80203	0.751043	0.705187	0.210627	0.124696	0.374567	0.253227	0.69029	0.040283	0.23842	0.898719	0.669032
11	module 11	MEmagenta	Umbilical Cord	Male	0.635943	0.867347	0.938905	0.636362	0.567672	0.444451	0.0255586	0.632193	0.0402559	0.581389	0.43401	0.48953	0.729397	0.365694
12	module 12	MEgrey	Umbilical Cord	Male	0.0132561	0.0337581	0.00022742	0.964537	0.41769	0.953761	0.0544732	0.189487	0.291538	0.0831236	0.216404	0.125601	0.871497	0.895603
13	module 13	MEpurple	Umbilical Cord	Female	0.323915	0.201083	0.461996	0.150319	0.0835438	0.0569515	0.0623744	0.850894	0.308729	0.318529	0.449549	0.608458	0.984307	0.967533
14	module 14	MEtan	Umbilical Cord	Female	0.852329	0.129767	0.0684582	0.986162	0.963467	0.61292	0.189346	0.329384	0.0446259	0.0107705	0.917497	0.706225	0.458067	0.417878
15	module 15	MEblack	Umbilical Cord	Female	0.948816	0.0769111	0.139577	0.173515	0.961149	0.644081	0.147028	0.507	0.562539	0.609115	0.472895	0.374227	0.21506	0.784341
16	module 16	MEblue	Umbilical Cord	Female	0.385001	0.817494	0.00526393	0.7994	0.848208	0.89482	0.186588	0.465485	0.228321	0.694509	0.628062	0.847549	0.321527	0.833127
17	module 17	MEmagenta	Umbilical Cord	Female	0.929297	0.59011	0.00124536	0.232772	0.340597	0.0588912	0.946801	0.866319	0.938454	0.50669	0.545185	0.784024	0.107707	0.611145
18	module 18	MEred	Umbilical Cord	Female	0.731446	0.419526	0.0045274	0.680156	0.538461	0.236922	0.681379	0.962772	0.69891	0.0461568	0.392782	0.470513	0.265584	0.619719
19	module 19	MEgreen	Umbilical Cord	Female	0.471288	0.603603	1.80411e-06	0.420783	0.233901	0.0571304	0.642531	0.491767	0.820077	0.887112	0.160088	0.273649	0.209664	0.347149
20	module 20	MEbrown	Umbilical Cord	Female	0.759482	0.598065	3.68409e-06	0.274217	0.284872	0.135837	0.973358	0.407715	0.980789	0.576694	0.646418	0.489716	0.0515641	0.647439
21	module 21	MEyellow	Umbilical Cord	Female	0.698657	0.975238	4.23997e-05	0.183318	0.035723	0.0148201	0.666846	0.917795	0.700834	0.975725	0.18819	0.421944	0.0194128	0.185184
22	module 22	MEdarkred	Umbilical Cord	Female	0.523528	0.158487	0.0944369	0.877923	0.747633	0.15834	0.856676	0.438669	0.830428	0.127257	0.28794	0.100036	0.737306	0.0221365
23	module 23	MElightgreen	Umbilical Cord	Female	0.712944	0.0802564	0.00132658	0.232805	0.108169	0.0802563	0.544315	0.854792	0.532494	0.300878	0.64038	0.012443	0.994755	0.892792
24	module 24	MEgrey60	Umbilical Cord	Female	0.082914	0.873332	0.0198911	0.9889	0.283257	0.285563	0.683935	0.288961	0.290239	0.67354	0.576192	0.0180681	0.0998853	0.83923
25	module 25	MElightyellow	Umbilical Cord	Female	0.131023	0.0741344	6.64844e-05	0.684807	0.863138	0.665048	0.644091	0.333973	0.572182	0.527016	0.606045	0.0614968	0.713937	0.699146
26	module 26	MEsalmon	Umbilical Cord	Female	0.310836	0.374503	0.000192175	0.347957	0.399443	0.429859	0.637066	0.951678	0.0733824	0.717618	0.791595	0.246922	0.600306	0.282897
27	module 27	MEmidnightblue	Umbilical Cord	Female	0.22819	0.733059	0.00139508	0.793856	0.770998	0.879046	0.967916	0.239587	0.320805	0.490773	0.457886	0.100991	0.266284	0.476436
28	module 28	MEpink	Umbilical Cord	Female	0.236151	0.594154	0.00105993	0.543133	0.559025	0.170431	0.108665	0.127984	0.181333	0.757679	0.429024	0.0357721	0.564005	0.888503
29	module 29	MEcyan	Umbilical Cord	Female	0.308135	0.82186	0.000464443	0.921842	0.867402	0.863133	0.244962	0.249353	0.367592	0.569879	0.171302	0.0740922	0.802668	0.804026
30	module 30	MElightcyan	Umbilical Cord	Female	0.250227	0.300585	4.07169e-05	0.754059	0.711989	0.617064	0.143043	0.124172	0.207653	0.764211	0.416983	0.102452	0.795636	0.532647
31	module 31	MEturquoise	Umbilical Cord	Female	0.872319	0.943423	9.32834e-06	0.412833	0.807661	0.67209	0.779077	0.035766	0.646056	0.949799	0.348191	0.00291111	0.687563	0.505417
32	module 32	MEgreenyellow	Umbilical Cord	Female	0.121411	0.16323	0.023829	0.222805	0.81923	0.853151	0.165118	0.658038	0.658918	0.159856	0.606334	0.520803	0.337219	0.60419
33	module 33	MEroyalblue	Umbilical Cord	Female	0.480207	0.387712	0.157812	0.824805	0.648785	0.593897	0.218257	0.774083	0.531262	0.584492	0.449574	0.757884	0.677596	0.152829
34	module 34	MEgrey	Umbilical Cord	Female	0.349763	0.0749075	0.561262	0.478732	0.97558	0.93625	0.267625	0.629994	0.387169	0.162148	0.352327	0.338785	0.351973	0.338295
35	module 35	MEblue	Amnion	Male	0.229098	0.567273	2.21284e-10	0.945236	0.212753	0.522395	0.532602	0.984621	0.813388	0.155574	0.660485	0.275719	0.65228	0.0915984
36	module 36	MEturquoise	Amnion	Male	0.0239495	0.247098	5.73521e-09	0.593792	0.0671917	0.301541	0.562886	0.607205	0.647716	0.893685	0.114299	0.198059	0.955926	0.269518
37	module 37	MEbrown	Amnion	Male	0.107343	0.806344	0.00129885	0.691163	0.0480146	0.399372	0.394519	0.441054	0.677698	0.807849	0.178953	0.28702	0.97925	0.620684
38	module 38	MEred	Amnion	Male	0.0462578	0.800722	0.00351013	0.172063	0.766747	0.639003	0.767626	0.355912	0.239219	0.454791	0.628142	0.970276	0.379982	0.536074
39	module 39	MEgreen	Amnion	Male	0.361923	0.461021	0.797361	0.511574	0.074852	0.141261	0.765603	0.564386	0.830317	0.0333839	0.000381928	0.00282198	0.315364	0.00344443
40	module 40	MEyellow	Amnion	Male	0.0255674	0.576489	0.940297	0.884463	0.342263	0.191084	0.760588	0.674482	0.530916	0.279836	0.0324968	0.0279204	0.635537	0.327399
41	module 41	MEgrey	Amnion	Male	0.161492	0.315043	0.0529843	0.182354	0.138692	0.0274715	0.561035	0.786004	0.656797	0.258455	0.321508	0.887604	0.0689636	0.418353
42	module 42	MEbrown	Amnion	Female	0.567363	0.416948	0.211796	0.0504084	0.0834485	0.0785852	0.126926	0.109177	0.121837	0.928801	0.28535	0.257248	0.661597	0.376853
43	module 43	MEblue	Amnion	Female	0.885793	0.301595	0.000583781	0.0134041	0.00577737	0.000882899	0.00481139	0.614718	0.548673	0.612296	0.81915	0.965744	0.432773	0.253427
44	module 44	MEturquoise	Amnion	Female	0.362417	0.240246	2.65724e-12	0.186181	0.0125078	0.000267397	0.271239	0.292889	0.237639	0.627204	0.867698	0.669861	0.212534	0.946903
45	module 45	MEyellow	Amnion	Female	0.88797	0.0877809	1.60848e-05	0.0483568	0.0373674	0.00708097	0.276314	0.442451	0.317996	0.382194	0.0123381	0.1056	0.302072	0.09542
46	module 46	MEgrey	Amnion	Female	0.269442	0.359525	0.570067	0.104085	0.181195	0.0930387	0.144858	0.442479	0.709477	0.356473	0.841606	0.76257	0.408928	0.294617
47	module 47	MElightyellow	Chorion	Male	0.515337	0.266257	0.11685	0.279758	0.217223	0.233113	0.932277	0.870912	0.157311	0.916954	0.823022	0.496744	0.112652	0.96959
48	module 48	MEgreenyellow	Chorion	Male	0.846135	0.00309076	0.238496	0.603727	0.699791	0.631208	0.0709694	0.652319	0.757656	0.145663	0.164641	0.467491	0.045689	0.621977
49	module 49	MElightgreen	Chorion	Male	0.0414514	0.000712261	0.850686	0.0107701	0.903217	0.643721	0.022952	0.00265318	0.0586623	0.300763	0.678369	0.577713	0.546618	0.980574
50	module 50	MElightcyan	Chorion	Male	0.0541988	0.000954188	0.694302	0.752685	0.482024	0.359589	0.935359	0.373925	0.759803	0.195164	0.328918	0.194994	0.31248	0.639433
51	module 51	MEmagenta	Chorion	Male	0.64475	0.0222691	0.169557	0.284071	0.595581	0.574092	0.0834542	0.360611	0.241406	0.613924	0.0908537	0.979902	0.856637	0.0199779
52	module 52	MEpink	Chorion	Male	0.0317132	0.0402293	0.00828842	0.0240805	0.25899	0.0993098	0.906668	0.343829	0.426202	0.572803	0.715412	0.120385	0.616695	0.190648
53	module 53	MEbrown	Chorion	Male	0.20748	0.00458133	0.0821219	0.144579	0.43437	0.324454	0.142846	0.575474	0.177094	0.850663	0.468933	0.241404	0.812455	0.244124
54	module 54	MEyellow	Chorion	Male	0.160345	1.96302e-07	0.863915	0.0539265	0.489928	0.389358	0.205565	0.237787	0.887111	0.629911	0.83102	0.543871	0.425851	0.132356
55	module 55	MEgreen	Chorion	Male	0.0808721	0.0114945	0.391345	0.0695739	0.479584	0.540083	0.783124	0.050736	0.375879	0.197151	0.855239	0.0491513	0.975854	0.247386
56	module 56	MEblack	Chorion	Male	0.0176317	0.00303781	0.465824	0.244801	0.564571	0.963414	0.502696	0.663259	0.841985	0.794825	0.571857	0.156833	0.997506	0.303409
57	module 57	MEtan	Chorion	Male	0.0269751	0.00417911	0.259035	0.109439	0.518809	0.282657	0.857463	0.436644	0.862146	0.392008	0.355728	0.00844109	0.505843	0.305127
58	module 58	MEpurple	Chorion	Male	0.0271152	0.568807	0.543347	0.150029	0.422111	0.270642	0.785555	0.647594	0.760456	0.348477	0.254599	0.0652847	0.55134	0.513649
59	module 59	MEmidnightblue	Chorion	Male	0.0658275	0.891577	0.000439103	0.157991	0.0316068	0.0391531	0.978094	0.936336	0.452992	0.0682211	0.837851	0.0224387	0.688536	0.19239
60	module 60	MEblue	Chorion	Male	0.00636157	0.7271	0.0186046	0.538729	0.550075	0.485032	0.297498	0.805326	0.891883	0.059315	0.326963	0.00474051	0.4499	0.518469
61	module 61	MEturquoise	Chorion	Male	0.186273	0.536832	0.0340772	0.356394	0.681385	0.55826	0.625758	0.562515	0.459689	0.0960275	0.618922	0.0192593	0.540916	0.259664
62	module 62	MEcyan	Chorion	Male	0.0251013	0.0822017	0.964779	0.269694	0.386757	0.363221	0.279651	0.663866	0.45357	0.54771	0.345021	0.183462	0.743047	0.741625
63	module 63	MEsalmon	Chorion	Male	0.78393	0.408011	0.000547607	0.110533	0.0216406	0.0367345	0.699737	0.540464	0.402638	0.845141	0.482081	0.961204	0.821969	0.111381
64	module 64	MEgrey60	Chorion	Male	0.831688	0.0686464	0.00283883	0.98236	0.283348	0.0843637	0.411829	0.392442	0.13159	0.115312	0.35445	0.653429	0.707951	0.527968
65	module 65	MEred	Chorion	Male	0.473375	0.218432	0.00138191	0.0656214	0.343037	0.0837275	0.669165	0.951819	0.0688439	0.151604	0.5244	0.37215	0.15045	0.285951
66	module 66	MEgrey	Chorion	Male	0.454199	0.0453348	0.406095	0.303124	0.544212	0.985676	0.457474	0.945721	0.338719	0.392978	0.918725	0.503857	0.0956809	0.788562
67	module 67	MEgreenyellow	Chorion	Female	0.103071	0.000114182	0.124467	0.742937	0.629513	0.929163	0.956229	0.21157	0.0643871	0.00559828	0.734342	0.799088	0.484791	0.0637175
68	module 68	MEgreen	Chorion	Female	0.880687	0.000154432	0.281079	0.456187	0.472156	0.526381	0.366875	0.0657396	0.375019	0.699718	0.212273	0.384452	0.125713	0.477224
69	module 69	MEpink	Chorion	Female	0.42608	0.0629425	0.800415	0.072961	0.0429293	0.154712	0.452236	0.0323592	0.531329	0.814005	0.967058	0.923472	0.856354	0.0618481
70	module 70	MEcyan	Chorion	Female	0.145423	0.830671	0.0296568	0.276692	0.557067	0.994255	0.761671	0.409377	0.358524	0.803304	0.732694	0.199641	0.110376	0.176087
71	module 71	MEmagenta	Chorion	Female	0.0238297	0.903776	0.00756681	0.984497	0.954931	0.26979	0.854097	0.915775	0.0404629	0.675569	0.181159	0.00723336	0.919991	0.909657
72	module 72	MEyellow	Chorion	Female	0.0513438	0.387704	0.142644	0.277789	0.081042	0.0152211	0.0879006	0.247769	0.0090032	0.912661	0.384279	0.156474	0.529662	0.749563
73	module 73	MEblack	Chorion	Female	0.159159	0.301393	0.0515504	0.869067	0.746159	0.632354	0.404287	0.825784	0.0848618	0.149619	0.199508	0.0942916	0.286861	0.103044
74	module 74	MEtan	Chorion	Female	0.181141	0.0489528	0.000128658	0.207138	0.0329025	0.114985	0.517347	0.0651666	0.146198	0.328743	0.832549	0.380054	0.671198	0.422848
75	module 75	MEblue	Chorion	Female	0.128601	0.00424569	0.000204511	0.588161	0.541838	0.914785	0.262231	0.358327	0.099064	0.607364	0.871381	0.0496081	0.383425	0.676383
76	module 76	MEturquoise	Chorion	Female	0.0477809	0.00220941	0.0661358	0.666137	0.920726	0.310486	0.672888	0.878101	0.0266546	0.495358	0.759816	0.165489	0.442118	0.702368
77	module 77	MEpurple	Chorion	Female	0.111833	0.0175954	0.00053789	0.922897	0.211157	0.168658	0.995719	0.84531	0.100965	0.760706	0.470604	0.132729	0.301233	0.697795
78	module 78	MEred	Chorion	Female	0.0220804	0.00240496	0.000289236	0.940281	0.707884	0.810758	0.805575	0.689359	0.0085482	0.534342	0.519144	0.374351	0.114242	0.938361
79	module 79	MEbrown	Chorion	Female	0.202654	0.894278	3.95172e-05	0.419297	0.0655655	0.346148	0.00104135	0.998563	0.105286	0.274916	0.169628	0.000520555	0.981118	0.867427
80	module 80	MEsalmon	Chorion	Female	0.5111	0.829801	0.000692031	0.67497	0.458307	0.727594	0.618218	0.60751	0.0923333	0.205138	0.0534964	0.0560315	0.615432	0.384348
81	module 81	MEgrey	Chorion	Female	0.0869385	0.714341	0.0120554	0.931286	0.939246	0.318793	0.440196	0.945079	0.238055	0.435459	0.45956	0.0678672	0.360404	0.668431
82	module 82	MEbrown	Chorionic Plate	Male	0.60819	0.441667	9.97772e-05	0.934916	0.0215769	0.0987108	0.814814	0.779849	0.147384	0.721188	0.763986	0.64683	0.781576	0.202423
83	module 83	MEgreen	Chorionic Plate	Male	0.579836	0.613341	1.43951e-05	0.975838	0.560328	0.79966	0.267969	0.18689	0.613415	0.97447	0.535487	0.802797	0.040887	0.470508
84	module 84	MEmagenta	Chorionic Plate	Male	0.302479	0.129195	0.00010643	0.149022	0.594526	0.467083	0.239215	0.395774	0.623421	0.181658	0.822881	0.80897	0.787237	0.421974
85	module 85	MEblack	Chorionic Plate	Male	0.504375	0.891313	8.27904e-07	0.563135	0.445034	0.953633	0.918815	0.987292	0.18952	0.217332	0.763472	0.285201	0.823246	0.196963
86	module 86	MEturquoise	Chorionic Plate	Male	0.328876	0.475146	9.63886e-09	0.851174	0.746586	0.782932	0.374107	0.500398	0.353177	0.21789	0.659052	0.632892	0.294362	0.117104
87	module 87	MEyellow	Chorionic Plate	Male	0.920171	0.857517	6.07214e-09	0.563816	0.225153	0.369761	0.81649	0.887887	0.138766	0.586333	0.525671	0.750672	0.425449	0.182375
88	module 88	MEblue	Chorionic Plate	Male	0.519206	0.615261	3.60136e-05	0.611207	0.679954	0.784156	0.86334	0.537793	0.367266	0.107588	0.733189	0.519173	0.59752	0.3462
89	module 89	MEpink	Chorionic Plate	Male	0.542333	0.715016	7.71036e-05	0.76239	0.0946489	0.165161	0.43092	0.794155	0.900815	0.414524	0.236743	0.985232	0.377664	0.390925
90	module 90	MEsalmon	Chorionic Plate	Male	0.438016	0.446826	0.16211	0.330019	0.981765	0.908325	0.420847	0.540719	0.921938	0.346005	0.891107	0.979352	0.802764	0.537945
91	module 91	MEtan	Chorionic Plate	Male	0.752535	0.916712	0.0915376	0.387243	0.378349	0.918464	0.107869	0.15636	0.165346	0.581285	0.814766	0.656963	0.517358	0.162487
92	module 92	MEgreenyellow	Chorionic Plate	Male	0.545222	0.321636	0.0770004	0.422396	0.982842	0.64864	0.235854	0.195878	0.0758751	0.552938	0.203899	0.337282	0.015657	0.252491
93	module 93	MEred	Chorionic Plate	Male	0.189633	0.491556	0.0147625	0.710604	0.547909	0.0982597	0.119046	0.162763	0.178898	0.404643	0.780852	0.581605	0.235804	0.155015
94	module 94	MEcyan	Chorionic Plate	Male	0.848504	0.965573	0.741222	0.515587	0.73089	0.532598	0.0260874	0.544203	0.641292	0.0987135	0.614537	0.717967	0.46245	0.189058
95	module 95	MEpurple	Chorionic Plate	Male	0.0471849	0.308893	0.352937	0.111479	0.656315	0.65476	0.563889	0.525791	0.906362	0.31614	0.00779318	0.00608685	0.742549	0.672887
96	module 96	MEgrey	Chorionic Plate	Male	0.00011724	0.000588682	0.0294831	0.407792	0.911286	0.40109	0.445317	0.620608	0.115106	0.592835	0.291264	0.225482	0.426596	0.792634
97	module 97	MEcyan	Chorionic Plate	Female	0.237535	0.3203	0.0920762	0.29072	0.469177	0.91268	0.590588	0.509023	0.568769	0.563156	0.457923	0.691571	0.232991	0.0518382
98	module 98	MEmagenta	Chorionic Plate	Female	0.506232	0.705939	0.00392687	0.355014	0.868618	0.190159	0.759704	0.485967	0.675823	0.575796	0.882986	0.869021	0.434098	0.118257
99	module 99	MEsalmon	Chorionic Plate	Female	0.196777	0.515081	0.320997	0.898439	0.401849	0.419536	0.306519	0.327144	0.535604	0.439093	0.978241	0.929941	0.549403	0.546797
100	module 100	MEblack	Chorionic Plate	Female	0.0876116	0.0400072	0.0029278	0.389335	0.30647	0.118752	0.476202	0.0712103	0.792245	0.488165	0.380619	0.596357	0.94952	0.0127741
101	module 101	MEturquoise	Chorionic Plate	Female	0.8696	0.0615354	4.31055e-08	0.195785	0.788236	0.334654	0.726694	0.107808	0.445653	0.538683	0.686551	0.594924	0.892364	0.0773688
102	module 102	MEgreen	Chorionic Plate	Female	0.823719	0.324074	7.19228e-05	0.23376	0.855401	0.468978	0.351436	0.183191	0.583469	0.371119	0.227767	0.532715	0.820564	0.432126
103	module 103	MEred	Chorionic Plate	Female	0.281636	0.0817754	0.000173913	0.297879	0.934011	0.445208	0.599703	0.0141391	0.630372	0.664911	0.68174	0.814791	0.22107	0.454187
104	module 104	MEblue	Chorionic Plate	Female	0.443321	0.613431	0.0379449	0.408641	0.888822	0.712924	0.19214	0.0135991	0.794802	0.839277	0.0634058	0.178936	0.49503	0.17218
105	module 105	MEpink	Chorionic Plate	Female	0.380632	0.245253	0.00874502	0.239021	0.429413	0.935546	0.965265	0.041453	0.309398	0.707557	0.420842	0.868236	0.298217	0.0465333
106	module 106	MEpurple	Chorionic Plate	Female	0.728379	0.607909	0.253171	0.0726295	0.738841	0.897255	0.21712	0.399874	0.465131	0.695567	0.0583593	0.322798	0.815133	0.106791
107	module 107	MEtan	Chorionic Plate	Female	0.0520287	0.150121	0.415537	0.831017	0.605064	0.584383	0.212393	0.100423	0.738117	0.955816	0.787635	0.728976	0.760241	0.0274705
108	module 108	MEyellow	Chorionic Plate	Female	0.592241	0.889084	0.168664	0.901417	0.854088	0.71378	0.254985	0.783668	0.68738	0.0330123	0.268258	0.857505	0.288289	0.407004
109	module 109	MEbrown	Chorionic Plate	Female	0.790802	0.244084	0.0146493	0.291302	0.956595	0.847645	0.976869	0.166904	0.422382	0.799179	0.515711	0.900882	0.930636	0.392245
110	module 110	MEgreenyellow	Chorionic Plate	Female	0.10945	0.103819	0.820354	0.818933	0.695834	0.736523	0.353768	0.695273	0.695486	0.254181	0.716637	0.620451	0.744901	0.0702532
111	module 111	MEgrey	Chorionic Plate	Female	0.965972	0.672777	0.656056	0.873771	0.568531	0.642147	0.446424	0.914861	0.670102	0.138398	0.582454	0.67955	0.659412	0.644036
112	module 112	MEgrey60	Villus of Fetal	Male	0.201905	0.277926	0.274447	0.372647	0.199708	0.222746	0.992107	0.81029	0.280172	0.989539	0.663906	0.130401	0.0608826	0.823991
113	module 113	MElightyellow	Villus of Fetal	Male	0.771221	0.435021	0.698411	0.386004	0.104426	0.0866467	0.100418	0.303896	0.0444951	0.598737	0.983383	0.818596	0.267442	0.376718
114	module 114	MEgreen	Villus of Fetal	Male	0.567853	0.214232	0.827175	0.0714611	0.0522686	0.0351741	0.167243	0.154078	0.18302	0.874455	0.872653	0.333346	0.120453	0.543817
115	module 115	MElightgreen	Villus of Fetal	Male	0.996028	0.760674	0.465648	0.979603	0.883757	0.736268	0.984189	0.066691	0.978332	0.917693	0.899571	0.516903	0.588525	0.801537
116	module 116	MEmagenta	Villus of Fetal	Male	0.13881	0.370031	0.868393	0.26255	0.635475	0.475265	0.39315	0.426485	0.166474	0.332588	0.287144	0.387094	0.270724	0.484916
117	module 117	MEtan	Villus of Fetal	Male	0.860593	0.436439	0.00381544	0.0772916	0.338423	0.250278	0.302708	0.141257	0.0843122	0.564123	0.654121	0.280464	0.829708	0.204063
118	module 118	MEgreenyellow	Villus of Fetal	Male	0.590194	0.262419	0.00138172	0.186754	0.161463	0.182648	0.597487	0.795305	0.34804	0.328449	0.759754	0.89711	0.595663	0.261558
119	module 119	MEsalmon	Villus of Fetal	Male	0.551977	0.703753	0.00040841	0.583444	0.953097	0.996401	0.906018	0.319568	0.377963	0.517041	0.795806	0.712097	0.117149	0.725763
120	module 120	MEcyan	Villus of Fetal	Male	0.75874	0.49463	0.0210962	0.839636	0.785733	0.444202	0.662728	0.630345	0.0839615	0.6292	0.612641	0.992646	0.736425	0.345491
121	module 121	MEturquoise	Villus of Fetal	Male	0.880064	0.710203	3.37518e-06	0.293877	0.354203	0.0566324	0.328754	0.788006	0.207046	0.902265	0.742541	0.669211	0.878405	0.0262593
122	module 122	MEbrown	Villus of Fetal	Male	0.713966	0.380054	0.0112508	0.0195418	0.550606	0.123125	0.678828	0.35696	0.371775	0.707441	0.751855	0.684445	0.133897	0.147901
123	module 123	MEmidnightblue	Villus of Fetal	Male	0.322751	0.80853	0.000150802	0.0478181	0.917359	0.360936	0.527398	0.065436	0.692939	0.669729	0.934447	0.21347	0.894878	0.293335
124	module 124	MEred	Villus of Fetal	Male	0.950139	0.768759	0.0397966	0.992139	0.643334	0.799898	0.545627	0.150379	0.339923	0.568837	0.727764	0.833055	0.0729293	0.123047
125	module 125	MEblue	Villus of Fetal	Male	0.376482	0.711005	0.116268	0.494785	0.28816	0.0267863	0.0711069	0.0796736	0.453777	0.564511	0.832261	0.517685	0.145313	0.207678
126	module 126	MElightcyan	Villus of Fetal	Male	0.265234	0.801078	0.133374	0.773327	0.261059	0.197679	0.217495	0.417831	0.139391	0.888712	0.465177	0.928292	0.39781	0.164035
127	module 127	MEblack	Villus of Fetal	Male	0.432408	0.166342	0.16626	0.438568	0.442057	0.617087	0.278732	0.0174094	0.000277238	0.761311	0.879661	0.208782	0.298455	0.00566687
128	module 128	MEpink	Villus of Fetal	Male	0.213644	0.524883	0.399776	0.384776	0.965429	0.587299	0.799945	0.396908	0.708316	0.880138	0.047859	0.0301526	0.876247	0.220121
129	module 129	MEpurple	Villus of Fetal	Male	0.830323	0.84489	0.113538	0.606183	0.873002	0.621724	0.0748723	0.225834	0.158388	0.274019	0.694808	0.337127	0.437331	0.0364641
130	module 130	MEyellow	Villus of Fetal	Male	0.842374	0.678177	0.297055	0.619941	0.782552	0.469103	0.0884535	0.0030194	0.0569378	0.202468	0.82738	0.532759	0.887806	0.598536
131	module 131	MEgrey	Villus of Fetal	Male	0.0329644	0.63076	0.286648	0.576707	0.378653	0.703692	0.300327	0.234522	0.0121685	0.530572	0.357642	0.0837452	0.488753	0.0206326
132	module 132	MElightgreen	Villus of Fetal	Female	0.186105	0.862209	0.102376	0.723692	0.742476	0.738134	0.771642	0.782139	0.468947	0.706207	0.668517	0.646684	0.961472	0.457518
133	module 133	MEtan	Villus of Fetal	Female	0.769759	0.706024	0.812057	0.514082	0.483427	0.199371	0.527295	0.175095	0.257413	0.664801	0.831755	0.385681	0.501932	0.413022
134	module 134	MElightyellow	Villus of Fetal	Female	0.0229468	0.00307429	0.000989905	0.367881	0.998209	0.545964	0.591962	0.104952	0.575159	0.905296	0.360343	0.697163	0.238632	0.527774
135	module 135	MEpurple	Villus of Fetal	Female	0.653122	0.332378	0.468115	0.357851	0.501154	0.24077	0.757026	0.175497	0.784846	0.619787	0.847231	0.396744	0.108218	0.706454
136	module 136	MEpink	Villus of Fetal	Female	0.0614028	0.0990553	0.0731218	0.442507	0.59736	0.850638	0.895212	0.775424	0.768071	0.209998	0.479745	0.381227	0.595933	0.75716
137	module 137	MEyellow	Villus of Fetal	Female	0.0234411	0.0643457	0.864691	0.119223	0.0212997	0.227425	0.129376	0.763203	0.902574	0.97165	0.909295	0.320813	0.0111881	0.318234
[truncated: 98 more rows]

## Sheet: 8
Supplementary table 8. The R values of the ME-Trait correlations in infant placentas
[truncated: 236 more rows]

[truncated: 1 more sheets: 9]
