# Supplementary material for: Sex-biased RNA editing in Tibetan Placentas enhances hypoxia adaptation via developmental and immune pathways
Source: Research Square preprint supplement (doi:10.21203/rs.3.rs-7228927/v1), 2025-12-04
Supplement: Supplementary file 2 [file bcf384422f29423b1a389c44.xlsx]

## Sheet: 报告
	报告：成功合并 68 个工作表，共 5454 行数据。
	工作簿	工作表	合并状态	合并后的位置
	F1A-Han-all-sites-distribution-editing-type.csv	F1A-Han-all-sites-distribution-	成功	总表!B1:D37
	F1B-Tibetan-all-sites-distribution-editing-type.csv	F1B-Tibetan-all-sites-distribut	成功	总表!B38:D74
	F1C-Han-all-sites-distribution-gene-region.csv	F1C-Han-all-sites-distribution-	成功	总表!B75:D108
	F1D-Tibetan-all-sites-distribution-gene-region.csv	F1D-Tibetan-all-sites-distribut	成功	总表!B109:D142
	F1E-Han-all-sites-distribution-Repeat-Type.csv	F1E-Han-all-sites-distribution-	成功	总表!B143:D146
	F1F-Tibetan-all-sites-distribution-Repeat-Type.csv	F1F-Tibetan-all-sites-distribut	成功	总表!B147:D150
	F1G-Han-all-sites-distribution-known-site.csv	F1G-Han-all-sites-distribution-	成功	总表!B151:D155
	F1G-Tibetan-all-sites-distribution-known-site.csv	F1G-Tibetan-all-sites-distribut	成功	总表!B156:D160
	F2A-Amnion-repeat-OvEd-Wilcoxon.csv	F2A-Amnion-repeat-OvEd-Wilcoxon	成功	总表!B161:G231
	F2B-Chorionic Plate-repeat-OvEd-Wilcoxon.csv	F2B-Chorionic Plate-repeat-OvEd	成功	总表!B232:G302
	F2C-Chorion-repeat-OvEd-Wilcoxon.csv	F2C-Chorion-repeat-OvEd-Wilcoxo	成功	总表!B303:G372
	F2D-Umbilical Cord-repeat-OvEd-Wilcoxon.csv	F2D-Umbilical Cord-repeat-OvEd-	成功	总表!B373:G440
	F2E-Villus of Maternal-repeat-OvEd-Wilcoxon.csv	F2E-Villus of Maternal-repeat-O	成功	总表!B441:G511
	F2F-Villus of Intermediate-repeat-OvEd-Wilcoxon.csv	F2F-Villus of Intermediate-repe	成功	总表!B512:G582
	F2G-Villus of Fetal-repeat-OvEd-Wilcoxon.csv	F2G-Villus of Fetal-repeat-OvEd	成功	总表!B583:G653
	F3A-metadata of PCC.csv	F3A-metadata of PCC	成功	总表!B654:E1140
	F3A-sampleDist of PCC.csv	F3A-sampleDist of PCC	成功	总表!B1141:RT1627
	F3B&C-PCA.csv	F3B&C-PCA	成功	总表!B1628:H2110
	F4A-distribution of diffsites with non-sex.csv	F4A-distribution of diffsites w	成功	总表!B2111:D2146
	F4A-Distribution of layer shared DES with non-sex.csv	F4A-Distribution of layer share	成功	总表!B2147:D2149
	F4B-GO-of-Amnion-allsites_enrichment_results.xlsx	Sheet 1	成功	总表!B2150:J2159
	F4C-GO-of-Chorion-allsites_enrichment_results.xlsx	Sheet 1	成功	总表!B2160:J2175
	F4D-editing level of EMP2_16-10531456 each tissue.csv	F4D-editing level of EMP2_16-10	成功	总表!B2176:F2239
	F4E-editing level of ZNF397_18-35247800 each tissue.csv	F4E-editing level of ZNF397_18-	成功	总表!B2240:F2295
	F5A&B-distribution of diffsites with sex bias.csv	F5A&B-distribution of diffsites	成功	总表!B2296:E2366
	F5A-Distribution of layer shared DES at Male.csv	F5A-Distribution of layer share	成功	总表!B2367:D2372
	F5B-Distribution of layer shared DES at Female.csv	F5B-Distribution of layer share	成功	总表!B2373:D2376
	F5C-editing level of CTSB_8-11843176 each tissue in Male.csv	F5C-editing level of CTSB_8-118	成功	总表!B2377:F2593
	F5D-TPM of CTSB each tissue at Male.csv	F5D-TPM of CTSB each tissue at	成功	总表!B2594:F2845
	F6A-GO-of-Umbilical Cord-allsites-Male_enrichment_results.xlsx	Sheet 1	成功	总表!B2846:J2898
	F6B-GO-of-Amnion-allsites-Male_enrichment_results.xlsx	Sheet 1	成功	总表!B2899:J3012
	F6C-GO-of-Chorion-allsites-Male_enrichment_results.xlsx	Sheet 1	成功	总表!B3013:J3088
	F6D-GO-of-Chorionic Plate-allsites-Male_enrichment_results.xlsx	Sheet 1	成功	总表!B3089:J3141
	F6E-GO-of-Chorion-allsites-Female_enrichment_results.xlsx	Sheet 1	成功	总表!B3142:J3243
	F7A-gene-sitesnumber-Human.csv	F7A-gene-sitesnumber-Human	成功	总表!B3244:D3265
	F7B-gene2tissue-Male-Human.csv	F7B-gene2tissue-Male-Human	成功	总表!B3266:E3314
	F7C-gene2tissue-Female-Human.csv	F7C-gene2tissue-Female-Human	成功	总表!B3315:E3341
	F8A- The P values of the ME-Trait correlations in infant placentas.csv	F8A- The P values of the ME-Tra	成功	总表!B3342:T3577
	F8B-DEG counts of SDMs.csv	F8B-DEG counts of SDMs	成功	总表!B3578:E3594
	F8B-significantly differential Module−trait relationships.csv	F8B-significantly differential	成功	总表!B3595:F3620
	F8C-module60.csv	F8C-module60	成功	总表!B3621:D3622
	F8D-editing level of SIGLEC6 at Chorion in Male.csv	F8D-editing level of SIGLEC6 at	成功	总表!B3623:H3654
	F9A&B-HUVEC-OvEd.csv	F9A&B-HUVEC-OvEd	成功	总表!B3655:F3755
	F9C&D-HUVEC-editing_number.csv	F9C&D-HUVEC-editing_number	成功	总表!B3756:F3856
	F9E-HUVEC-metadata of PCC.csv	F9E-HUVEC-metadata of PCC	成功	总表!B3857:D3907
	F9E-HUVEC-sampleDist of PCC.csv	F9E-HUVEC-sampleDist of PCC	成功	总表!B3908:AZ3958
	F9F-HUVEC-PCA.csv	F9F-HUVEC-PCA	成功	总表!B3959:G4009
	F10A-HUVEC-distribution of diffsites.csv	F10A-HUVEC-distribution of diff	成功	总表!B4010:D4030
	F10B-time_level_of_CTSB_8-11843176_wilcox.csv	F10B-time_level_of_CTSB_8-11843	成功	总表!B4031:F4069
	F10C-time_level_of_EMP2_16-10531456_wilcox.csv	F10C-time_level_of_EMP2_16-1053	成功	总表!B4070:F4085
	F10C-time_level_of_STK4_20-45078299_wilcox.csv	F10C-time_level_of_STK4_20-4507	成功	总表!B4086:F4094
	F10D-time_level_of_FAM20B_wilcox.csv	F10D-time_level_of_FAM20B_wilco	成功	总表!B4095:F4139
	F10E-time_level_of_GATD1_wilcox.csv	F10E-time_level_of_GATD1_wilcox	成功	总表!B4140:F4178
	F10F-time_level_of_SPPL2A_wilcox.csv	F10F-time_level_of_SPPL2A_wilco	成功	总表!B4179:F4223
	SF1A-Amnion-nonRP-OvEd-Wilcoxon.csv	SF1A-Amnion-nonRP-OvEd-Wilcoxon	成功	总表!B4224:G4294
	SF1B-Chorionic Plate-nonRP-OvEd-Wilcoxon.csv	SF1B-Chorionic Plate-nonRP-OvEd	成功	总表!B4295:G4365
	SF1C-Chorion-nonRP-OvEd-Wilcoxon.csv	SF1C-Chorion-nonRP-OvEd-Wilcoxo	成功	总表!B4366:G4435
	SF1D-Umbilical Cord-nonRP-OvEd-Wilcoxon.csv	SF1D-Umbilical Cord-nonRP-OvEd-	成功	总表!B4436:G4503
	SF1E-Villus of Maternal-nonRP-OvEd-Wilcoxon.csv	SF1E-Villus of Maternal-nonRP-O	成功	总表!B4504:G4574
	SF1F-Villus of Intermediate-nonRP-OvEd-Wilcoxon.csv	SF1F-Villus of Intermediate-non	成功	总表!B4575:G4645
	SF1G-Villus of Fetal-nonRP-OvEd-Wilcoxon.csv	SF1G-Villus of Fetal-nonRP-OvEd	成功	总表!B4646:G4716
	SF2A-Venn of Male vs Female in DES counts.csv	SF2A-Venn of Male vs Female in	成功	总表!B4717:D4718
	SF2B-editing level of METTL7A_12-50931636 each tissue in Male.csv	SF2B-editing level of METTL7A_1	成功	总表!B4719:F4748
	SF2B-editing level of STK4_20-45078299 each tissue in Female.csv	SF2B-editing level of STK4_20-4	成功	总表!B4749:F4775
	SF2C-editing level of RPS19 at Amnion in Male.csv	SF2C-editing level of RPS19 at	成功	总表!B4776:L4812
	SF3-GO-of-module60-DES_enrichment_results.xlsx	Sheet 1	成功	总表!B4813:J5000
	SF4A-module78.csv	SF4A-module78	成功	总表!B5001:G5430
	SF4B-editing level of INTS11_1-1317996 at Chorion in Female.csv	SF4B-editing level of INTS11_1-	成功	总表!B5431:G5454

## Sheet: 总表
Editing_type	group	Count
A>C	All	110
A>G	All	11119
A>T	All	113
C>A	All	159
C>G	All	134
C>T	All	692
G>A	All	677
G>C	All	154
G>T	All	143
T>A	All	100
T>C	All	11004
T>G	All	119
A>C	Repeat	0
A>G	Repeat	10297
A>T	Repeat	7
C>A	Repeat	43
C>G	Repeat	2
C>T	Repeat	40
G>A	Repeat	35
G>C	Repeat	0
G>T	Repeat	10
T>A	Repeat	2
T>C	Repeat	10188
T>G	Repeat	0
A>C	Non_repeat	110
A>G	Non_repeat	822
A>T	Non_repeat	106
C>A	Non_repeat	116
C>G	Non_repeat	132
C>T	Non_repeat	652
G>A	Non_repeat	642
G>C	Non_repeat	154
G>T	Non_repeat	133
T>A	Non_repeat	98
T>C	Non_repeat	816
T>G	Non_repeat	119
Editing_type	group	Count
A>C	All	88
A>G	All	9674
A>T	All	76
C>A	All	136
C>G	All	113
C>T	All	502
G>A	All	508
G>C	All	118
G>T	All	104
T>A	All	70
T>C	All	9392
T>G	All	99
A>C	Repeat	0
A>G	Repeat	9031
A>T	Repeat	5
C>A	Repeat	37
C>G	Repeat	1
C>T	Repeat	34
G>A	Repeat	27
G>C	Repeat	0
G>T	Repeat	9
T>A	Repeat	2
T>C	Repeat	8771
T>G	Repeat	0
A>C	Non_repeat	88
A>G	Non_repeat	643
A>T	Non_repeat	71
C>A	Non_repeat	99
C>G	Non_repeat	112
C>T	Non_repeat	468
G>A	Non_repeat	481
G>C	Non_repeat	118
G>T	Non_repeat	95
T>A	Non_repeat	68
T>C	Non_repeat	621
T>G	Non_repeat	99
Region	group	Count
UTR3	ALL	9354
intronic	ALL	4946
ncRNA_exonic	ALL	4186
ncRNA_intronic	ALL	3464
intergenic	ALL	1126
downstream	ALL	634
exonic	ALL	412
upstream	ALL	220
UTR5	ALL	153
splicing	ALL	87
ncRNA_splicing	ALL	6
UTR3	Repeat	8793
intronic	Repeat	4721
ncRNA_exonic	Repeat	1691
ncRNA_intronic	Repeat	3384
intergenic	Repeat	1104
downstream	Repeat	606
exonic	Repeat	83
upstream	Repeat	172
UTR5	Repeat	98
splicing	Repeat	20
ncRNA_splicing	Repeat	6
UTR3	Non-repeat	561
intronic	Non-repeat	225
ncRNA_exonic	Non-repeat	2495
ncRNA_intronic	Non-repeat	80
intergenic	Non-repeat	22
downstream	Non-repeat	28
exonic	Non-repeat	329
upstream	Non-repeat	48
UTR5	Non-repeat	55
splicing	Non-repeat	67
ncRNA_splicing	Non-repeat	0
Region	group	Count
UTR3	ALL	8141
intronic	ALL	4176
ncRNA_exonic	ALL	3399
ncRNA_intronic	ALL	2986
intergenic	ALL	991
downstream	ALL	548
exonic	ALL	299
upstream	ALL	186
UTR5	ALL	127
splicing	ALL	70
ncRNA_splicing	ALL	4
UTR3	Repeat	7728
intronic	Repeat	3995
ncRNA_exonic	Repeat	1474
ncRNA_intronic	Repeat	2932
intergenic	Repeat	979
downstream	Repeat	529
exonic	Repeat	69
upstream	Repeat	136
UTR5	Repeat	93
splicing	Repeat	18
ncRNA_splicing	Repeat	4
UTR3	Non-repeat	413
intronic	Non-repeat	181
ncRNA_exonic	Non-repeat	1925
ncRNA_intronic	Non-repeat	54
intergenic	Non-repeat	12
downstream	Non-repeat	19
exonic	Non-repeat	230
upstream	Non-repeat	50
UTR5	Non-repeat	34
splicing	Non-repeat	52
ncRNA_splicing	Non-repeat	0
repeat_type	counts	percent
Alu-SINE	20299	98.6969417027277
Other	198	0.962707249477318
L1-LINE	70	0.340351047795011
repeat_type	counts	percent
Alu-SINE	17652	98.7634980137638
Other	164	0.917585184356292
L1-LINE	57	0.318916801879931
type	group	Count
repeat	known	19823
nonRP	known	510
repeat	new	801
nonRP	new	3390
type	group	Count
repeat	known	17215
nonRP	known	410
repeat	new	702
nonRP	new	2553
ovED(%)	tissue	sample	sex	ren	type
23.4190655969797	Amnion	K0031964AN	Male	Tibetan	repeat
22.6114048974368	Amnion	K0031965AN	Male	Tibetan	repeat
23.808841249009	Amnion	K0033586AN	Male	Tibetan	repeat
17.8010627835055	Amnion	K0033644AN	Male	Tibetan	repeat
20.8450140709522	Amnion	K0033676AN	Male	Tibetan	repeat
24.8386895280927	Amnion	K0033720AN	Male	Tibetan	repeat
19.3664234680377	Amnion	K0035006AN	Male	Tibetan	repeat
20.5669410871723	Amnion	K0036067AN	Male	Tibetan	repeat
22.5291256456115	Amnion	K0036081AN	Male	Tibetan	repeat
22.1454540145133	Amnion	K0036099AN	Male	Tibetan	repeat
26.8732031022988	Amnion	K0036160AN	Male	Tibetan	repeat
21.4483384167101	Amnion	K0036226AN	Male	Tibetan	repeat
25.2550286007535	Amnion	K0036241AN	Male	Tibetan	repeat
26.885129859231	Amnion	K0036243AN	Male	Tibetan	repeat
29.2643202390079	Amnion	K0036456AN	Male	Tibetan	repeat
22.6209825687047	Amnion	K0036495AN	Male	Tibetan	repeat
27.8690245924288	Amnion	K0031857AN	Female	Tibetan	repeat
20.7703486321374	Amnion	K0031954AN	Female	Tibetan	repeat
25.9607597940435	Amnion	K0031955AN	Female	Tibetan	repeat
17.06381388264	Amnion	K0034663AN	Female	Tibetan	repeat
20.835716950628	Amnion	K0034975AN	Female	Tibetan	repeat
24.8619689952123	Amnion	K0034979AN	Female	Tibetan	repeat
21.2375927747474	Amnion	K0035001AN	Female	Tibetan	repeat
19.9354994297953	Amnion	K0035003AN	Female	Tibetan	repeat
23.2284966750245	Amnion	K0035015AN	Female	Tibetan	repeat
17.3741184188945	Amnion	K0035567AN	Female	Tibetan	repeat
17.5029949842242	Amnion	K0035729AN	Female	Tibetan	repeat
19.0555034621027	Amnion	K0036133AN	Female	Tibetan	repeat
26.36572209741	Amnion	K0036158AN	Female	Tibetan	repeat
25.4973240086863	Amnion	K0036255AN	Female	Tibetan	repeat
20.8825622309012	Amnion	K0036273AN	Female	Tibetan	repeat
20.1632720288396	Amnion	K0036281AN	Female	Tibetan	repeat
20.5725320913325	Amnion	K0036296AN	Female	Tibetan	repeat
26.9246462480057	Amnion	K0037997AN	Female	Tibetan	repeat
23.9330405571619	Amnion	K0038033AN	Female	Tibetan	repeat
20.1618820657009	Amnion	HK0031819AN	Male	Han	repeat
18.8660051477456	Amnion	HK0031889AN	Male	Han	repeat
21.5919716863622	Amnion	HK0031938AN	Male	Han	repeat
18.8505769853412	Amnion	HK0032308AN	Male	Han	repeat
23.607437458331	Amnion	HK0032413AN	Male	Han	repeat
23.4418649845745	Amnion	HK0032783AN	Male	Han	repeat
19.3404883880436	Amnion	HK0033417AN	Male	Han	repeat
19.9887585745556	Amnion	HK0033558AN	Male	Han	repeat
21.7399162950428	Amnion	HK0034268AN	Male	Han	repeat
19.2857769993946	Amnion	HK0034395AN	Male	Han	repeat
17.5668768925148	Amnion	HK0034425AN	Male	Han	repeat
21.639252456684	Amnion	HK0034896AN	Male	Han	repeat
19.9628583881298	Amnion	HK0034926AN	Male	Han	repeat
29.3161725273883	Amnion	HK0035692AN	Male	Han	repeat
17.7077929631621	Amnion	HK0036112AN	Male	Han	repeat
21.0912009751094	Amnion	HK0036250AN	Male	Han	repeat
21.4559767632818	Amnion	HK0036297AN	Male	Han	repeat
21.4513523124697	Amnion	HK0036922AN	Male	Han	repeat
30.6130291591994	Amnion	HK0037408AN	Male	Han	repeat
21.9066894796144	Amnion	HK0037935AN	Male	Han	repeat
21.6844164611548	Amnion	HK0032280AN	Female	Han	repeat
25.157503120204	Amnion	HK0032412AN	Female	Han	repeat
23.9080029643326	Amnion	HK0032437AN	Female	Han	repeat
29.2427170857021	Amnion	HK0032839AN	Female	Han	repeat
24.4064265883013	Amnion	HK0033518AN	Female	Han	repeat
18.065165161611	Amnion	HK0033575AN	Female	Han	repeat
20.7015850269368	Amnion	HK0033622AN	Female	Han	repeat
33.3432712920766	Amnion	HK0034023AN	Female	Han	repeat
19.2120433452234	Amnion	HK0034431AN	Female	Han	repeat
20.8613490678847	Amnion	HK0034640AN	Female	Han	repeat
19.6395523045739	Amnion	HK0034916AN	Female	Han	repeat
23.9870254670303	Amnion	HK0034921AN	Female	Han	repeat
17.884979091272	Amnion	HK0035971AN	Female	Han	repeat
31.7568276674928	Amnion	HK0036075AN	Female	Han	repeat
19.6523149266979	Amnion	HK0036876AN	Female	Han	repeat
ovED(%)	tissue	sample	sex	ren	type
22.9342961268671	Chorionic Plate	K0031964CN	Male	Tibetan	repeat
27.0056359087903	Chorionic Plate	K0031965CN	Male	Tibetan	repeat
28.908632398391	Chorionic Plate	K0033586CN	Male	Tibetan	repeat
22.7697186820931	Chorionic Plate	K0033644CN	Male	Tibetan	repeat
28.1850471643182	Chorionic Plate	K0033676CN	Male	Tibetan	repeat
22.2425149987388	Chorionic Plate	K0033720CN	Male	Tibetan	repeat
25.3502422829523	Chorionic Plate	K0035006CN	Male	Tibetan	repeat
27.0764042561649	Chorionic Plate	K0036067CN	Male	Tibetan	repeat
20.2456874316196	Chorionic Plate	K0036081CN	Male	Tibetan	repeat
22.7375054961161	Chorionic Plate	K0036099CN	Male	Tibetan	repeat
30.2400833541229	Chorionic Plate	K0036160CN	Male	Tibetan	repeat
27.5850674865135	Chorionic Plate	K0036226CN	Male	Tibetan	repeat
23.9120679064409	Chorionic Plate	K0036241CN	Male	Tibetan	repeat
25.4821817600384	Chorionic Plate	K0036243CN	Male	Tibetan	repeat
22.7692549848501	Chorionic Plate	K0036456CN	Male	Tibetan	repeat
22.8127692342882	Chorionic Plate	K0036495CN	Male	Tibetan	repeat
21.527752444185	Chorionic Plate	K0031857CN	Female	Tibetan	repeat
25.3017310850173	Chorionic Plate	K0031954CN	Female	Tibetan	repeat
23.4085036132422	Chorionic Plate	K0031955CN	Female	Tibetan	repeat
23.2406213417612	Chorionic Plate	K0034663CN	Female	Tibetan	repeat
27.7146358008306	Chorionic Plate	K0034975CN	Female	Tibetan	repeat
23.177686472439	Chorionic Plate	K0034979CN	Female	Tibetan	repeat
24.1959552605773	Chorionic Plate	K0035001CN	Female	Tibetan	repeat
22.6246749662255	Chorionic Plate	K0035003CN	Female	Tibetan	repeat
24.8892370603207	Chorionic Plate	K0035015CN	Female	Tibetan	repeat
23.9887517841868	Chorionic Plate	K0035567CN	Female	Tibetan	repeat
27.6406055518569	Chorionic Plate	K0035729CN	Female	Tibetan	repeat
24.0636468637642	Chorionic Plate	K0036133CN	Female	Tibetan	repeat
22.8398677373642	Chorionic Plate	K0036158CN	Female	Tibetan	repeat
29.0011107911301	Chorionic Plate	K0036255CN	Female	Tibetan	repeat
27.8181302129361	Chorionic Plate	K0036273CN	Female	Tibetan	repeat
24.3242894556902	Chorionic Plate	K0036281CN	Female	Tibetan	repeat
24.3240960881371	Chorionic Plate	K0036296CN	Female	Tibetan	repeat
24.3333383154582	Chorionic Plate	K0037997CN	Female	Tibetan	repeat
23.8651423807333	Chorionic Plate	K0038033CN	Female	Tibetan	repeat
26.5630132486587	Chorionic Plate	HK0031819CN	Male	Han	repeat
24.0232599618781	Chorionic Plate	HK0031889CN	Male	Han	repeat
24.6864556595983	Chorionic Plate	HK0031938CN	Male	Han	repeat
23.6651068969966	Chorionic Plate	HK0032308CN	Male	Han	repeat
23.4249530628666	Chorionic Plate	HK0032413CN	Male	Han	repeat
22.6577960511453	Chorionic Plate	HK0032783CN	Male	Han	repeat
26.6461566578839	Chorionic Plate	HK0033417CN	Male	Han	repeat
23.9206042248379	Chorionic Plate	HK0033558CN	Male	Han	repeat
26.4102278903927	Chorionic Plate	HK0034268CN	Male	Han	repeat
26.383127317876	Chorionic Plate	HK0034395CN	Male	Han	repeat
23.1351843477375	Chorionic Plate	HK0034425CN	Male	Han	repeat
24.0065646511769	Chorionic Plate	HK0034896CN	Male	Han	repeat
24.5503130798121	Chorionic Plate	HK0034926CN	Male	Han	repeat
22.0536316885141	Chorionic Plate	HK0035692CN	Male	Han	repeat
22.063844245585	Chorionic Plate	HK0036112CN	Male	Han	repeat
23.6164869881275	Chorionic Plate	HK0036250CN	Male	Han	repeat
22.793260531556	Chorionic Plate	HK0036297CN	Male	Han	repeat
23.8202702730656	Chorionic Plate	HK0036922CN	Male	Han	repeat
23.5169587233012	Chorionic Plate	HK0037408CN	Male	Han	repeat
22.7882451765095	Chorionic Plate	HK0037935CN	Male	Han	repeat
25.0451928606617	Chorionic Plate	HK0032280CN	Female	Han	repeat
26.2546529683279	Chorionic Plate	HK0032412CN	Female	Han	repeat
26.7463563798102	Chorionic Plate	HK0032437CN	Female	Han	repeat
23.3094291803468	Chorionic Plate	HK0032839CN	Female	Han	repeat
23.9622712318143	Chorionic Plate	HK0033518CN	Female	Han	repeat
23.7778269578886	Chorionic Plate	HK0033575CN	Female	Han	repeat
27.5776195378025	Chorionic Plate	HK0033622CN	Female	Han	repeat
26.9246258781715	Chorionic Plate	HK0034023CN	Female	Han	repeat
25.3398008800147	Chorionic Plate	HK0034431CN	Female	Han	repeat
23.9441768512913	Chorionic Plate	HK0034640CN	Female	Han	repeat
23.8717296690933	Chorionic Plate	HK0034916CN	Female	Han	repeat
25.417673164429	Chorionic Plate	HK0034921CN	Female	Han	repeat
24.9917263792776	Chorionic Plate	HK0035971CN	Female	Han	repeat
24.8450400942836	Chorionic Plate	HK0036075CN	Female	Han	repeat
24.1397809301978	Chorionic Plate	HK0036876CN	Female	Han	repeat
ovED(%)	tissue	sample	sex	ren	type
21.8800836176617	Chorion	K0031964BCN	Male	Tibetan	repeat
26.7464740343472	Chorion	K0031965BCN	Male	Tibetan	repeat
21.1693835804913	Chorion	K0033586BCN	Male	Tibetan	repeat
22.5015881138501	Chorion	K0033644BCN	Male	Tibetan	repeat
22.2661947049634	Chorion	K0033676BCN	Male	Tibetan	repeat
24.2334431378557	Chorion	K0033720BCN	Male	Tibetan	repeat
21.6974017230948	Chorion	K0035006BCN	Male	Tibetan	repeat
24.21467826913	Chorion	K0036067BCN	Male	Tibetan	repeat
21.7051656572854	Chorion	K0036081BCN	Male	Tibetan	repeat
24.8085205500724	Chorion	K0036099BCN	Male	Tibetan	repeat
25.0566460175562	Chorion	K0036160BCN	Male	Tibetan	repeat
24.6723706136667	Chorion	K0036226BCN	Male	Tibetan	repeat
25.7968160891457	Chorion	K0036241BCN	Male	Tibetan	repeat
24.2537952914074	Chorion	K0036243BCN	Male	Tibetan	repeat
24.7552487751384	Chorion	K0036456BCN	Male	Tibetan	repeat
26.5655134311103	Chorion	K0036495BCN	Male	Tibetan	repeat
25.130119023603	Chorion	K0031857BCN	Female	Tibetan	repeat
24.8190885484813	Chorion	K0031954BCN	Female	Tibetan	repeat
27.3890587504416	Chorion	K0031955BCN	Female	Tibetan	repeat
27.1839410727277	Chorion	K0034663BCN	Female	Tibetan	repeat
27.5936751941898	Chorion	K0034975BCN	Female	Tibetan	repeat
22.9816460842823	Chorion	K0034979BCN	Female	Tibetan	repeat
21.4522577588861	Chorion	K0035001BCN	Female	Tibetan	repeat
26.8363477999295	Chorion	K0035003BCN	Female	Tibetan	repeat
23.2949683503057	Chorion	K0035015BCN	Female	Tibetan	repeat
24.3537132652408	Chorion	K0035567BCN	Female	Tibetan	repeat
24.1783535082171	Chorion	K0035729BCN	Female	Tibetan	repeat
21.9377173706752	Chorion	K0036133BCN	Female	Tibetan	repeat
25.626811289217	Chorion	K0036158BCN	Female	Tibetan	repeat
29.034641447299	Chorion	K0036255BCN	Female	Tibetan	repeat
25.9348949424749	Chorion	K0036273BCN	Female	Tibetan	repeat
22.771539279393	Chorion	K0036281BCN	Female	Tibetan	repeat
23.4893539332253	Chorion	K0036296BCN	Female	Tibetan	repeat
27.487600407947	Chorion	K0037997BCN	Female	Tibetan	repeat
22.1652154286597	Chorion	K0038033BCN	Female	Tibetan	repeat
25.7153644842574	Chorion	HK0031819BCN	Male	Han	repeat
20.674123046981	Chorion	HK0031889BCN	Male	Han	repeat
23.0990791199578	Chorion	HK0031938BCN	Male	Han	repeat
23.3383073722269	Chorion	HK0032308BCN	Male	Han	repeat
20.4850988525282	Chorion	HK0032413BCN	Male	Han	repeat
20.1511581643437	Chorion	HK0032783BCN	Male	Han	repeat
24.1776095376282	Chorion	HK0033417BCN	Male	Han	repeat
23.6099714161471	Chorion	HK0033558BCN	Male	Han	repeat
24.3010457825919	Chorion	HK0034268BCN	Male	Han	repeat
26.1503599154349	Chorion	HK0034395BCN	Male	Han	repeat
20.6946978917231	Chorion	HK0034425BCN	Male	Han	repeat
24.3879580883666	Chorion	HK0034896BCN	Male	Han	repeat
24.7562591721371	Chorion	HK0034926BCN	Male	Han	repeat
22.2371520570709	Chorion	HK0035692BCN	Male	Han	repeat
24.0313787570601	Chorion	HK0036112BCN	Male	Han	repeat
23.4537324180058	Chorion	HK0036250BCN	Male	Han	repeat
23.9851799046102	Chorion	HK0036297BCN	Male	Han	repeat
25.0078083374672	Chorion	HK0036922BCN	Male	Han	repeat
24.4181803088942	Chorion	HK0037408BCN	Male	Han	repeat
21.6735741454126	Chorion	HK0037935BCN	Male	Han	repeat
20.870018058251	Chorion	HK0032280BCN	Female	Han	repeat
24.6388270252544	Chorion	HK0032412BCN	Female	Han	repeat
23.2096635030198	Chorion	HK0032437BCN	Female	Han	repeat
21.2835460959131	Chorion	HK0032839BCN	Female	Han	repeat
21.1605450039614	Chorion	HK0033518BCN	Female	Han	repeat
22.0101114403181	Chorion	HK0033575BCN	Female	Han	repeat
21.88270109463	Chorion	HK0033622BCN	Female	Han	repeat
21.5354031949462	Chorion	HK0034023BCN	Female	Han	repeat
22.0145358794662	Chorion	HK0034431BCN	Female	Han	repeat
24.5695175898382	Chorion	HK0034640BCN	Female	Han	repeat
25.9567246499788	Chorion	HK0034921BCN	Female	Han	repeat
23.1502757352941	Chorion	HK0035971BCN	Female	Han	repeat
23.9642377921934	Chorion	HK0036075BCN	Female	Han	repeat
25.8592088857299	Chorion	HK0036876BCN	Female	Han	repeat
ovED(%)	tissue	sample	sex	ren	type
25.3163189558705	Umbilical Cord	K0031964UC	Male	Tibetan	repeat
28.5164456125784	Umbilical Cord	K0031965UC	Male	Tibetan	repeat
28.8523077810131	Umbilical Cord	K0033586UC	Male	Tibetan	repeat
27.0004878697831	Umbilical Cord	K0033644UC	Male	Tibetan	repeat
27.9077304712577	Umbilical Cord	K0033676UC	Male	Tibetan	repeat
26.4233246694542	Umbilical Cord	K0033720UC	Male	Tibetan	repeat
28.5013920217846	Umbilical Cord	K0035006UC	Male	Tibetan	repeat
29.5358119058562	Umbilical Cord	K0036067UC	Male	Tibetan	repeat
21.6904971899081	Umbilical Cord	K0036081UC	Male	Tibetan	repeat
29.3557758566685	Umbilical Cord	K0036099UC	Male	Tibetan	repeat
29.4904853343087	Umbilical Cord	K0036160UC	Male	Tibetan	repeat
27.210130589632	Umbilical Cord	K0036226UC	Male	Tibetan	repeat
28.1936949823582	Umbilical Cord	K0036241UC	Male	Tibetan	repeat
29.3871141767177	Umbilical Cord	K0036243UC	Male	Tibetan	repeat
30.0059842561262	Umbilical Cord	K0036456UC	Male	Tibetan	repeat
29.230489867971	Umbilical Cord	K0036495UC	Male	Tibetan	repeat
26.0676780293729	Umbilical Cord	K0031857UC	Female	Tibetan	repeat
28.6129903715163	Umbilical Cord	K0031954UC	Female	Tibetan	repeat
23.6978629835773	Umbilical Cord	K0031955UC	Female	Tibetan	repeat
28.0443407616019	Umbilical Cord	K0034663UC	Female	Tibetan	repeat
30.1439205955335	Umbilical Cord	K0034975UC	Female	Tibetan	repeat
29.7912769085731	Umbilical Cord	K0034979UC	Female	Tibetan	repeat
27.9949671969084	Umbilical Cord	K0035001UC	Female	Tibetan	repeat
26.6270636082174	Umbilical Cord	K0035003UC	Female	Tibetan	repeat
28.7795648060549	Umbilical Cord	K0035015UC	Female	Tibetan	repeat
26.5623160485899	Umbilical Cord	K0035567UC	Female	Tibetan	repeat
29.6086537717874	Umbilical Cord	K0035729UC	Female	Tibetan	repeat
28.180074486294	Umbilical Cord	K0036133UC	Female	Tibetan	repeat
24.7118728009988	Umbilical Cord	K0036158UC	Female	Tibetan	repeat
28.9181705337535	Umbilical Cord	K0036255UC	Female	Tibetan	repeat
28.4270418340529	Umbilical Cord	K0036273UC	Female	Tibetan	repeat
26.0296540362438	Umbilical Cord	K0036281UC	Female	Tibetan	repeat
27.0419266712244	Umbilical Cord	K0036296UC	Female	Tibetan	repeat
26.7543452966706	Umbilical Cord	K0037997UC	Female	Tibetan	repeat
27.9549708965104	Umbilical Cord	K0038033UC	Female	Tibetan	repeat
25.8856446719002	Umbilical Cord	HK0031819UC	Male	Han	repeat
26.5509962267624	Umbilical Cord	HK0031889UC	Male	Han	repeat
28.2859073167452	Umbilical Cord	HK0031938UC	Male	Han	repeat
27.9630183614563	Umbilical Cord	HK0032308UC	Male	Han	repeat
23.4836143131011	Umbilical Cord	HK0032413UC	Male	Han	repeat
27.6202118804561	Umbilical Cord	HK0032783UC	Male	Han	repeat
24.4366089567265	Umbilical Cord	HK0033417UC	Male	Han	repeat
27.2858916011585	Umbilical Cord	HK0033558UC	Male	Han	repeat
27.0955663013785	Umbilical Cord	HK0034268UC	Male	Han	repeat
27.6799911762273	Umbilical Cord	HK0034395UC	Male	Han	repeat
25.2958980781245	Umbilical Cord	HK0034425UC	Male	Han	repeat
26.2322386397514	Umbilical Cord	HK0034896UC	Male	Han	repeat
25.8540270582357	Umbilical Cord	HK0034926UC	Male	Han	repeat
26.4249372193275	Umbilical Cord	HK0036112UC	Male	Han	repeat
24.8020021733061	Umbilical Cord	HK0036250UC	Male	Han	repeat
24.4967547855065	Umbilical Cord	HK0036297UC	Male	Han	repeat
27.003110613413	Umbilical Cord	HK0036922UC	Male	Han	repeat
26.771325426341	Umbilical Cord	HK0037408UC	Male	Han	repeat
28.0626431031367	Umbilical Cord	HK0037935UC	Male	Han	repeat
27.8064635755811	Umbilical Cord	HK0032280UC	Female	Han	repeat
25.3651794736697	Umbilical Cord	HK0032412UC	Female	Han	repeat
29.0450902199234	Umbilical Cord	HK0032437UC	Female	Han	repeat
23.6079377613433	Umbilical Cord	HK0032839UC	Female	Han	repeat
26.2169189102115	Umbilical Cord	HK0033518UC	Female	Han	repeat
25.5742537515688	Umbilical Cord	HK0033622UC	Female	Han	repeat
29.6855809034254	Umbilical Cord	HK0034023UC	Female	Han	repeat
25.9822611406534	Umbilical Cord	HK0034431UC	Female	Han	repeat
24.1291735368528	Umbilical Cord	HK0034640UC	Female	Han	repeat
17.5381592739315	Umbilical Cord	HK0034916UC	Female	Han	repeat
26.8784759028272	Umbilical Cord	HK0034921UC	Female	Han	repeat
26.6168156357807	Umbilical Cord	HK0035971UC	Female	Han	repeat
25.670011614737	Umbilical Cord	HK0036075UC	Female	Han	repeat
ovED(%)	tissue	sample	sex	ren	type
19.315840637514	Villus of Maternal	K0031964VM	Male	Tibetan	repeat
21.9554303444264	Villus of Maternal	K0031965VM	Male	Tibetan	repeat
22.9549724329963	Villus of Maternal	K0033586VM	Male	Tibetan	repeat
21.765927689853	Villus of Maternal	K0033644VM	Male	Tibetan	repeat
24.8187889431373	Villus of Maternal	K0033676VM	Male	Tibetan	repeat
21.4844910100927	Villus of Maternal	K0033720VM	Male	Tibetan	repeat
24.2959485264605	Villus of Maternal	K0035006VM	Male	Tibetan	repeat
23.5555777033495	Villus of Maternal	K0036067VM	Male	Tibetan	repeat
20.0610826330044	Villus of Maternal	K0036081VM	Male	Tibetan	repeat
23.145113157148	Villus of Maternal	K0036099VM	Male	Tibetan	repeat
24.5420827512275	Villus of Maternal	K0036160VM	Male	Tibetan	repeat
24.5836441981211	Villus of Maternal	K0036226VM	Male	Tibetan	repeat
23.9231555940879	Villus of Maternal	K0036241VM	Male	Tibetan	repeat
22.6280828743225	Villus of Maternal	K0036243VM	Male	Tibetan	repeat
22.9888747400599	Villus of Maternal	K0036456VM	Male	Tibetan	repeat
21.64823145817	Villus of Maternal	K0036495VM	Male	Tibetan	repeat
22.2866934070641	Villus of Maternal	K0031857VM	Female	Tibetan	repeat
23.8189168964888	Villus of Maternal	K0031954VM	Female	Tibetan	repeat
22.2665455920232	Villus of Maternal	K0031955VM	Female	Tibetan	repeat
22.7836304700162	Villus of Maternal	K0034663VM	Female	Tibetan	repeat
23.1247595845621	Villus of Maternal	K0034975VM	Female	Tibetan	repeat
22.8321691109242	Villus of Maternal	K0034979VM	Female	Tibetan	repeat
21.5368052677113	Villus of Maternal	K0035001VM	Female	Tibetan	repeat
22.6360324680152	Villus of Maternal	K0035003VM	Female	Tibetan	repeat
22.961266821109	Villus of Maternal	K0035015VM	Female	Tibetan	repeat
22.3400945744151	Villus of Maternal	K0035567VM	Female	Tibetan	repeat
28.0914164875546	Villus of Maternal	K0035729VM	Female	Tibetan	repeat
25.1498867333208	Villus of Maternal	K0036133VM	Female	Tibetan	repeat
21.9243072985875	Villus of Maternal	K0036158VM	Female	Tibetan	repeat
23.6169431030863	Villus of Maternal	K0036255VM	Female	Tibetan	repeat
23.6103775318054	Villus of Maternal	K0036273VM	Female	Tibetan	repeat
23.6839189763096	Villus of Maternal	K0036281VM	Female	Tibetan	repeat
24.1927118239089	Villus of Maternal	K0036296VM	Female	Tibetan	repeat
22.648405814713	Villus of Maternal	K0037997VM	Female	Tibetan	repeat
23.8707765493411	Villus of Maternal	K0038033VM	Female	Tibetan	repeat
25.5404132735029	Villus of Maternal	HK0031819VM	Male	Han	repeat
23.2714834576975	Villus of Maternal	HK0031889VM	Male	Han	repeat
20.4533280708184	Villus of Maternal	HK0031938VM	Male	Han	repeat
20.3490573615303	Villus of Maternal	HK0032308VM	Male	Han	repeat
24.6478460920355	Villus of Maternal	HK0032413VM	Male	Han	repeat
21.4258939513709	Villus of Maternal	HK0032783VM	Male	Han	repeat
26.669539694372	Villus of Maternal	HK0033417VM	Male	Han	repeat
21.9747681776575	Villus of Maternal	HK0033558VM	Male	Han	repeat
22.0320174062883	Villus of Maternal	HK0034268VM	Male	Han	repeat
22.1700052435803	Villus of Maternal	HK0034395VM	Male	Han	repeat
20.8924315424691	Villus of Maternal	HK0034425VM	Male	Han	repeat
22.439165530304	Villus of Maternal	HK0034896VM	Male	Han	repeat
21.9572662429889	Villus of Maternal	HK0034926VM	Male	Han	repeat
21.0225253243291	Villus of Maternal	HK0035692VM	Male	Han	repeat
21.1556290670091	Villus of Maternal	HK0036112VM	Male	Han	repeat
21.2009177433285	Villus of Maternal	HK0036250VM	Male	Han	repeat
24.1311917611774	Villus of Maternal	HK0036297VM	Male	Han	repeat
22.3982905446577	Villus of Maternal	HK0036922VM	Male	Han	repeat
19.974702865083	Villus of Maternal	HK0037408VM	Male	Han	repeat
19.5887236075234	Villus of Maternal	HK0037935VM	Male	Han	repeat
23.4140187786272	Villus of Maternal	HK0032280VM	Female	Han	repeat
23.7627966810853	Villus of Maternal	HK0032412VM	Female	Han	repeat
22.5869107732545	Villus of Maternal	HK0032437VM	Female	Han	repeat
23.4041901238764	Villus of Maternal	HK0032839VM	Female	Han	repeat
19.9932332470327	Villus of Maternal	HK0033518VM	Female	Han	repeat
22.660885045998	Villus of Maternal	HK0033575VM	Female	Han	repeat
22.081396331671	Villus of Maternal	HK0033622VM	Female	Han	repeat
20.6475008192756	Villus of Maternal	HK0034023VM	Female	Han	repeat
22.3050387057678	Villus of Maternal	HK0034431VM	Female	Han	repeat
20.4730442507357	Villus of Maternal	HK0034640VM	Female	Han	repeat
22.4223899970615	Villus of Maternal	HK0034916VM	Female	Han	repeat
22.070761180383	Villus of Maternal	HK0034921VM	Female	Han	repeat
21.6934439717579	Villus of Maternal	HK0035971VM	Female	Han	repeat
22.7244342154377	Villus of Maternal	HK0036075VM	Female	Han	repeat
21.9392241294004	Villus of Maternal	HK0036876VM	Female	Han	repeat
ovED(%)	tissue	sample	sex	ren	type
21.1799472846788	Villus of Intermediate	K0031964VI	Male	Tibetan	repeat
21.9717134907001	Villus of Intermediate	K0031965VI	Male	Tibetan	repeat
22.7223386393513	Villus of Intermediate	K0033586VI	Male	Tibetan	repeat
23.9680269863968	Villus of Intermediate	K0033644VI	Male	Tibetan	repeat
28.8278396835409	Villus of Intermediate	K0033676VI	Male	Tibetan	repeat
20.908365034604	Villus of Intermediate	K0033720VI	Male	Tibetan	repeat
24.5371461046925	Villus of Intermediate	K0035006VI	Male	Tibetan	repeat
24.4926504803876	Villus of Intermediate	K0036067VI	Male	Tibetan	repeat
20.4961916500743	Villus of Intermediate	K0036081VI	Male	Tibetan	repeat
23.0420576899248	Villus of Intermediate	K0036099VI	Male	Tibetan	repeat
23.5826309280065	Villus of Intermediate	K0036160VI	Male	Tibetan	repeat
23.9453434958906	Villus of Intermediate	K0036226VI	Male	Tibetan	repeat
21.5662722633172	Villus of Intermediate	K0036241VI	Male	Tibetan	repeat
21.5547760526188	Villus of Intermediate	K0036243VI	Male	Tibetan	repeat
21.3111336753838	Villus of Intermediate	K0036456VI	Male	Tibetan	repeat
21.2951402607665	Villus of Intermediate	K0036495VI	Male	Tibetan	repeat
24.4002618574988	Villus of Intermediate	K0031857VI	Female	Tibetan	repeat
25.4016140729678	Villus of Intermediate	K0031954VI	Female	Tibetan	repeat
24.417365945504	Villus of Intermediate	K0031955VI	Female	Tibetan	repeat
23.1868332095955	Villus of Intermediate	K0034663VI	Female	Tibetan	repeat
22.0383179015756	Villus of Intermediate	K0034975VI	Female	Tibetan	repeat
23.2982783102591	Villus of Intermediate	K0034979VI	Female	Tibetan	repeat
22.1546955443041	Villus of Intermediate	K0035001VI	Female	Tibetan	repeat
24.0496608628318	Villus of Intermediate	K0035003VI	Female	Tibetan	repeat
22.8354733002205	Villus of Intermediate	K0035015VI	Female	Tibetan	repeat
24.499906162586	Villus of Intermediate	K0035567VI	Female	Tibetan	repeat
28.7823127318203	Villus of Intermediate	K0035729VI	Female	Tibetan	repeat
24.453132474581	Villus of Intermediate	K0036133VI	Female	Tibetan	repeat
23.6206031684524	Villus of Intermediate	K0036158VI	Female	Tibetan	repeat
23.8558993879193	Villus of Intermediate	K0036255VI	Female	Tibetan	repeat
27.0359748873363	Villus of Intermediate	K0036273VI	Female	Tibetan	repeat
22.3586548153578	Villus of Intermediate	K0036281VI	Female	Tibetan	repeat
23.7965114145455	Villus of Intermediate	K0036296VI	Female	Tibetan	repeat
22.977362989172	Villus of Intermediate	K0037997VI	Female	Tibetan	repeat
23.9581844763716	Villus of Intermediate	K0038033VI	Female	Tibetan	repeat
26.2497930044711	Villus of Intermediate	HK0031819VI	Male	Han	repeat
23.2553555518761	Villus of Intermediate	HK0031889VI	Male	Han	repeat
20.084273767014	Villus of Intermediate	HK0031938VI	Male	Han	repeat
23.9584150305439	Villus of Intermediate	HK0032308VI	Male	Han	repeat
22.711369141451	Villus of Intermediate	HK0032413VI	Male	Han	repeat
19.6601348563095	Villus of Intermediate	HK0032783VI	Male	Han	repeat
24.2430717233074	Villus of Intermediate	HK0033417VI	Male	Han	repeat
20.3724661283439	Villus of Intermediate	HK0033558VI	Male	Han	repeat
22.0558488930892	Villus of Intermediate	HK0034268VI	Male	Han	repeat
22.2292691440694	Villus of Intermediate	HK0034395VI	Male	Han	repeat
21.7758957345722	Villus of Intermediate	HK0034425VI	Male	Han	repeat
21.5863105240207	Villus of Intermediate	HK0034896VI	Male	Han	repeat
22.702682465697	Villus of Intermediate	HK0034926VI	Male	Han	repeat
20.9525179166367	Villus of Intermediate	HK0035692VI	Male	Han	repeat
19.8975852284478	Villus of Intermediate	HK0036112VI	Male	Han	repeat
18.9945496986532	Villus of Intermediate	HK0036250VI	Male	Han	repeat
22.9322403160888	Villus of Intermediate	HK0036297VI	Male	Han	repeat
22.3030417980512	Villus of Intermediate	HK0036922VI	Male	Han	repeat
20.5188528646457	Villus of Intermediate	HK0037408VI	Male	Han	repeat
20.8328380876915	Villus of Intermediate	HK0037935VI	Male	Han	repeat
24.6339023004587	Villus of Intermediate	HK0032280VI	Female	Han	repeat
24.4827838464788	Villus of Intermediate	HK0032412VI	Female	Han	repeat
21.8051555924192	Villus of Intermediate	HK0032437VI	Female	Han	repeat
22.1280600235136	Villus of Intermediate	HK0032839VI	Female	Han	repeat
19.8030634573304	Villus of Intermediate	HK0033518VI	Female	Han	repeat
23.2661337341124	Villus of Intermediate	HK0033575VI	Female	Han	repeat
24.1766513533648	Villus of Intermediate	HK0033622VI	Female	Han	repeat
22.2880812087976	Villus of Intermediate	HK0034023VI	Female	Han	repeat
20.1984262274076	Villus of Intermediate	HK0034431VI	Female	Han	repeat
21.6658279406796	Villus of Intermediate	HK0034640VI	Female	Han	repeat
23.4291012798719	Villus of Intermediate	HK0034916VI	Female	Han	repeat
21.3765452590977	Villus of Intermediate	HK0034921VI	Female	Han	repeat
20.0481404437037	Villus of Intermediate	HK0035971VI	Female	Han	repeat
21.2376101298885	Villus of Intermediate	HK0036075VI	Female	Han	repeat
22.1726454049375	Villus of Intermediate	HK0036876VI	Female	Han	repeat
ovED(%)	tissue	sample	sex	ren	type
22.659097317918	Villus of Fetal	K0031964VF	Male	Tibetan	repeat
22.8212535595566	Villus of Fetal	K0031965VF	Male	Tibetan	repeat
22.7788848070464	Villus of Fetal	K0033586VF	Male	Tibetan	repeat
22.2225563780563	Villus of Fetal	K0033644VF	Male	Tibetan	repeat
29.271451322168	Villus of Fetal	K0033676VF	Male	Tibetan	repeat
21.1780091754353	Villus of Fetal	K0033720VF	Male	Tibetan	repeat
24.7499491940835	Villus of Fetal	K0035006VF	Male	Tibetan	repeat
24.1739460691227	Villus of Fetal	K0036067VF	Male	Tibetan	repeat
19.9687192634515	Villus of Fetal	K0036081VF	Male	Tibetan	repeat
22.2790339717645	Villus of Fetal	K0036099VF	Male	Tibetan	repeat
22.9403089165057	Villus of Fetal	K0036160VF	Male	Tibetan	repeat
22.4695438767163	Villus of Fetal	K0036226VF	Male	Tibetan	repeat
21.4950363878868	Villus of Fetal	K0036241VF	Male	Tibetan	repeat
22.3072562358277	Villus of Fetal	K0036243VF	Male	Tibetan	repeat
20.8439047697969	Villus of Fetal	K0036456VF	Male	Tibetan	repeat
21.8217039677292	Villus of Fetal	K0036495VF	Male	Tibetan	repeat
21.988620955798	Villus of Fetal	K0031857VF	Female	Tibetan	repeat
22.8804302724865	Villus of Fetal	K0031954VF	Female	Tibetan	repeat
22.1962387000765	Villus of Fetal	K0031955VF	Female	Tibetan	repeat
22.4481241851568	Villus of Fetal	K0034663VF	Female	Tibetan	repeat
23.163651467602	Villus of Fetal	K0034975VF	Female	Tibetan	repeat
22.2383254167051	Villus of Fetal	K0034979VF	Female	Tibetan	repeat
22.4864088624474	Villus of Fetal	K0035001VF	Female	Tibetan	repeat
22.7708448933833	Villus of Fetal	K0035003VF	Female	Tibetan	repeat
23.7898413109048	Villus of Fetal	K0035015VF	Female	Tibetan	repeat
21.7084104863074	Villus of Fetal	K0035567VF	Female	Tibetan	repeat
33.0362902185412	Villus of Fetal	K0035729VF	Female	Tibetan	repeat
28.4992893750808	Villus of Fetal	K0036133VF	Female	Tibetan	repeat
22.0818032619755	Villus of Fetal	K0036158VF	Female	Tibetan	repeat
23.1181228501976	Villus of Fetal	K0036255VF	Female	Tibetan	repeat
24.0635535329906	Villus of Fetal	K0036273VF	Female	Tibetan	repeat
22.180154168823	Villus of Fetal	K0036281VF	Female	Tibetan	repeat
24.4073964285349	Villus of Fetal	K0036296VF	Female	Tibetan	repeat
23.6743652513969	Villus of Fetal	K0037997VF	Female	Tibetan	repeat
24.2662256314194	Villus of Fetal	K0038033VF	Female	Tibetan	repeat
25.7476222074762	Villus of Fetal	HK0031819VF	Male	Han	repeat
22.4291046041255	Villus of Fetal	HK0031889VF	Male	Han	repeat
20.7718688291487	Villus of Fetal	HK0031938VF	Male	Han	repeat
24.7912290996763	Villus of Fetal	HK0032308VF	Male	Han	repeat
22.3001867768735	Villus of Fetal	HK0032413VF	Male	Han	repeat
19.205000264471	Villus of Fetal	HK0032783VF	Male	Han	repeat
24.3094278116153	Villus of Fetal	HK0033417VF	Male	Han	repeat
21.7221349093617	Villus of Fetal	HK0033558VF	Male	Han	repeat
24.4390317565073	Villus of Fetal	HK0034268VF	Male	Han	repeat
22.0447747704195	Villus of Fetal	HK0034395VF	Male	Han	repeat
20.7088404962469	Villus of Fetal	HK0034425VF	Male	Han	repeat
23.783843511837	Villus of Fetal	HK0034896VF	Male	Han	repeat
22.0201115984842	Villus of Fetal	HK0034926VF	Male	Han	repeat
21.8589841400914	Villus of Fetal	HK0035692VF	Male	Han	repeat
20.7833035046479	Villus of Fetal	HK0036112VF	Male	Han	repeat
21.6748061536288	Villus of Fetal	HK0036250VF	Male	Han	repeat
22.1220810334518	Villus of Fetal	HK0036297VF	Male	Han	repeat
21.8390555341715	Villus of Fetal	HK0036922VF	Male	Han	repeat
20.4300720189008	Villus of Fetal	HK0037408VF	Male	Han	repeat
20.6693479728738	Villus of Fetal	HK0037935VF	Male	Han	repeat
23.4233201134744	Villus of Fetal	HK0032280VF	Female	Han	repeat
25.4519759696862	Villus of Fetal	HK0032412VF	Female	Han	repeat
21.4244383544913	Villus of Fetal	HK0032437VF	Female	Han	repeat
21.8320221787506	Villus of Fetal	HK0032839VF	Female	Han	repeat
19.7703746170861	Villus of Fetal	HK0033518VF	Female	Han	repeat
22.3904042326351	Villus of Fetal	HK0033575VF	Female	Han	repeat
23.1696849781587	Villus of Fetal	HK0033622VF	Female	Han	repeat
24.2708003110529	Villus of Fetal	HK0034023VF	Female	Han	repeat
22.9173809267259	Villus of Fetal	HK0034431VF	Female	Han	repeat
21.3331580084344	Villus of Fetal	HK0034640VF	Female	Han	repeat
21.3295369220819	Villus of Fetal	HK0034916VF	Female	Han	repeat
22.3132446467403	Villus of Fetal	HK0034921VF	Female	Han	repeat
21.9806811087583	Villus of Fetal	HK0035971VF	Female	Han	repeat
23.0488623022307	Villus of Fetal	HK0036075VF	Female	Han	repeat
22.973001023499	Villus of Fetal	HK0036876VF	Female	Han	repeat
	tissue	group	sex
HK0031819AN	Amnion	Han	M
HK0031819BCN	Chorion	Han	M
HK0031819CN	Chorionic Plate	Han	M
HK0031819UC	Umbilical Cord	Han	M
HK0031819VF	Villus of Fetal	Han	M
HK0031819VI	Villus of Intermediate	Han	M
HK0031819VM	Villus of Maternal	Han	M
HK0031889AN	Amnion	Han	M
HK0031889BCN	Chorion	Han	M
HK0031889CN	Chorionic Plate	Han	M
HK0031889UC	Umbilical Cord	Han	M
HK0031889VF	Villus of Fetal	Han	M
HK0031889VI	Villus of Intermediate	Han	M
HK0031889VM	Villus of Maternal	Han	M
HK0031938AN	Amnion	Han	M
HK0031938BCN	Chorion	Han	M
HK0031938CN	Chorionic Plate	Han	M
HK0031938UC	Umbilical Cord	Han	M
HK0031938VF	Villus of Fetal	Han	M
HK0031938VI	Villus of Intermediate	Han	M
HK0031938VM	Villus of Maternal	Han	M
HK0032280AN	Amnion	Han	F
HK0032280BCN	Chorion	Han	F
HK0032280CN	Chorionic Plate	Han	F
HK0032280UC	Umbilical Cord	Han	F
HK0032280VF	Villus of Fetal	Han	F
HK0032280VI	Villus of Intermediate	Han	F
HK0032280VM	Villus of Maternal	Han	F
HK0032308AN	Amnion	Han	M
HK0032308BCN	Chorion	Han	M
HK0032308CN	Chorionic Plate	Han	M
HK0032308UC	Umbilical Cord	Han	M
HK0032308VF	Villus of Fetal	Han	M
HK0032308VI	Villus of Intermediate	Han	M
HK0032308VM	Villus of Maternal	Han	M
HK0032412AN	Amnion	Han	F
HK0032412BCN	Chorion	Han	F
HK0032412CN	Chorionic Plate	Han	F
HK0032412UC	Umbilical Cord	Han	F
HK0032412VF	Villus of Fetal	Han	F
HK0032412VI	Villus of Intermediate	Han	F
HK0032412VM	Villus of Maternal	Han	F
HK0032413AN	Amnion	Han	M
HK0032413BCN	Chorion	Han	M
HK0032413CN	Chorionic Plate	Han	M
HK0032413UC	Umbilical Cord	Han	M
HK0032413VF	Villus of Fetal	Han	M
HK0032413VI	Villus of Intermediate	Han	M
HK0032413VM	Villus of Maternal	Han	M
HK0032437AN	Amnion	Han	F
HK0032437BCN	Chorion	Han	F
HK0032437CN	Chorionic Plate	Han	F
HK0032437UC	Umbilical Cord	Han	F
HK0032437VF	Villus of Fetal	Han	F
HK0032437VI	Villus of Intermediate	Han	F
HK0032437VM	Villus of Maternal	Han	F
HK0032783AN	Amnion	Han	M
HK0032783BCN	Chorion	Han	M
HK0032783CN	Chorionic Plate	Han	M
HK0032783UC	Umbilical Cord	Han	M
HK0032783VF	Villus of Fetal	Han	M
HK0032783VI	Villus of Intermediate	Han	M
HK0032783VM	Villus of Maternal	Han	M
HK0032839AN	Amnion	Han	F
HK0032839BCN	Chorion	Han	F
HK0032839CN	Chorionic Plate	Han	F
HK0032839UC	Umbilical Cord	Han	F
HK0032839VF	Villus of Fetal	Han	F
HK0032839VI	Villus of Intermediate	Han	F
HK0032839VM	Villus of Maternal	Han	F
HK0033417AN	Amnion	Han	M
HK0033417BCN	Chorion	Han	M
HK0033417CN	Chorionic Plate	Han	M
HK0033417UC	Umbilical Cord	Han	M
HK0033417VF	Villus of Fetal	Han	M
HK0033417VI	Villus of Intermediate	Han	M
HK0033417VM	Villus of Maternal	Han	M
HK0033518AN	Amnion	Han	F
HK0033518BCN	Chorion	Han	F
HK0033518CN	Chorionic Plate	Han	F
HK0033518UC	Umbilical Cord	Han	F
HK0033518VF	Villus of Fetal	Han	F
HK0033518VI	Villus of Intermediate	Han	F
HK0033518VM	Villus of Maternal	Han	F
HK0033558AN	Amnion	Han	M
HK0033558BCN	Chorion	Han	M
HK0033558CN	Chorionic Plate	Han	M
HK0033558UC	Umbilical Cord	Han	M
HK0033558VF	Villus of Fetal	Han	M
HK0033558VI	Villus of Intermediate	Han	M
HK0033558VM	Villus of Maternal	Han	M
HK0033575AN	Amnion	Han	F
HK0033575BCN	Chorion	Han	F
HK0033575CN	Chorionic Plate	Han	F
HK0033575VF	Villus of Fetal	Han	F
HK0033575VI	Villus of Intermediate	Han	F
HK0033575VM	Villus of Maternal	Han	F
HK0033622AN	Amnion	Han	F
HK0033622BCN	Chorion	Han	F
HK0033622CN	Chorionic Plate	Han	F
HK0033622UC	Umbilical Cord	Han	F
HK0033622VF	Villus of Fetal	Han	F
HK0033622VI	Villus of Intermediate	Han	F
HK0033622VM	Villus of Maternal	Han	F
HK0034023AN	Amnion	Han	F
HK0034023BCN	Chorion	Han	F
HK0034023CN	Chorionic Plate	Han	F
HK0034023UC	Umbilical Cord	Han	F
HK0034023VF	Villus of Fetal	Han	F
HK0034023VI	Villus of Intermediate	Han	F
HK0034023VM	Villus of Maternal	Han	F
HK0034268AN	Amnion	Han	M
HK0034268BCN	Chorion	Han	M
HK0034268CN	Chorionic Plate	Han	M
HK0034268UC	Umbilical Cord	Han	M
HK0034268VF	Villus of Fetal	Han	M
HK0034268VI	Villus of Intermediate	Han	M
HK0034268VM	Villus of Maternal	Han	M
HK0034395AN	Amnion	Han	M
HK0034395BCN	Chorion	Han	M
HK0034395CN	Chorionic Plate	Han	M
HK0034395UC	Umbilical Cord	Han	M
HK0034395VF	Villus of Fetal	Han	M
HK0034395VI	Villus of Intermediate	Han	M
HK0034395VM	Villus of Maternal	Han	M
HK0034425AN	Amnion	Han	M
HK0034425BCN	Chorion	Han	M
HK0034425CN	Chorionic Plate	Han	M
HK0034425UC	Umbilical Cord	Han	M
HK0034425VF	Villus of Fetal	Han	M
HK0034425VI	Villus of Intermediate	Han	M
HK0034425VM	Villus of Maternal	Han	M
HK0034431AN	Amnion	Han	F
HK0034431BCN	Chorion	Han	F
HK0034431CN	Chorionic Plate	Han	F
HK0034431UC	Umbilical Cord	Han	F
HK0034431VF	Villus of Fetal	Han	F
HK0034431VI	Villus of Intermediate	Han	F
HK0034431VM	Villus of Maternal	Han	F
HK0034640AN	Amnion	Han	F
HK0034640BCN	Chorion	Han	F
HK0034640CN	Chorionic Plate	Han	F
HK0034640UC	Umbilical Cord	Han	F
HK0034640VF	Villus of Fetal	Han	F
HK0034640VI	Villus of Intermediate	Han	F
HK0034640VM	Villus of Maternal	Han	F
HK0034896AN	Amnion	Han	M
HK0034896BCN	Chorion	Han	M
HK0034896CN	Chorionic Plate	Han	M
HK0034896UC	Umbilical Cord	Han	M
HK0034896VF	Villus of Fetal	Han	M
HK0034896VI	Villus of Intermediate	Han	M
HK0034896VM	Villus of Maternal	Han	M
HK0034916AN	Amnion	Han	F
HK0034916CN	Chorionic Plate	Han	F
HK0034916UC	Umbilical Cord	Han	F
HK0034916VF	Villus of Fetal	Han	F
HK0034916VI	Villus of Intermediate	Han	F
HK0034916VM	Villus of Maternal	Han	F
HK0034921AN	Amnion	Han	F
HK0034921BCN	Chorion	Han	F
HK0034921CN	Chorionic Plate	Han	F
HK0034921UC	Umbilical Cord	Han	F
HK0034921VF	Villus of Fetal	Han	F
HK0034921VI	Villus of Intermediate	Han	F
HK0034921VM	Villus of Maternal	Han	F
HK0034926AN	Amnion	Han	M
HK0034926BCN	Chorion	Han	M
HK0034926CN	Chorionic Plate	Han	M
HK0034926UC	Umbilical Cord	Han	M
HK0034926VF	Villus of Fetal	Han	M
HK0034926VI	Villus of Intermediate	Han	M
HK0034926VM	Villus of Maternal	Han	M
HK0035692AN	Amnion	Han	M
HK0035692BCN	Chorion	Han	M
HK0035692CN	Chorionic Plate	Han	M
HK0035692VF	Villus of Fetal	Han	M
HK0035692VI	Villus of Intermediate	Han	M
HK0035692VM	Villus of Maternal	Han	M
HK0035971AN	Amnion	Han	F
HK0035971BCN	Chorion	Han	F
HK0035971CN	Chorionic Plate	Han	F
HK0035971UC	Umbilical Cord	Han	F
HK0035971VF	Villus of Fetal	Han	F
HK0035971VI	Villus of Intermediate	Han	F
HK0035971VM	Villus of Maternal	Han	F
HK0036075AN	Amnion	Han	F
HK0036075BCN	Chorion	Han	F
HK0036075CN	Chorionic Plate	Han	F
HK0036075UC	Umbilical Cord	Han	F
HK0036075VF	Villus of Fetal	Han	F
HK0036075VI	Villus of Intermediate	Han	F
HK0036075VM	Villus of Maternal	Han	F
HK0036112AN	Amnion	Han	M
HK0036112BCN	Chorion	Han	M
HK0036112CN	Chorionic Plate	Han	M
HK0036112UC	Umbilical Cord	Han	M
HK0036112VF	Villus of Fetal	Han	M
HK0036112VI	Villus of Intermediate	Han	M
HK0036112VM	Villus of Maternal	Han	M
HK0036250AN	Amnion	Han	M
HK0036250BCN	Chorion	Han	M
HK0036250CN	Chorionic Plate	Han	M
HK0036250UC	Umbilical Cord	Han	M
HK0036250VF	Villus of Fetal	Han	M
HK0036250VI	Villus of Intermediate	Han	M
HK0036250VM	Villus of Maternal	Han	M
HK0036297AN	Amnion	Han	M
HK0036297BCN	Chorion	Han	M
HK0036297CN	Chorionic Plate	Han	M
HK0036297UC	Umbilical Cord	Han	M
HK0036297VF	Villus of Fetal	Han	M
HK0036297VI	Villus of Intermediate	Han	M
HK0036297VM	Villus of Maternal	Han	M
HK0036876AN	Amnion	Han	F
HK0036876BCN	Chorion	Han	F
HK0036876CN	Chorionic Plate	Han	F
HK0036876VF	Villus of Fetal	Han	F
HK0036876VI	Villus of Intermediate	Han	F
HK0036876VM	Villus of Maternal	Han	F
HK0036922AN	Amnion	Han	M
HK0036922BCN	Chorion	Han	M
HK0036922CN	Chorionic Plate	Han	M
HK0036922UC	Umbilical Cord	Han	M
HK0036922VF	Villus of Fetal	Han	M
HK0036922VI	Villus of Intermediate	Han	M
HK0036922VM	Villus of Maternal	Han	M
HK0037408AN	Amnion	Han	M
HK0037408BCN	Chorion	Han	M
HK0037408CN	Chorionic Plate	Han	M
HK0037408UC	Umbilical Cord	Han	M
HK0037408VF	Villus of Fetal	Han	M
HK0037408VI	Villus of Intermediate	Han	M
HK0037408VM	Villus of Maternal	Han	M
HK0037935AN	Amnion	Han	M
HK0037935BCN	Chorion	Han	M
HK0037935CN	Chorionic Plate	Han	M
HK0037935UC	Umbilical Cord	Han	M
HK0037935VF	Villus of Fetal	Han	M
HK0037935VI	Villus of Intermediate	Han	M
HK0037935VM	Villus of Maternal	Han	M
K0031857AN	Amnion	Tibetan	F
K0031857BCN	Chorion	Tibetan	F
K0031857CN	Chorionic Plate	Tibetan	F
K0031857UC	Umbilical Cord	Tibetan	F
K0031857VF	Villus of Fetal	Tibetan	F
K0031857VI	Villus of Intermediate	Tibetan	F
K0031857VM	Villus of Maternal	Tibetan	F
K0031954AN	Amnion	Tibetan	F
K0031954BCN	Chorion	Tibetan	F
K0031954CN	Chorionic Plate	Tibetan	F
K0031954UC	Umbilical Cord	Tibetan	F
K0031954VF	Villus of Fetal	Tibetan	F
K0031954VI	Villus of Intermediate	Tibetan	F
K0031954VM	Villus of Maternal	Tibetan	F
K0031955AN	Amnion	Tibetan	F
K0031955BCN	Chorion	Tibetan	F
K0031955CN	Chorionic Plate	Tibetan	F
K0031955UC	Umbilical Cord	Tibetan	F
K0031955VF	Villus of Fetal	Tibetan	F
K0031955VI	Villus of Intermediate	Tibetan	F
K0031955VM	Villus of Maternal	Tibetan	F
K0031964AN	Amnion	Tibetan	M
K0031964BCN	Chorion	Tibetan	M
K0031964CN	Chorionic Plate	Tibetan	M
K0031964UC	Umbilical Cord	Tibetan	M
K0031964VF	Villus of Fetal	Tibetan	M
K0031964VI	Villus of Intermediate	Tibetan	M
K0031964VM	Villus of Maternal	Tibetan	M
K0031965AN	Amnion	Tibetan	M
K0031965BCN	Chorion	Tibetan	M
K0031965CN	Chorionic Plate	Tibetan	M
K0031965UC	Umbilical Cord	Tibetan	M
K0031965VF	Villus of Fetal	Tibetan	M
K0031965VI	Villus of Intermediate	Tibetan	M
K0031965VM	Villus of Maternal	Tibetan	M
K0033586AN	Amnion	Tibetan	M
K0033586BCN	Chorion	Tibetan	M
K0033586CN	Chorionic Plate	Tibetan	M
K0033586UC	Umbilical Cord	Tibetan	M
K0033586VF	Villus of Fetal	Tibetan	M
K0033586VI	Villus of Intermediate	Tibetan	M
K0033586VM	Villus of Maternal	Tibetan	M
K0033644AN	Amnion	Tibetan	M
K0033644BCN	Chorion	Tibetan	M
K0033644CN	Chorionic Plate	Tibetan	M
K0033644UC	Umbilical Cord	Tibetan	M
K0033644VF	Villus of Fetal	Tibetan	M
K0033644VI	Villus of Intermediate	Tibetan	M
K0033644VM	Villus of Maternal	Tibetan	M
K0033676AN	Amnion	Tibetan	M
K0033676BCN	Chorion	Tibetan	M
K0033676CN	Chorionic Plate	Tibetan	M
K0033676UC	Umbilical Cord	Tibetan	M
K0033676VF	Villus of Fetal	Tibetan	M
K0033676VI	Villus of Intermediate	Tibetan	M
K0033676VM	Villus of Maternal	Tibetan	M
K0033720AN	Amnion	Tibetan	M
K0033720BCN	Chorion	Tibetan	M
K0033720CN	Chorionic Plate	Tibetan	M
K0033720UC	Umbilical Cord	Tibetan	M
K0033720VF	Villus of Fetal	Tibetan	M
K0033720VI	Villus of Intermediate	Tibetan	M
K0033720VM	Villus of Maternal	Tibetan	M
K0034663AN	Amnion	Tibetan	F
K0034663BCN	Chorion	Tibetan	F
K0034663CN	Chorionic Plate	Tibetan	F
K0034663UC	Umbilical Cord	Tibetan	F
K0034663VF	Villus of Fetal	Tibetan	F
K0034663VI	Villus of Intermediate	Tibetan	F
K0034663VM	Villus of Maternal	Tibetan	F
K0034975AN	Amnion	Tibetan	F
K0034975BCN	Chorion	Tibetan	F
K0034975CN	Chorionic Plate	Tibetan	F
K0034975UC	Umbilical Cord	Tibetan	F
K0034975VF	Villus of Fetal	Tibetan	F
K0034975VI	Villus of Intermediate	Tibetan	F
K0034975VM	Villus of Maternal	Tibetan	F
K0034979AN	Amnion	Tibetan	F
K0034979BCN	Chorion	Tibetan	F
K0034979CN	Chorionic Plate	Tibetan	F
K0034979UC	Umbilical Cord	Tibetan	F
K0034979VF	Villus of Fetal	Tibetan	F
K0034979VI	Villus of Intermediate	Tibetan	F
K0034979VM	Villus of Maternal	Tibetan	F
K0035001AN	Amnion	Tibetan	F
K0035001BCN	Chorion	Tibetan	F
K0035001CN	Chorionic Plate	Tibetan	F
K0035001UC	Umbilical Cord	Tibetan	F
K0035001VF	Villus of Fetal	Tibetan	F
K0035001VI	Villus of Intermediate	Tibetan	F
K0035001VM	Villus of Maternal	Tibetan	F
K0035003AN	Amnion	Tibetan	F
K0035003BCN	Chorion	Tibetan	F
K0035003CN	Chorionic Plate	Tibetan	F
K0035003UC	Umbilical Cord	Tibetan	F
K0035003VF	Villus of Fetal	Tibetan	F
K0035003VI	Villus of Intermediate	Tibetan	F
K0035003VM	Villus of Maternal	Tibetan	F
K0035006AN	Amnion	Tibetan	M
K0035006BCN	Chorion	Tibetan	M
K0035006CN	Chorionic Plate	Tibetan	M
K0035006UC	Umbilical Cord	Tibetan	M
K0035006VF	Villus of Fetal	Tibetan	M
K0035006VI	Villus of Intermediate	Tibetan	M
K0035006VM	Villus of Maternal	Tibetan	M
K0035015AN	Amnion	Tibetan	F
K0035015BCN	Chorion	Tibetan	F
K0035015CN	Chorionic Plate	Tibetan	F
K0035015UC	Umbilical Cord	Tibetan	F
K0035015VF	Villus of Fetal	Tibetan	F
K0035015VI	Villus of Intermediate	Tibetan	F
K0035015VM	Villus of Maternal	Tibetan	F
K0035567AN	Amnion	Tibetan	F
K0035567BCN	Chorion	Tibetan	F
K0035567CN	Chorionic Plate	Tibetan	F
K0035567UC	Umbilical Cord	Tibetan	F
K0035567VF	Villus of Fetal	Tibetan	F
K0035567VI	Villus of Intermediate	Tibetan	F
K0035567VM	Villus of Maternal	Tibetan	F
K0035729AN	Amnion	Tibetan	F
K0035729BCN	Chorion	Tibetan	F
K0035729CN	Chorionic Plate	Tibetan	F
K0035729UC	Umbilical Cord	Tibetan	F
K0035729VF	Villus of Fetal	Tibetan	F
K0035729VI	Villus of Intermediate	Tibetan	F
K0035729VM	Villus of Maternal	Tibetan	F
K0036067AN	Amnion	Tibetan	M
K0036067BCN	Chorion	Tibetan	M
K0036067CN	Chorionic Plate	Tibetan	M
K0036067UC	Umbilical Cord	Tibetan	M
K0036067VF	Villus of Fetal	Tibetan	M
K0036067VI	Villus of Intermediate	Tibetan	M
K0036067VM	Villus of Maternal	Tibetan	M
K0036081AN	Amnion	Tibetan	M
K0036081BCN	Chorion	Tibetan	M
K0036081CN	Chorionic Plate	Tibetan	M
K0036081UC	Umbilical Cord	Tibetan	M
K0036081VF	Villus of Fetal	Tibetan	M
K0036081VI	Villus of Intermediate	Tibetan	M
K0036081VM	Villus of Maternal	Tibetan	M
K0036099AN	Amnion	Tibetan	M
K0036099BCN	Chorion	Tibetan	M
K0036099CN	Chorionic Plate	Tibetan	M
K0036099UC	Umbilical Cord	Tibetan	M
K0036099VF	Villus of Fetal	Tibetan	M
K0036099VI	Villus of Intermediate	Tibetan	M
K0036099VM	Villus of Maternal	Tibetan	M
K0036133AN	Amnion	Tibetan	F
K0036133BCN	Chorion	Tibetan	F
K0036133CN	Chorionic Plate	Tibetan	F
K0036133UC	Umbilical Cord	Tibetan	F
K0036133VF	Villus of Fetal	Tibetan	F
K0036133VI	Villus of Intermediate	Tibetan	F
K0036133VM	Villus of Maternal	Tibetan	F
K0036158AN	Amnion	Tibetan	F
K0036158BCN	Chorion	Tibetan	F
K0036158CN	Chorionic Plate	Tibetan	F
K0036158UC	Umbilical Cord	Tibetan	F
K0036158VF	Villus of Fetal	Tibetan	F
K0036158VI	Villus of Intermediate	Tibetan	F
K0036158VM	Villus of Maternal	Tibetan	F
K0036160AN	Amnion	Tibetan	M
K0036160BCN	Chorion	Tibetan	M
K0036160CN	Chorionic Plate	Tibetan	M
K0036160UC	Umbilical Cord	Tibetan	M
K0036160VF	Villus of Fetal	Tibetan	M
K0036160VI	Villus of Intermediate	Tibetan	M
K0036160VM	Villus of Maternal	Tibetan	M
K0036226AN	Amnion	Tibetan	M
K0036226BCN	Chorion	Tibetan	M
K0036226CN	Chorionic Plate	Tibetan	M
K0036226UC	Umbilical Cord	Tibetan	M
K0036226VF	Villus of Fetal	Tibetan	M
K0036226VI	Villus of Intermediate	Tibetan	M
K0036226VM	Villus of Maternal	Tibetan	M
K0036241AN	Amnion	Tibetan	M
K0036241BCN	Chorion	Tibetan	M
K0036241CN	Chorionic Plate	Tibetan	M
K0036241UC	Umbilical Cord	Tibetan	M
K0036241VF	Villus of Fetal	Tibetan	M
K0036241VI	Villus of Intermediate	Tibetan	M
K0036241VM	Villus of Maternal	Tibetan	M
K0036243AN	Amnion	Tibetan	M
K0036243BCN	Chorion	Tibetan	M
K0036243CN	Chorionic Plate	Tibetan	M
K0036243UC	Umbilical Cord	Tibetan	M
K0036243VF	Villus of Fetal	Tibetan	M
K0036243VI	Villus of Intermediate	Tibetan	M
K0036243VM	Villus of Maternal	Tibetan	M
K0036255AN	Amnion	Tibetan	F
K0036255BCN	Chorion	Tibetan	F
K0036255CN	Chorionic Plate	Tibetan	F
K0036255UC	Umbilical Cord	Tibetan	F
K0036255VF	Villus of Fetal	Tibetan	F
K0036255VI	Villus of Intermediate	Tibetan	F
K0036255VM	Villus of Maternal	Tibetan	F
K0036273AN	Amnion	Tibetan	F
K0036273BCN	Chorion	Tibetan	F
K0036273CN	Chorionic Plate	Tibetan	F
K0036273UC	Umbilical Cord	Tibetan	F
K0036273VF	Villus of Fetal	Tibetan	F
K0036273VI	Villus of Intermediate	Tibetan	F
K0036273VM	Villus of Maternal	Tibetan	F
K0036281AN	Amnion	Tibetan	F
K0036281BCN	Chorion	Tibetan	F
K0036281CN	Chorionic Plate	Tibetan	F
K0036281UC	Umbilical Cord	Tibetan	F
K0036281VF	Villus of Fetal	Tibetan	F
K0036281VI	Villus of Intermediate	Tibetan	F
K0036281VM	Villus of Maternal	Tibetan	F
K0036296AN	Amnion	Tibetan	F
K0036296BCN	Chorion	Tibetan	F
K0036296CN	Chorionic Plate	Tibetan	F
K0036296UC	Umbilical Cord	Tibetan	F
K0036296VF	Villus of Fetal	Tibetan	F
K0036296VI	Villus of Intermediate	Tibetan	F
K0036296VM	Villus of Maternal	Tibetan	F
K0036456AN	Amnion	Tibetan	M
K0036456BCN	Chorion	Tibetan	M
K0036456CN	Chorionic Plate	Tibetan	M
K0036456UC	Umbilical Cord	Tibetan	M
K0036456VF	Villus of Fetal	Tibetan	M
K0036456VI	Villus of Intermediate	Tibetan	M
K0036456VM	Villus of Maternal	Tibetan	M
K0036495AN	Amnion	Tibetan	M
K0036495BCN	Chorion	Tibetan	M
K0036495CN	Chorionic Plate	Tibetan	M
K0036495UC	Umbilical Cord	Tibetan	M
K0036495VF	Villus of Fetal	Tibetan	M
K0036495VI	Villus of Intermediate	Tibetan	M
K0036495VM	Villus of Maternal	Tibetan	M
K0037997AN	Amnion	Tibetan	F
K0037997BCN	Chorion	Tibetan	F
K0037997CN	Chorionic Plate	Tibetan	F
K0037997UC	Umbilical Cord	Tibetan	F
K0037997VF	Villus of Fetal	Tibetan	F
K0037997VI	Villus of Intermediate	Tibetan	F
K0037997VM	Villus of Maternal	Tibetan	F
K0038033AN	Amnion	Tibetan	F
K0038033BCN	Chorion	Tibetan	F
K0038033CN	Chorionic Plate	Tibetan	F
K0038033UC	Umbilical Cord	Tibetan	F
K0038033VF	Villus of Fetal	Tibetan	F
K0038033VI	Villus of Intermediate	Tibetan	F
K0038033VM	Villus of Maternal	Tibetan	F
	K0031857AN	K0031857BCN	K0031857CN	K0031857UC	K0031857VF	K0031857VI	K0031857VM	K0031954AN	K0031954BCN	K0031954CN	K0031954UC	K0031954VF	K0031954VI	K0031954VM	K0031955AN	K0031955BCN	K0031955CN	K0031955UC	K0031955VF	K0031955VI	K0031955VM	K0031964AN	K0031964BCN	K0031964CN	K0031964UC	K0031964VF	K0031964VI	K0031964VM	K0031965AN	K0031965BCN	K0031965CN	K0031965UC	K0031965VF	K0031965VI	K0031965VM	K0033586AN	K0033586BCN	K0033586CN	K0033586UC	K0033586VF	K0033586VI	K0033586VM	K0033644AN	K0033644BCN	K0033644CN	K0033644UC	K0033644VF	K0033644VI	K0033644VM
K0031857AN	1	0.860781994294978	0.867451478761323	0.784293653983963	0.84888441945693	0.856150387305254	0.84500427299625	0.844027068060944	0.844860453137468	0.850136142606993	0.730301785917277	0.835010459015845	0.840449114194661	0.839420052612432	0.886372541571128	0.836542406934768	0.844809732407455	0.749677700328021	0.825152842033576	0.833719639454054	0.835497553866965	0.853146609628196	0.847601519519645	0.836939420488684	0.760814743110925	0.827653977764056	0.83190592784425	0.829540837354127	0.8582120243515	0.851029670034598	0.851699885068253	0.750276189058736	0.848733298646687	0.854181689887652	0.848259916337872	0.842043644748531	0.854406939041735	0.864177709035081	0.72118571250315	0.819035339472719	0.825783058945925	0.824291863858785	0.804701376561986	0.840545345170563	0.834932125681967	0.743626054792045	0.82223326791428	0.829600951334335	0.829824917646916
K0031857BCN	0.860781994294978	1	0.849680527178088	0.741372220735282	0.835002535525995	0.839340617062983	0.842610626041012	0.798739899066823	0.880811223186262	0.823593966583276	0.699223399042656	0.81685878893749	0.817898884343283	0.824452771149458	0.867725419174534	0.889747094475204	0.83990379774244	0.710859647338489	0.813500433693075	0.823618547513537	0.833818428009253	0.822206551958178	0.879590132857194	0.827258361534681	0.715040944953765	0.822202280739967	0.820872640543448	0.832879471420493	0.818511758234211	0.882387319567166	0.854157935516961	0.69946812719479	0.842666630331029	0.837886745290761	0.838084185380857	0.812090749666181	0.859966497106302	0.862661543273111	0.676432044615461	0.794082261950938	0.804948250495141	0.806184722061297	0.743457021686653	0.880937073417679	0.816906562871673	0.704375564447148	0.813184233774607	0.826081768326961	0.815444857632427
K0031857CN	0.867451478761323	0.849680527178088	1	0.742734157276411	0.916430690423473	0.913291481278297	0.906750197852564	0.836556346225174	0.829810043271775	0.872976438158164	0.668853125040313	0.888669150850784	0.889396615055154	0.889612718341338	0.887350618640105	0.838682639499499	0.894879787623631	0.712854441278892	0.893726224966602	0.900834456703778	0.898808359970621	0.820268188208437	0.851669630560828	0.885933172360719	0.704873638577215	0.885282945120764	0.895348910924879	0.892002052244493	0.853970302008702	0.819922716118529	0.877071368751737	0.692666822320242	0.890443206181872	0.901529053531698	0.907232944088403	0.845742487406399	0.84343675598754	0.86694249487788	0.660517626390929	0.885486680552553	0.891647177377346	0.89164981582197	0.801159808930834	0.824274101819505	0.879658362023618	0.691723318454021	0.886124275985318	0.882086477154779	0.885063697399556
K0031857UC	0.784293653983963	0.741372220735282	0.742734157276411	1	0.72158623842423	0.742432885956751	0.716114256603142	0.770619778268622	0.743021523451683	0.80273596524671	0.895895525163649	0.737729039484885	0.738342135607706	0.704303538402367	0.765730785267631	0.680075139492699	0.738485845574516	0.909464813280773	0.695105574690309	0.697487294962912	0.694091894554462	0.789233882222381	0.716996102962075	0.74067172624086	0.8868635649829	0.732781530303418	0.734998296468002	0.728803116293333	0.781261108239846	0.749781041138864	0.776216167957755	0.899649065934176	0.790714806443795	0.747300260870291	0.746230311958566	0.777147357866321	0.746237415198696	0.736442767716737	0.889555296433319	0.716058373372824	0.721721378671827	0.721340829002827	0.768278109627956	0.712573099906047	0.749011823011102	0.902857270183164	0.689210086353346	0.69956612118786	0.723836377238941
K0031857VF	0.84888441945693	0.835002535525995	0.916430690423473	0.72158623842423	1	0.923263576944244	0.914257403127528	0.825239308537029	0.818463662748123	0.865617165384569	0.650230256442939	0.888157942584046	0.891789684288443	0.894335574902267	0.870347764303351	0.823259460819186	0.891122335714851	0.691166394603865	0.892991592477643	0.896443044842814	0.90067218107757	0.799912146150293	0.836674282256844	0.893215882625445	0.685413726440407	0.886086514924591	0.894119884760798	0.890710771962758	0.83018148128765	0.796079096451131	0.857603992863378	0.672322868003696	0.886812380304849	0.897696418574661	0.905988550633907	0.83452256535299	0.823498906342877	0.858640550294446	0.640875593179009	0.893760152094709	0.890265683587178	0.897764090208455	0.794889511910358	0.806716785608825	0.86920647082193	0.67054686725338	0.88937940464418	0.881667780903297	0.886551177271215
K0031857VI	0.856150387305254	0.839340617062983	0.913291481278297	0.742432885956751	0.923263576944244	1	0.914291691751877	0.834136471521149	0.821912435733118	0.865452075724253	0.668017597005731	0.888632878726073	0.891918817534057	0.885269774562978	0.87413073989484	0.827109574887494	0.88566890902244	0.715454270416195	0.890127790514518	0.896469838699683	0.893753019947277	0.815844737184131	0.841446058152029	0.88679597127512	0.70426603737382	0.894181282525429	0.895751241617601	0.901269012340247	0.84909089646595	0.806217069085101	0.865616565180447	0.690503137752579	0.889463584218676	0.903691156298369	0.910298157960113	0.843596172505433	0.833312968396381	0.864050940171961	0.653897766045474	0.893029056068368	0.890911677043851	0.893155661486706	0.814108375674821	0.812979130226089	0.87645086436015	0.697085714170317	0.888045744644581	0.883402412377388	0.894392091096995
K0031857VM	0.84500427299625	0.842610626041012	0.906750197852564	0.716114256603142	0.914257403127528	0.914291691751877	1	0.81720833274561	0.813126549026659	0.850421725293991	0.638826728092437	0.877644799488973	0.873237667649215	0.882054998319921	0.864721495447845	0.823363480737815	0.882182016798333	0.682715374907196	0.87715017363919	0.892242463878585	0.896615516231539	0.798704681980365	0.832546987211856	0.881450835707422	0.675966403668647	0.885290197684855	0.886478842547947	0.888208464773096	0.826077638761302	0.8007275967622	0.858439628334433	0.65802326155754	0.875731403943275	0.895260836269403	0.901601285840578	0.825637286629734	0.824239888942044	0.857543346275841	0.630950037426717	0.881217521196421	0.887397209819897	0.887113385009657	0.785824638216005	0.804334494329252	0.865958250767781	0.663418392724634	0.888114159890896	0.877835180373006	0.878604854121382
K0031954AN	0.844027068060944	0.798739899066823	0.836556346225174	0.770619778268622	0.825239308537029	0.834136471521149	0.81720833274561	1	0.804817538747985	0.83526593548039	0.738794203276292	0.848204172968744	0.840913442132952	0.824092868608743	0.864814166585795	0.75955938695711	0.822617347400152	0.758385310206438	0.805153360186062	0.806763355627587	0.808433635898298	0.852551902451935	0.798344608408297	0.821111466915319	0.75309194825344	0.824165865564394	0.825072332843495	0.818605800802784	0.890111828893887	0.7690800043703	0.815276771206902	0.74668615964631	0.832625103324506	0.831004158450545	0.833733516318134	0.877624807616122	0.791023112564235	0.813038017404139	0.718947425912771	0.813329143687683	0.822451027540443	0.829121038107151	0.86236338901191	0.778485650850031	0.813840458612856	0.757329245031604	0.807099900277928	0.804590400938399	0.83066046097121
K0031954BCN	0.844860453137468	0.880811223186262	0.829810043271775	0.743021523451683	0.818463662748123	0.821912435733118	0.813126549026659	0.804817538747985	1	0.833033136988884	0.723117323162409	0.824339011138605	0.824629064401121	0.826159240619209	0.862618364832197	0.865605177869404	0.827289176063752	0.723970014897228	0.801697595680914	0.813961843009662	0.814493087109058	0.809480526352447	0.867360997637402	0.817088609368825	0.738259915703863	0.806450804891959	0.809907682050997	0.820194879718298	0.808807881708688	0.87216637715157	0.847247959671818	0.721007260982304	0.833352701574684	0.828701861574029	0.814624591696781	0.801887775171306	0.855577448206608	0.844775216861645	0.700822051413734	0.786398442471813	0.793159613165958	0.799862386696039	0.738066501819028	0.867077225795271	0.810557705138977	0.711900140347564	0.809647613140676	0.808365655288265	0.793253313126326
K0031954CN	0.850136142606993	0.823593966583276	0.872976438158164	0.80273596524671	0.865617165384569	0.865452075724253	0.850421725293991	0.83526593548039	0.833033136988884	1	0.766962018269276	0.871752754735082	0.879352300082572	0.863020940278682	0.857093353576922	0.79596875930787	0.872019273669589	0.79351139848127	0.845405403843753	0.85370815287888	0.853986962513652	0.830012079359631	0.82850225929097	0.868353693502717	0.784874614893414	0.864546569579205	0.863870985055223	0.85701920316547	0.838786947140909	0.822737431265305	0.865439154647227	0.784311187623375	0.886214988264125	0.87947106129284	0.874850511418525	0.837958467146545	0.839107227520388	0.849588177697176	0.762707971519191	0.856130834083969	0.854490126518648	0.858877588382872	0.812454498919241	0.802352095458327	0.85684943326135	0.766978773797917	0.845428003545502	0.849892854778921	0.857204195683879
K0031954UC	0.730301785917277	0.699223399042656	0.668853125040313	0.895895525163649	0.650230256442939	0.668017597005731	0.638826728092437	0.738794203276292	0.723117323162409	0.766962018269276	1	0.688122062440617	0.689534098483255	0.654232873287225	0.715433632179933	0.632269653133856	0.68287998067534	0.91252733907022	0.627610171486987	0.630024113255183	0.623854347709332	0.745958080136565	0.677929962725516	0.687368489964058	0.902079010333713	0.676242916261295	0.67924977439553	0.664086745713566	0.735860076202267	0.724602691427382	0.723694233654146	0.912838883619862	0.739161551310754	0.688252655153799	0.684907657304785	0.740228520248981	0.706173125872603	0.68424124935487	0.895032662408052	0.658682048180648	0.661894250537684	0.658810501146213	0.72475326456526	0.673309295637019	0.69049716445479	0.891799947357623	0.629193235322528	0.63293325341588	0.657408392975618
K0031954VF	0.835010459015845	0.81685878893749	0.888669150850784	0.737729039484885	0.888157942584046	0.888632878726073	0.877644799488973	0.848204172968744	0.824339011138605	0.871752754735082	0.688122062440617	1	0.892143064449138	0.88283394901875	0.860466252669139	0.800347451905486	0.879400717398977	0.726036777663778	0.878754271186776	0.877230673732858	0.877227520028549	0.802840961743801	0.821111684337962	0.86811620876844	0.712525535245508	0.874909947490326	0.875606467967711	0.873291581474124	0.841044221045051	0.787093530478633	0.858404042900006	0.710843671355053	0.874025986932477	0.884792765231107	0.879552227517798	0.842280317508311	0.816724811797207	0.844995624946185	0.677312305355197	0.885947602132755	0.877260908414387	0.884224090617271	0.806931305117119	0.798500003160923	0.860660963513894	0.705434227554905	0.8780253858009	0.869658446480516	0.870849043675209
K0031954VI	0.840449114194661	0.817898884343283	0.889396615055154	0.738342135607706	0.891789684288443	0.891918817534057	0.873237667649215	0.840913442132952	0.824629064401121	0.879352300082572	0.689534098483255	0.892143064449138	1	0.890273927946276	0.862072647369663	0.812145426424752	0.885441104593192	0.724062706272027	0.879178975248924	0.879242894569894	0.880939352019306	0.797512641442318	0.835615966797515	0.869445903537871	0.724651093391848	0.873926831189808	0.877231633578761	0.869837802184505	0.839263568526774	0.790251537537724	0.860429032030439	0.71061414868294	0.881240151445583	0.890877248142829	0.887115768662804	0.836581998262583	0.828503551813433	0.849419673150419	0.680841367362758	0.878750736765378	0.882448638695496	0.877718627272061	0.802156833404825	0.797451863361434	0.868722586903842	0.703435685237918	0.878577922911504	0.868029159009214	0.870713132355614
K0031954VM	0.839420052612432	0.824452771149458	0.889612718341338	0.704303538402367	0.894335574902267	0.885269774562978	0.882054998319921	0.824092868608743	0.826159240619209	0.863020940278682	0.654232873287225	0.88283394901875	0.890273927946276	1	0.860268022309328	0.829019626091135	0.882616135704938	0.685389651475911	0.874192443611089	0.887273541142992	0.889584216650338	0.787621165250407	0.836278627585999	0.874266090199002	0.690627537009304	0.86583366909033	0.869532350308928	0.868264580953203	0.822476510293486	0.801639555142955	0.857775095096234	0.676386057483713	0.869539830866336	0.880938115541964	0.877799247788613	0.816978325362566	0.827188417766008	0.857158723468487	0.638660515865835	0.870028891081712	0.873908857577604	0.879918040027662	0.77117386324299	0.806363225001123	0.856130924829153	0.667188328045568	0.869138555190662	0.869975341640378	0.866035627392006
K0031955AN	0.886372541571128	0.867725419174534	0.887350618640105	0.765730785267631	0.870347764303351	0.87413073989484	0.864721495447845	0.864814166585795	0.862618364832197	0.857093353576922	0.715433632179933	0.860466252669139	0.862072647369663	0.860268022309328	1	0.856704254350166	0.873623361440223	0.741365263232234	0.860445801517446	0.856683683626691	0.861411257560383	0.852543999183147	0.864531382743363	0.859496367484947	0.740973292218446	0.855224822822914	0.856334927257674	0.856228868099839	0.877426456892705	0.845871158436068	0.867724645516822	0.735445362647614	0.871905067490777	0.865830152615171	0.870717430366643	0.865567382435212	0.857643675810928	0.867640908582655	0.704377140365937	0.844848631832085	0.858169617998055	0.862957240390731	0.818580733365561	0.843817011400631	0.846196511920577	0.728582077479518	0.849966061150837	0.852425645680813	0.851575742769154
K0031955BCN	0.836542406934768	0.889747094475204	0.838682639499499	0.680075139492699	0.823259460819186	0.827109574887494	0.823363480737815	0.75955938695711	0.865605177869404	0.79596875930787	0.632269653133856	0.800347451905486	0.812145426424752	0.829019626091135	0.856704254350166	1	0.837567172304655	0.649295186555094	0.811482550481501	0.829685869253034	0.837813562649327	0.773899667591809	0.876543692643099	0.816894856543263	0.660901143146647	0.799068309763578	0.797979137304281	0.812791288078324	0.783394618174989	0.866774933634042	0.842549442313229	0.642631093046724	0.827584267484195	0.820406957556226	0.820824060537868	0.765095158686324	0.85182667521534	0.861476724326057	0.623762903567414	0.781147326545872	0.78981429099183	0.796228174470812	0.691433242425088	0.866665301339374	0.804173077392333	0.638917930189443	0.811412771206192	0.817165230728929	0.794925775107723
K0031955CN	0.844809732407455	0.83990379774244	0.894879787623631	0.738485845574516	0.891122335714851	0.88566890902244	0.882182016798333	0.822617347400152	0.827289176063752	0.872019273669589	0.68287998067534	0.879400717398977	0.885441104593192	0.882616135704938	0.873623361440223	0.837567172304655	1	0.721977838260241	0.891400392721523	0.901067204556353	0.89415714838452	0.804547810472642	0.83914362238106	0.878832577716623	0.713293047409571	0.864296420440503	0.872274793191556	0.870473784093404	0.832040854985408	0.8122960701772	0.881216617287547	0.71094931715163	0.88385425055391	0.881934390527295	0.888301710360502	0.826697635274872	0.835957821741217	0.864884109674128	0.676764167772066	0.867963506569457	0.876101543925498	0.883628425594336	0.787681865792936	0.814571021263969	0.870686831435835	0.701768023635144	0.872616653099374	0.870834091401524	0.877799048408517
K0031955UC	0.749677700328021	0.710859647338489	0.712854441278892	0.909464813280773	0.691166394603865	0.715454270416195	0.682715374907196	0.758385310206438	0.723970014897228	0.79351139848127	0.91252733907022	0.726036777663778	0.724062706272027	0.685389651475911	0.741365263232234	0.649295186555094	0.721977838260241	1	0.664802088074868	0.673824701495503	0.670121388331071	0.765176280592549	0.693121862434509	0.724512037886995	0.896557931923513	0.713630143535515	0.716843920463828	0.713203993549586	0.767333094573042	0.729069513368702	0.753155012996927	0.915514197004166	0.779840188765646	0.729383738081104	0.727210500691706	0.76102096237123	0.722558027444673	0.719716927563924	0.89884291125275	0.700954922717439	0.710538303703349	0.701778579833187	0.764521458463366	0.685384110897212	0.730821719491549	0.901364084483873	0.669860337610818	0.682432413945415	0.702127245444811
K0031955VF	0.825152842033576	0.813500433693075	0.893726224966602	0.695105574690309	0.892991592477643	0.890127790514518	0.87715017363919	0.805153360186062	0.801697595680914	0.845405403843753	0.627610171486987	0.878754271186776	0.879178975248924	0.874192443611089	0.860445801517446	0.811482550481501	0.891400392721523	0.664802088074868	1	0.902054319015388	0.885789789626838	0.780220577000284	0.818944363170984	0.874705627695707	0.670077238349299	0.873800740967223	0.880259988238839	0.863788625166911	0.818574968268743	0.776860694330667	0.850709776565756	0.655383601021224	0.86472728968213	0.876570443693609	0.884829661954963	0.812941430901362	0.816876828480922	0.840988476843533	0.624577415227082	0.875330882720612	0.885410859557212	0.883847571052269	0.774487427982674	0.785925752622518	0.866758413171891	0.651694280957929	0.880542762353006	0.884250765914748	0.875389720020789
K0031955VI	0.833719639454054	0.823618547513537	0.900834456703778	0.697487294962912	0.896443044842814	0.896469838699683	0.892242463878585	0.806763355627587	0.813961843009662	0.85370815287888	0.630024113255183	0.877230673732858	0.879242894569894	0.887273541142992	0.856683683626691	0.829685869253034	0.901067204556353	0.673824701495503	0.902054319015388	1	0.898878983533953	0.784359688105738	0.833436591659687	0.881928338892691	0.673274444754177	0.878194831834355	0.881135526945693	0.876878394321237	0.820807649776089	0.789466535481084	0.861053290702596	0.663652269122988	0.87376445829147	0.892711699872313	0.896203148909498	0.819623140679086	0.827669035564183	0.852105278939204	0.626663333574429	0.881833615620862	0.887601812272222	0.891394661188793	0.773971116021433	0.803147318136475	0.876759633300813	0.662399466498223	0.889678963978325	0.888063666264185	0.881756263434429
K0031955VM	0.835497553866965	0.833818428009253	0.898808359970621	0.694091894554462	0.90067218107757	0.893753019947277	0.896615516231539	0.808433635898298	0.814493087109058	0.853986962513652	0.623854347709332	0.877227520028549	0.880939352019306	0.889584216650338	0.861411257560383	0.837813562649327	0.89415714838452	0.670121388331071	0.885789789626838	0.898878983533953	1	0.788567113656203	0.83407942663324	0.875669814459753	0.660479915937798	0.875265266010102	0.874577326215955	0.878943645792333	0.821621888365177	0.800008516054237	0.860760507101127	0.651759472502349	0.869441941445378	0.890719166528611	0.889718877061657	0.821878817866867	0.828790587867854	0.865880761520063	0.621568977232447	0.880926112282492	0.888301633715193	0.88085765398331	0.768759348954356	0.808306369557791	0.868811150097422	0.651522994013281	0.882763356568636	0.876950686482829	0.887844195391675
K0031964AN	0.853146609628196	0.822206551958178	0.820268188208437	0.789233882222381	0.799912146150293	0.815844737184131	0.798704681980365	0.852551902451935	0.809480526352447	0.830012079359631	0.745958080136565	0.802840961743801	0.797512641442318	0.787621165250407	0.852543999183147	0.773899667591809	0.804547810472642	0.765176280592549	0.780220577000284	0.784359688105738	0.788567113656203	1	0.812280230234582	0.809644731240907	0.770288283888834	0.814092475427434	0.808864380132821	0.808808049849445	0.85925000076951	0.815478234895459	0.821631614578927	0.764129282537708	0.824013268862175	0.822521825900814	0.813635514745478	0.847394529437474	0.8128965302172	0.80917460832808	0.730143284138282	0.782272396579391	0.782847739934566	0.789608811658053	0.83940782954408	0.792943997272166	0.803947469223006	0.773261292263836	0.78136059324562	0.785304152546778	0.8035277639874
K0031964BCN	0.847601519519645	0.879590132857194	0.851669630560828	0.716996102962075	0.836674282256844	0.841446058152029	0.832546987211856	0.798344608408297	0.867360997637402	0.82850225929097	0.677929962725516	0.821111684337962	0.835615966797515	0.836278627585999	0.864531382743363	0.876543692643099	0.83914362238106	0.693121862434509	0.818944363170984	0.833436591659687	0.83407942663324	0.812280230234582	1	0.839232649592981	0.703834143293111	0.825146534727823	0.821000781542346	0.833074714076162	0.817009432560018	0.872489386050319	0.851921165405555	0.685089093456159	0.844605611232701	0.840879695294891	0.844680224128172	0.803542058229828	0.863015312403247	0.859194958173119	0.657140319436621	0.798411609972846	0.809268010436544	0.813710441816479	0.747318165065185	0.877678420476451	0.820069393042113	0.6788615177512	0.822730151243046	0.826238543696751	0.809922470973439
K0031964CN	0.836939420488684	0.827258361534681	0.885933172360719	0.74067172624086	0.893215882625445	0.88679597127512	0.881450835707422	0.821111466915319	0.817088609368825	0.868353693502717	0.687368489964058	0.86811620876844	0.869445903537871	0.874266090199002	0.859496367484947	0.816894856543263	0.878832577716623	0.724512037886995	0.874705627695707	0.881928338892691	0.875669814459753	0.809644731240907	0.839232649592981	1	0.722990196655894	0.889918453089747	0.893861680676835	0.890657929848175	0.827643659133934	0.816093367182875	0.866203485650073	0.707192454496351	0.883603149546069	0.889546126591975	0.895280854658926	0.819878704409651	0.829354547499549	0.844118169571024	0.673533205927186	0.870323321040309	0.872076629329014	0.875371147517967	0.787970250349744	0.809229916872737	0.871262069244929	0.704893996048465	0.872287498621283	0.874217186668115	0.879593373109274
K0031964UC	0.760814743110925	0.715040944953765	0.704873638577215	0.8868635649829	0.685413726440407	0.70426603737382	0.675966403668647	0.75309194825344	0.738259915703863	0.784874614893414	0.902079010333713	0.712525535245508	0.724651093391848	0.690627537009304	0.740973292218446	0.660901143146647	0.713293047409571	0.896557931923513	0.670077238349299	0.673274444754177	0.660479915937798	0.770288283888834	0.703834143293111	0.722990196655894	1	0.713145287018146	0.717754040259953	0.697531828724215	0.76002417378443	0.74181055352031	0.751486567018351	0.904437704571679	0.762597544965952	0.723973679327485	0.723154980123246	0.755182986446811	0.739860260549642	0.714819854332666	0.886610309859194	0.69176339132029	0.70179491434489	0.689197532768957	0.748329302761151	0.70437463045355	0.73074776350072	0.890721539869425	0.665247170049628	0.674372267012682	0.69269251518324
K0031964VF	0.827653977764056	0.822202280739967	0.885282945120764	0.732781530303418	0.886086514924591	0.894181282525429	0.885290197684855	0.824165865564394	0.806450804891959	0.864546569579205	0.676242916261295	0.874909947490326	0.873926831189808	0.86583366909033	0.855224822822914	0.799068309763578	0.864296420440503	0.713630143535515	0.873800740967223	0.878194831834355	0.875265266010102	0.814092475427434	0.825146534727823	0.889918453089747	0.713145287018146	1	0.903256701110833	0.892053266613255	0.834490383224385	0.792218069087059	0.853979683628597	0.696682142692242	0.883774459158681	0.891853205526649	0.895085334344729	0.826837578581463	0.814059612604578	0.835812727267917	0.665893391047038	0.877827865663612	0.874139958212874	0.885707492142003	0.795534855482943	0.793672914220161	0.869280627915032	0.699957259360489	0.874914319489777	0.8756394118696	0.887895094089191
K0031964VI	0.83190592784425	0.820872640543448	0.895348910924879	0.734998296468002	0.894119884760798	0.895751241617601	0.886478842547947	0.825072332843495	0.809907682050997	0.863870985055223	0.67924977439553	0.875606467967711	0.877231633578761	0.869532350308928	0.856334927257674	0.797979137304281	0.872274793191556	0.716843920463828	0.880259988238839	0.881135526945693	0.874577326215955	0.808864380132821	0.821000781542346	0.893861680676835	0.717754040259953	0.903256701110833	1	0.887345767319845	0.840021037546929	0.784061749087103	0.854942603383321	0.698891747479437	0.884149978227577	0.898325713257739	0.909759714859632	0.830491891438012	0.816683287443101	0.838440715128606	0.672467026877023	0.884160211683131	0.884737847768719	0.887246791246007	0.796190632974035	0.79337426745391	0.878042727989429	0.702360014264528	0.881771204344963	0.879249830359926	0.88670363876144
K0031964VM	0.829540837354127	0.832879471420493	0.892002052244493	0.728803116293333	0.890710771962758	0.901269012340247	0.888208464773096	0.818605800802784	0.820194879718298	0.85701920316547	0.664086745713566	0.873291581474124	0.869837802184505	0.868264580953203	0.856228868099839	0.812791288078324	0.870473784093404	0.713203993549586	0.863788625166911	0.876878394321237	0.878943645792333	0.808808049849445	0.833074714076162	0.890657929848175	0.697531828724215	0.892053266613255	0.887345767319845	1	0.831450375020543	0.7987848816585	0.854454693593749	0.679942338864113	0.875159650856687	0.891588454068583	0.903381376462374	0.831132685078942	0.816349352051042	0.853913655842334	0.6542316841253	0.884737927972373	0.880803883695588	0.878826580053243	0.790267342912139	0.808342067868409	0.87054381461673	0.694297548511233	0.86468070950488	0.868766784731317	0.884252908444826
K0031965AN	0.8582120243515	0.818511758234211	0.853970302008702	0.781261108239846	0.83018148128765	0.84909089646595	0.826077638761302	0.890111828893887	0.808807881708688	0.838786947140909	0.735860076202267	0.841044221045051	0.839263568526774	0.822476510293486	0.877426456892705	0.783394618174989	0.832040854985408	0.767333094573042	0.818574968268743	0.820807649776089	0.821621888365177	0.85925000076951	0.817009432560018	0.827643659133934	0.76002417378443	0.834490383224385	0.840021037546929	0.831450375020543	1	0.784651077425286	0.846194427773899	0.757327224500068	0.847623329726043	0.840369042868376	0.851562483816899	0.880718921002225	0.810241204644454	0.833562330488586	0.726386425111579	0.826153805347003	0.825498507301807	0.832216859053984	0.857939047521355	0.788837929672549	0.82895420525942	0.762883873194827	0.809308069741799	0.816462525228039	0.843563388040766
K0031965BCN	0.851029670034598	0.882387319567166	0.819922716118529	0.749781041138864	0.796079096451131	0.806217069085101	0.8007275967622	0.7690800043703	0.87216637715157	0.822737431265305	0.724602691427382	0.787093530478633	0.790251537537724	0.801639555142955	0.845871158436068	0.866774933634042	0.8122960701772	0.729069513368702	0.776860694330667	0.789466535481084	0.800008516054237	0.815478234895459	0.872489386050319	0.816093367182875	0.74181055352031	0.792218069087059	0.784061749087103	0.7987848816585	0.784651077425286	1	0.842144421796598	0.73055717760345	0.837640204751743	0.815766721842587	0.807128385152288	0.779254197436872	0.875380072033438	0.839086977173786	0.707148854355129	0.764124874788925	0.769651418067185	0.771979551218222	0.72030476970695	0.879883698409921	0.796921416142513	0.713658221648056	0.78223910832021	0.794455013798183	0.770355832259978
K0031965CN	0.851699885068253	0.854157935516961	0.877071368751737	0.776216167957755	0.857603992863378	0.865616565180447	0.858439628334433	0.815276771206902	0.847247959671818	0.865439154647227	0.723694233654146	0.858404042900006	0.860429032030439	0.857775095096234	0.867724645516822	0.842549442313229	0.881216617287547	0.753155012996927	0.850709776565756	0.861053290702596	0.860760507101127	0.821631614578927	0.851921165405555	0.866203485650073	0.751486567018351	0.853979683628597	0.854942603383321	0.854454693593749	0.846194427773899	0.842144421796598	1	0.752131251789147	0.889845350727994	0.886165606681285	0.879754901186264	0.821841337065558	0.850681301344153	0.862249079507949	0.724767136425616	0.845059316546369	0.849521999848377	0.851095340628838	0.781915438678124	0.833306427921526	0.861483179279699	0.739076176448232	0.859066979332391	0.856076352453897	0.840920963675837
K0031965UC	0.750276189058736	0.69946812719479	0.692666822320242	0.899649065934176	0.672322868003696	0.690503137752579	0.65802326155754	0.74668615964631	0.721007260982304	0.784311187623375	0.912838883619862	0.710843671355053	0.71061414868294	0.676386057483713	0.735445362647614	0.642631093046724	0.71094931715163	0.915514197004166	0.655383601021224	0.663652269122988	0.651759472502349	0.764129282537708	0.685089093456159	0.707192454496351	0.904437704571679	0.696682142692242	0.698891747479437	0.679942338864113	0.757327224500068	0.73055717760345	0.752131251789147	1	0.768565619309656	0.710253789518554	0.70692476914047	0.751184266609289	0.719902424574495	0.700999272157379	0.904996021589979	0.678823654260221	0.688196686432953	0.682438448330199	0.751393065851628	0.68200179408451	0.720855382867697	0.904519606853998	0.659200168370739	0.661104782192353	0.684088961344486
K0031965VF	0.848733298646687	0.842666630331029	0.890443206181872	0.790714806443795	0.886812380304849	0.889463584218676	0.875731403943275	0.832625103324506	0.833352701574684	0.886214988264125	0.739161551310754	0.874025986932477	0.881240151445583	0.869539830866336	0.871905067490777	0.827584267484195	0.88385425055391	0.779840188765646	0.86472728968213	0.87376445829147	0.869441941445378	0.824013268862175	0.844605611232701	0.883603149546069	0.762597544965952	0.883774459158681	0.884149978227577	0.875159650856687	0.847623329726043	0.837640204751743	0.889845350727994	0.768565619309656	1	0.904724962334939	0.905581373147135	0.837416889413186	0.845917077355003	0.85428585955563	0.739026955091437	0.868125556546132	0.866383504285296	0.87864084823205	0.807875832781513	0.814524176449464	0.871576461743619	0.755778975168714	0.870878974234663	0.873159330804085	0.869384391496614
K0031965VI	0.854181689887652	0.837886745290761	0.901529053531698	0.747300260870291	0.897696418574661	0.903691156298369	0.895260836269403	0.831004158450545	0.828701861574029	0.87947106129284	0.688252655153799	0.884792765231107	0.890877248142829	0.880938115541964	0.865830152615171	0.820406957556226	0.881934390527295	0.729383738081104	0.876570443693609	0.892711699872313	0.890719166528611	0.822521825900814	0.840879695294891	0.889546126591975	0.723973679327485	0.891853205526649	0.898325713257739	0.891588454068583	0.840369042868376	0.815766721842587	0.886165606681285	0.710253789518554	0.904724962334939	1	0.913177564355868	0.84115777382412	0.831984548449474	0.860157656298709	0.681568304957171	0.885752978502814	0.884920685644615	0.89306393364884	0.803805087129007	0.812177847054117	0.879524272742608	0.708436336522765	0.889016156196859	0.885508818351016	0.887031639164436
K0031965VM	0.848259916337872	0.838084185380857	0.907232944088403	0.746230311958566	0.905988550633907	0.910298157960113	0.901601285840578	0.833733516318134	0.814624591696781	0.874850511418525	0.684907657304785	0.879552227517798	0.887115768662804	0.877799247788613	0.870717430366643	0.820824060537868	0.888301710360502	0.727210500691706	0.884829661954963	0.896203148909498	0.889718877061657	0.813635514745478	0.844680224128172	0.895280854658926	0.723154980123246	0.895085334344729	0.909759714859632	0.903381376462374	0.851562483816899	0.807128385152288	0.879754901186264	0.70692476914047	0.905581373147135	0.913177564355868	1	0.84400957098208	0.831111190152925	0.858494019630431	0.678139047913344	0.894639268939139	0.891985933235558	0.893896463909527	0.800236616014636	0.810720992401667	0.886134312964454	0.707826272196182	0.886126630441337	0.886006220050906	0.89777859010095
K0033586AN	0.842043644748531	0.812090749666181	0.845742487406399	0.777147357866321	0.83452256535299	0.843596172505433	0.825637286629734	0.877624807616122	0.801887775171306	0.837958467146545	0.740228520248981	0.842280317508311	0.836581998262583	0.816978325362566	0.865567382435212	0.765095158686324	0.826697635274872	0.76102096237123	0.812941430901362	0.819623140679086	0.821878817866867	0.847394529437474	0.803542058229828	0.819878704409651	0.755182986446811	0.826837578581463	0.830491891438012	0.831132685078942	0.880718921002225	0.779254197436872	0.821841337065558	0.751184266609289	0.837416889413186	0.84115777382412	0.84400957098208	1	0.799421281857097	0.827962970351307	0.729031971440168	0.825900651631858	0.834908584629662	0.838070847166675	0.85545749980988	0.774734589425312	0.818007056981432	0.754917648446833	0.808016977136451	0.804651824964745	0.836794289399093
K0033586BCN	0.854406939041735	0.859966497106302	0.84343675598754	0.746237415198696	0.823498906342877	0.833312968396381	0.824239888942044	0.791023112564235	0.855577448206608	0.839107227520388	0.706173125872603	0.816724811797207	0.828503551813433	0.827188417766008	0.857643675810928	0.85182667521534	0.835957821741217	0.722558027444673	0.816876828480922	0.827669035564183	0.828790587867854	0.8128965302172	0.863015312403247	0.829354547499549	0.739860260549642	0.814059612604578	0.816683287443101	0.816349352051042	0.810241204644454	0.875380072033438	0.850681301344153	0.719902424574495	0.845917077355003	0.831984548449474	0.831111190152925	0.799421281857097	1	0.852045710055237	0.700421056544601	0.796282806294045	0.819439927108517	0.812635118586262	0.750001483216567	0.864062548463884	0.828655925653427	0.706896669621815	0.815280399440999	0.822180711498851	0.801491169298852
K0033586CN	0.864177709035081	0.862661543273111	0.86694249487788	0.736442767716737	0.858640550294446	0.864050940171961	0.857543346275841	0.813038017404139	0.844775216861645	0.849588177697176	0.68424124935487	0.844995624946185	0.849419673150419	0.857158723468487	0.867640908582655	0.861476724326057	0.864884109674128	0.719716927563924	0.840988476843533	0.852105278939204	0.865880761520063	0.80917460832808	0.859194958173119	0.844118169571024	0.714819854332666	0.835812727267917	0.838440715128606	0.853913655842334	0.833562330488586	0.839086977173786	0.862249079507949	0.700999272157379	0.85428585955563	0.860157656298709	0.858494019630431	0.827962970351307	0.852045710055237	1	0.67152008657928	0.836342360217633	0.846540614759806	0.846797923659441	0.772803023808002	0.840018364496513	0.853223068280253	0.693054905465565	0.837072785051285	0.847546363120293	0.83888567392625
K0033586UC	0.72118571250315	0.676432044615461	0.660517626390929	0.889555296433319	0.640875593179009	0.653897766045474	0.630950037426717	0.718947425912771	0.700822051413734	0.762707971519191	0.895032662408052	0.677312305355197	0.680841367362758	0.638660515865835	0.704377140365937	0.623762903567414	0.676764167772066	0.89884291125275	0.624577415227082	0.626663333574429	0.621568977232447	0.730143284138282	0.657140319436621	0.673533205927186	0.886610309859194	0.665893391047038	0.672467026877023	0.6542316841253	0.726386425111579	0.707148854355129	0.724767136425616	0.904996021589979	0.739026955091437	0.681568304957171	0.678139047913344	0.729031971440168	0.700421056544601	0.67152008657928	1	0.653354386829763	0.66148906893268	0.6621404767199	0.709692833368298	0.664029980488332	0.686945789249874	0.88234989015824	0.625546707804276	0.631761911455358	0.648916553468717
K0033586VF	0.819035339472719	0.794082261950938	0.885486680552553	0.716058373372824	0.893760152094709	0.893029056068368	0.881217521196421	0.813329143687683	0.786398442471813	0.856130834083969	0.658682048180648	0.885947602132755	0.878750736765378	0.870028891081712	0.844848631832085	0.781147326545872	0.867963506569457	0.700954922717439	0.875330882720612	0.881833615620862	0.880926112282492	0.782272396579391	0.798411609972846	0.870323321040309	0.69176339132029	0.877827865663612	0.884160211683131	0.884737927972373	0.826153805347003	0.764124874788925	0.845059316546369	0.678823654260221	0.868125556546132	0.885752978502814	0.894639268939139	0.825900651631858	0.796282806294045	0.836342360217633	0.653354386829763	1	0.899136883342241	0.898254268516463	0.791148354826509	0.770936233061788	0.858926612247144	0.681701192831557	0.876128369289729	0.872015259165744	0.880410523812949
K0033586VI	0.825783058945925	0.804948250495141	0.891647177377346	0.721721378671827	0.890265683587178	0.890911677043851	0.887397209819897	0.822451027540443	0.793159613165958	0.854490126518648	0.661894250537684	0.877260908414387	0.882448638695496	0.873908857577604	0.858169617998055	0.78981429099183	0.876101543925498	0.710538303703349	0.885410859557212	0.887601812272222	0.888301633715193	0.782847739934566	0.809268010436544	0.872076629329014	0.70179491434489	0.874139958212874	0.884737847768719	0.880803883695588	0.825498507301807	0.769651418067185	0.849521999848377	0.688196686432953	0.866383504285296	0.884920685644615	0.891985933235558	0.834908584629662	0.819439927108517	0.846540614759806	0.66148906893268	0.899136883342241	1	0.899188275501217	0.797300425165299	0.780817115942699	0.869501387121638	0.68459432207413	0.868079258577588	0.866870469669354	0.878488218734856
K0033586VM	0.824291863858785	0.806184722061297	0.89164981582197	0.721340829002827	0.897764090208455	0.893155661486706	0.887113385009657	0.829121038107151	0.799862386696039	0.858877588382872	0.658810501146213	0.884224090617271	0.877718627272061	0.879918040027662	0.862957240390731	0.796228174470812	0.883628425594336	0.701778579833187	0.883847571052269	0.891394661188793	0.88085765398331	0.789608811658053	0.813710441816479	0.875371147517967	0.689197532768957	0.885707492142003	0.887246791246007	0.878826580053243	0.832216859053984	0.771979551218222	0.851095340628838	0.682438448330199	0.87864084823205	0.89306393364884	0.893896463909527	0.838070847166675	0.812635118586262	0.846797923659441	0.6621404767199	0.898254268516463	0.899188275501217	1	0.791709228179801	0.780176002329506	0.869612362464759	0.684115469581674	0.881810400068031	0.868599449481667	0.889018824720408
K0033644AN	0.804701376561986	0.743457021686653	0.801159808930834	0.768278109627956	0.794889511910358	0.814108375674821	0.785824638216005	0.86236338901191	0.738066501819028	0.812454498919241	0.72475326456526	0.806931305117119	0.802156833404825	0.77117386324299	0.818580733365561	0.691433242425088	0.787681865792936	0.764521458463366	0.774487427982674	0.773971116021433	0.768759348954356	0.83940782954408	0.747318165065185	0.787970250349744	0.748329302761151	0.795534855482943	0.796190632974035	0.790267342912139	0.857939047521355	0.72030476970695	0.781915438678124	0.751393065851628	0.807875832781513	0.803805087129007	0.800236616014636	0.85545749980988	0.750001483216567	0.772803023808002	0.709692833368298	0.791148354826509	0.797300425165299	0.791709228179801	1	0.715615870094116	0.790616897878523	0.76256781406109	0.776046680968752	0.774143186154096	0.80767559778835
K0033644BCN	0.840545345170563	0.880937073417679	0.824274101819505	0.712573099906047	0.806716785608825	0.812979130226089	0.804334494329252	0.778485650850031	0.867077225795271	0.802352095458327	0.673309295637019	0.798500003160923	0.797451863361434	0.806363225001123	0.843817011400631	0.866665301339374	0.814571021263969	0.685384110897212	0.785925752622518	0.803147318136475	0.808306369557791	0.792943997272166	0.877678420476451	0.809229916872737	0.70437463045355	0.793672914220161	0.79337426745391	0.808342067868409	0.788837929672549	0.879883698409921	0.833306427921526	0.68200179408451	0.814524176449464	0.812177847054117	0.810720992401667	0.774734589425312	0.864062548463884	0.840018364496513	0.664029980488332	0.770936233061788	0.780817115942699	0.780176002329506	0.715615870094116	1	0.796975302406275	0.684021280401543	0.796875910264741	0.804283871285914	0.783701640264079
K0033644CN	0.834932125681967	0.816906562871673	0.879658362023618	0.749011823011102	0.86920647082193	0.87645086436015	0.865958250767781	0.813840458612856	0.810557705138977	0.85684943326135	0.69049716445479	0.860660963513894	0.868722586903842	0.856130924829153	0.846196511920577	0.804173077392333	0.870686831435835	0.730821719491549	0.866758413171891	0.876759633300813	0.868811150097422	0.803947469223006	0.820069393042113	0.871262069244929	0.73074776350072	0.869280627915032	0.878042727989429	0.87054381461673	0.82895420525942	0.796921416142513	0.861483179279699	0.720855382867697	0.871576461743619	0.879524272742608	0.886134312964454	0.818007056981432	0.828655925653427	0.853223068280253	0.686945789249874	0.858926612247144	0.869501387121638	0.869612362464759	0.790616897878523	0.796975302406275	1	0.722909320563806	0.880261623087207	0.875718382962389	0.87442706375494
K0033644UC	0.743626054792045	0.704375564447148	0.691723318454021	0.902857270183164	0.67054686725338	0.697085714170317	0.663418392724634	0.757329245031604	0.711900140347564	0.766978773797917	0.891799947357623	0.705434227554905	0.703435685237918	0.667188328045568	0.728582077479518	0.638917930189443	0.701768023635144	0.901364084483873	0.651694280957929	0.662399466498223	0.651522994013281	0.773261292263836	0.6788615177512	0.704893996048465	0.890721539869425	0.699957259360489	0.702360014264528	0.694297548511233	0.762883873194827	0.713658221648056	0.739076176448232	0.904519606853998	0.755778975168714	0.708436336522765	0.707826272196182	0.754917648446833	0.706896669621815	0.693054905465565	0.88234989015824	0.681701192831557	0.68459432207413	0.684115469581674	0.76256781406109	0.684021280401543	0.722909320563806	1	0.656147451958009	0.661108440108596	0.696864148409143
K0033644VF	0.82223326791428	0.813184233774607	0.886124275985318	0.689210086353346	0.88937940464418	0.888045744644581	0.888114159890896	0.807099900277928	0.809647613140676	0.845428003545502	0.629193235322528	0.8780253858009	0.878577922911504	0.869138555190662	0.849966061150837	0.811412771206192	0.872616653099374	0.669860337610818	0.880542762353006	0.889678963978325	0.882763356568636	0.78136059324562	0.822730151243046	0.872287498621283	0.665247170049628	0.874914319489777	0.881771204344963	0.86468070950488	0.809308069741799	0.78223910832021	0.859066979332391	0.659200168370739	0.870878974234663	0.889016156196859	0.886126630441337	0.808016977136451	0.815280399440999	0.837072785051285	0.625546707804276	0.876128369289729	0.868079258577588	0.881810400068031	0.776046680968752	0.796875910264741	0.880261623087207	0.656147451958009	1	0.885908128310899	0.87611421786293
K0033644VI	0.829600951334335	0.826081768326961	0.882086477154779	0.69956612118786	0.881667780903297	0.883402412377388	0.877835180373006	0.804590400938399	0.808365655288265	0.849892854778921	0.63293325341588	0.869658446480516	0.868029159009214	0.869975341640378	0.852425645680813	0.817165230728929	0.870834091401524	0.682432413945415	0.884250765914748	0.888063666264185	0.876950686482829	0.785304152546778	0.826238543696751	0.874217186668115	0.674372267012682	0.8756394118696	0.879249830359926	0.868766784731317	0.816462525228039	0.794455013798183	0.856076352453897	0.661104782192353	0.873159330804085	0.885508818351016	0.886006220050906	0.804651824964745	0.822180711498851	0.847546363120293	0.631761911455358	0.872015259165744	0.866870469669354	0.868599449481667	0.774143186154096	0.804283871285914	0.875718382962389	0.661108440108596	0.885908128310899	1	0.874570547789766
K0033644VM	0.829824917646916	0.815444857632427	0.885063697399556	0.723836377238941	0.886551177271215	0.894392091096995	0.878604854121382	0.83066046097121	0.793253313126326	0.857204195683879	0.657408392975618	0.870849043675209	0.870713132355614	0.866035627392006	0.851575742769154	0.794925775107723	0.877799048408517	0.702127245444811	0.875389720020789	0.881756263434429	0.887844195391675	0.8035277639874	0.809922470973439	0.879593373109274	0.69269251518324	0.887895094089191	0.88670363876144	0.884252908444826	0.843563388040766	0.770355832259978	0.840920963675837	0.684088961344486	0.869384391496614	0.887031639164436	0.89777859010095	0.836794289399093	0.801491169298852	0.83888567392625	0.648916553468717	0.880410523812949	0.878488218734856	0.889018824720408	0.80767559778835	0.783701640264079	0.87442706375494	0.696864148409143	0.87611421786293	0.874570547789766	1
K0033676AN	0.867808677224577	0.829196473865373	0.852273131021839	0.784375824484419	0.836204608068011	0.845449622559006	0.830015096160168	0.875667465159198	0.821044321679086	0.843113655918916	0.745373232475922	0.841966485774107	0.835827232214796	0.824885003855945	0.879106643963825	0.785864053744546	0.832783362843931	0.772380335074445	0.813155484118259	0.815650655532894	0.817591555469576	0.865497867658721	0.814007562496632	0.82279871431908	0.758193542750533	0.826995974043005	0.829025622399865	0.825205406193755	0.880422364674849	0.801165329414665	0.8253101750456	0.757026734563245	0.83939548149448	0.839469756250644	0.842966749174151	0.870486216902188	0.825182013656583	0.838442642471526	0.728104670398836	0.816082075188624	0.828293782759788	0.825809591311548	0.847832916533719	0.806468597062455	0.826335058272183	0.751973554788406	0.811816103140761	0.807825667108797	0.825698366936815
K0033676BCN	0.833268739738629	0.865639346668773	0.783455671382838	0.74693403783675	0.771284841937634	0.786715353106724	0.772321459058038	0.756012733945584	0.847672934135154	0.794229772369912	0.72135308598307	0.758647520241945	0.764769280275348	0.771429416026258	0.823994169289716	0.844809835124722	0.78967016194245	0.729180971822345	0.741695553333652	0.760133079211838	0.770375227912759	0.7943787494348	0.844001235381651	0.782557495719911	0.728500283800484	0.761620934937086	0.752437934409015	0.782067420664352	0.773143381807814	0.876045799610682	0.818130155941626	0.717887015501195	0.803031351845173	0.783581055482875	0.779337391673243	0.765245541745245	0.843788870987786	0.823291978183265	0.690219103024428	0.736512522573124	0.743965851067042	0.745897754789406	0.704833943193476	0.854079012079051	0.767275733116134	0.70430611880114	0.748643021800153	0.75754930356119	0.749764428891547
K0033676CN	0.849669801762133	0.851100051660242	0.878773230255387	0.780074401941208	0.864302139759054	0.875201413903193	0.860709351130875	0.818210347034525	0.830044787521012	0.867513029867965	0.726236143710639	0.852271064081656	0.857307542369325	0.849083652464622	0.864827018550521	0.827999955239916	0.861230425310262	0.76231017454085	0.846512693155731	0.850164581872396	0.851836197852604	0.828423823934936	0.854457054208909	0.865941992629426	0.747083204324356	0.855115738046578	0.856608548611588	0.859602279836863	0.836501460122702	0.836760861855107	0.859359937718698	0.743560696114161	0.872574568660982	0.871896385095691	0.871536906042468	0.829375887349051	0.84436508948996	0.856458519359883	0.71948888251888	0.840079338035361	0.849074756386281	0.852736395395066	0.789367693801755	0.830670071655133	0.850399108318541	0.738017249699547	0.841679954661096	0.846770029612383	0.85067432541377
K0033676UC	0.772753043901281	0.762351831512236	0.715199152258653	0.885928256948828	0.695665589292575	0.71313641634277	0.69377366881065	0.734103998996167	0.770174031092951	0.791043080799044	0.887651447546965	0.718394005929275	0.723880747726671	0.704226000299687	0.755746305779856	0.710917522049957	0.729605579312137	0.886046704315037	0.67380726255195	0.682530560954421	0.678834332863842	0.769966393013452	0.736629298164798	0.724070812165713	0.879617573485451	0.708861798179561	0.70677883056212	0.69868702209102	0.74502357083075	0.785028241905523	0.766303557027818	0.890369700219198	0.775923086121008	0.732145258244992	0.72035373207992	0.73869011737646	0.772064104020301	0.743618251044251	0.868672650883399	0.687033798689003	0.698640630453517	0.694406943825268	0.719389518341982	0.746973840595947	0.732331491553598	0.864099608060571	0.67701157034884	0.687379663588914	0.686386918960679
K0033676VF	0.834488620735191	0.842314965428735	0.860947468746939	0.755821944966652	0.865499290525022	0.869424481071293	0.862728305648923	0.819512514161427	0.816694173742228	0.852881694025735	0.712290968636911	0.853651431863534	0.852451891921979	0.84368786607446	0.851455818037114	0.79347139581342	0.851734281697428	0.748113251521903	0.836830836240519	0.84509639893584	0.844076139160081	0.824290267304282	0.824864792472632	0.857366118952365	0.734219468797255	0.861131757295225	0.858931117606046	0.866178004188147	0.828935064964216	0.802999747352153	0.842014603513472	0.724310182316521	0.858177697463013	0.867692862600901	0.866461298706103	0.82799921994387	0.819825756655877	0.846780878176562	0.694027431942991	0.843292835243359	0.849578583465601	0.850444242818981	0.787044186557583	0.800649729801843	0.841476669349827	0.723303865805971	0.832723985867728	0.839492951347765	0.848369929657253
K0033676VI	0.840797017308329	0.832242702268095	0.864760370161507	0.800079554774252	0.867413140153177	0.876443028535082	0.860960215952282	0.845256102978922	0.81867446670411	0.867106057761967	0.755121661415677	0.859085308143024	0.856752984809274	0.845951477340901	0.861075334631423	0.79435899245882	0.851877543621519	0.791384769458641	0.830614298229859	0.836261632868958	0.841713932491039	0.841929603859253	0.822202112163522	0.863659323944205	0.76597758861948	0.863287703543686	0.867581844252774	0.874422111237215	0.851486438435234	0.811891710133956	0.847129298476238	0.768057348182148	0.877028748442602	0.872035136742513	0.872756456547713	0.850293597116921	0.819837300731815	0.850166432714205	0.740054586736861	0.849802719725546	0.854280029343526	0.846700581213159	0.820792903816873	0.805010769145098	0.843348375617082	0.766447893188517	0.838012898022238	0.837982432458805	0.859312784368504
K0033676VM	0.845662034579908	0.847433367924435	0.877193198852999	0.757071870436766	0.870094193447496	0.886342987235641	0.869803044502745	0.82665960201719	0.823407310031051	0.851192836541111	0.701617230544959	0.856454181443235	0.856335060012278	0.85671213385204	0.865682580931962	0.825739167716547	0.855234386374045	0.741455800790559	0.840851359031222	0.848539226174344	0.859045119833892	0.827633547119851	0.843536164478323	0.863387276477201	0.724185650996406	0.86376460789116	0.863668022573133	0.881783000017151	0.836256505673962	0.824356369969751	0.851440391190241	0.717376284180385	0.867310356098357	0.873312717535924	0.877547929543566	0.839968880512978	0.828773888086213	0.869409105823297	0.679655733033005	0.851573043395162	0.854853450336105	0.851182548990131	0.798166342516687	0.822999309052653	0.841643023841701	0.718424759524265	0.8411578317837	0.849654199720387	0.857890731363642
K0033720AN	0.840823768988061	0.800082032534549	0.824571532534048	0.768234569754624	0.807694469411348	0.820690858936184	0.802869408467984	0.877494571241116	0.795940353031377	0.816569794684309	0.732910145706613	0.811400788779733	0.809230038809843	0.794549769328608	0.86044214200385	0.768610903605169	0.801732698715287	0.752132954933956	0.787850979469023	0.791496096881202	0.795102454768678	0.85836790774295	0.788165828897867	0.804493553757788	0.754252123455223	0.810544957937986	0.811639805997319	0.807769705425181	0.895678907758657	0.774511612525748	0.819278086531518	0.75162960100441	0.837722510659067	0.823020797433031	0.8304209941183	0.871851994410363	0.796899121400911	0.814268873884888	0.717478792305317	0.807142765525478	0.799962135052089	0.808938061867022	0.846414856658789	0.767369664980696	0.801117582285826	0.757422121895927	0.784560818436384	0.787815080283352	0.811132453082386
K0033720BCN	0.85235102110976	0.885035987300457	0.852233511197487	0.734442602124434	0.836145466809388	0.841775550676106	0.829088721904981	0.800236757901056	0.87326071035423	0.831750433598347	0.691491882362015	0.832833202764063	0.831798115758717	0.83162784467274	0.868577023935978	0.878791282190591	0.846316975479601	0.712878467389402	0.820223450147041	0.832409550740284	0.840455296397392	0.812780792854212	0.877596586018081	0.837360224542993	0.714459793752834	0.822682435873769	0.821080141153517	0.831309028473812	0.832604062168536	0.865239697073215	0.855775951428831	0.709961641283894	0.851229740360688	0.839353525004959	0.839213320849322	0.814167149205284	0.854828532407131	0.860827393893103	0.684755724650631	0.803491248193984	0.815976739415741	0.823142746038138	0.754996322075599	0.8618045227226	0.821793514504757	0.696613139606557	0.820644335573296	0.825767575407671	0.819527053991603
K0033720CN	0.831970862272549	0.807678271389249	0.880838203080209	0.739478601378729	0.879935022145175	0.880475079214087	0.870466705752553	0.81913180336637	0.797897684279524	0.864473524770919	0.68153469068933	0.87171758335533	0.874694737788355	0.872695206347907	0.849170513827951	0.795854065753792	0.877911932414689	0.724612493162758	0.868221363028053	0.876302117977513	0.875560330264705	0.801915023711044	0.809511414080591	0.865712844782539	0.719516604516674	0.876305850509012	0.872975871645742	0.865604739586989	0.832337826324958	0.77829228248298	0.854482476642331	0.709865440424359	0.881628925833723	0.887036140815957	0.88652087062783	0.820782893742102	0.819062744151181	0.838067475228448	0.680615446079652	0.875023667739119	0.874906974717502	0.877857656205039	0.799181486352258	0.790652882483031	0.870635527249997	0.70919084255679	0.866251348011236	0.863390423440861	0.876514501677307
K0033720UC	0.764661939753258	0.732356405168175	0.716588966742964	0.901948123271032	0.703898586616539	0.720000649007942	0.693744054751058	0.762357874322654	0.751592558620756	0.797485019764392	0.900264618623449	0.729811469052016	0.728483423122526	0.69954377391114	0.753256032056117	0.677233985681523	0.727791194301537	0.903334107156824	0.676245272581516	0.683662581855547	0.677274409900827	0.790074364879059	0.718540364834174	0.729315704716854	0.897995767658896	0.72167056139864	0.72616924042704	0.718154052145323	0.774312416738934	0.753617930502514	0.763499752001452	0.908161921649156	0.784994114537165	0.735275078998907	0.729652228550155	0.768535550569919	0.742631629741096	0.731453017849417	0.888898081854322	0.702606340109834	0.70691788312584	0.705528009894412	0.765147929273412	0.707336953803072	0.740153442910517	0.895611534693244	0.68044319071409	0.683164712589161	0.7075295195754
K0033720VF	0.838928208792062	0.823809271599428	0.890197505385058	0.738057876408711	0.893297269124215	0.893172228870519	0.875444639965067	0.818137954900418	0.814892948242218	0.866484518395981	0.678029482551125	0.87809873759025	0.882999545014584	0.873845778085247	0.856823457069977	0.812013480582155	0.881150268345411	0.724945793752221	0.878268280263325	0.882543023656067	0.885801258429309	0.796914257749717	0.828829599309386	0.879376475487865	0.725956757005698	0.88329308888476	0.884939052830744	0.873727630661217	0.838377113879307	0.798221453451986	0.869457005612739	0.71592194771388	0.885649648657783	0.892443530083286	0.893223134656936	0.833309879642349	0.828910629241026	0.853703506445186	0.67661013900133	0.880765073809148	0.879116060270187	0.891263409192088	0.803583675611409	0.800432308411147	0.876029034564271	0.707795587192087	0.879511490100378	0.872153562593965	0.880072400276298
K0033720VI	0.832877723356564	0.812617841371164	0.889312952249033	0.730736266114358	0.886245036159027	0.883843481175454	0.878383787976661	0.813614992929699	0.804815748502083	0.854195908476416	0.67023118885685	0.870847597608598	0.886565587427253	0.866182371274146	0.851791976544144	0.803670785803552	0.87615086376794	0.71658723176005	0.878974155123095	0.880882541738906	0.885219908000817	0.788578218250906	0.817027679225132	0.875207061277212	0.713909595545374	0.877846090882624	0.883184940845835	0.867257595615622	0.832753321900904	0.784497913907937	0.864120980496235	0.707707369057324	0.885323736862622	0.893021148542562	0.897003390728007	0.821723256649788	0.81791628772935	0.843669902013957	0.670355507521632	0.880711466306289	0.880571357518061	0.883489308117256	0.785304866062118	0.788976328657343	0.879153310230167	0.696373641719572	0.866610728318008	0.874593673374792	0.875955448242319
K0033720VM	0.832156359280249	0.82972521394673	0.886681603458706	0.71428645966108	0.89324231925143	0.890880374603411	0.871279745844245	0.808137200861536	0.814123908909418	0.857108328952376	0.663424284978697	0.872266475687598	0.879848753143246	0.875906714731268	0.856436425332336	0.825143705331544	0.882157564389222	0.704346170249235	0.874784261143106	0.882718560849029	0.881886292562109	0.789062696275958	0.836539484587761	0.878298416607823	0.699290970138605	0.872299883104835	0.874965783771772	0.869403771975145	0.821676419694541	0.797684778376085	0.86143702654955	0.692695641678957	0.884922084561877	0.889973209074745	0.891043638070497	0.816207219833837	0.825879084292002	0.856147994054562	0.652877015695574	0.874162667753675	0.872923063425936	0.882815860961453	0.777740500184066	0.802633759455601	0.87030269186675	0.68677538468357	0.869649061069557	0.870793071524317	0.872460218277881
K0034663AN	0.815355047314554	0.74902652189135	0.811565990490224	0.740172583127572	0.785991219849888	0.804292354905065	0.781066389326005	0.869225948109265	0.740423292866727	0.782226731650169	0.683637557061742	0.789916964505632	0.788858480809731	0.766115771749404	0.8316626965706	0.708836333839266	0.78809957822078	0.719681633663448	0.775053088872034	0.770046814895094	0.770441543148042	0.823684825911481	0.736522242973548	0.775039899229825	0.711375435579081	0.780512485417918	0.785718455470355	0.780601292207585	0.870451104233797	0.7105099316313	0.776100911610711	0.710826663255029	0.791683692526382	0.788259957953171	0.796885016334332	0.852051676642638	0.743692474904986	0.773776733556815	0.683095976705043	0.781929461522415	0.783971726816939	0.794499623784583	0.858327046762945	0.709877936655697	0.780557447474286	0.721034311446558	0.772333894476903	0.762926903780206	0.799018278502136
K0034663BCN	0.849875632594715	0.881818805409207	0.833305534526666	0.742838116711931	0.809061882818493	0.820888098113682	0.809425234590872	0.789734887871475	0.86631992491538	0.817836803040747	0.706206102764219	0.802385226967436	0.810343608571026	0.817176799201961	0.85484078545906	0.874743145607425	0.824168366437052	0.716394508387597	0.793160682541192	0.809157262227121	0.816547755410675	0.809271296846921	0.867108358723238	0.812742193470067	0.725423945976312	0.793817460983009	0.794250004378728	0.804450872430044	0.810369389620076	0.881084984114518	0.851151373534214	0.715238057947336	0.832326997112411	0.820652268992937	0.811222454354798	0.790511423279506	0.861015349690869	0.8561424530409	0.690578189639556	0.771941541009358	0.783631561932039	0.783662662087222	0.72766906018523	0.867570747747369	0.803000255541182	0.695707980989088	0.792486792710567	0.801172343607761	0.781334163096559
K0034663CN	0.834674263873768	0.830497759670696	0.883077637833073	0.742428298527396	0.880590486329503	0.879091002019272	0.876749232898905	0.800593119052557	0.819054561648973	0.858204907390508	0.68017887319207	0.862073286991795	0.860427237703318	0.86306644242174	0.853583957322378	0.817711392363801	0.880514203672608	0.716583371479052	0.871738078719049	0.884463923445875	0.876255709757909	0.789655342961773	0.838181916318055	0.875905759414047	0.710083074432466	0.863587508715727	0.871989935866753	0.867238581209678	0.817366027053864	0.809360413807036	0.868763151668122	0.706108942408163	0.874197639330805	0.882363764237931	0.882758986987198	0.814420236016931	0.826405727144807	0.851617744314694	0.670688152215457	0.859111826787418	0.86579837931245	0.870935026061126	0.777045107873193	0.800737330135728	0.866490706480565	0.697838401821378	0.866748635529746	0.865498260988513	0.865646364436242
K0034663UC	0.686041667083903	0.640532237723938	0.618458006993465	0.894352016292553	0.595700130274137	0.619902493139755	0.585520973436617	0.688040237850556	0.653475644889483	0.719111004826663	0.905169521258935	0.628697648351557	0.627776743174307	0.587357894676372	0.662330103581896	0.568656451225338	0.630389644291545	0.89606094669885	0.577833689251545	0.576871750492486	0.56804008599989	0.713255551603902	0.61779459964124	0.638875213972879	0.884420207005195	0.627407437724296	0.628556237449469	0.611163315461814	0.688916692835043	0.673406510307046	0.678473642923672	0.900917256489676	0.697951807819025	0.634156301650535	0.635498157217041	0.691310544986984	0.647489627591675	0.633230445404801	0.891562140480543	0.602579787339197	0.611905757831274	0.608558034262576	0.698769603673542	0.620922502733737	0.643865465975503	0.888293904849097	0.575794610139482	0.584490841089518	0.61547941474186
K0034663VF	0.826668199952306	0.821350089001402	0.89299828099646	0.724796631661073	0.894350130747657	0.896046230103001	0.885253682503765	0.810305573231106	0.800582384655167	0.857308942132401	0.66083829040241	0.87007269705415	0.875835865658202	0.870610882530731	0.856675507342816	0.799258269935372	0.875038980329967	0.704204686094011	0.880086930587878	0.881798446705141	0.886155289599792	0.788487115690648	0.819931889187451	0.880181883990068	0.701726478567821	0.879805367478519	0.891876809379074	0.881268745456413	0.835163188625364	0.785866946551201	0.844908392094615	0.685523048387601	0.871136307099265	0.889269592299063	0.896342028482133	0.823995816956523	0.820759536447559	0.851247815189629	0.65624812298121	0.88588425200763	0.890084735539226	0.885091906649998	0.792191714735774	0.788058090301966	0.868544683283908	0.681264468808229	0.873507699459598	0.878516858417129	0.88670951239664
K0034663VI	0.835828456869252	0.823296158341713	0.893828661624483	0.741909115381127	0.90012148150255	0.898189498802117	0.890785040911454	0.830712647410405	0.808171515262914	0.860489420426217	0.682192640979243	0.885866464843792	0.877585663007226	0.876280317050584	0.861784223031406	0.799662345548786	0.878762249249295	0.724730304230991	0.880211250759282	0.887656976709935	0.88413464925211	0.813600371576996	0.818692084014457	0.879934963894732	0.717272515481799	0.888846486496884	0.896058613783294	0.884676898284772	0.845442406302381	0.792405648970002	0.857097797993038	0.708236236127061	0.882279835517002	0.893109321529859	0.897965187765003	0.841075337705736	0.813862772819107	0.846984545730517	0.674508999404736	0.888172863711681	0.8888862941422	0.888251756150245	0.809515746915311	0.78333284180577	0.87091573369117	0.70531792065399	0.869756741516742	0.875780813219657	0.883706388754987
K0034663VM	0.829674122041672	0.821605770970522	0.888627746770743	0.73289064369831	0.897255492396933	0.899443301250518	0.886177765354323	0.821053334382669	0.80709712880413	0.856355857334439	0.677381309915162	0.873857950466445	0.871141394123723	0.866400859580534	0.859763087682187	0.803715697407849	0.87733491294007	0.72310913336286	0.879132348391535	0.882766843884879	0.880012684031431	0.806432071602633	0.824884981510612	0.884678487494765	0.71359145125886	0.87835523902866	0.888130570081727	0.882521622353624	0.84369771999112	0.795713637581334	0.853514126617604	0.699781318642425	0.879988777098447	0.891633389425437	0.898431665111889	0.831554355692867	0.819640859923824	0.849610902230224	0.66648159832272	0.874627638791941	0.876163498353295	0.88533875374873	0.806532028257784	0.794602830209556	0.862696218123871	0.702580497201062	0.868925481195394	0.875175272464971	0.886031895899651
K0034975AN	0.849926741271415	0.801029114349134	0.814238744219263	0.785797725385334	0.801694710660544	0.821436659122113	0.795729085380902	0.878133952209736	0.794904806958762	0.820888467162904	0.753016856157849	0.811665573239603	0.808409026091818	0.7890522708523	0.854785757324252	0.756598478958767	0.79974424388188	0.777562933686272	0.778519494384132	0.779370191114388	0.787609385197034	0.848117592362412	0.788523319630503	0.802518266315321	0.767484986156882	0.810199054069421	0.811010332479954	0.80980212568671	0.883267779214181	0.774363920912905	0.804121652254185	0.762705530597131	0.818935744914058	0.808788769173884	0.817374401329018	0.875733311734986	0.794063419124154	0.813782637493912	0.734857834121824	0.794217372259456	0.801649239231006	0.802854269160228	0.857475170051085	0.771095354173905	0.786823307751591	0.766289895893234	0.773591290871816	0.774648847274765	0.809830323318523
K0034975BCN	0.862404613602483	0.88064846394117	0.833667367171585	0.771807997669567	0.814559633115787	0.825384412519459	0.81165980402876	0.796055430201875	0.874873364857843	0.839783714330712	0.74239636486351	0.810831084977073	0.822411991702633	0.823735601770553	0.860015429958823	0.861963154429588	0.82965926229517	0.748523025328871	0.805382762947694	0.815028324500701	0.819348551557995	0.827765372794846	0.870701571010712	0.82854024488805	0.760730500364074	0.817495704906763	0.815306784611007	0.814581123247932	0.822884363165157	0.88410359127291	0.853879318801527	0.745789067552998	0.84874489440243	0.833927876606981	0.829891544444904	0.805042474795813	0.870337086783273	0.8522470046865	0.725414021206087	0.792892239418723	0.793940478595942	0.800873397660007	0.748379723660265	0.864974305699608	0.819131540341212	0.740349087686084	0.803744623601613	0.818058412072832	0.797207657580282
K0034975CN	0.862345570685108	0.857891834427825	0.876739355482579	0.77252176110181	0.862592982997898	0.867219057252072	0.853557739703776	0.827122155723797	0.859880698998375	0.864429515969627	0.730596627037988	0.854482451238728	0.861648177459116	0.860079472154821	0.870912140446492	0.84761638761228	0.86558225208947	0.751428574375321	0.847839177444114	0.857604676911623	0.856973913387785	0.837056205697587	0.857494899222759	0.865321325169534	0.757604125312354	0.853725708327613	0.857114365949965	0.852675977042519	0.834872339460457	0.858001414455284	0.880943213438237	0.752941872764102	0.874066934191293	0.871451988278175	0.868469287141571	0.832474688888061	0.859180428080016	0.866901090289113	0.721475023043863	0.842547145340782	0.851745252095606	0.857979015461428	0.782062915933034	0.835454605810477	0.857136968734397	0.735525256492461	0.842319943051338	0.850525306441918	0.843451955560752
K0034975UC	0.731426812473454	0.700265622141605	0.665466181344587	0.890763755049775	0.647354517503307	0.665822493496433	0.633195008720664	0.725246824216504	0.715856961643398	0.762565864265639	0.906373705957608	0.687111209190056	0.686324290200095	0.652733345378596	0.708342708539889	0.642494941049746	0.682514986281838	0.896666919244387	0.627957052602358	0.63415787834591	0.629358975876052	0.746852400069835	0.679765396065671	0.686652027390706	0.897579829405592	0.67691220626592	0.678822403550754	0.652078716359017	0.732160432648953	0.72718713876978	0.729714150026317	0.908336636362328	0.741794849052221	0.68739190554313	0.682215780971143	0.725330547529694	0.709325226481332	0.685642724942289	0.899381218340572	0.650138700249602	0.656188759574156	0.655716781351941	0.717857806274375	0.680529182599515	0.696277994083674	0.891316091830286	0.63123512908816	0.640728238223684	0.655067628681528
K0034975VF	0.840439766848383	0.825850088785612	0.880042732872296	0.765014486716403	0.88236799202764	0.889528966511017	0.877462285545749	0.848003637305215	0.80625857654592	0.861656405595008	0.709657528069403	0.878145218631986	0.876062541354079	0.861223961014871	0.855246470815499	0.789996076243472	0.864306537871223	0.752901915999981	0.852746362465342	0.86168862256405	0.864540673906098	0.831279161369259	0.818695255074867	0.881053306118862	0.737217003919853	0.885672870375352	0.891063799274704	0.89029439667548	0.861039801085533	0.793342394531982	0.854885488564133	0.73039144730403	0.880226744780727	0.885225427339257	0.89457952849844	0.852701302708558	0.810350877930839	0.851396434569049	0.703287738112905	0.880597017024488	0.878053012692161	0.879199894381457	0.824104270590933	0.796096840411031	0.859040437781432	0.735749151962321	0.853931447053001	0.863436568198778	0.883293637682407
K0034975VI	0.827215323379743	0.822117363116116	0.885548443440147	0.739104811611423	0.888577163846097	0.887797709759257	0.882293351776731	0.83027011150602	0.804856483856772	0.860759211491358	0.677897989835612	0.87790962400417	0.880641829550475	0.863415880467425	0.855577035440504	0.785024798222449	0.863167968369618	0.721676146255056	0.86408448046964	0.867338110145583	0.868605034383866	0.815439477642594	0.816861522460859	0.877077861609945	0.720059281702531	0.890225544500649	0.897221165194179	0.88728169135721	0.840981289434771	0.783093618910878	0.845794479602003	0.70639546806954	0.873306106520008	0.886878363582204	0.897686051518718	0.838555067788425	0.812992836818472	0.842542749188434	0.672248764673928	0.883537562579535	0.883643218319532	0.878553846840253	0.813921564205337	0.79155117360038	0.867019159166521	0.709797690472654	0.87032242107262	0.867012860925447	0.886883448791103
K0034975VM	0.830289535248549	0.835106107113967	0.879148651752229	0.734745229299403	0.882359526439052	0.893004158904696	0.884742930302005	0.815383465321249	0.812747638127213	0.856592229886856	0.691141064865127	0.859299377410319	0.867335705015914	0.854328875189447	0.853747627463293	0.804524324175676	0.858754645313973	0.725590658414547	0.854256087147469	0.862323202718516	0.85752288841228	0.811106523391301	0.824243982934315	0.876266590657472	0.720781563203057	0.882255908867759	0.88956533102729	0.892256587040358	0.836616637103248	0.803899091697801	0.852395952666854	0.696261756627543	0.874670448857381	0.884498015551447	0.892113442727305	0.834257466632748	0.818757242908668	0.843631061058023	0.665691869661749	0.86905776071407	0.869701911575443	0.86684135091404	0.801431452455531	0.796722443750878	0.850492740608511	0.699062149337118	0.854699699042205	0.855276263420823	0.869156166812276
K0034979AN	0.860195255969466	0.860392516416763	0.843977458664675	0.777158406802901	0.831846004670758	0.842019575445568	0.821102454582731	0.842545462144869	0.851966851005314	0.84450350984772	0.743650579849893	0.832575810651679	0.838806648245218	0.829851409537322	0.868051772790579	0.838065008687942	0.839055021231705	0.762240207742584	0.817600273713672	0.824301820157265	0.820604829648376	0.841235153370128	0.853402785521595	0.841913193702394	0.757576370875553	0.833688526555064	0.821428805223783	0.824673033392156	0.862753707289388	0.849359231089465	0.852885383782714	0.749841418428256	0.852423928970674	0.840446600762349	0.838517094342604	0.843276608596478	0.849962786893829	0.850750088595039	0.71431694685995	0.814157836276855	0.814074096566855	0.823948009564065	0.801111991276992	0.841936858328142	0.815017899263599	0.750491183542942	0.810541146849597	0.811120368640648	0.825236294153251
K0034979BCN	0.8514151219402	0.885905313329068	0.825075712916168	0.745582929979582	0.804584673229153	0.809707133431287	0.80312771854736	0.789175390664117	0.874003914526439	0.824351557654662	0.719462028810411	0.801334248427775	0.803662663677001	0.81007077095564	0.857255969379465	0.863508329350657	0.819506897728957	0.723501635927893	0.794585530841727	0.795968772865437	0.810293501785913	0.813260629630017	0.870279311788787	0.811740740394377	0.736235268675008	0.797899606198924	0.799804823443868	0.80320126309473	0.807528185888207	0.883892112466606	0.848247395280802	0.721724917212091	0.835693224693402	0.818568298860478	0.808705486435357	0.788699933653434	0.869218757720143	0.853474612486788	0.706665774816808	0.778681302451651	0.783433346796987	0.786998446792662	0.730242369981453	0.872365533787501	0.807880892914482	0.71607909365363	0.794442431009494	0.800881908078583	0.784878084088163
K0034979CN	0.844827400332915	0.841396580590977	0.889923556345423	0.764196975793276	0.884064010582803	0.879180071313636	0.871066243180832	0.831874537260127	0.831862532755336	0.876817905173897	0.721427824059738	0.873102008471148	0.885379488595012	0.874154804606312	0.865039378379335	0.821569175940758	0.884187984897831	0.748133394109662	0.872006047292395	0.87864733896867	0.868267377280456	0.813868523735075	0.83893002716536	0.885478884007338	0.743528539289363	0.883826505819812	0.882085469279572	0.871519609021151	0.84149465289527	0.823826869108818	0.874236340352176	0.736598405866565	0.890872067006627	0.886573148055892	0.890176802540217	0.826618677127493	0.839836855031897	0.852494713234917	0.711461065732951	0.87383104086329	0.869744585721457	0.879868550481667	0.786646971290283	0.821805046803646	0.872892675483721	0.730421974619902	0.872025999890866	0.868195336932793	0.872611229402198
K0034979UC	0.722403867077852	0.6927625799613	0.668667023028159	0.891799544349689	0.648594699296304	0.667588062804426	0.637510037696489	0.728481519107425	0.712603657645255	0.76231900059034	0.914465919645855	0.682756626495454	0.688829500980347	0.647905030807115	0.713460825003466	0.635133968797745	0.685125257904417	0.911478205633373	0.62948787787056	0.632388777373856	0.624013139571063	0.748938323606438	0.671652500512167	0.688548887470338	0.896477483299985	0.671577797969984	0.678958388973124	0.661623074679949	0.732572879775242	0.716197419840282	0.725204521993817	0.913632040452922	0.743006676290123	0.684011333994482	0.681980799733098	0.727146469295336	0.708835533075871	0.683659538202497	0.898610932328732	0.651822846210715	0.655295322654707	0.656058418221947	0.719408352041141	0.676486097000786	0.698048421602195	0.898480406564676	0.633777332433441	0.637936524591253	0.654977736298231
K0034979VF	0.835696117209483	0.826659344491733	0.89068294034091	0.728334792966619	0.890829539500253	0.896735143259001	0.882057052593208	0.830487050272081	0.819912880943279	0.863250224773214	0.680383845936614	0.882944471121202	0.888991265200565	0.881855726633847	0.860212853141563	0.811128639028263	0.881396663546121	0.715236527037316	0.887984338649527	0.887100669726844	0.885880182622133	0.799053614319799	0.831590484709599	0.883999173605841	0.707394701917058	0.888183765716182	0.889202592916242	0.879732572151662	0.842762119580665	0.790431613385249	0.854270439113643	0.695592900086512	0.884477592108123	0.89395635819629	0.891237481981365	0.832833063484796	0.822372838653903	0.848416312983276	0.666481641502695	0.885624224261983	0.885161134711806	0.889494039927504	0.791571831576047	0.801308312232076	0.873782028317558	0.694577388401774	0.876547409337213	0.874037983942207	0.891245124303078
K0034979VI	0.835981736389144	0.828296703971401	0.891291813065812	0.740304278714711	0.896403785225124	0.894332600952148	0.882000871826681	0.828452515320682	0.821178259595043	0.862052472812133	0.684180172189578	0.88399799622269	0.885848974463049	0.877999040314355	0.86059889071837	0.810126245288415	0.878484245077307	0.724603466652086	0.887087214667801	0.887372861139023	0.879937864378332	0.804238422238162	0.826373684290939	0.883693178785808	0.715029296643705	0.893150356052921	0.893770629822567	0.88438552625411	0.834221326732477	0.793828582952723	0.855430724528268	0.707179873623928	0.878034974049289	0.889569686349137	0.891701638979661	0.83415173083582	0.825178892970678	0.842443536452203	0.677937531181828	0.888294315702786	0.890306909578743	0.894529232017318	0.793000316083858	0.800544899712365	0.872926691728	0.703894134917591	0.876839237204755	0.881893278332524	0.889158517424025
K0034979VM	0.840365347856209	0.825501673508346	0.897043307142428	0.723092437839416	0.901016412838203	0.903192162516004	0.886010048692437	0.827186711393794	0.808053157374358	0.86389550501505	0.661710851817701	0.886226431864954	0.890706553740748	0.885505412624413	0.866198625713363	0.818644984098948	0.881356792229716	0.708665244056009	0.888846679531272	0.895529314603832	0.889938027195737	0.800623121615981	0.830193237616864	0.886066610600838	0.705775579774361	0.896930879650579	0.901653295540931	0.88359090960189	0.833889458263485	0.793821061686965	0.86030764196206	0.689873180234008	0.883811513696857	0.892622518141605	0.900086796688481	0.825375979495115	0.828829085038434	0.851859197743089	0.661131746005928	0.892256581699343	0.893251502727153	0.896437282090304	0.788375564859535	0.803093109726762	0.875029774334684	0.692193819736104	0.888445711240282	0.888172810139426	0.895418948020418
K0035001AN	0.862532796047608	0.835003365421552	0.858473798032643	0.79555752553757	0.844369921650245	0.859041922665548	0.83350350285896	0.877113263062124	0.824020816481684	0.850734273270265	0.750537905387786	0.843288728144318	0.844177452153414	0.827282892654091	0.87280016487539	0.790715788553641	0.836363468760705	0.784681854695926	0.81650783618118	0.829275894764724	0.827087403330527	0.861599069885744	0.834553750630485	0.844222452748264	0.779895973956732	0.84881999947787	0.850308907990146	0.845183892657477	0.884831143541749	0.802670289782261	0.834699324859016	0.766037451893595	0.851540440661366	0.847813062444318	0.854139654809123	0.878721706408484	0.829033968277116	0.84193918459594	0.731211187487714	0.830469765454395	0.833212583434623	0.841527142019088	0.858576087845208	0.802928518346034	0.834094622709064	0.773877511153111	0.819790496733194	0.83258386028776	0.85006843028684
K0035001BCN	0.85095063245504	0.885344468134004	0.842777978556094	0.750702709068609	0.819071934511014	0.834889593766673	0.822825185258896	0.812823156264367	0.863853707318744	0.829033374534226	0.71448469441238	0.821377995804511	0.82480086637496	0.821548778594021	0.867269782711731	0.85902159511859	0.823826375210926	0.732972764266733	0.806932979180955	0.816153557266975	0.819905350715132	0.833111285094003	0.878842589598237	0.832164087748809	0.740376481756636	0.8244596334367	0.820514662248431	0.835742605072322	0.827004890129707	0.868981724834954	0.841727387207428	0.721694840080248	0.839798540956426	0.832202282259891	0.831697005971265	0.818983010015211	0.85365331641129	0.847732705166532	0.691867502024341	0.798466001239905	0.801564484991561	0.801151598730153	0.772547256811861	0.86584108423008	0.809770615075794	0.719252798191721	0.805441424475271	0.812539911950444	0.805440158955576
K0035001CN	0.839578450392241	0.837836146022705	0.882791324809066	0.755126443010856	0.871442705837181	0.871542809916471	0.86421604425092	0.807623701491553	0.829336630031919	0.863755922192215	0.709580976068673	0.863628737461213	0.856394874823143	0.85502617077111	0.860210341125232	0.822020790221384	0.879435656940279	0.735157728967993	0.868061581739821	0.872068987970887	0.865053375780503	0.816033220034894	0.841123966453247	0.873148338281006	0.74025543305854	0.875427843919901	0.871281227906512	0.868204355276954	0.8245173052332	0.819707193732405	0.86952858865628	0.729687960743348	0.874486189827164	0.874696789294042	0.874669794803259	0.818150443973529	0.837808629836238	0.846609947699761	0.706734712229805	0.855333717682553	0.862818651703568	0.871779562384587	0.78247929440999	0.820458268968067	0.861712781127961	0.731514020943848	0.867907990703522	0.855962532270546	0.866179723983232
K0035001UC	0.791547449609386	0.753514192708456	0.745791642385656	0.899630115579836	0.727162110233015	0.741593235724454	0.71183905789012	0.774181621821441	0.767833237494722	0.810054235375091	0.89022635042301	0.743347188974825	0.748947224012265	0.720325078186239	0.773294399491724	0.693751841093098	0.753669073330092	0.895167121939916	0.70452481752406	0.712309799637541	0.708797800053628	0.804737744050055	0.736096478990119	0.757565754849114	0.893565270680876	0.742280277108646	0.749880348062465	0.736367052561884	0.784611922434833	0.773807276986663	0.785253556176642	0.893653300817445	0.79494350486164	0.759811120352067	0.756570944990534	0.782772873278557	0.772737129196548	0.749905866306414	0.883273725882052	0.723509733219952	0.733776197657306	0.730843080910539	0.772096768534075	0.744833743163117	0.766997285634876	0.894623945821196	0.707641881441202	0.715634595741334	0.733740659701762
K0035001VF	0.839928059129655	0.827480768450291	0.893485884489747	0.704700598145459	0.898095213985394	0.896225044276216	0.891947447251247	0.813683265822582	0.818611981283169	0.857260867567562	0.643832945349411	0.882142913038165	0.879032639934578	0.877677456078829	0.859079354709336	0.825439464811007	0.883509638398814	0.683440010099949	0.890603391418332	0.899609477379282	0.890053053770181	0.799046367215691	0.834627953561055	0.882622590858622	0.686088742654741	0.892417463867312	0.891994006812728	0.883615272304998	0.82438997813098	0.797129521145418	0.857417308776104	0.671065273895835	0.878269244286074	0.890731250656386	0.896215559739268	0.815474369770423	0.828722740202805	0.851663175661033	0.640737512843656	0.880768029237301	0.883426325209928	0.887195815209957	0.7826729169125	0.808798146923148	0.875395591295802	0.671174786652335	0.893222091616356	0.891606786495334	0.885290790942952
K0035001VI	0.825028963372288	0.815378399599339	0.891020314032943	0.702230682770648	0.895030947708288	0.896108780290522	0.884660137790722	0.809071289386608	0.802962852633858	0.847435477560054	0.635956645821118	0.875021374028398	0.87039206358096	0.874813143330397	0.850649611766462	0.802836653774811	0.875274544288119	0.682922666130805	0.881445268214552	0.894184644094255	0.886126325873352	0.788090578145849	0.827035070478142	0.876935861641767	0.681598034946494	0.887895459769861	0.891832862343391	0.878101854022466	0.822117129502539	0.784408179491427	0.845944738707514	0.663845217089215	0.866764190277589	0.890476618734115	0.888657063534653	0.811342004815315	0.815403652220782	0.841023789122336	0.630451022661427	0.880956214299353	0.881510812935309	0.892599805620165	0.780260088548027	0.794555390738903	0.875030964390843	0.670491334214905	0.87882362525782	0.880655984648675	0.881366127025009
K0035001VM	0.822912668779636	0.81080684771119	0.892353105011628	0.682078393305533	0.893363286206025	0.890119468393024	0.884941832209122	0.804310434209772	0.80116634776109	0.844579640726492	0.617279390718169	0.867603705283973	0.874781970217804	0.874988301429673	0.839490466203823	0.821374618138063	0.874141719770301	0.663236249734385	0.878229351906296	0.894461133474998	0.890499414548828	0.781536352349977	0.827711732486062	0.875640130954771	0.665393519808902	0.877674575057437	0.889283529953043	0.871570102218127	0.810381166809579	0.785827456592391	0.847122903404049	0.639875524176047	0.8649677984993	0.88775082802655	0.889026491418253	0.800221034206911	0.813621222914893	0.842436000830939	0.612587395963582	0.87347647820025	0.879570839293636	0.882741467756316	0.768744162003253	0.795963761277558	0.866325399999493	0.645405777855161	0.878254076677094	0.880940330847243	0.879131860860538
K0035003AN	0.838927644255148	0.78117736151865	0.832462546594829	0.794821576869034	0.816511085402296	0.832406161495068	0.813173813134857	0.874787517896361	0.783326242214272	0.832315053746452	0.754035624376446	0.836556268448525	0.826216786172165	0.801754241194302	0.845855357090729	0.740299408332943	0.822068199682367	0.786251141876137	0.800341550571824	0.806269814415831	0.795935117900456	0.85746307856933	0.774973318855291	0.812850105738542	0.784023281495824	0.819487115164926	0.822803203012271	0.808665154418986	0.875922372653404	0.760856820094026	0.817967839087441	0.77963619558681	0.831497816671443	0.829175870329849	0.829310616141293	0.862820289495969	0.793333908063859	0.804099063093914	0.747199026881094	0.809842664290138	0.82210499646659	0.826130077556662	0.868144791480415	0.757465455856483	0.821172827387627	0.788239028701683	0.803161165038373	0.803554418242113	0.823248768977042
K0035003BCN	0.85324960479665	0.901749576888651	0.851711898776631	0.744504676337768	0.836842070980233	0.836342227166653	0.838309775978435	0.800933651252834	0.882888147990195	0.830956945868479	0.707997875906836	0.826221108542124	0.825969025596187	0.838953616458631	0.869091914701779	0.890938256189734	0.847185585015751	0.721023096230647	0.814442800759343	0.834577910391697	0.835806828318948	0.815094903096578	0.880521871527479	0.830972102843734	0.729761616709048	0.818280520331602	0.82144980805267	0.833166408668615	0.825775784364904	0.872271308525284	0.856885155310647	0.715003480017024	0.845712270599451	0.845805282175297	0.838700584568948	0.812684717772036	0.861013222959562	0.866022706598634	0.694019068948527	0.808794423326993	0.814815116488606	0.819342019150913	0.750522749645188	0.878973030802711	0.825796119233315	0.712955264977655	0.817608963085925	0.822458843275807	0.813368328348814
K0035003CN	0.843989531723167	0.829703279372761	0.881651063623834	0.772274454421691	0.874010141722072	0.875096402546413	0.863937197834618	0.817586564780852	0.821466073271302	0.866089394189234	0.720972494526361	0.864170550156625	0.873008282023264	0.864658856465191	0.865540334788545	0.817941442462345	0.882940201055013	0.757936604835469	0.872207764187274	0.874803510573639	0.864780152685149	0.808330133984993	0.83744488555438	0.872248033940747	0.752030557265897	0.869858782089874	0.873642480279055	0.864064352508013	0.837860063857903	0.811498129885892	0.872206784044798	0.748211797386926	0.881190981920206	0.879435295199365	0.880679511004365	0.826685892637782	0.844951680485883	0.853389983348537	0.718945414563226	0.862196436343101	0.86519145618632	0.872942560998905	0.789543350260276	0.810706051583717	0.876324589603843	0.739335027016747	0.867532522205909	0.868508538005734	0.866807041925155
K0035003UC	0.750478408189105	0.720226294573534	0.691676458713298	0.894536483764622	0.669819640751506	0.692963512967794	0.660685100434887	0.74043605370326	0.731556031913229	0.773840254572408	0.902729245007389	0.703805359670841	0.706874519634181	0.669675174449853	0.730673967105884	0.657972147080808	0.709901296141058	0.90429802906348	0.654053708665332	0.655818494282646	0.661590658730262	0.766618547642346	0.693888549350638	0.703264168294091	0.894703614288863	0.69191067742966	0.692481281346504	0.681104725551483	0.744670094701875	0.748548080851367	0.743987096899245	0.91443313820701	0.759555962802892	0.711481451825272	0.704293127343433	0.739483192324567	0.730909171833353	0.711543523312902	0.891912871094268	0.672359921840408	0.684327769050802	0.682957010945201	0.732915742126419	0.692525878339228	0.724145210057626	0.8975890217521	0.656248053168227	0.66401073156023	0.678029985933972
K0035003VF	0.839283969527881	0.833755871686276	0.895305884449142	0.743890453440939	0.89050019302565	0.885643946909984	0.871395664876551	0.807383316124503	0.817639547691054	0.865434784818295	0.682659735393289	0.870954238400644	0.880996090322539	0.874504592055313	0.853527549553887	0.820582166076838	0.88057577073788	0.71655745056622	0.879081195302415	0.884406832754832	0.881164506596213	0.79565135875777	0.82830041166022	0.876232227407003	0.714325195357227	0.876424121921464	0.88133146982238	0.869181220326235	0.821485908675619	0.803127198943549	0.867857667543998	0.701399097119262	0.884748203684946	0.886428801646185	0.889216408681636	0.814072201461657	0.827661203109205	0.848228442026384	0.675833493672154	0.870653579595401	0.872471654132468	0.882407786326809	0.768578461156887	0.802815417214668	0.876456361223718	0.69880626990455	0.879525752050942	0.875922817275139	0.877751110008247
K0035003VI	0.822947991219273	0.820171175438487	0.896951454620956	0.702358760573601	0.900121448074336	0.88676870493352	0.875710065869564	0.800253379673658	0.805323115929633	0.860893819665788	0.639239550507842	0.869219893173374	0.87868298925297	0.87252185673695	0.84815119740296	0.813969647371468	0.883956902507723	0.681323894174122	0.884169062610297	0.89565802080854	0.886870957604366	0.776986147423333	0.82170991581334	0.87703607422735	0.676206821576035	0.884840175753723	0.878568784537202	0.876524420832427	0.806830377736238	0.790402590643612	0.851185125515403	0.668821915469445	0.87573789391825	0.884449289409811	0.884914020577895	0.809033626558042	0.820926160697952	0.841456368556922	0.633480387980486	0.881201208677854	0.874579559409107	0.88158996168188	0.762261865996278	0.793202694371798	0.871913928298251	0.661907944643405	0.884042959299971	0.885133410497389	0.87755626058741
K0035003VM	0.846405658930984	0.836024757388336	0.897703269913485	0.734885579497591	0.896403324525311	0.900506318943036	0.889080337711359	0.828452629035365	0.818034403409547	0.857145888256622	0.673119538025875	0.880652685822735	0.889433194365064	0.877784625806226	0.865566828046552	0.825346172469196	0.886510168068439	0.717837740089915	0.885380031818703	0.891445792202656	0.893272275671889	0.795901060203304	0.833210120485691	0.888364807443277	0.717732834632953	0.891479287139909	0.89379858954995	0.882045377499537	0.839387157978691	0.802227471699919	0.867003544886843	0.700403925410721	0.888101293290137	0.894327756204191	0.897465973783373	0.830487808650539	0.834352581572974	0.85677285390731	0.662325556820245	0.887562714554855	0.889826235196628	0.891485899510794	0.794979119726325	0.806666112500466	0.88175531294007	0.698580849833228	0.882251309016119	0.881708460905636	0.890175162997343
K0035006AN	0.855412081160447	0.809713907563212	0.853506823050919	0.763660320301529	0.831717246613072	0.851866218758392	0.834600457299628	0.875214454164197	0.800188348438308	0.832675515105016	0.714648094799884	0.828770711025178	0.831124101051385	0.817684914785677	0.869374799271996	0.785131360180398	0.830713538794469	0.750316829222039	0.812103486101916	0.820185622386664	0.827780128218449	0.8429958177507	0.802828061034325	0.826914307887226	0.74127113206481	0.824045917717376	0.829972713593722	0.83801741012428	0.885530826818287	0.785796402271934	0.833635085223093	0.732470390498072	0.844925182199375	0.84438564908495	0.844597416703358	0.859846537531498	0.807391784433835	0.831159702897175	0.707670479225647	0.824164459149746	0.828819818673855	0.8391173551841	0.836042360752315	0.782733208554031	0.830251579432217	0.74106321124037	0.817636426477501	0.807969863439282	0.835744192894412
K0035006BCN	0.833686933397087	0.868860223783312	0.824615417269187	0.679679987601317	0.799800978383914	0.803567801586013	0.801291781037742	0.759250104210482	0.859538338211922	0.795893304699163	0.643121998079661	0.781717678960305	0.788265504528924	0.80822597221472	0.849455343494203	0.871842111106994	0.821625092158822	0.652197558614457	0.793666996097965	0.801170683537259	0.811896510722961	0.777326040866785	0.860890805253247	0.798583187700667	0.66253816745959	0.778859130959995	0.775223907965731	0.789495546655201	0.772899682315568	0.876119479890217	0.836655541239871	0.651314822391864	0.808552708437276	0.805577976870477	0.798725499881314	0.759086609676727	0.852259159786046	0.845103330193279	0.627863715383421	0.757226066835654	0.770622969518941	0.774331662069046	0.700802044452572	0.868694571355711	0.79091867699004	0.637034958374867	0.79195115235464	0.801256650004061	0.766742363816334
K0035006CN	0.846620652279583	0.848865547090715	0.896617575809617	0.719436790171234	0.892678497944497	0.893640803269955	0.886244981098433	0.815659287765004	0.833295401543407	0.859404745734012	0.661730678361055	0.871145572059675	0.880453161953891	0.883086650852407	0.866675735611049	0.84011277841791	0.890087423719289	0.689174804679005	0.879078059983182	0.8880544012574	0.879904501459302	0.802944823994171	0.846368119041946	0.882460976236262	0.694474146284816	0.878078552781244	0.879642611347064	0.874214479655068	0.826549851643882	0.828353003461004	0.869123189468644	0.678283469029785	0.876512186778711	0.891198975204806	0.888125844872367	0.818164902103628	0.840893738944546	0.856868206364081	0.652650603403365	0.866106248914349	0.864501670184895	0.873211711794182	0.768241299803004	0.830264366092231	0.866794521445974	0.675421122832092	0.880290250451859	0.874898673785846	0.868465399065131
K0035006UC	0.728713333008605	0.69070294416597	0.669146957091574	0.897594035283858	0.64663441945324	0.665377541193315	0.637182719361413	0.725876056112387	0.706077356474653	0.762184698202787	0.912374758233898	0.685317069749559	0.681367217618685	0.647689241980261	0.708814259947486	0.624068932542759	0.68761406132712	0.90981149633785	0.631089899653889	0.633041707949744	0.628950102045536	0.748540892746817	0.668796530171131	0.681810985244698	0.898833709878162	0.670412386966289	0.669260408090219	0.664883474406598	0.733743453238659	0.719002217160373	0.722364048452787	0.917103676127997	0.742214400684481	0.684866395155952	0.680944654896526	0.733854404181006	0.704446048320279	0.684382677989754	0.90528048571514	0.652109597971576	0.668319079387016	0.661037833812933	0.72803978796841	0.669022354918784	0.692892914131666	0.895438902805933	0.626812892107498	0.636280676454753	0.655410601013777
K0035006VF	0.844424970234271	0.837659653678282	0.901299010938079	0.721604794455076	0.897507435867632	0.892510890410101	0.887537847501176	0.828011753063942	0.825304589829373	0.867408311946004	0.668063120090475	0.8824117740378	0.888375604753504	0.879585833813283	0.868268022080288	0.827470366943874	0.885697087047958	0.709210138071846	0.88329889194992	0.889878228810353	0.889345484201594	0.804306888969457	0.844404092029308	0.886622025618466	0.69999025615654	0.885354417194811	0.889103442913091	0.888383547630401	0.835382154123566	0.811870246860259	0.861983871353535	0.688521855885985	0.882781358143314	0.895462016011585	0.901810907982824	0.828275853518778	0.835597514009961	0.858851761064015	0.661002549978687	0.877058298577149	0.882155242473738	0.881430742517471	0.789024932338988	0.819871884778572	0.8738754957676	0.682119647324938	0.880765129258387	0.883232875215488	0.886245293087408
K0035006VI	0.837547698697569	0.83989420561764	0.903484270062051	0.708474891512907	0.904317040750209	0.90331161209684	0.892397697636502	0.829716203871667	0.820284458196636	0.86086027679703	0.655063062606299	0.883133857153201	0.889125355767244	0.887193560603996	0.867191721716613	0.820939742224937	0.885651139154231	0.697044073121295	0.886585950073339	0.897397033783533	0.89268479464101	0.80004379561909	0.844605716666429	0.885717545854209	0.68790032721208	0.882471677430222	0.885256117864589	0.887426733721371	0.833137830571	0.809833364230576	0.853797435793605	0.675252259469995	0.877197708527354	0.894242051656392	0.897511143935312	0.824870825943386	0.830447462069888	0.862537693875191	0.643512521537055	0.880637274149147	0.881346124996955	0.883370605496878	0.793943605445084	0.814021741249261	0.868882493875556	0.668359896917962	0.885591832990128	0.880567471916973	0.88562643860226
K0035006VM	0.840143058969087	0.840263527437516	0.895971161757535	0.711075866672227	0.902666075722275	0.900812467798562	0.892802376587381	0.827414647252152	0.818359268442644	0.857016733297156	0.655434627975105	0.880300571684335	0.884953700076417	0.887001020405123	0.870857852886403	0.827266263049434	0.884477226397981	0.691186959090114	0.882662360292355	0.892250181256999	0.889261262572966	0.804828272772393	0.834811791578887	0.877254369990221	0.685497839543052	0.886751875849152	0.889219810822497	0.886324396502082	0.838383299252849	0.800539077879202	0.851835512350931	0.672359388288222	0.87847189019723	0.886696713508216	0.892149267010116	0.829782662816862	0.821553282359309	0.859160464450363	0.639868336540486	0.881519983446751	0.878832856278231	0.884996538415497	0.78203057088116	0.811141314130356	0.863438813908006	0.674504915747657	0.877762993266936	0.882710559419366	0.889929576240465
K0035015AN	0.861578887526283	0.800288473080805	0.844538433341559	0.779747556218149	0.824732898652292	0.838438907233143	0.815243012034671	0.877279156551666	0.798208300118845	0.826583749404905	0.734845708110892	0.833093259713313	0.833297182581539	0.81151582832004	0.86244706805681	0.773056752648895	0.823642114707498	0.76500960224303	0.813381431642167	0.81933463025485	0.818523283592098	0.856037858228797	0.793563398426773	0.818024796069124	0.765965744422759	0.816462886239856	0.827465810330071	0.815471013440309	0.875115981311965	0.779397892685098	0.816675225517727	0.755764508168866	0.832070919980082	0.828945818520622	0.832577235243045	0.862639528706126	0.80847975082544	0.813360897213406	0.731156138672556	0.819501971917153	0.823983959268929	0.819812986723254	0.857389058562612	0.774268514073309	0.829153950432889	0.764628312746344	0.815551425581585	0.808412077726093	0.826635585854226
K0035015BCN	0.855731851939628	0.85239048925927	0.846320327300808	0.727204370722149	0.832944974938892	0.830192866529737	0.821688215112415	0.805031331950036	0.857356899620724	0.833873950151965	0.687110110208226	0.82256211025475	0.828862073072909	0.830546822134478	0.868242254481987	0.852813399774777	0.847335982646628	0.710424922546971	0.819308024849706	0.834165128998866	0.834395794460494	0.805727033029203	0.858676724399514	0.824636913567208	0.720255574641189	0.806591600799067	0.809769822004109	0.811409539768234	0.813150600455401	0.854883318370372	0.849409382307853	0.70954580250053	0.841462869375376	0.828277195797355	0.825587949250233	0.806220232965754	0.866476389798408	0.844936063267593	0.681007372850412	0.79615764316237	0.812054047280634	0.81796753332585	0.758090664251091	0.849608281596092	0.82509437094334	0.696689268422996	0.816783910181835	0.821219993507323	0.806652444419867
K0035015CN	0.830965736670078	0.816842428758281	0.879682940547224	0.722036811646899	0.876915770071038	0.873100018015081	0.86961567782879	0.806714468090139	0.80213895169546	0.849902094232228	0.658134821446809	0.862396543802461	0.869957202709694	0.861252100076765	0.842799228422235	0.814105820907072	0.871172665515148	0.701469303041479	0.864556388914464	0.873471231947314	0.876683010353414	0.783211546340244	0.819464345172932	0.860136102565342	0.699686369851344	0.859807112848874	0.863139655600713	0.852235975509272	0.809115703084066	0.793116530073337	0.854433390257829	0.690163352332236	0.864360974181224	0.874825317596797	0.874720102548021	0.807560295073191	0.825363533997639	0.839278298777807	0.663751742907153	0.86368783696935	0.862647373784307	0.869601786192273	0.7610818108571	0.795917782605071	0.869175639382203	0.688131969970252	0.864482770211252	0.869768567172089	0.865503981325712
K0035015UC	0.729728020724355	0.684855302200764	0.678432155312868	0.894961800591857	0.656455692104405	0.674725633596215	0.649700401596192	0.732874522483637	0.69495778083292	0.753570473799458	0.887581049080738	0.684296126748654	0.688080469068587	0.647753238968284	0.7124887604988	0.612560168159297	0.684266691504566	0.893836351038273	0.635938137260696	0.640904581174766	0.631666219460859	0.75210411204754	0.659776635461157	0.682857815892065	0.882852427149415	0.674593396492062	0.680352755678657	0.661431838003811	0.740369444137052	0.699278231331341	0.722063689435242	0.90165315157965	0.740063444568578	0.68541161086143	0.684432629689998	0.73796445584155	0.693880175314862	0.676392215093578	0.891356862545151	0.665730606174864	0.672938068419661	0.668901727177573	0.735925652800893	0.657635577702643	0.705121957055378	0.898014938655089	0.64307148641421	0.64187563541964	0.674914113476672
K0035015VF	0.818594529401427	0.812134861094647	0.87896421507583	0.698395752311036	0.883478489888642	0.88263059962944	0.867861781333361	0.804720276449977	0.80336998804924	0.839685421388193	0.633771266293581	0.858347766835828	0.871132055204703	0.859630360341424	0.843643560165857	0.806008676515929	0.871176322198941	0.678548006489857	0.871853441027697	0.87741702877022	0.873063022412893	0.776086600881604	0.81431184805127	0.864152620594872	0.676461259566126	0.869020719064963	0.86753939717215	0.861240469349786	0.809402272904748	0.776472145980508	0.837479753019686	0.660671139062305	0.861526186149551	0.865464666071591	0.876386209102845	0.805770054452039	0.814323447300049	0.832583108296081	0.639258011192139	0.865192064153085	0.866167475003609	0.875903654563604	0.767522586116892	0.782531873194911	0.860278477161714	0.658882231224028	0.870646888554693	0.86385922510743	0.864757475027995
K0035015VI	0.819795517151785	0.801082461246478	0.878274619094032	0.702909628281068	0.877581641586238	0.878065850614259	0.863699207084831	0.807134123130594	0.794411760967525	0.842517601607798	0.638052238018182	0.860005201846764	0.865328051551144	0.854790040284383	0.839177415771656	0.794781351381988	0.862563588005862	0.688588347369023	0.86778404683901	0.86753847926367	0.871760933898313	0.777467872850068	0.813138639448301	0.862064054783553	0.685183429291028	0.853638904955381	0.859519239773064	0.863658834724411	0.816548666411135	0.770547895011145	0.840883444790362	0.666087133642148	0.852755684982214	0.872711213978725	0.868849073787109	0.804540225723085	0.8048668875066	0.832470223021269	0.646622902908728	0.872043028757261	0.865131711526846	0.868962999338797	0.769895305097515	0.778589241282033	0.860369629345067	0.668041859547039	0.865291147832938	0.8621000516473	0.867556757163383
K0035015VM	0.827597808243542	0.821203011460759	0.881070398014465	0.687054577762669	0.881833366766381	0.88465541064372	0.86981536304077	0.799352920550585	0.809007054894678	0.838985392627652	0.616982978348284	0.854998037933773	0.866624762224477	0.860197769732386	0.847280740417101	0.826710516731548	0.870710445475348	0.664352662690296	0.869283500548548	0.881975771952133	0.882818949735947	0.774861197012881	0.83247065109829	0.870579123041006	0.658713167529889	0.861565624898019	0.864193169369146	0.857484647393003	0.80747073404678	0.789800528956166	0.848358129252608	0.646101046181632	0.862229593154578	0.87472550457298	0.877589189250491	0.809436347762729	0.820097133525966	0.841239346617877	0.615749714532978	0.864391334147011	0.864628657123538	0.870301207204231	0.760906344068719	0.798450956010251	0.861121684657945	0.650703655214502	0.870229364826547	0.871406613160638	0.867397000972855
K0035567AN	0.818100899066213	0.757645155998519	0.825181561693832	0.741019950627586	0.810191974294283	0.823331764355011	0.799144357912801	0.868472236554182	0.756827283738239	0.810507020618936	0.695331227460211	0.827489751845079	0.812972938819839	0.801467444927785	0.836375121832325	0.718799970863226	0.809288048702462	0.737149385042235	0.794545686790165	0.804609454757246	0.794536628662521	0.832664784551638	0.753778448498052	0.79339098063294	0.725213662036482	0.801336913521506	0.811671991934967	0.804299096950889	0.869618416185649	0.723423418087832	0.79665332133333	0.72520216282568	0.808528803884252	0.813036517295911	0.815486964051628	0.855010316755387	0.767691991166329	0.790612931309358	0.689364960618318	0.818648564209492	0.818585102002973	0.812091051540967	0.876632735463631	0.736444918138554	0.804841296120484	0.736435720232141	0.798077224002406	0.797225199365725	0.817914515362892
K0035567BCN	0.86169017036413	0.885648837455849	0.851085728322757	0.737587955825329	0.835860762878221	0.845389261235104	0.839723042031377	0.811566669994976	0.861529102829235	0.830475223270439	0.694754471879646	0.830343097696109	0.830573301994353	0.831837808406974	0.873907435771126	0.876770072962021	0.845807218022971	0.718747696669493	0.826058316318637	0.834759540771208	0.838967422054776	0.810749031533696	0.875821209741811	0.834371940904976	0.721069811457613	0.824022022728451	0.826453070218975	0.834116978248845	0.833642462595374	0.863028629167856	0.854311403722753	0.702776379412256	0.852607278358017	0.845788100076311	0.846910659471435	0.812174098962187	0.854715746576681	0.857724373698727	0.683713436312606	0.819570342498711	0.818675963776941	0.823328055374065	0.753321542549767	0.856773329546413	0.82019581189437	0.701221024307015	0.822221208038471	0.830633346624873	0.818969413267421
K0035567CN	0.83945279840606	0.844189596297605	0.866793691768674	0.760452712088985	0.850378340328008	0.858426701930432	0.85602928348069	0.794221191360848	0.824425212993351	0.857921456980193	0.706598283756068	0.837500961601548	0.848351940070553	0.849133195023467	0.851073132381446	0.834696931788795	0.86625120519799	0.747741160640215	0.847212624897587	0.853134233080427	0.858152346217355	0.803203694657141	0.842954335040233	0.863304661503138	0.733603121649687	0.848725661944656	0.845895361372612	0.850278943524981	0.82056065669673	0.829899270589999	0.864207213044838	0.731881260538172	0.863672286920252	0.859766674344216	0.858431396863318	0.807206250750969	0.838871701396161	0.86072268678233	0.702740157645259	0.837007221617213	0.841307944656522	0.853623923957698	0.770864895943823	0.815829441344201	0.850702536747579	0.728367593580566	0.835334544723333	0.841756543767119	0.845721539045722
K0035567UC	0.733073660821188	0.700640826747111	0.677113367361663	0.899974355253578	0.656888896173538	0.677386052049638	0.654440738223233	0.733964577951426	0.711672758069999	0.772571898469524	0.909986426542591	0.695371488754311	0.697840668792623	0.659879325191968	0.715716189187248	0.634914624617477	0.689090084874557	0.91511221476388	0.639540120073554	0.640795364327434	0.636942980572923	0.755508366517185	0.678203218080836	0.697298666218334	0.899387279969794	0.684647297655205	0.684886413245546	0.681366229119943	0.741665520775897	0.720411968430558	0.735162173779493	0.912790707860915	0.753777910088125	0.699240535076317	0.694122195910981	0.741192330320497	0.718748816832882	0.69959423668467	0.899259570308154	0.667106551592005	0.679346386164135	0.674641018243573	0.739256426935545	0.671079807301961	0.70513925172732	0.897479237115261	0.63608218193354	0.646055646246683	0.669820637807062
K0035567VF	0.820980930441352	0.815709822753581	0.893011907927618	0.692728459915021	0.88433218324329	0.880788672341669	0.878622565535047	0.796653470220363	0.798368759046003	0.845480756144226	0.626204270592731	0.868428111783403	0.874874860974932	0.864328179910135	0.847093957762003	0.811482854214664	0.881239497936692	0.671486117187927	0.879268615315777	0.888681640605616	0.88680479732065	0.777467720682421	0.815618350044147	0.873466846718669	0.669161452859796	0.873408760101683	0.879155897370323	0.876622335338328	0.815605442125036	0.77708313107837	0.856424960939886	0.64977743521328	0.865875929825214	0.887880425562632	0.887448356085455	0.803531192991527	0.81621505466429	0.839624012752917	0.625235750372745	0.883955191693256	0.874431063557269	0.885921649098556	0.767343326981449	0.794281202537715	0.869998175645639	0.654031751921025	0.881700623817866	0.872497217611377	0.876366776534207
K0035567VI	0.831134004350355	0.817356594210921	0.881754332588477	0.71169774712003	0.874475837903332	0.868458240523233	0.862761628626066	0.789746121486921	0.809609329320874	0.848688252570376	0.645818279270786	0.861250789049475	0.867309420266899	0.865747675994715	0.850518624493611	0.81909261179925	0.883051906652997	0.685932789307913	0.878097064241349	0.880728107933698	0.888792184857942	0.778966937554234	0.827796776919096	0.862749751846702	0.685835554239056	0.856524087446663	0.86883695833482	0.8578604920018	0.813333315367839	0.798809233254132	0.861282091227247	0.674042677538422	0.866390058085088	0.873200024234393	0.875263381170687	0.799445099447912	0.824560488263014	0.846333502572075	0.649697435408535	0.862939985880578	0.871827720847804	0.873429206907049	0.748518681659264	0.803074726920576	0.875869097984814	0.670047110618065	0.867341371416016	0.871240184976243	0.863414455941356
K0035567VM	0.833348222169457	0.833664909088034	0.887916522745129	0.692684421027671	0.889176036802741	0.890066005188684	0.889619132602534	0.794320125012236	0.808983428885418	0.84419320145104	0.623417462551833	0.851494362800988	0.866243697600657	0.868364849529936	0.852815151150855	0.83130381040629	0.876829536812547	0.667442444186405	0.880867175573655	0.888660901390206	0.886320126037015	0.785232334805454	0.835927541933445	0.877462936986502	0.6651159532281	0.874049633332651	0.867560356307455	0.875301020640305	0.811808995887955	0.800807680451074	0.861001500630957	0.650153590483627	0.872662755359085	0.884815829309881	0.886352009789278	0.798354308274939	0.824985080170263	0.854311335740408	0.618391814881328	0.867467798008267	0.870849775084665	0.875150577090413	0.76231748260394	0.8059180346582	0.86558848877705	0.65058152035423	0.876902373365089	0.874018439500091	0.872587346701796
K0035729AN	0.821245348429688	0.75662100018358	0.807723338574617	0.775240254339052	0.795143198085618	0.814746586499534	0.790345516323598	0.866531229516487	0.750925268518972	0.817220300797298	0.733024783386222	0.803124978296057	0.800680435993498	0.772805043574436	0.836451761999913	0.703039743020029	0.791116922012559	0.766100353499549	0.763314828618875	0.769828861274069	0.767720477316714	0.844754799395903	0.7493931792085	0.787174791511926	0.758101517306831	0.78728212430617	0.803207575048372	0.793224738338997	0.866554934615141	0.736589961044779	0.780379366293445	0.754218779966799	0.804072285928167	0.803164165237833	0.806454166386118	0.860901631147465	0.762303003670414	0.775663118530377	0.71673151071661	0.788191089384003	0.794114741721008	0.790535994194545	0.888060884946269	0.729194398065969	0.781508754018541	0.759488045509804	0.773573522020748	0.762650268168186	0.800304952032742
K0035729BCN	0.852852785296783	0.892326916663643	0.838766461062272	0.754596528416854	0.836515320102493	0.840836455278653	0.834870837370881	0.812828004533793	0.868041726782489	0.833737007388985	0.718606946443104	0.821351197276218	0.818471834375692	0.82709996711041	0.864699109217274	0.875086722623342	0.833441925291111	0.735951617527749	0.807689344559746	0.821197403080171	0.819031889996765	0.82024742302211	0.867660500125212	0.829439182431636	0.74182491847883	0.829165078901726	0.822078043015285	0.833145789840875	0.830263495242104	0.866226834397127	0.842737843818384	0.717467534522385	0.851614201529185	0.837949625934975	0.838670093221172	0.809218691372048	0.852123686504917	0.856114541579512	0.699793674869593	0.800591493929246	0.810070818702772	0.814268040812421	0.751148111991143	0.864540201695484	0.814533616263051	0.711917974350545	0.805810779750239	0.821743045562062	0.813805802740617
K0035729CN	0.842442040558268	0.852640727709421	0.869586835172675	0.761262509338196	0.866392487256225	0.876026472363096	0.863321497913305	0.816296418118401	0.841761631040733	0.861906542721729	0.714091860843895	0.850714216977338	0.856582251225108	0.854784885498815	0.869289312001971	0.836226067185234	0.874763562062396	0.746718725230189	0.850010274743034	0.86098998520022	0.850644047054228	0.827888704464621	0.844571457720295	0.867876727264649	0.747184009649946	0.859761019581014	0.857084554803387	0.865924482618621	0.832073613710108	0.837579444524617	0.871452626100042	0.73096611190774	0.868547307862805	0.872395620828334	0.869997558146893	0.821543645874414	0.84076129001899	0.8534361922136	0.707018892032823	0.833548672038502	0.847438332019018	0.853772070214959	0.776158633160271	0.833640053198237	0.849342535946874	0.727533118711894	0.844261130444387	0.845781636388239	0.851643326757366
K0035729UC	0.732686222480425	0.713337764918529	0.672568400725674	0.893027799449931	0.654545811215425	0.675324007322458	0.641888566029499	0.716979918160977	0.722446728088636	0.763257381784473	0.913422484525792	0.680751538245391	0.681736140336214	0.647267795713797	0.718109445407792	0.642971400954678	0.682574671351015	0.897445258413846	0.627248220187694	0.636752367441849	0.627828046652921	0.752057380403542	0.682956328573526	0.690268164320903	0.891147272936411	0.678949155944169	0.676725239950464	0.673679308526006	0.73033639119995	0.742952507529826	0.727207936347147	0.900591837123217	0.742571251758944	0.690855970676971	0.686294429849161	0.722820123193115	0.72023237536645	0.687562740779374	0.887906477123906	0.650145046228148	0.659029335099581	0.658989649320778	0.70425497269213	0.692642056535112	0.695468286127249	0.887662553747129	0.634054607424301	0.640305695740199	0.657928045778679
K0035729VF	0.840167299239413	0.861349294351451	0.860875430944764	0.700176604634284	0.853736698551045	0.855098038745234	0.84882631431198	0.786340439706029	0.849259465933419	0.840504034827688	0.659356421434031	0.832270156424616	0.838421162755437	0.842729957824023	0.850924448656819	0.845277662463812	0.855004387901937	0.674661307412044	0.835125502717334	0.850737031485292	0.840296314527636	0.810344786058336	0.860283275698421	0.851247151187059	0.68578810898215	0.840569431491374	0.829350259054659	0.841029631525617	0.796647696512391	0.855420847718219	0.857258070360182	0.668196864931411	0.855760994180827	0.855345299113423	0.851931534357738	0.792424509050529	0.853500816605204	0.843438495190974	0.644968383558629	0.809176670836582	0.816470504155188	0.824534156844795	0.737118161794166	0.852965222065237	0.827155247426127	0.664722916143274	0.838859869928078	0.842424506006802	0.817665605849554
K0035729VI	0.836772328979256	0.845519233870412	0.890007617190552	0.717425681338487	0.889465498047803	0.894546390401251	0.88400675641384	0.817919441736917	0.823642147563053	0.85075676236495	0.663359686995085	0.870677113076996	0.863607654054955	0.861872991202495	0.866386643026093	0.817298657929442	0.872383046421837	0.70321798915713	0.85988453999721	0.875452646046746	0.868102990767532	0.822834743767907	0.839034915562014	0.868497714351938	0.697282430018413	0.874946374644981	0.875895317452636	0.887333765619922	0.835617384792567	0.815121931597318	0.854321759665067	0.687505473502834	0.866457235520206	0.87899953361511	0.882766017408304	0.823171004635304	0.825761157294378	0.848916525663257	0.648169164290175	0.863437488196878	0.865377764415961	0.860353670851168	0.786017805395887	0.825167109158109	0.850810877501469	0.685791164225285	0.860574333484883	0.861296544489924	0.867671261512801
K0035729VM	0.851290520547255	0.844410322018218	0.87094608794871	0.753285741578168	0.871221760312108	0.872782289469901	0.86662576210593	0.840828942973724	0.828960816247018	0.850721300322242	0.70140473497708	0.861980894065137	0.856410725808186	0.861811008992411	0.865342069520284	0.815956818349441	0.863740850801433	0.737854261535422	0.843319232355595	0.854993401315139	0.852824993842571	0.825195769174607	0.842546036783486	0.862046084138916	0.728345882143543	0.861968428293123	0.862307423584188	0.870188577306417	0.850345046887439	0.81510247678581	0.847559633108072	0.722146037063152	0.864097268339986	0.86250342194083	0.870324239575474	0.845186306492707	0.829543106952117	0.861289490426042	0.692053999601754	0.847073363850436	0.850480737994494	0.851210577502769	0.805723612434746	0.824332225814119	0.836136245670024	0.719546003526936	0.835550413754875	0.843123772485368	0.860962428455981
K0036067AN	0.829455940864909	0.781534111549177	0.79866183244717	0.81262900278639	0.774636524147124	0.793251950110594	0.771036992061486	0.844060661601964	0.78347356791096	0.824346083010436	0.778259356534634	0.785288458963862	0.785664624739539	0.770892798673224	0.833651093828505	0.728699401197552	0.784100687750894	0.798623738607013	0.74833359297459	0.75464035824264	0.761701589950378	0.858157376662933	0.770558123859293	0.786365421186765	0.799785884420038	0.785085870792477	0.793005376570329	0.790202087689441	0.849094213630389	0.770284190443015	0.798643735819231	0.796050471529506	0.813464506458996	0.804401165708104	0.799172663990466	0.841504495975717	0.772884169126523	0.784191721983208	0.764897341262242	0.765504411018045	0.774492357717305	0.764445569889967	0.846865721894282	0.761037577013171	0.782520652043104	0.799683404369067	0.757411255474685	0.756822702741287	0.782564702300317
K0036067BCN	0.855901621446376	0.880903322485734	0.842855033664985	0.732551719421341	0.826797395790295	0.835030950510171	0.823758967930203	0.805905909971615	0.865935188358545	0.820979147973522	0.696666585547562	0.822962242721509	0.820313758413717	0.835556045276123	0.865211138091771	0.869073915285775	0.828915494440823	0.709382595179112	0.809638116365024	0.815205073042601	0.829193460901606	0.821226596460572	0.88544212246401	0.823501688939823	0.728783297215353	0.813576636038793	0.804310793317323	0.821314691033501	0.816248436393118	0.871222294273937	0.843974379521299	0.705961033030663	0.831531293322097	0.823706197680288	0.826604767506008	0.804729962402673	0.866908006312281	0.86393578568769	0.679682340490703	0.796759871331129	0.80189339668411	0.808177310315081	0.752801683378585	0.87310274093834	0.817297466927052	0.698771371766265	0.816479387286646	0.815833509712635	0.804591257810886
K0036067CN	0.841335874231332	0.844602976164082	0.868006223713718	0.716763749271517	0.852085686667322	0.854678350858356	0.843312981672116	0.798003769034549	0.841144348801806	0.849329037624584	0.674347053690626	0.839725650333944	0.851438390573588	0.856054195373312	0.857538677462099	0.844408172447902	0.865909425150308	0.692490415651095	0.854158710143214	0.859905339718735	0.857956082577089	0.807767778577228	0.859171760521043	0.860489974277737	0.697880517074619	0.842028492854306	0.84406895290499	0.847935355060008	0.808536560756402	0.846476226676213	0.857944821424195	0.690752326351628	0.85927292808722	0.863105979051438	0.851433587038961	0.803353288374381	0.849964513010536	0.855476605542031	0.662100360708252	0.831394328121326	0.838743080863995	0.847740611414044	0.758180303711817	0.83473672991876	0.853631691449854	0.687927052366039	0.850167303095584	0.850546602144732	0.831383846726463
K0036067UC	0.717477295704543	0.689844113408387	0.660157291592025	0.896786466310163	0.630940608515997	0.657083706745492	0.628158108379481	0.707934639013646	0.706019563469841	0.757545733178665	0.916179736944035	0.677528337679832	0.66922819637302	0.637620486108335	0.699813233666646	0.624986994640674	0.675705377927093	0.907582184993437	0.61944415246518	0.628535300786682	0.614703407451052	0.74673378354675	0.663640401443649	0.679153324410367	0.895130626569179	0.666959518067536	0.667449335183153	0.657734219008273	0.715466715067893	0.728674951253251	0.72099649515549	0.912550681181128	0.735822980465807	0.679389498568589	0.674651263280771	0.723019355100003	0.704161649500212	0.674151222364945	0.897721514384684	0.639838428665905	0.654183139953516	0.647971432779124	0.715165301766271	0.672525041651809	0.684159543255767	0.897893430965125	0.616145178468365	0.627546622888469	0.650818219333104
K0036067VF	0.845783263738515	0.843012546581195	0.899209726385058	0.702499168223297	0.895661476712254	0.892878109117404	0.888686417010495	0.815694994088566	0.821682434907314	0.861635648045601	0.6451337985185	0.877613249791741	0.882504715642191	0.883120631029574	0.861344152139038	0.836043464140998	0.881854434823997	0.677312988582691	0.890386231967726	0.894978664482357	0.888139315114616	0.804319755482109	0.841185767523671	0.882973373310055	0.679882676192378	0.885448502109994	0.884456316098109	0.881661845351124	0.828582208505819	0.810342226538503	0.863848435490197	0.664802926557247	0.875633693237647	0.895170013403901	0.893713237988216	0.820841669690163	0.8274363365932	0.855338983316458	0.636435472352273	0.880310540549594	0.877563316585748	0.885987239164704	0.777696892279844	0.81573957900093	0.86758885037868	0.670279661771801	0.885084102873328	0.88399054273865	0.88042144134188
K0036067VI	0.834607817075008	0.839668053799116	0.888492082056732	0.692175617525052	0.879510818197622	0.881685966009382	0.871279214930708	0.808551986274985	0.827281516523258	0.84509738811759	0.637803559474156	0.872531097883562	0.872542009489356	0.873467409144182	0.864097327423461	0.841721080534131	0.883633991332009	0.670097490100443	0.87909231038764	0.886603753167811	0.877478761685967	0.797457325678647	0.842776039335976	0.869247670935526	0.667897686570784	0.865145587768916	0.869571778256433	0.870412838366961	0.826693653599943	0.801768934669669	0.865271280640003	0.655366994955489	0.871889572208767	0.876724812099701	0.884529294592016	0.811694863979455	0.8281287264008	0.842562332366163	0.62733394601257	0.860373831731882	0.862492809659192	0.868274807514264	0.764452299868443	0.819374285271348	0.867763797537131	0.659184801544026	0.874915461894493	0.872867239212476	0.868972489544487
K0036067VM	0.838018118321923	0.838291271528299	0.890141346813149	0.688801585113184	0.890122983923793	0.889774505404761	0.882213572703629	0.811304327632885	0.829184510026464	0.851759084299588	0.62779945738557	0.871351023759692	0.879627297634828	0.884772270533241	0.859772088620992	0.837327191486291	0.878705924156814	0.667497420344063	0.883734623700472	0.893507239990643	0.89063538515631	0.787838845709412	0.835839448547561	0.882512077581737	0.668581456723896	0.880034161582729	0.880411495602656	0.886509313600895	0.817055605640749	0.801709862415255	0.863405256947946	0.656771577144171	0.868028644894487	0.89159652539481	0.887683993846468	0.815473345586004	0.825418492524776	0.850874874533463	0.625572380623521	0.872624796966714	0.879393872672464	0.879216278733531	0.763008521527866	0.814149235992705	0.872984402487051	0.654148212481384	0.880334294617626	0.880373155265126	0.877561143059895
K0036081AN	0.837019662940696	0.782824425496974	0.818648108325759	0.778815461469203	0.807485146943924	0.822199360549502	0.787280270079382	0.888653997893296	0.773911771925613	0.821865476327017	0.740898086150688	0.818730138164361	0.811670742163916	0.790003686987649	0.847479122714236	0.727719184082322	0.798493580173119	0.768200346230781	0.78051610045964	0.787163660670625	0.77845103338297	0.860074688288259	0.772274400726339	0.800646593506371	0.758609002237525	0.805544796182833	0.812217561242986	0.807739117802136	0.883114836881668	0.749429319899006	0.797923183613345	0.761413998871408	0.814292342836672	0.812478348998754	0.819208000580575	0.877693081987259	0.772203581879592	0.792935708467677	0.729446488189399	0.800994841790592	0.802513381873201	0.808703562958196	0.869781568813526	0.7429896497727	0.800673735482967	0.771252519973136	0.785380656317763	0.779640171164353	0.812464566798667
K0036081BCN	0.855601064777749	0.882301017421995	0.853148361398104	0.747105071008704	0.838222961634394	0.847088172955989	0.830613708226175	0.820116183167014	0.856804908577195	0.829789619506392	0.697768314518866	0.825704423898082	0.830458934767362	0.835795973028829	0.864445172773159	0.859132084029483	0.839616188483502	0.723908204250734	0.814382297222866	0.826039007097674	0.834976566740162	0.814142850047679	0.871747981374811	0.833759404669587	0.723822911655304	0.823316625825282	0.821904596693605	0.83207822409934	0.835697062394198	0.856438080204205	0.839908016954328	0.711332115456176	0.84062182431998	0.841080537226788	0.839252634798182	0.827743325598782	0.852779253790939	0.859713946742863	0.687634153419839	0.803357517970675	0.816135057221793	0.819510143362098	0.772443990708365	0.854010246894325	0.816165741001328	0.712745367377999	0.813781636960544	0.829075135056321	0.825152673349297
K0036081CN	0.841047633239363	0.813683870985233	0.879243218598581	0.764310618542089	0.877804663162498	0.877140614614443	0.87025575016356	0.823738058282493	0.803485258046717	0.862774051118889	0.705852811009527	0.866983410545415	0.869286108554325	0.860158801485587	0.850045753583447	0.797526797120648	0.868461728172033	0.745420847989322	0.867062582886863	0.869378067820521	0.863102480154425	0.807852346803433	0.820262680169536	0.870859860313208	0.746030842436147	0.868918411896438	0.883128206073532	0.864590924382702	0.834989987041976	0.795122907347215	0.867747126759215	0.731658320852782	0.879118805093535	0.876919791149861	0.885865892004765	0.829716827188428	0.825724916901711	0.852509752252902	0.712151097889941	0.867646230162062	0.875497585763561	0.872127044872371	0.794685911799769	0.791674658419111	0.864429579005279	0.731950005529285	0.860029943532292	0.86553572897027	0.865528189703166
K0036081UC	0.769857081370687	0.746082422036081	0.716598635988258	0.895469983492855	0.698873148856684	0.717182744015954	0.684639167937054	0.747913315210547	0.752662485464969	0.791106150043189	0.896928024765963	0.727439711918452	0.727299115481871	0.693510468042544	0.750309822192741	0.692461671527664	0.728582255835282	0.895378295048057	0.67874236432272	0.685196665689355	0.675101170719602	0.776524367850831	0.720752990399144	0.732058370763504	0.890000707804608	0.718998973790932	0.71634328987135	0.706519430808034	0.753524384219936	0.766935015275484	0.763270847966544	0.903975759521656	0.781234743002728	0.731797916261872	0.728145692188591	0.748093036640197	0.758219661755563	0.729185720875628	0.887815161371662	0.699910723659486	0.703844697503934	0.704396868548623	0.739212114306083	0.728809902365813	0.736135135208086	0.883506774739777	0.678762953369838	0.688320909225387	0.695387784641904
K0036081VF	0.835960265193192	0.816106037195856	0.894598069309093	0.712889894238258	0.892888927255852	0.887436237623473	0.886233271262108	0.825086252811293	0.799813527439107	0.845441029169116	0.647861919358169	0.87767409717945	0.878058224055637	0.864432941444834	0.851757984003518	0.796816684618251	0.874262131956074	0.697084686449235	0.876670695874529	0.884912028603294	0.876783176562817	0.79174321824616	0.816849102671198	0.875232243150754	0.691429479491109	0.874072713409168	0.882326984783433	0.878417165642456	0.831389100028733	0.782291517591268	0.851625844570921	0.680630539622803	0.87504986054009	0.884897849490216	0.896703805277507	0.828308586380469	0.811082839486391	0.845634304835587	0.646864681657676	0.883143576794574	0.887735910614678	0.888563887748271	0.796629985802164	0.787311755149421	0.87461259194671	0.682948227029807	0.879314565226977	0.864445284494719	0.874987843538558
K0036081VI	0.825113607859524	0.8108724861309	0.889277664835335	0.717215522508823	0.892650706140241	0.88907724738386	0.885120189284463	0.81178889412452	0.804022984718799	0.8532353993515	0.660517659980297	0.875649941161476	0.876093928934546	0.883423902392777	0.853328411217683	0.799703805140429	0.874993817259556	0.70360161879989	0.873358627971534	0.883229155633244	0.874933812532772	0.785634529717035	0.816221688581705	0.87530752549446	0.69413044849482	0.881941609451823	0.886826862135582	0.879099956373159	0.817952840627878	0.783220079408496	0.853077644189394	0.681302596436204	0.872923229839885	0.883455097818471	0.885410168325868	0.820565053941987	0.817182873236499	0.840415418674154	0.654597091380801	0.885775793545088	0.88249514622553	0.885011281556222	0.785978421141004	0.787062760951593	0.873620788991291	0.686140844164707	0.882889686659049	0.873330399962588	0.87526582892498
K0036081VM	0.834067835246801	0.819224858185521	0.891759877051801	0.717319597826981	0.890089775186618	0.891388041827863	0.888953399788949	0.821329813079034	0.80656899453227	0.847240958392935	0.653325141749696	0.873299460254505	0.873638781492606	0.872153650215291	0.855981549402804	0.807214764577127	0.869730864976275	0.6997083351929	0.877859106742581	0.889079701541297	0.881737367037435	0.796855326104994	0.825928825601217	0.889093322590052	0.69735296119005	0.882508094828681	0.879519602144652	0.878537508139944	0.833359142471903	0.785836174662859	0.85754450182554	0.680398866985629	0.872233723980515	0.88840998057239	0.894714134182135	0.824593892352856	0.812451571391782	0.846141110439913	0.6525021814658	0.874870165538781	0.884856392498615	0.886930763085569	0.786134343067441	0.793111114621752	0.872494648063842	0.683122293676706	0.877297665008912	0.881510390905388	0.881565366791495
K0036099AN	0.856484260068357	0.820141731290701	0.847316743901574	0.781370510443061	0.820867396481815	0.837806828961694	0.814216711723876	0.860347372858315	0.811799165611999	0.836909889665679	0.734121244274752	0.826080555574991	0.818492473105147	0.80860624360367	0.870334267428595	0.78637038017182	0.827889485422901	0.760860478286065	0.800940530100052	0.817024235559649	0.815686901222812	0.862987459339026	0.811492846355544	0.823104969132611	0.753820908255425	0.825281676270092	0.828245634067728	0.831987481310999	0.882545306403113	0.798587759126093	0.829069380244256	0.753683058911189	0.842895718379758	0.83716150214436	0.835157300409657	0.871763678391516	0.804837603218884	0.823648586933909	0.722851782141101	0.811911817928696	0.815438514780121	0.816626444689244	0.847554563626263	0.78357616654905	0.829863501114865	0.760474798202524	0.807352918528555	0.809842078622763	0.827397266962912
K0036099BCN	0.843148333722849	0.879271881667472	0.830339159950764	0.726142926912849	0.809068006522178	0.815272778202783	0.805167070391004	0.784312292710501	0.862618643227672	0.817688810414518	0.693326834055264	0.806776116330303	0.811577371883396	0.817207356985413	0.858144995528734	0.874764309345663	0.833562059244068	0.705210895102097	0.805670106292963	0.816913750475168	0.81903166130003	0.800837391359615	0.86083089465962	0.809597683283188	0.714149496149868	0.796431248487376	0.792709777745117	0.802136279226702	0.809554634727898	0.865648018427743	0.85581589773738	0.703232781388426	0.834132275728204	0.815413049135057	0.813707242256894	0.796028065844031	0.851645589587042	0.842194410104113	0.684404896932558	0.784493778466959	0.787377561784159	0.793245177857914	0.734170332284022	0.850575049494252	0.801867449969347	0.696696572847406	0.798610795540148	0.80628165460101	0.788638727006793
K0036099CN	0.849092874848937	0.830236580813884	0.885059406178944	0.763498582181166	0.870750804657665	0.87265499210564	0.864413594515846	0.815200109976522	0.822092718104262	0.860060984357796	0.705173168720493	0.868267670408918	0.874442953505224	0.86168463974498	0.857085176097016	0.812970072019492	0.87107944412092	0.739019213497249	0.862706923098629	0.863304436275352	0.871060795846442	0.79470244610836	0.822864238043421	0.865982058796033	0.736864805095665	0.866974619509916	0.869982067437924	0.854645827459532	0.830955434108993	0.802956829078074	0.871930838598845	0.735111860925417	0.880459157286007	0.878849642575153	0.872659320211911	0.81924829239715	0.8280449628628	0.855656434829969	0.697383396895661	0.862584407109568	0.864688964418652	0.867131797628813	0.78220214257202	0.800794792647006	0.865998588378836	0.721843128236212	0.860984529521707	0.86573653110522	0.865246701095642
K0036099UC	0.770240790671452	0.742416311028448	0.706017056700928	0.876252653807444	0.682776980360104	0.702643407420468	0.67595563872352	0.731422299634764	0.753246369970392	0.772969235853014	0.880788963447057	0.702052990939766	0.711906795429458	0.685112865749138	0.740795478585635	0.694926800175425	0.718746752571979	0.878409399677886	0.663624758773441	0.67233529644839	0.66466392187912	0.773381496306562	0.722069928538255	0.706460949984237	0.882091290614292	0.702690763989361	0.69747290078431	0.687964543291856	0.747310479801238	0.766884800598923	0.754837533352486	0.887237272095605	0.765903419821341	0.717029006996234	0.711629186384665	0.744658426439357	0.746762012049841	0.728727739029653	0.870006454275507	0.677756627075114	0.686746952497771	0.680384110914913	0.721533272378499	0.724988870413127	0.723461286584645	0.863184349757966	0.659426565395854	0.671340893585995	0.677642433219443
K0036099VF	0.826244619543779	0.802781771200211	0.878319643649989	0.738484791818096	0.888965811712136	0.890106252641241	0.869416225793924	0.818208704231377	0.791700279568772	0.847395896701478	0.674569546003521	0.872100741116369	0.877265099533355	0.86069819295486	0.843578531528999	0.787472844751599	0.865310676083432	0.716446153208668	0.870259127286192	0.874179172912107	0.868178441032041	0.797503348395186	0.805347872289152	0.869117878777487	0.711511058952335	0.874879004607758	0.878144046366104	0.869425138114295	0.832137114328375	0.764907565243577	0.85158524642144	0.70001642932748	0.866699781012409	0.882353215472189	0.886248593791904	0.828131651505291	0.797802437019009	0.830802346201089	0.669477178267055	0.881420007139363	0.870497502174597	0.881047828189829	0.802427959155695	0.775017183013872	0.86591858831174	0.702157653071255	0.87595705730909	0.863124355947014	0.878718537095547
K0036099VI	0.826374287607666	0.813744469672262	0.886486608969948	0.727668178145728	0.885750449110007	0.890767625070833	0.872468595037383	0.818108759197142	0.808121755773639	0.848626852711024	0.671647290368475	0.871108280482435	0.880264739089268	0.872727494111371	0.857585856513999	0.800362505580703	0.873267694436097	0.711428992698662	0.871441607230268	0.886760945007319	0.874711711041427	0.795402234019979	0.824798540283821	0.870504434400114	0.709923583812575	0.874936384142541	0.879657506539567	0.866386581860883	0.837795653233009	0.783647922127522	0.852578647256732	0.696490212390758	0.876259865170066	0.883646815923729	0.888313369470898	0.834132800569794	0.812118967045175	0.846500405647235	0.665042434473215	0.875040301777128	0.874540750190052	0.881859230102927	0.804435371099013	0.789957903273657	0.869918500548737	0.69648954082883	0.872973051766756	0.867378711026586	0.876064900119301
K0036099VM	0.828014066606874	0.823248431161931	0.879748800691877	0.7083877399825	0.883859179601754	0.884908043645391	0.872683628274628	0.810937739581338	0.802711345163238	0.844796437824572	0.652108446361636	0.867040543709336	0.873129168156934	0.86731964729173	0.856705409656858	0.810450720170899	0.871938413142061	0.693151516506033	0.873989489173424	0.87739391131382	0.870534954434042	0.786985270331984	0.83196763364481	0.870666737797913	0.690715242213585	0.876236431790376	0.869310620793305	0.864384279994427	0.828899697094093	0.788356912069857	0.857960211928093	0.680504316487804	0.865747649616981	0.877624205991293	0.877927782281558	0.817757323692465	0.817165958102856	0.848798713162965	0.651464855863766	0.863887151911081	0.864742141365751	0.870249224861839	0.778867413458324	0.795600170770736	0.864066858481026	0.685396314171432	0.864709411902055	0.867842582153168	0.867704961794708
K0036133AN	0.8464664266791	0.79881983404987	0.840924869571991	0.777663552737613	0.824490394119953	0.837925074393207	0.818069836426772	0.889551519934312	0.792845875781822	0.843220104325248	0.736646174134694	0.832009851786486	0.837946522006964	0.815196251935676	0.869936966921451	0.761085830771486	0.825627570370848	0.76686424755909	0.802935559109344	0.808308221571189	0.804557991411524	0.862522383395976	0.802896868857525	0.818018556324588	0.755376189535345	0.828489384755504	0.832777211778891	0.824082812244069	0.894231771587411	0.772854443459798	0.819930734744701	0.75417883076735	0.836699760025441	0.831173409213333	0.835400846119095	0.881274620670756	0.796527196217951	0.820080024953958	0.724255372785212	0.813356882334127	0.822421796038725	0.827814908888353	0.867777643927635	0.773442602396597	0.815031186033215	0.756838813880879	0.80072714790897	0.79918933594963	0.825290441424638
K0036133BCN	0.847917896259236	0.881192020795385	0.860080903709848	0.727044232782622	0.845614120807009	0.846861669270388	0.843871209011789	0.811798868991561	0.868693653783383	0.834657782381045	0.680386861838196	0.840463796616091	0.838123099555654	0.853537213332877	0.866940824755049	0.877443119838999	0.851156582052998	0.701789787951282	0.835683063781495	0.839902619648523	0.844245035986046	0.806859972745165	0.877921423914308	0.838135336295178	0.708844672698853	0.831652234723776	0.832192693730358	0.834427946445237	0.825651650078346	0.857098373412196	0.858983609962456	0.704171897813538	0.851334647854252	0.842271188014055	0.846329445540819	0.803958929336196	0.856942541383671	0.862255204011612	0.673953588652874	0.818334481364983	0.823276293407139	0.833899203720021	0.744404286107268	0.86416467529406	0.833084177263527	0.687625187759366	0.830264594136177	0.835752517580584	0.82617719938739
K0036133CN	0.822890466922203	0.815025640852898	0.873085577735755	0.738482770046834	0.862566029500463	0.869628750651696	0.855266729211398	0.797579058709367	0.817071854181432	0.865134838734876	0.693862797241988	0.855884023842906	0.85943360916896	0.857987553907573	0.841538339518995	0.809363558139438	0.869935082765974	0.722580007342886	0.855553691464133	0.876917275039915	0.853874486423779	0.797616008309536	0.822697221928923	0.865627699295812	0.729473292115883	0.859756018019986	0.865594937438235	0.852708095655147	0.812013325447652	0.811510854660003	0.857839423054514	0.719709275692451	0.86557915907114	0.871919896729792	0.873953375090597	0.80405690425873	0.82526774986277	0.830231938698642	0.682757441001193	0.850438702446309	0.856833404037043	0.863136218697361	0.761902125502968	0.803249626845107	0.868690198492879	0.707312799334352	0.86407992307228	0.86564738484397	0.859145862806735
K0036133UC	0.717676093968408	0.679757175804451	0.655305134611266	0.893022985443412	0.633746925198784	0.652445296933241	0.620724264226871	0.713013214649633	0.694466762166794	0.754656552319442	0.915787337250757	0.669804831051454	0.672561990993139	0.636342680596471	0.694032226360143	0.609108486397748	0.670803497184145	0.907980223819494	0.612744064381559	0.623272613177616	0.612123365598819	0.743393362475447	0.658404494787616	0.676003736639991	0.896141971222878	0.661189815997259	0.660714329601819	0.650651183928002	0.718789114421474	0.711609320280476	0.71651616124063	0.914934631656321	0.731789110569575	0.677239892863968	0.671204791391586	0.719183779096668	0.695015624828591	0.67346770375319	0.894155028048531	0.644035852051756	0.648831411438131	0.644247541378381	0.720094751656761	0.661784037618637	0.685084759882925	0.899152777685197	0.616437940796309	0.625072053901208	0.64816360132964
K0036133VF	0.819941518447898	0.83355146268143	0.866952177212646	0.697146755507454	0.861583695762552	0.853866024790713	0.858892879067337	0.76441691272455	0.817906771595894	0.838837515071154	0.64556943971242	0.841069941592143	0.851915870052883	0.852226977429298	0.834010123728951	0.845605482627396	0.85211390836801	0.672225842777081	0.846625649443789	0.863281927939855	0.858123650158096	0.767412636089686	0.837157877911631	0.856341673523906	0.689860523056989	0.849160392329908	0.850010076855241	0.841738591904435	0.790517159351425	0.816364490467918	0.852171579248986	0.664201696042549	0.854190533087518	0.862263508131503	0.862062291945995	0.775633288367025	0.835650854831078	0.839319331487643	0.639936152916665	0.844087186087882	0.841592174705202	0.845124947917151	0.718863658939807	0.821873326064556	0.849743483099107	0.659776552004552	0.853554516510943	0.856004027998936	0.837934362279992
K0036133VI	0.843000799338009	0.830083244126309	0.893601802777306	0.74457669310795	0.895518215563762	0.890205277074789	0.880076151112082	0.832197972818246	0.822640085163353	0.875089771875904	0.698781362761518	0.874734739254424	0.887366435451778	0.878288098539112	0.857195744153716	0.81676297682268	0.881439325342557	0.729700402498516	0.876232530350064	0.88521291988563	0.878803152411133	0.810871410364826	0.828792025691784	0.883238573428954	0.729109775628139	0.889088709699404	0.887762323510039	0.878403544160885	0.832976317806542	0.809243821655737	0.864584439341364	0.718428299985923	0.889089250202481	0.893680060523842	0.898122873378067	0.831059396331319	0.828066604294632	0.849178006672346	0.687819355875013	0.881085025914028	0.881145664265349	0.88365196899573	0.789437299458392	0.806351591068413	0.877348757155749	0.713146516855958	0.879049354532478	0.882730114672748	0.881448939751184
K0036133VM	0.84488298269512	0.840723817840456	0.887930648617675	0.74658341932238	0.889043824414954	0.877077115199109	0.874076735735269	0.817254452515114	0.832715772736008	0.870974857434687	0.695187687970713	0.874623946227368	0.881235346218391	0.874542759772786	0.861911562559045	0.830392797800251	0.881403504336466	0.725658011811417	0.874014553095162	0.87947271494723	0.870635444995028	0.810875240962217	0.839440690145095	0.880349110801025	0.73300577383634	0.875318537550986	0.879277808167045	0.87178911318242	0.827822113723919	0.820402123850776	0.864045296253814	0.715915060426703	0.889136535871473	0.890032674559323	0.883700934078383	0.827014341845537	0.834323144567558	0.855433850599098	0.684100962456297	0.864574387444957	0.872094471407269	0.871347101902002	0.783720432940489	0.812178503269224	0.866898283600017	0.710470438159676	0.864099867241517	0.87731151019335	0.869843291094009
K0036158AN	0.869056751523381	0.837759406221033	0.850177062543246	0.801435597649318	0.82972475893993	0.845855639114885	0.82626312104258	0.891615402461109	0.826518949419928	0.84494520385549	0.759378036738532	0.836758841152522	0.836517809984621	0.813777858097373	0.879884119253084	0.786146852793431	0.823325222705696	0.785241632070078	0.80479537516518	0.804604927352825	0.81555962112368	0.885760923807862	0.821683971122527	0.818813479286246	0.778438087302608	0.828600310383055	0.828937033682248	0.829188791260996	0.89011412454002	0.812479684752732	0.829954140341217	0.773060876925002	0.846842043452981	0.841503384199392	0.838283767177238	0.881326641526214	0.815982100137936	0.8377831512264	0.739946058240225	0.815474782119652	0.822854435997388	0.821097790371771	0.860914074306696	0.804613166101176	0.813838501168078	0.776569822626259	0.806216975140907	0.801610364962562	0.824896408651317
K0036158BCN	0.852482268362576	0.886977642170995	0.836463971750917	0.751218678344284	0.819849457021261	0.829999762459206	0.814253850467778	0.813919705469115	0.8693141223484	0.829915042341105	0.721240090581328	0.815782812927015	0.814062216214072	0.813964907359273	0.864926988729778	0.868418683595848	0.823229195892765	0.727612046654406	0.803971231006479	0.81183772962981	0.813685459190183	0.819359747857427	0.869787698795091	0.823209673803477	0.73144216676962	0.816796219630635	0.812748220611763	0.824795812395589	0.824615351765608	0.875239051930211	0.836941116217744	0.716317147402939	0.83904026897669	0.827120963999597	0.82861230177758	0.812024651770954	0.850143958477791	0.851313677443654	0.69536141034264	0.788003575768081	0.796048891181484	0.799158399596204	0.753538289923766	0.862174466005706	0.803043657109203	0.713452663133343	0.796703365979667	0.809586003643493	0.802910150361942
K0036158CN	0.844742760309404	0.837494097009179	0.883761160315119	0.763108099374211	0.876343637542017	0.875633386994623	0.866395723767328	0.815625191170112	0.824287833293216	0.865317073923054	0.709312847931499	0.858617629406146	0.863102055163679	0.856347443637173	0.864235564183755	0.824426157339842	0.872624910167005	0.742705662265099	0.865062802094469	0.87046978101526	0.859502980102357	0.808852336120243	0.830591340141214	0.87318602761684	0.731307152403629	0.862552466757104	0.864688301830317	0.855141363346747	0.82841502692481	0.814771671847711	0.873047585622964	0.733917647756797	0.879146421692848	0.877334218621339	0.873866502154259	0.822254690620984	0.828057457053694	0.848190004128157	0.701052572729328	0.850547961646406	0.855522788800471	0.865882633423083	0.788776968793775	0.801417456827634	0.860353993824195	0.729883009008802	0.859530284866921	0.8618672021238	0.868085059955124
K0036158UC	0.785512154092176	0.747782883186389	0.744056076436613	0.904109521812704	0.723174483647643	0.740101824698331	0.715661022436145	0.786808971545067	0.76056400138707	0.80721779693666	0.899464134170862	0.742951810705844	0.748385970357282	0.717941474588649	0.779697193100874	0.68908097830081	0.749898632744261	0.907723536216082	0.701606369395702	0.705699871760117	0.70457048915825	0.797254067711163	0.732522548474365	0.748229355243296	0.896418221358162	0.739884255779772	0.738416411616547	0.734138962189628	0.794538556142446	0.765540116944996	0.775325519209926	0.904569111798965	0.798172406198479	0.754909034795165	0.754152918603267	0.794576035940905	0.75938560460843	0.750092107728906	0.881188265660636	0.723817073244299	0.731379131413535	0.731850223296839	0.785066434853844	0.72619545397048	0.753701884901256	0.896542837501616	0.698518999296718	0.706633780434931	0.733116014255686
K0036158VF	0.832220260981292	0.817878104959579	0.893819841623719	0.701188675355659	0.8939967612766	0.891617484855107	0.880925752044211	0.81234920462764	0.805989130480636	0.851419727738705	0.632550685780524	0.871401870732496	0.878782585738634	0.871646760257209	0.851678034036962	0.817798021123229	0.884053040073284	0.681058304033593	0.880636774143314	0.888614512265794	0.877850450325016	0.782942303588777	0.815370258465694	0.876529657383503	0.673937989438469	0.875791870651704	0.878438850452613	0.869575028185503	0.815934007728172	0.789654341845877	0.856796982599367	0.661020427227383	0.871869906969578	0.885802048139464	0.885215137901981	0.814335605107166	0.816391699626867	0.842627790262159	0.630851005024475	0.87563577953238	0.877867028632625	0.880471619407086	0.77673549454365	0.796066263533658	0.864444715505244	0.664348879869653	0.881570473946652	0.878547499200468	0.876428649838606
K0036158VI	0.819567276833344	0.820252014896092	0.879691187206178	0.687203719245452	0.88212563892299	0.876698233044	0.871022659516777	0.780677258093765	0.800573955965091	0.832892422721795	0.622596278182359	0.851546986900761	0.858100528480751	0.858004365932907	0.840430222099384	0.820995608794456	0.863596250150955	0.659568775532224	0.86555435083572	0.876308050659744	0.866195658563277	0.771733500063647	0.825161466087718	0.862295682273792	0.655412742580319	0.855012234577883	0.851235685190458	0.855798145957536	0.796787222528679	0.798782451687405	0.849967547485213	0.641197183995481	0.863256279825559	0.868139883074896	0.873985775364887	0.791614857269717	0.812371773008782	0.839062913628774	0.6178925825911	0.851783009499826	0.85491068784504	0.861563508800684	0.74582105521031	0.796599474352011	0.850985202027624	0.645435094499049	0.862143066815203	0.857346138883878	0.846418924285203
K0036158VM	0.833116327765239	0.842545228310438	0.893393355689643	0.692830167740806	0.891499080819313	0.889030152128541	0.884485070898002	0.80699332056417	0.823989353647705	0.84430332688631	0.638949240241844	0.868581853670192	0.873562931480995	0.873042305173595	0.863650933586706	0.838679628824068	0.883812914375027	0.674380397455088	0.878760133271638	0.883090618706128	0.880383256490964	0.787111653004642	0.839410751699155	0.873117606603889	0.663546541036434	0.874232911476793	0.866347220222592	0.863300052443993	0.816017723138042	0.807131399675692	0.86342850726431	0.65679158788848	0.873222740882544	0.873291567995917	0.881819808183236	0.81307640269369	0.830335664341872	0.855133112621392	0.621485346850935	0.865774976692956	0.864024443205376	0.876469970554972	0.76992136755143	0.810704783116429	0.857386656464321	0.647996909543798	0.880326480364034	0.873400488965786	0.862199912737312
K0036160AN	0.858184915005195	0.846376678214371	0.838793263313037	0.755759502648696	0.824483161282407	0.825981930916375	0.812991716726052	0.86351843465036	0.834187204478063	0.8288081388938	0.719734622792607	0.819097924401817	0.817431784548326	0.814124382119006	0.871694966531545	0.81119773690248	0.827409475656793	0.736715052125586	0.807807696968781	0.813461349719439	0.810010987643705	0.854446379037145	0.825622195871026	0.811147861047181	0.74282796809183	0.817892376111948	0.812281143417931	0.815092181912079	0.870803391516859	0.817903287381796	0.829342358417852	0.734598670355416	0.832889269816214	0.826441433551212	0.828275378444164	0.857611644147173	0.828157471019282	0.836606099800004	0.702142048495343	0.801085831540349	0.808164131400115	0.811857227051279	0.801361089653998	0.81325203912289	0.814863104484669	0.727525218224477	0.803776181350367	0.804056584543148	0.808201748511313
K0036160BCN	0.835010975680979	0.891661581094962	0.812129344521701	0.738612252322947	0.795076195917224	0.815461003642007	0.798975442693386	0.786143758679525	0.8557200765973	0.804758507125358	0.708790064252162	0.786289706902679	0.789204470082263	0.791526157147422	0.849459395865751	0.865573738448964	0.812311465549084	0.720447501660904	0.772372580536913	0.789767456278165	0.783708653214891	0.813302754342491	0.865515543298619	0.796049683664498	0.725658307893506	0.789540236931576	0.778485592520086	0.805717903944974	0.79871926502628	0.881079437968114	0.828633371930194	0.708868535578067	0.820267965568832	0.808284745318621	0.806038188348211	0.793674847601438	0.84312109362874	0.840629307187226	0.68521476963777	0.75617819912306	0.766040516861523	0.767551373531438	0.731253860066544	0.865373484054094	0.78403589128279	0.705825849597215	0.775863843893529	0.788859147472926	0.774454339674129
K0036160CN	0.851614861426735	0.821318419924573	0.83838580695571	0.822545957730505	0.829760882797905	0.832213772691281	0.814078448386763	0.805619340053808	0.834311992068399	0.860469920367468	0.792222229152637	0.826776604526789	0.825018101349345	0.819862468148107	0.847995257811704	0.795363469773535	0.845421683040625	0.810151862156686	0.813940021109164	0.812494125237493	0.812476680111732	0.81941174531382	0.819929570527308	0.836563796520738	0.810680669743953	0.821985926879122	0.826077635248482	0.810821307975031	0.816634983923605	0.833617321126361	0.854834120196431	0.816126170989173	0.85547269529869	0.835930304308832	0.834213057005395	0.811354151453172	0.835263621900467	0.827050303830702	0.787261846079759	0.810777402785378	0.813397061597711	0.818953985657016	0.77786204650199	0.80801378454206	0.83558676532393	0.800245032652258	0.811716418210348	0.808226424923452	0.808568242581821
K0036160UC	0.757222907414729	0.737335704340802	0.70239542789387	0.892301817319181	0.680763258012528	0.695904895953332	0.666647191610971	0.734474031864157	0.755161281572361	0.78972660763292	0.90577588199547	0.713788254867449	0.713347193243721	0.689159335030821	0.744209416549441	0.680235349970976	0.719911356513442	0.891985431171226	0.659733873018113	0.668307111944636	0.66363056868455	0.75925210101837	0.712377712743364	0.70994525161367	0.893565127982125	0.694554504105187	0.701175095606869	0.692049818002917	0.747114617748891	0.764041675335843	0.761905307976808	0.906294102305121	0.765733136958098	0.714083161309574	0.712512587922421	0.738520842004544	0.749710855537261	0.721077897373329	0.887808809138711	0.680582971178657	0.690160534500842	0.682849140508406	0.71479787480667	0.723108875988571	0.721871585384724	0.878781626386812	0.662211258130645	0.675105523674041	0.678133688981267
K0036160VF	0.83625718901973	0.837603744434021	0.892160192366593	0.722275035481507	0.898474314777683	0.894757371726933	0.88617944393359	0.83127569851255	0.822730675061209	0.869296975301643	0.676967410353153	0.878224552661721	0.881745482454558	0.880547320474292	0.85780657100796	0.816620319572785	0.881471103169933	0.711282082749875	0.877094219846759	0.886746786435834	0.879204604261528	0.80883892080052	0.833662818886858	0.882026070504912	0.70915959565109	0.886168328930093	0.883697493596841	0.881001488431319	0.830912943752299	0.802646233173201	0.861897086005742	0.694566519573715	0.880827584212999	0.889295862428508	0.886742791625711	0.830158175463458	0.819967014352147	0.855606799913778	0.664541170906792	0.875888971671671	0.873365612181363	0.881256955034204	0.783133115207093	0.80815234962013	0.869112863959422	0.691715274800751	0.876955685795161	0.869566555384632	0.879991474360556
K0036160VI	0.836476613867953	0.83176282726962	0.893254877518506	0.715499724140598	0.893976684764146	0.893923717182764	0.880678534127832	0.821595504061432	0.822025588427389	0.869435800038568	0.661231928562106	0.878432333618899	0.878177167415659	0.876342506060454	0.861061859369407	0.819149326706487	0.876376506692633	0.699847187230259	0.879804482745224	0.88755492253921	0.882956967992728	0.804373958076964	0.8335774244231	0.878984746471023	0.697974263477558	0.881582623681547	0.87855261763297	0.883050771150712	0.831001553018644	0.799953845883766	0.858198349964653	0.683673816410631	0.874342378265631	0.884307774071943	0.891172327413523	0.82848369610233	0.822861851057637	0.85168866588923	0.646056442726583	0.873365795062985	0.880124680213915	0.877288995664358	0.790433945642615	0.809200823437753	0.863308542198688	0.686294930349649	0.867798650701978	0.874255478730648	0.8762208835139
K0036160VM	0.841624570576736	0.835623713757985	0.898506294305046	0.721104614294823	0.897268527638528	0.895159077718344	0.885841344491809	0.828073974104566	0.823410795056509	0.867406148450537	0.670355132171565	0.884099302586826	0.880772521840543	0.883189053589174	0.863686178310351	0.820780060336378	0.883589606025219	0.705699324957099	0.879247476130161	0.888727479836578	0.87865362845154	0.807098317373992	0.833941590840691	0.875992184788073	0.700082780852688	0.886554068023902	0.884269633371018	0.87998402450805	0.833909092901256	0.802810648518834	0.861093856739873	0.691888212650519	0.876570199466983	0.892744474664418	0.893238909946449	0.831402814686912	0.825093034598365	0.857726447733486	0.652619289216579	0.877439064643397	0.883067896715904	0.884136451727712	0.793323963688151	0.807427363814921	0.861041646177243	0.689341227987642	0.874730044717154	0.874884609516625	0.884190226194319
K0036226AN	0.843653813671441	0.788884834611839	0.84039600222758	0.777701610351419	0.813701614746666	0.82985802557245	0.805084555209395	0.876070507454	0.782805962898201	0.831819159499643	0.731776507768167	0.821504258529787	0.819632987926769	0.801464460569965	0.862153700549193	0.746384062556899	0.818192535248164	0.76415951383767	0.798091577167165	0.797068640555945	0.796292730266155	0.85136548858881	0.780354278169525	0.801399400231131	0.755675331114288	0.808787884077486	0.81428276947814	0.807946154354896	0.888856823993274	0.757769226061974	0.802488818276585	0.751746330562366	0.821624912762865	0.821174402919173	0.823635153557996	0.879411224292609	0.787230503654125	0.806497567689279	0.720306682014704	0.807961655112615	0.811412290282729	0.8130434681909	0.874728378370714	0.752804656432682	0.80531987102789	0.755992936265228	0.789892708231908	0.788832587702505	0.820325464796307
K0036226BCN	0.867970836221203	0.888000417970284	0.855914882196372	0.777274459062358	0.834244390728806	0.838561168946433	0.829271541700843	0.79845029592529	0.873228929157397	0.842544763209402	0.733619885620063	0.828160622573482	0.835857521174309	0.831387168013042	0.877344683726079	0.878800014556992	0.844553426287694	0.746114822580289	0.827133973336155	0.831748298826997	0.831542563828559	0.812039727700225	0.87703205675993	0.832110006599846	0.752477112751304	0.819273663327336	0.815431224438185	0.827154937190441	0.829462555695336	0.875095376086528	0.85970172674405	0.741100000968677	0.855072677386088	0.842529990214524	0.835469714874541	0.821586042276718	0.861807900417036	0.866867564095642	0.720051019389276	0.804012300115915	0.808197082437884	0.816179422905461	0.763164649768152	0.859787341089999	0.8224291909144	0.735803819340626	0.813321867008578	0.828473708825204	0.80949616080392
K0036226CN	0.845009312402218	0.84953898808613	0.882325198199597	0.728395798344109	0.862935849381417	0.867333045853813	0.861933061758837	0.811257670878022	0.832523576436812	0.842023241705935	0.681198694743704	0.846326049783183	0.848563068870045	0.853364621428818	0.863692324129024	0.848457254993791	0.878852885828383	0.706405925706415	0.850290583476618	0.865526365890589	0.852017450543079	0.805334631943499	0.854907995165612	0.857770583383686	0.706914671196271	0.846748959481696	0.84849554470447	0.850494469679563	0.822705587742935	0.8322065664141	0.865863296121526	0.701016351539182	0.858818179381516	0.862341771078929	0.866070745599616	0.812409350853521	0.836965825813115	0.853508556231535	0.665775710365504	0.843072627216505	0.8466784183988	0.847268047789274	0.756986242353924	0.831657810302307	0.848703240174975	0.692003005248571	0.852883346654228	0.843047016996856	0.844619942837489
K0036226UC	0.73882240991828	0.708794108173472	0.691317290820127	0.89649802558846	0.669101812755444	0.687750980072925	0.658660250594336	0.736118462506493	0.725962124341033	0.78107973846334	0.909192211191279	0.708492232056063	0.699100878655085	0.665194820416617	0.724958423502112	0.639778059959695	0.709004832258207	0.907120962731415	0.657585090566103	0.661071040905129	0.646801220620433	0.754660676375494	0.687394012795983	0.698447387420362	0.890129125805074	0.691358998405459	0.70014912720476	0.681646216151649	0.748196412435265	0.728036600898258	0.741889555078654	0.908274593768724	0.755738159799744	0.70675079884327	0.702847887946702	0.74608597355113	0.71761097236527	0.700875170364652	0.896100351610612	0.674394761778802	0.68027913833884	0.681104941277248	0.739505153532143	0.682003247733206	0.715605286481044	0.892005868138293	0.649275211045317	0.661858446061959	0.680080976764119
K0036226VF	0.830965732314979	0.817936607276143	0.900025691238939	0.716893387626454	0.899636786317514	0.896892595540621	0.894983279979134	0.827074783822903	0.80408150182554	0.857581313256298	0.65279908878383	0.886372399428022	0.877377522837131	0.879522030748972	0.854932083884875	0.802543921735233	0.888938997293932	0.693686056402326	0.883575692121229	0.890711219968255	0.880656973197749	0.79450140974817	0.817083778066622	0.878782087532023	0.67922475343905	0.888095937890859	0.890686712166493	0.877594500017704	0.830679614691162	0.782490267534464	0.84402440259202	0.676797400195841	0.877140135582998	0.886224545355526	0.895318605293358	0.824865977036299	0.812593247246869	0.842151031596211	0.64356464253794	0.886945199601218	0.887283285476213	0.893840457447873	0.793980167384368	0.790222382424795	0.866456676910508	0.674982468694208	0.880390909510003	0.874712392360178	0.887662529973119
K0036226VI	0.833295366061095	0.822170587010408	0.895031475000829	0.722220498170835	0.897329264911928	0.894589262008943	0.885513707172091	0.820455117753614	0.813491419355154	0.85707341326264	0.666399843685918	0.885041565177481	0.875030960578217	0.873754006697637	0.855322381317964	0.802732707827624	0.880299896094371	0.711303464590204	0.879438205593268	0.888684544846487	0.874379576958913	0.802419360178574	0.821197409059692	0.87731718650382	0.697831965157119	0.886804190291371	0.883961594819128	0.881821942049379	0.836228000393603	0.785934610162719	0.85601453189747	0.684468423596972	0.869838944875859	0.88763765767435	0.887626601994418	0.82261836789466	0.813953356384971	0.847254556266427	0.653505861566963	0.884531170543278	0.877816942655724	0.882613899413621	0.783513197308304	0.803839260286246	0.868818308425352	0.684774981604097	0.873658303927717	0.86674449654402	0.882531825171861
K0036226VM	0.834793673029662	0.828769922894263	0.890455885282883	0.717712733198325	0.893896438465143	0.891000929783134	0.887365425823101	0.817324365777643	0.812961253189596	0.859505342247673	0.666959343633908	0.874942104624561	0.883365706998174	0.88375813853168	0.858719085438583	0.817117472765131	0.887449114568356	0.700900532184254	0.882480899951644	0.886740708922565	0.879126214287358	0.790069773357425	0.830472333536601	0.879730125251501	0.688749545769939	0.882151518347744	0.882915846096797	0.87651437414545	0.828544020580242	0.798224460459911	0.856470163012937	0.678855918610644	0.875065730812631	0.885461779782266	0.885894365423009	0.817348317406577	0.822637864881863	0.849477725712955	0.648267025023062	0.877726769831974	0.88045601061323	0.88112180534854	0.782082656804776	0.807025932443271	0.867682244067081	0.672611438195532	0.874174527075482	0.878256334310232	0.87641036957589
K0036241AN	0.863754643095859	0.819474688424252	0.844577379666852	0.7882414486797	0.837388574125512	0.844946865249284	0.825837923043987	0.86075439230805	0.81322984136337	0.84753648962557	0.738367396923723	0.840778055815805	0.838850119509341	0.820060424367175	0.867327384327078	0.789501712359987	0.832196197683653	0.76543890152624	0.809372267009701	0.823847433334332	0.822706052952172	0.864625511970301	0.811824250058275	0.829380859582863	0.76974574941433	0.826528385752453	0.828308467306721	0.828053262439484	0.868192118542673	0.800136478549848	0.836490780694582	0.759267445941175	0.846115371629717	0.842513880223437	0.840190142039187	0.862110638177089	0.819536771953583	0.829381203301851	0.734904139411354	0.820646663145815	0.823623283990161	0.826621889987801	0.839009468954939	0.80349465127307	0.831942435984613	0.764245134756154	0.812203912633217	0.817157239923589	0.830104985790088
K0036241BCN	0.846817018112563	0.87913564881611	0.8549010978036	0.715553498386709	0.835113480854884	0.846118465274229	0.840147699314884	0.799452401746158	0.864198709528693	0.823040977813071	0.672658179990099	0.82909936407368	0.827492980740933	0.838308534833398	0.86233544316373	0.877331300874013	0.84658119904279	0.693081565384649	0.819801722589467	0.830300586673421	0.843097117897422	0.802100612305314	0.871883995406571	0.832316641062625	0.704676175424758	0.821210633164689	0.81691494799899	0.832893730284285	0.820642503369887	0.864561004567054	0.846226411330556	0.67545674395667	0.837833204501308	0.840403547028275	0.836861944701593	0.798209548435283	0.858526895580777	0.863382722849672	0.655363985032422	0.801895785283402	0.817200421788633	0.809008413348015	0.741317554082751	0.865659836455592	0.82532386044475	0.677802653544807	0.820151069589278	0.824233380455378	0.817188960461266
K0036241CN	0.839053076512839	0.815095066680699	0.874701821136198	0.75959956874138	0.870090088801185	0.872483459398504	0.854428726306108	0.82236209699706	0.808805440618854	0.861446369239579	0.705387582429646	0.869634303539353	0.866386862913051	0.857931191140877	0.853464395298211	0.801043629912745	0.873228847340244	0.742441959492416	0.867890251064254	0.877230795440731	0.864440770187299	0.801412190178892	0.817337270193785	0.860974305763201	0.736485787461602	0.863208929159615	0.863103089842321	0.857429304267714	0.835572206936195	0.78804912055901	0.863344889265432	0.731122944495763	0.872352109565809	0.869705103748005	0.872882397719591	0.825408080791973	0.825593110911827	0.850375955673652	0.700546947832942	0.861771029381592	0.871908300136496	0.871660273450766	0.788833059373431	0.79308419535967	0.866791976927449	0.725113945408971	0.853046702150635	0.854159514564077	0.860010682240954
K0036241UC	0.79513054675302	0.745488289227762	0.745051639057198	0.877128245760876	0.729635719506649	0.745849652510538	0.709707051232972	0.793506420173556	0.759031303358044	0.812392018063061	0.868425116992369	0.757901209133431	0.760695527168259	0.725778787086353	0.786066467386622	0.698990325265213	0.758671818108769	0.876545836571284	0.713334172210872	0.713923275533494	0.710224314484226	0.795720433758544	0.723438408461255	0.747576188246679	0.864646140916547	0.737843554975485	0.74346786382724	0.72555844189378	0.803293553005059	0.75753612924293	0.77802964780575	0.879583987702817	0.802455474339069	0.754746840479601	0.750076077150127	0.79039172702682	0.760871523633759	0.747352220187403	0.859202437170109	0.73028094570541	0.738805197055988	0.745042310195515	0.779555681496751	0.719922652797372	0.763509243296494	0.864061927784654	0.703823973462623	0.715174306752015	0.738309629449302
K0036241VF	0.827048259382866	0.81873211844701	0.886275216413773	0.729977352738029	0.899181528748669	0.895287115279216	0.881127489551799	0.838325579240826	0.801974711169586	0.864596324507614	0.670499196487285	0.889457055206663	0.88191947958924	0.875616875937311	0.858114228624537	0.798668020351309	0.882501852232573	0.715951400377582	0.882030694712779	0.890083877866281	0.885145161755825	0.800310962439523	0.814094297773807	0.882731743767866	0.713791369251017	0.894346429228238	0.894457343733235	0.88644635526229	0.838909378184688	0.78018445327922	0.843331526637303	0.696617622890354	0.878526341388697	0.886053195207784	0.896210534524885	0.843449834880449	0.814676710055487	0.841637498920511	0.668907700794073	0.893872674568226	0.892004214972388	0.900553922907133	0.801205043667713	0.791021673362076	0.871257913780193	0.701019723037783	0.875871801135851	0.875079373640053	0.892508590975099
K0036241VI	0.834418990489706	0.814856036307797	0.885769794559376	0.726818961067471	0.902859988582535	0.894669308010504	0.882731922791906	0.822407226728269	0.803101094018114	0.862717984805446	0.672746757697236	0.885926346786793	0.884603913228974	0.881519504152968	0.855395353670912	0.79837598775798	0.87244986141279	0.710867239149623	0.87644020867624	0.882237570818942	0.883691344778834	0.794939397807454	0.821010504819153	0.87915569143456	0.706182668069457	0.879290513939346	0.883800483115398	0.876544888728509	0.824935963115057	0.788952448906179	0.853036312393242	0.697795787170763	0.876826665810811	0.895071456853323	0.892408247857885	0.831012191673628	0.817825954319903	0.846825872173011	0.664000487960387	0.883647595123966	0.884452784983586	0.882048847976702	0.789628002686703	0.798406124665971	0.871109998056197	0.69109810430289	0.873537540658536	0.879867691253342	0.879527030106579
K0036241VM	0.839328193929196	0.840782920594251	0.883439322395741	0.710186758699614	0.892697654967629	0.886655782091768	0.881851026312612	0.812229467978058	0.820544729966697	0.850292349036123	0.657507153229349	0.877787238125443	0.868172935402527	0.876767059702589	0.857644138214225	0.829010933806888	0.882113731116192	0.696676172016915	0.872966197682646	0.883720543363603	0.883965205610114	0.796578478052576	0.838632474992362	0.86873125316827	0.694485830900096	0.872644186920156	0.877126769978791	0.872375572046886	0.826227328603877	0.807486788274045	0.8602357658306	0.68036423178607	0.867721126134053	0.878609453806677	0.883363436486108	0.823452444010193	0.830338706708906	0.870898562093884	0.651245664855151	0.877453849886657	0.876126676865802	0.884916241338023	0.773650829438804	0.807252306426197	0.861891353083581	0.67790859015611	0.866170888930374	0.874289361112001	0.875103717962355
K0036243AN	0.865071909503182	0.852245749308608	0.846550093298317	0.79293870780421	0.826791536649658	0.833464661710651	0.822687090371936	0.870901991636696	0.835247498697013	0.843540778033057	0.756064852009762	0.829385920364936	0.830486214302592	0.812864703544777	0.876824532070532	0.798674436083299	0.830444181243191	0.770481349445563	0.811263492965843	0.810546766339224	0.808434581391332	0.881296780506278	0.825369565657832	0.83378944052246	0.768670683492918	0.830651356289721	0.830541890314453	0.835652539439507	0.876581262989714	0.826296879354444	0.83246457388407	0.766835817673491	0.845567406419125	0.836992003059159	0.837232728493684	0.863037604177254	0.827750476571773	0.835658780546362	0.728720174214624	0.805556175026136	0.810819457398434	0.812855255232997	0.836874230160166	0.816909732277543	0.818187500795393	0.764452911296404	0.805793748855947	0.813055804517196	0.826275736015586
K0036243BCN	0.866537454767378	0.900477969519015	0.85779770007321	0.746333715687158	0.84452627539343	0.851925180066435	0.843721253049131	0.821938042275737	0.874290167168635	0.841385360481937	0.707853461602614	0.840931614306241	0.842688102140202	0.845392469857697	0.878117617974014	0.886038103581752	0.854831760274667	0.719152298912381	0.834927934954971	0.837261742554267	0.8487793738796	0.829913623385443	0.882613644998728	0.843780978856052	0.732736126359799	0.833567966174804	0.834517009127838	0.840570743210364	0.837343221874814	0.880678310242906	0.864305428722781	0.715042800837431	0.853593249935726	0.850415962644309	0.84912743717283	0.824391455635672	0.866769786696747	0.86983371394382	0.689503444094372	0.813909898288945	0.825873412863974	0.82661324620844	0.768067962568914	0.875494991354414	0.837060363755102	0.711833208687752	0.829441453735167	0.83777761741067	0.830704090821898
K0036243CN	0.848276546212478	0.831502635057305	0.868077405611298	0.794006002717871	0.850130318483341	0.862284178170738	0.842200737167523	0.807948029805624	0.83615189127019	0.864975375601733	0.747405935137593	0.850793149054209	0.849199180497132	0.848097996637781	0.851585039244756	0.826631963917022	0.858498688503395	0.765407774147732	0.840507569003462	0.84704280334491	0.840778256644018	0.817620988136707	0.836016291838709	0.863980326136947	0.764230555195656	0.849227134417876	0.847446352391748	0.852390763754636	0.817865322106275	0.835925729129042	0.868486215551499	0.757002468784027	0.868099207351757	0.863520941837279	0.85768666872481	0.804055007648561	0.837512805232745	0.854963511152794	0.729765741416879	0.836817211421488	0.83840819519905	0.84702578099136	0.782357937951514	0.821486396585042	0.852482544669702	0.757328644899926	0.837176964203409	0.846962192740367	0.840448469397923
K0036243UC	0.761106507414585	0.732058347879689	0.698440178729972	0.906123305203448	0.681510616338094	0.7005426271726	0.671421836888597	0.749641824296845	0.741525020369844	0.78452176615764	0.913068665452832	0.712084129893116	0.712329360600813	0.679072693088703	0.744588468923614	0.670518824425094	0.709936126664055	0.90415889179078	0.659539228647125	0.65951995032143	0.656826528090119	0.776940876585315	0.71074458236282	0.709722591902345	0.902955896233507	0.698473903935888	0.698037519936924	0.695110654305645	0.757693243733031	0.756491738878306	0.752923735589598	0.9121340056856	0.767918978115758	0.715403086645774	0.711543646633681	0.75316954463776	0.744769637869929	0.717715538184864	0.89919016528752	0.678160611417524	0.684873472561642	0.687037781403809	0.746084902205999	0.712298818337657	0.720979882791965	0.893591820595861	0.660176412924393	0.670811933947192	0.684684248420839
K0036243VF	0.848032866600851	0.844470333572441	0.896173114903228	0.72181074482433	0.89924638016345	0.89937911891356	0.884790079126623	0.812412180296642	0.827834364254586	0.86707486189897	0.666516624102465	0.879902890153035	0.882213992058199	0.88360904160529	0.865362985098421	0.830962931733914	0.887740444861583	0.700942617622908	0.880979403359085	0.892871990430043	0.885589197480821	0.807390220344876	0.831158491482597	0.892671191507026	0.698044735570664	0.887944152286482	0.885643111011802	0.883272043179581	0.82761541995151	0.814701647216292	0.860377777105124	0.688996749537747	0.884691676257256	0.895306396793014	0.890605990033248	0.819259118032078	0.839311372570108	0.85996563748785	0.653075952582474	0.870571929607413	0.87444645401922	0.882657155172341	0.783028057627513	0.817151983096753	0.879027990615793	0.682624548337996	0.881912104147171	0.88230091435812	0.886276974719682
K0036243VI	0.837043093719121	0.841361777519343	0.903332698199332	0.714476687343858	0.904730353990451	0.909194727259412	0.896251651952425	0.821337603035326	0.81690341754672	0.867628751233049	0.648025520678651	0.882676694336246	0.888224438584247	0.884605020437801	0.862860548004744	0.827466893415975	0.884446486314432	0.688766729969	0.884330981740353	0.896072391950331	0.890255921453467	0.802862093576335	0.840250039598537	0.888884238118764	0.681586337862244	0.892968534515527	0.894119522223117	0.892862548356991	0.82466559470984	0.805767023178826	0.854721459951722	0.669466441017628	0.880461250566859	0.896470156281861	0.898462557465928	0.815198689264643	0.830041963900772	0.863135249257001	0.638213099990932	0.88452287565005	0.88110929824533	0.890442207138863	0.788641244690026	0.811221116438238	0.883393297611385	0.667967771673564	0.891136380070922	0.888995792879593	0.891342481002056
K0036243VM	0.834014260805843	0.826394270324585	0.888994221398744	0.716620628617361	0.890392817738658	0.890697811285147	0.882975810881905	0.819893975314388	0.803579568063825	0.856322695793753	0.656662929434658	0.875465650505141	0.873068738526541	0.878812547789484	0.855338779344893	0.817679969708209	0.876101768461279	0.698064469068926	0.877340873792495	0.885340234770304	0.87893777825052	0.805284450982362	0.831796951372155	0.882431705877555	0.687351658626331	0.885616969605006	0.882597775440664	0.881031261352509	0.827306786909307	0.794074997880843	0.850882584667667	0.673760174352558	0.875948265623886	0.887526776368596	0.884235210857155	0.821421405730317	0.814791304485812	0.851732010288892	0.640079979923089	0.874393805074665	0.871473460670338	0.881505787454436	0.799654899736454	0.80189370888361	0.864033614099103	0.678169339690424	0.869438696415455	0.87528394230458	0.885532200906148
K0036255AN	0.856353531969659	0.830234956065699	0.841415293994701	0.773119233692925	0.8238578619292	0.838457271646242	0.819304877926195	0.884807686808371	0.818930273088958	0.825642831679244	0.728860195712206	0.822378146581698	0.821367387362749	0.813852403089876	0.875699338774392	0.791173569143488	0.828656101506274	0.752008067137502	0.80260091359518	0.808873924001924	0.810650343577091	0.863436270852067	0.818225982338369	0.817799293966563	0.753145088681654	0.821897406393722	0.824737405321405	0.819561750477024	0.890882650690288	0.799069542723534	0.832224584372925	0.747975469822992	0.839722025663026	0.831245197830261	0.835469295430529	0.874780546348314	0.818198535008927	0.829191704020383	0.7107754199524	0.798994940846956	0.807572662697899	0.811055322650446	0.844652751104705	0.794858308894043	0.817494609303944	0.746369178129811	0.801281899674257	0.805670437749488	0.819315654811657
K0036255BCN	0.856296551172874	0.886265524502114	0.836595458247927	0.738961080851293	0.819201705464073	0.828129218358446	0.811682786723142	0.785055376436988	0.875875411661189	0.829764779889636	0.70733014981964	0.811786125593287	0.820102201011932	0.824463547023756	0.8604174780325	0.881377401919997	0.840395939220672	0.715962456860091	0.808305467404714	0.822324548590777	0.818777228089741	0.810447529363181	0.877522887540234	0.82757945647824	0.733587811464546	0.813636506677731	0.807386229646829	0.815692731716282	0.812300936311834	0.892170738465046	0.860533855132857	0.722046954272289	0.845913733690792	0.832846570101607	0.826740904955494	0.78384539036193	0.869120910219886	0.847512785121038	0.692286808991313	0.785207234584432	0.786488186954232	0.795516801080753	0.724614409444621	0.874514947003121	0.808546640901712	0.707820908245608	0.813056349825633	0.814139479094627	0.793113652675756
K0036255CN	0.837162349260949	0.819737945653304	0.849289851615356	0.833501393543018	0.820529547955669	0.835859332332356	0.82715391335028	0.819171191984328	0.812771520095253	0.865945646619646	0.806963806276806	0.83525851004466	0.83253835540082	0.825091930809106	0.840089906456939	0.780728203908287	0.853155064328801	0.828395958515905	0.815799039895423	0.820983321005385	0.815722913035441	0.828144199897177	0.809651443270619	0.83424996730432	0.818778915704142	0.834735489819802	0.837338350036965	0.825243933707805	0.82629584539497	0.82310982330607	0.859540184890483	0.826282382645075	0.869445754253389	0.846059471563246	0.842253692744234	0.811319343936451	0.825692170917825	0.837268370286472	0.790067179250368	0.817575046303978	0.82933063451154	0.834499311162306	0.788806104869947	0.798172159331871	0.839904421883998	0.809118694279922	0.811606591579727	0.815885271830056	0.823299615080601
K0036255UC	0.700551609618632	0.666307520362831	0.637130724574445	0.894647036083553	0.616653021190782	0.63540832163793	0.606722762066746	0.695765725410597	0.681317590447872	0.732859071347074	0.910922967634709	0.649457179807147	0.650761076197649	0.614402864496189	0.681416836399085	0.590360538814056	0.656565586680953	0.900582712778174	0.602743450562186	0.600413412563662	0.590472574627897	0.726680832483299	0.641525555239076	0.655997354934029	0.891904868532231	0.646514106823665	0.647022411616919	0.628573295508745	0.705278418281709	0.694292656089826	0.698959944366368	0.916849154295484	0.717107232245559	0.654921618572486	0.652329328417662	0.706444396055651	0.680087024066845	0.654703670203852	0.895638754330914	0.62210331049525	0.631249913504916	0.629471534247789	0.700641466692874	0.639022751068847	0.669308837138263	0.889539772724864	0.59553040175343	0.610986895601752	0.627471302011389
K0036255VF	0.836582063720194	0.834441155026235	0.906073637531023	0.725045650441042	0.901703946221314	0.900171418052149	0.894245643725293	0.817712436083477	0.809695438062756	0.864356483267678	0.655516328851227	0.876180840566952	0.883093763071523	0.875757583292012	0.85754317303396	0.814595517427765	0.885136926154449	0.707780578093904	0.884575890289303	0.890436159994105	0.886540485976887	0.80187771178247	0.836083697977535	0.894226578230042	0.703833902354937	0.888910711306648	0.891961725781478	0.884090959205959	0.832412313410168	0.8070359657005	0.86565988665174	0.687819609306072	0.886708271035081	0.899317173874724	0.900616929254657	0.824713503831436	0.829658249473682	0.856405654826734	0.659906291412708	0.881220535956296	0.888019211350382	0.884400277289551	0.786713600170198	0.809201138720486	0.871817261657858	0.686493913240336	0.881026425881878	0.882159034198866	0.883388919742829
K0036255VI	0.832585385151833	0.824586258533889	0.899015061707331	0.719069048109	0.897877243556461	0.90646208944061	0.892920833937766	0.822178247426455	0.8086905287136	0.860366500665252	0.657150866874434	0.877316155104242	0.876179134048781	0.874969857408708	0.85785829809571	0.806724882808243	0.880969746673446	0.700860559034884	0.879332059613618	0.888066658744366	0.878609750534745	0.799454292590366	0.830503384744248	0.879390424289396	0.691591528842733	0.886422824225697	0.892109761553186	0.893333110200712	0.839767948181063	0.792242879806988	0.86310547602822	0.680745620563818	0.88156778304675	0.893726511439083	0.899895003971448	0.826531684405874	0.815917534322047	0.846962132073115	0.648037352080354	0.884840446830845	0.883058787497618	0.886236739752636	0.797326391298185	0.796537839801552	0.871517112065749	0.682302583735007	0.876437635525807	0.87842726098805	0.885112453590399
K0036255VM	0.839674806307914	0.843596531564933	0.907450797256417	0.718155871121164	0.905629774945135	0.9004214602783	0.894035022504206	0.824693384473877	0.822183020530793	0.863488519009139	0.649831109444901	0.876039739098681	0.883563491375015	0.88942217915318	0.868182420167586	0.832137772344916	0.899931464918598	0.698741883208474	0.887016052949734	0.897774253773965	0.891615355699761	0.801553955911531	0.844151059116541	0.886336544837789	0.690971456923859	0.88177694318615	0.888606531204262	0.882952205809501	0.843662942556674	0.812881734475664	0.870448272481591	0.676836636728802	0.886126030933316	0.894189235763988	0.899904595566349	0.830839183973147	0.839540326014814	0.862014823129733	0.650513850108255	0.882955169884963	0.882872941718048	0.886919410401119	0.793035162205049	0.818002223602116	0.875343309208935	0.677227315546131	0.87602072110064	0.879630865718951	0.885638451208746
K0036273AN	0.859038500498759	0.817190957213128	0.86024295468015	0.775123339806811	0.838104721533396	0.852287236618752	0.836942058080571	0.88547824184528	0.807496328822948	0.851759820050649	0.726853675390973	0.840546231650388	0.844497678304112	0.829716262651869	0.877566989861469	0.783805087123272	0.840885854279204	0.759250261156078	0.82751014526581	0.826751040315604	0.828636304305423	0.86087433790948	0.821805102740003	0.832508734265421	0.752648522945402	0.83958353879196	0.838612834570116	0.842190848310491	0.898229953619638	0.793378833418085	0.834322653979611	0.74991535564205	0.845139720608075	0.852909471591605	0.852111964369057	0.8877054351522	0.81259110633365	0.839444641179278	0.710697032720651	0.836556183751203	0.84564679293315	0.842276946547456	0.867064976708055	0.786925827335355	0.833264160368446	0.749534862746123	0.820185328145454	0.81499718771753	0.841772233614668
K0036273BCN	0.860163097783209	0.883867030614502	0.848665469228699	0.755834373553098	0.831974577641467	0.844624987991883	0.829771814780563	0.812415730677316	0.865544259326479	0.834077807988701	0.721535515602284	0.825289164663551	0.825595037083829	0.835870626496225	0.86747193636862	0.876057627563323	0.846633808898466	0.736240473289783	0.819576753591809	0.82518318275073	0.833718331570405	0.823755250640465	0.868786745590701	0.832125844278933	0.743759473676856	0.821200135020716	0.819456672021338	0.83018776803138	0.83350658977964	0.868924001133312	0.856648169944937	0.726144055026773	0.853309870651871	0.842408977214637	0.83727894687129	0.820433271045283	0.859864522873997	0.870390412108768	0.696686085460326	0.80035402193576	0.808713145923898	0.819265711903048	0.76264698411645	0.857540616279123	0.822829368364279	0.720478476028436	0.813780264790655	0.812429145075953	0.820172651877329
K0036273CN	0.847554670265647	0.819864517366072	0.847736846848447	0.845780216296042	0.825449231507053	0.834327054489281	0.818588887837565	0.815105151481094	0.828013920016524	0.875819534855321	0.815812448801104	0.841804991298979	0.83964647828506	0.83209894333364	0.844983062834655	0.795372582100431	0.851153870356518	0.834393593699441	0.826010100646722	0.822728414753566	0.82074736586943	0.826933426712604	0.816518029174979	0.852028959233382	0.828133651700507	0.834846850476405	0.839777527327067	0.823358078921045	0.831250864138602	0.831941437925547	0.861464587123459	0.829432271777242	0.872566625776103	0.850728108597558	0.840709616864979	0.81592322199156	0.840893293872143	0.84054063472631	0.799618791210839	0.828717100368579	0.833018746339046	0.838221318333768	0.792763112067723	0.803745179519578	0.845019884231605	0.812853293698107	0.819160426729878	0.82329464908694	0.834049133160853
K0036273UC	0.719008030441784	0.682018311923549	0.661856836864682	0.907547530586647	0.636438192111986	0.662434025118898	0.634998144410259	0.72624560960768	0.69882067749369	0.755079414491674	0.920359437652212	0.674259132858186	0.679820800901565	0.636820902587172	0.702433978252089	0.607451346633421	0.675106299031731	0.914226083329281	0.622144372734566	0.622056895311815	0.618258814545446	0.750045279720042	0.657855380934974	0.676760383648577	0.904376013690714	0.671823033198976	0.670961102007126	0.659153762005394	0.730673023655356	0.70864500480221	0.719052012500672	0.918727270188911	0.735225180522605	0.679085928859078	0.67506326607731	0.732058039721142	0.693953514814418	0.674632066805829	0.900962468576123	0.648319304956894	0.658705794595899	0.653151233033656	0.73590345957736	0.657452749137694	0.689689317387184	0.906778416554962	0.617585504775231	0.624388077507676	0.658394587041756
K0036273VF	0.841518673476378	0.835411473145715	0.900604064147098	0.717156092829959	0.901447527684107	0.900054231801433	0.894860082707634	0.830432042294573	0.818771400106297	0.865415901526526	0.664737008557688	0.88443972722703	0.891497370855085	0.889233816717348	0.86372882864911	0.824229167003793	0.89522137710052	0.701426034700339	0.889464152615426	0.894069180627053	0.888615248425559	0.8136358071729	0.841635135306644	0.887968423964805	0.69902841767319	0.89234373051193	0.89908877828708	0.882759540698622	0.837792693726826	0.806799679669813	0.869373414399599	0.686262940660375	0.890371964067239	0.898062388331912	0.898378475768358	0.82929952597734	0.83239225765958	0.851170841689299	0.650540518932759	0.88610271379668	0.885419888748806	0.894264050162328	0.794282453340436	0.809421765319668	0.877470960136128	0.677482836009044	0.890051462876179	0.88048123825634	0.890821394432088
K0036273VI	0.837123696554002	0.837311558659732	0.899602553935354	0.707612939083939	0.902214334978525	0.897377565610539	0.891713323633986	0.815872405977202	0.822424198257969	0.86660853407305	0.651192104714275	0.886053776998333	0.882248433242214	0.888488296005812	0.862548523355544	0.825032039768759	0.894453043291238	0.687220939356893	0.894156153990169	0.898035763194376	0.889854823716294	0.806607665521998	0.839912235328734	0.887613122352599	0.686171648421696	0.888734832285348	0.893729906710558	0.88748700158235	0.826360098446558	0.804854126721639	0.868920250992619	0.676534788825463	0.882842354950602	0.89994836750087	0.897161240138902	0.81299384405568	0.833829543063836	0.858531972882781	0.638414943560863	0.885886744048043	0.880481292776044	0.887333572436247	0.782218577605477	0.812143120277155	0.876373337994925	0.666503225862497	0.889681719819065	0.888943084585809	0.881873594600046
K0036273VM	0.835706759820288	0.826609917647792	0.902230649264573	0.725602156854706	0.902764193402512	0.90045171353493	0.895522316524592	0.829616020866347	0.812449133488123	0.861651518062664	0.664600950312073	0.88440297391361	0.886317945211913	0.888608896263487	0.859292223642216	0.808571803048153	0.877906599379262	0.714312816152434	0.879873359526541	0.887353619205772	0.882990685769773	0.807293345257775	0.833774981677121	0.892942246961846	0.703986195415114	0.893941932009985	0.897375706308317	0.893800025618441	0.835261614443256	0.796728107104659	0.857497047989655	0.686709079487176	0.884447970335023	0.893964664284242	0.904463940333361	0.826398679500031	0.820055912419522	0.856668820703918	0.648420270072386	0.891924761846614	0.889498633589544	0.893795895525495	0.795563955794537	0.800663707833189	0.869063051107001	0.686757307642936	0.883041815828144	0.877446424063132	0.892571863323704
K0036281AN	0.852538208109544	0.819582695873438	0.863747902341646	0.743861425425751	0.840331686856364	0.855354590220303	0.842233410547578	0.878472333942024	0.809845573469093	0.836448219237504	0.69897956953759	0.846434119024136	0.840331119815934	0.834212572163113	0.868825112552427	0.784285078072037	0.841149707147862	0.735121447346817	0.823404326024833	0.828714846600062	0.83266203107724	0.832291709533224	0.815680860435355	0.825608956715111	0.725165071260936	0.831791465722877	0.834810999103066	0.841178794953153	0.877282016914004	0.785313286489251	0.830103956394013	0.71367977457125	0.84241607866009	0.851752451289901	0.843794441302864	0.874020572124258	0.808514665211455	0.835257852002811	0.679819785412219	0.836411513001472	0.836842496075058	0.844218840462711	0.844629281124289	0.784638542786463	0.820460037421708	0.718849571868206	0.815515548268189	0.813299681351803	0.840649053584084
K0036281BCN	0.856397942278053	0.8924595612753	0.864473307626987	0.708863482240735	0.839641370246099	0.844528739436228	0.842001931336409	0.797478043552385	0.876398797492635	0.824717693633946	0.658145769938642	0.830311185125337	0.829442470218998	0.855196529844888	0.875366725426361	0.893381689183097	0.852214249087768	0.688038574902996	0.834330106926281	0.84158027993263	0.849784674495053	0.79899496950925	0.88338159702978	0.841703945303805	0.688732217125238	0.8237790122552	0.821957380324009	0.833428360327133	0.814616301575629	0.879326037002458	0.861406667502781	0.672068819143258	0.84466437128361	0.847077133868868	0.840087127620599	0.793353315871464	0.870538822638009	0.87604451574234	0.645105422070651	0.812804139297124	0.818373279308873	0.820307158891222	0.739105088727445	0.872247550697251	0.82950916027387	0.667991533887104	0.832402674060082	0.83720327773988	0.812380351084528
K0036281CN	0.835591243481851	0.837889193406156	0.880472766906966	0.758669894814395	0.8735438842598	0.879642703171854	0.870756787420974	0.811473237392135	0.829118336476957	0.871016380002491	0.707145821422403	0.865491036090987	0.87718730371108	0.868370841250405	0.856995264921445	0.822493597124749	0.887644141491255	0.745358591634882	0.874864747370027	0.87659334032929	0.869456290022075	0.78999279575646	0.830060729107159	0.876222668165626	0.73319032702456	0.872380395211686	0.8700174986007	0.862793806227959	0.819533444005574	0.816649949577273	0.864824534314767	0.729874945671862	0.877177931359897	0.872918703773103	0.877581293706171	0.810368751117769	0.829652110264049	0.858427933994457	0.700896387373253	0.864622835338153	0.871955377726386	0.8702021536337	0.778006792539985	0.806480894430478	0.870651071005646	0.720770840932657	0.865132857238897	0.866319072343577	0.863804085697564
K0036281UC	0.752567834707132	0.715182606141538	0.711886065353811	0.898628041848873	0.694016669969276	0.709603269137066	0.678010451584744	0.752839614275289	0.72655904194233	0.789145147692182	0.896673511501925	0.723218611387352	0.723971617865359	0.690737685797093	0.743305155364631	0.660568466168625	0.723923308041644	0.907175802467976	0.678685954216078	0.675759695736818	0.6684949697164	0.762800504034987	0.693273173594484	0.7153906691476	0.891973988065273	0.707447935794549	0.715670355832976	0.697443666720091	0.756369222218374	0.733358003888141	0.757635255821623	0.902815779174415	0.769999871099224	0.719603478190968	0.714930329621755	0.75807435981862	0.731155464162783	0.714215163763913	0.891518266242925	0.702050223401639	0.708589959661117	0.7005385080947	0.751429101139161	0.696733945870579	0.731241799615099	0.892330010130366	0.669147805873044	0.674776305141286	0.70150050916849
K0036281VF	0.827809615003935	0.818124108448897	0.890117365047056	0.696463580248915	0.89232752165058	0.893584247023106	0.887172487298378	0.807412498445602	0.804653637821464	0.843774811853994	0.633508357918292	0.876924674451982	0.879980788825329	0.873803287569779	0.854755816668569	0.816062741811413	0.883320009071389	0.677667430916183	0.885784376745917	0.894412757316116	0.888685376544667	0.783589622377613	0.821502557333305	0.875660820699516	0.681819863048425	0.880111244344903	0.879422828729548	0.873082843377137	0.826891705553854	0.780642927029138	0.847051387318368	0.658163910425375	0.864616415661034	0.883750059030776	0.886269682729912	0.816493725215158	0.808645727346445	0.844061472574364	0.632052577208957	0.875975517489246	0.885664593513274	0.87910513669835	0.773141566125437	0.788250434778254	0.871020619904655	0.660347857885564	0.871773678186726	0.879076196972363	0.875034943503271
K0036281VI	0.822618250351204	0.826910784119621	0.887855981536178	0.703011571547053	0.896217302552758	0.892056566367581	0.882903528722392	0.805950919809878	0.808313583828796	0.847403069219325	0.646149079876524	0.87059124568241	0.870735478256489	0.868270415527098	0.849667122234288	0.811667601376844	0.88032108868761	0.687531282736139	0.884328789382501	0.891245725273485	0.879574667991657	0.78659797102381	0.82328450466419	0.879237853224189	0.687062609625397	0.881004830127055	0.885148896450532	0.882936992624445	0.817905844298155	0.791044461542237	0.847579181125015	0.664049063673151	0.872758099502874	0.884885296294175	0.890155736571448	0.819473984262419	0.818288064699886	0.844316831630151	0.638193232985393	0.878871911717706	0.875802404387649	0.87977302147503	0.776146241176176	0.7908490095238	0.861125532722031	0.667047858497556	0.874568734018897	0.871759376125403	0.875880187697027
K0036281VM	0.833403476536856	0.821611284364621	0.887104574674229	0.717537357078873	0.892188129497447	0.891190127160473	0.889659209857869	0.826739360400729	0.807300037650924	0.856269547840047	0.655416218689045	0.878770878207037	0.875874010223257	0.868467613057706	0.860291540555165	0.810822548859364	0.880060645335493	0.705574568136254	0.878933262520409	0.88174947148352	0.887823158299408	0.795398381468128	0.814490268363337	0.87801951520143	0.695697920778736	0.879185714408419	0.884281141752347	0.876957720919943	0.821341466148199	0.784788323525826	0.851805428341556	0.6813102851198	0.870686894712465	0.887750022397196	0.886170041457529	0.828312030523637	0.804762361507017	0.849051885683257	0.655689378542591	0.876541872645509	0.88279382878362	0.880854907158363	0.793022540798231	0.794229526398898	0.857391445578767	0.68472438520615	0.873725218565435	0.873714554479951	0.881810385724916
K0036296AN	0.83640593816392	0.787367633547681	0.826916258900025	0.777866498354334	0.815445079416334	0.824685723160538	0.798378114258908	0.885487383097706	0.787518226580594	0.82335497501085	0.733632014509213	0.822209249460883	0.821794431344019	0.797819515373233	0.862212121426437	0.744182190876097	0.807895531061023	0.764014322091114	0.790969605122878	0.792515516580776	0.795324580964546	0.85351410384015	0.780337631417783	0.801457371959775	0.75661208577879	0.810816556187587	0.810434293952689	0.801035390918604	0.892720468456542	0.754103221951187	0.807196053002941	0.75063317629805	0.824274769442697	0.815858263576898	0.822997430189284	0.876333440235224	0.776477538927651	0.802219708832503	0.718777678506799	0.80632832304539	0.806431168164806	0.810386046390447	0.878341581063216	0.753263204781193	0.807919167724464	0.763812409976953	0.789359996129173	0.785222171876724	0.818896537255545
K0036296BCN	0.849305321260664	0.87939979119474	0.85771292100914	0.72397879157462	0.847702447785521	0.849783054608798	0.843953943562024	0.824602883120021	0.865604263593994	0.832023665194676	0.683028692738793	0.839083274502764	0.843342028838323	0.853383316391297	0.876125447337836	0.877052193541816	0.852542255421886	0.70767306168894	0.833577050889804	0.837809679497689	0.842886757328718	0.808454283816899	0.873823340854824	0.841852978707806	0.711296341516972	0.832670773298976	0.82779315634696	0.844237002730059	0.833958453647919	0.853601085581751	0.847816585447069	0.688518295206588	0.847211166139026	0.846123074180555	0.844970824483376	0.823724728051797	0.851655330028765	0.868150838378754	0.663893624169074	0.818889102055231	0.833952593652331	0.832555762578686	0.759357016395589	0.858727149812761	0.827178796565303	0.691156657182543	0.823908797936597	0.832959371793618	0.831275625269382
K0036296CN	0.850336206419422	0.836464998136199	0.895706660630279	0.76908987837609	0.886937049997573	0.888514234239342	0.874705093785239	0.833673635835645	0.826199070461733	0.87910341891654	0.716129929204528	0.881402571893994	0.873832605244767	0.876191771505676	0.866503502360537	0.823920670473398	0.884838434392459	0.747519440784421	0.880465429567284	0.885297336785949	0.876056159087987	0.817114289067316	0.837752409046039	0.882762112140745	0.745119746279036	0.873372584111417	0.879647473701372	0.872518522248495	0.841663317360304	0.816193018770442	0.868735242836787	0.738714139995533	0.887840100924082	0.884904022847756	0.889773225027124	0.833310301467613	0.83214559680893	0.85381905194983	0.704533684752487	0.871678325882531	0.880045573017202	0.884016660724545	0.797153886767843	0.814962798988558	0.869722531392476	0.7324380767123	0.87217752197963	0.868467345453237	0.876513383254477
K0036296UC	0.738061318322983	0.688539733515586	0.682627271338408	0.904003687323939	0.658333239177406	0.673508965797404	0.646025316251998	0.739176856170244	0.706288552640433	0.771050378069027	0.913851871865746	0.697062755809163	0.698494041286178	0.661797342736722	0.715708109257829	0.627543223106761	0.688418702684387	0.908677712194037	0.639421864930294	0.638268892718271	0.636327451153457	0.750578525796686	0.678255089806346	0.691713076141258	0.900793096766889	0.684722402482162	0.685134252919619	0.66808243306873	0.739570970055665	0.717711086821994	0.725825042955565	0.912327405536728	0.744026778279208	0.696379626166465	0.693221998631998	0.742463310259873	0.714519683552033	0.692620348239087	0.892934977951349	0.669142819742673	0.677763442055246	0.669628067886139	0.744096972505698	0.669252869317826	0.702383921202737	0.894456642353365	0.634913106312919	0.639672794168983	0.667603052185873
K0036296VF	0.840519824978625	0.830805217935488	0.899050469853034	0.728456314142099	0.90302877013811	0.903018970732278	0.88687424242915	0.834438437005146	0.819813989020008	0.870292484145131	0.672731356751913	0.888477250085475	0.890538871116127	0.879644270068119	0.869806433935197	0.818426325408366	0.890145713983027	0.713214581885479	0.887903440679156	0.895673512464125	0.891130182854003	0.813329228254369	0.840835969320838	0.885362343621212	0.707237575329842	0.889586939922716	0.895396934232029	0.880462596987756	0.84203444655175	0.802136019892419	0.863800749654225	0.694012485355198	0.884308590556291	0.895274335771068	0.899065675052709	0.840760678096037	0.831586094009822	0.849891874643874	0.664745257399457	0.888619582330969	0.89392137010202	0.888056257936847	0.809113781552055	0.812912013665988	0.875594446087027	0.697639521814536	0.882306822683043	0.885638047745239	0.893340109921909
K0036296VI	0.83415964262676	0.81836877640691	0.897092452313816	0.745455859653866	0.895213085118428	0.902509980571705	0.887723313157043	0.8417818017036	0.808544007318819	0.865665011880913	0.689266559431327	0.885259169729702	0.883934404271021	0.872610017998623	0.865153383299532	0.802094565917528	0.87917260385222	0.734182724882311	0.886119377784205	0.886639102249445	0.883602733888144	0.809084319679833	0.81775305546527	0.879918697306458	0.722833204643633	0.896207022296685	0.897026596101331	0.888733110043478	0.843623266333834	0.784669736087155	0.851595435448423	0.709920682062567	0.884323828839879	0.892798506784802	0.902394957997109	0.8431259315608	0.816623572129434	0.849627094290674	0.682289567608914	0.893522898705229	0.895008045964291	0.889546636424816	0.823448480385635	0.79756204117441	0.871632963038703	0.717525833884459	0.875048369077397	0.882706037719569	0.89644125359377
K0036296VM	0.841240206669753	0.824668757491557	0.890608974437505	0.758282769370781	0.892813728421751	0.895333118394986	0.880359611944969	0.843921314543861	0.810844367017338	0.878500625138303	0.705639849284459	0.880053653155927	0.87824022988598	0.868718048672729	0.861396441747147	0.796362021166361	0.879248826714026	0.742631653817434	0.874643636844611	0.871769617178594	0.874475098834099	0.817649821527783	0.821630231726068	0.881662310924259	0.730851410452806	0.88287070966478	0.890667565439451	0.881780309206422	0.844685886187755	0.79710000302074	0.854721340301473	0.720321057036961	0.882664488990421	0.889298867861624	0.894815488164084	0.848252871959463	0.816205333954596	0.848733717710421	0.690856095041989	0.878652591505159	0.890483800791641	0.886355086116758	0.824148633736043	0.796557611197915	0.864487394620641	0.727903974385404	0.866194435465925	0.867569847452648	0.891463267305477
K0036456AN	0.859590964154616	0.846035313786804	0.826525880563455	0.760986880938265	0.812346805599044	0.823944817999143	0.806354010184151	0.868766243556017	0.837176673500556	0.835330080260225	0.731070533125967	0.818982475454341	0.821915168000326	0.807806911191145	0.871955701862687	0.814015631649086	0.823157280082455	0.73898551833651	0.793845254470089	0.79843325098679	0.811456332681327	0.863291859021875	0.836154328016742	0.810480259835357	0.749079763595279	0.8136043736716	0.810014577633605	0.81230134548633	0.872394490582978	0.82061448089681	0.830488517811276	0.738878300576514	0.828958323943007	0.829445073256033	0.820319550741001	0.862119266461281	0.832717637331216	0.836273687202355	0.704600870542967	0.797502602431383	0.807463868360182	0.806745324160241	0.82415197534487	0.827124827992125	0.810107593991115	0.739527636232074	0.797128373562764	0.797246890609976	0.811381656390236
K0036456BCN	0.850791261543642	0.881361634391672	0.822808135857608	0.754672406151273	0.80221297751508	0.81645419432611	0.804837863319052	0.813267668720849	0.867162960882811	0.82067988673623	0.723591554974451	0.804767623087446	0.804174017669486	0.806672575130554	0.854509562241643	0.853558188028927	0.81557302588746	0.737839377512478	0.785584367535747	0.799049911148302	0.798054873137401	0.827527370531944	0.86429137055479	0.807460546485239	0.74650034616956	0.797038050796416	0.794018170147968	0.809834557147784	0.824223192671043	0.863657829972715	0.838310881581065	0.732342093656732	0.824506910086674	0.814722103294745	0.810453377510433	0.8070797862257	0.845240349921071	0.841270276573257	0.702926090381649	0.773491556024665	0.780284239626057	0.781859698966404	0.761521106068181	0.856807009190542	0.801157278119307	0.729071584278884	0.788965313988129	0.79469962915995	0.794785764755087
K0036456CN	0.837070671871146	0.823847048642123	0.889440472794368	0.715514430423811	0.889779360594537	0.884278334585116	0.875147762855255	0.817732995847188	0.810194814174729	0.863559525682117	0.656128889093682	0.866634616112261	0.880418991775144	0.873658120583523	0.853575096135703	0.819967798761036	0.886313760970955	0.697924470757064	0.878145572140628	0.888141022711661	0.879916723953873	0.792771516281588	0.829862938505471	0.878377695152113	0.691380125903878	0.871496355065888	0.874767992566225	0.87023173272642	0.829375675597037	0.793920698492905	0.858132676139326	0.684642572668151	0.87691435007617	0.886966154279353	0.887021989827984	0.816683573654032	0.817154787235701	0.850727811318214	0.648021246828233	0.867338661011172	0.873065561085088	0.88268303354891	0.774181841915334	0.797363242544397	0.872451192410994	0.675780224523867	0.870028528541466	0.877775903604179	0.881555749775726
K0036456UC	0.736203595264038	0.693242755842984	0.675074700026218	0.896054018342866	0.652186278530807	0.673928606420084	0.641744539017087	0.736131549982405	0.713362243957142	0.772535365793931	0.906155974053551	0.686913244076433	0.689481155387384	0.658332193920447	0.715729287122283	0.63779349128467	0.699459491066614	0.902756329404738	0.643113300361713	0.643561147604757	0.634900346480887	0.759083651423507	0.682790538086762	0.693581765705131	0.892401215985315	0.682219681338019	0.681229563277682	0.664466832650848	0.743715583128144	0.729965245719327	0.729644329013208	0.907938017970921	0.753110508999784	0.694259868473627	0.688355360433079	0.737605905316513	0.717606345394551	0.691175570115772	0.895852684525812	0.662275231606911	0.66771731441356	0.668101310399181	0.737440724324463	0.674872089851662	0.707522209033966	0.89433751360402	0.633799877799665	0.643557984497774	0.665792152649341
K0036456VF	0.81711229059915	0.808537630221177	0.88835524092881	0.703597556871912	0.894506099649978	0.890905225437721	0.876109213075737	0.828212494386349	0.794036283228312	0.858859747510973	0.644121788411633	0.881255713416394	0.885549868077279	0.877460923674382	0.850945398081332	0.801292025403033	0.879105151460011	0.695932423928771	0.882334886024227	0.886822946842518	0.888298019590874	0.789193415173918	0.817448987328082	0.885651071705806	0.680527337776134	0.886124159922948	0.889344548207853	0.887086662621934	0.827720258893595	0.770447249897472	0.847516785565552	0.666801659719779	0.870807581781001	0.890487822853395	0.894400515418272	0.821218117417876	0.810175063154744	0.844518669185742	0.636644208221717	0.889274910531022	0.885191416313179	0.889553431241407	0.791350502445258	0.781815922100015	0.871478165964115	0.670141614787826	0.873109931228996	0.876190392241162	0.892122106540987
K0036456VI	0.822556773550249	0.815865796346855	0.897100855872542	0.701691376455682	0.901671482929166	0.899439460408993	0.894350326988362	0.817232065192423	0.795131021508611	0.855713694604232	0.649896289022348	0.883580120157849	0.886650652118721	0.882447235604009	0.856250705526535	0.806345421198779	0.88412269137419	0.690650188681152	0.887492163466778	0.89295399765462	0.884066177096817	0.795744933167509	0.819691823116207	0.889763160768623	0.682375904926039	0.896287447122456	0.900817857686821	0.893555351634411	0.830253730558964	0.779329406465633	0.849198232795754	0.665059842014439	0.875319696407469	0.894000620925309	0.903596813054649	0.821907634738518	0.807557659411502	0.848228906192784	0.634765639053724	0.90012679146415	0.891470583294459	0.898455348361828	0.788711117653684	0.787030725492567	0.871247804773731	0.667555212570427	0.884938592815947	0.881714925595008	0.891604819252441
K0036456VM	0.833580161466092	0.83625102074305	0.899206757521059	0.700348153954913	0.894854987356834	0.891012715050589	0.887289092754612	0.823455094494005	0.818573822929239	0.858923687711274	0.638559731279672	0.879034377192411	0.880228225008522	0.886215880322118	0.862349811363615	0.834421821014638	0.894665541600811	0.684613922490739	0.883038642428817	0.897216520500495	0.893716106256873	0.800765658320152	0.84068692145421	0.881654981981461	0.677177098545764	0.878780980097432	0.882313518527374	0.886768732269771	0.830153126414031	0.80274719019163	0.863706867162283	0.664567219558406	0.877329964294105	0.89559840958448	0.896655925678163	0.821498665304867	0.831186076060011	0.866379847144772	0.629094764993348	0.88002171852525	0.878801194654631	0.889636722004158	0.781528464709872	0.803989709322435	0.871311689066581	0.660267358771249	0.877662968186671	0.883285911408106	0.884918798094448
K0036495AN	0.845161903262232	0.803650471013527	0.84358137887519	0.78148409943821	0.825751510596061	0.842838347684272	0.817223148695218	0.902153661729054	0.802448565519044	0.841589447303259	0.741754468532175	0.841258818175969	0.833846299311294	0.820358365123529	0.867917894265156	0.76456880177673	0.827605380798414	0.770307312062984	0.807230348848168	0.810040769207403	0.816239252529348	0.855760413696051	0.800738046185676	0.83045744763869	0.763721250234219	0.840040753874906	0.838809459007275	0.829743013868819	0.890847493363614	0.776844077922434	0.822536213813431	0.761061459084308	0.83729217502879	0.833583626109105	0.84013950658512	0.886326719132945	0.798018947933057	0.817535195423037	0.730741120587383	0.825470812221689	0.834193324191905	0.834224895168628	0.872993259622184	0.775140472126146	0.825527203197418	0.764891482134035	0.813619064457052	0.808771963728819	0.842912931562287
K0036495BCN	0.854826223404759	0.894477447782526	0.829816068211157	0.764898235352737	0.809608599775172	0.81975225434824	0.805949465334786	0.811436515734966	0.879123452342622	0.835327541591805	0.736847203661675	0.810461208409718	0.81250700641132	0.808405223593456	0.862994668768504	0.875076966466275	0.82781766054282	0.745086602937794	0.797350657689968	0.808682129192498	0.811198709117537	0.834295065767945	0.87768195239446	0.82057674286329	0.74412063704788	0.808736895635976	0.80579782877189	0.814957901822826	0.823475245631854	0.882209834913985	0.844394253995286	0.736129513548048	0.838682274023214	0.826496537342831	0.816761790163046	0.818338318777429	0.858683350605209	0.853399726907463	0.71374613991486	0.776265277153837	0.784501223663939	0.794850715862017	0.751737446008226	0.874330757072395	0.804837617613874	0.728759871501852	0.793284239097381	0.803818734634426	0.798081033573736
K0036495CN	0.827709826063568	0.806171631593779	0.874242537341906	0.745262968458846	0.872595730149657	0.870801725300962	0.860610280065509	0.810954449452074	0.803582921251211	0.860743998058086	0.698835867266617	0.873585361035749	0.874786016228759	0.868365806596976	0.847334966400873	0.8031417440428	0.878961969408773	0.737569245183982	0.875901381611795	0.880682506808152	0.861343172240307	0.790787195859584	0.811734580201881	0.876643272978037	0.73071386361095	0.866138656613708	0.878749396729764	0.85674748703352	0.818001422884254	0.779071520887047	0.862864408701444	0.719494060625189	0.876028600409237	0.876332332218214	0.884877053076454	0.814275044763397	0.816570243399651	0.83368954787139	0.696120145086094	0.870974164912286	0.872135829371079	0.876247013764215	0.783969156685416	0.776750312390518	0.864832924230929	0.719389794327106	0.865899671540932	0.863068428932327	0.870896352098434
K0036495UC	0.74735719057164	0.72277061044398	0.687184169980816	0.896993773074023	0.666667158965198	0.688446894332223	0.662868008494821	0.736156011621072	0.73587597126519	0.779294092400116	0.91829502409501	0.699546982134522	0.699632126246339	0.670621806362514	0.732919887267516	0.662722133676747	0.701044167273896	0.906760748002947	0.652847462614719	0.654986869355309	0.644503858601223	0.757339108995651	0.694279482937447	0.705717958245777	0.899378367223532	0.697707358999399	0.698590598447405	0.684720549589543	0.73956419029352	0.747042188773075	0.739645371577268	0.909512328962199	0.757246390336308	0.704136630293659	0.699659334274492	0.749949911219963	0.732970298901876	0.706791448067511	0.894732669388186	0.673333633856319	0.680883231873936	0.675974330216736	0.730676773825488	0.695991227463225	0.717048969561051	0.886387564119649	0.64881902201701	0.652864348365815	0.678337456602212
K0036495VF	0.822647987869932	0.816793099486517	0.891374269886682	0.706452011978247	0.898673429417978	0.896039193086354	0.883006110339589	0.810235243365645	0.801056494526456	0.860618511471473	0.646714254514678	0.878660936926867	0.884063958617758	0.883095604595092	0.851092869736979	0.812584173540917	0.890471317477521	0.690880600587615	0.885219562829416	0.899071656636345	0.891903070629014	0.788583988355321	0.820138588413001	0.884683583001151	0.678952272873472	0.8865986261011	0.889539667186954	0.882586215843278	0.8199207453276	0.781531438362209	0.858972973467545	0.672622754740433	0.874164589561841	0.891222594875453	0.894309921634283	0.817236363283072	0.816256035234944	0.847016040881063	0.64116720491338	0.88946298635806	0.886752700607734	0.89605941524597	0.778945118115222	0.789590511640255	0.879753514167119	0.667513165683708	0.889700791727223	0.877118218146572	0.884575529826997
K0036495VI	0.826194014046327	0.816279173046579	0.896142296347848	0.724271704398543	0.898697953643718	0.895345435158738	0.888300194892943	0.826417758915727	0.808177562552232	0.864839451258124	0.667007744622368	0.882154321638099	0.890805301056357	0.885709316213964	0.859371182451275	0.800043991713201	0.885810603590846	0.712171984129279	0.888336849435525	0.891351575564805	0.888777827766169	0.795669306748129	0.818080030825191	0.892417148616861	0.699289722263996	0.891566947247771	0.895017695339369	0.891549757829626	0.836912733319336	0.782810164569436	0.857367722435726	0.685040925822314	0.878762246991664	0.894954624871596	0.901761526474787	0.828686622698144	0.81347106405281	0.846246485662294	0.654766847041499	0.896340955180779	0.893601216935999	0.895443463105508	0.801839332387281	0.784710023641555	0.876070706495977	0.686837837794242	0.878295396973753	0.88123243330118	0.893225900514053
K0036495VM	0.818230604568565	0.807499566692407	0.893970501422076	0.697643680811873	0.894209554403121	0.89429484690482	0.889132590243092	0.81375954954336	0.787230117662067	0.852081985584952	0.63675309919555	0.880226931459012	0.882093477170856	0.874164695365134	0.847834846728842	0.799633578985739	0.884989605421462	0.689007491548429	0.884721650155948	0.89078915127704	0.883679879758355	0.777817938596177	0.808777961428214	0.880256325810844	0.675141170272695	0.881346860141795	0.891508520732318	0.882218548198361	0.826945625991737	0.771655290390828	0.851978825843477	0.661350208291048	0.871862734908467	0.889383324990786	0.894869642741463	0.820577600789263	0.805623826079975	0.837645437430237	0.634329850583556	0.891202505221086	0.889021141170536	0.894256654126031	0.7809231723875	0.77936348065211	0.867124617013954	0.662079722258633	0.879810494253014	0.877131086096243	0.885556915737271
K0037997AN	0.859245931002409	0.836927743236031	0.845668614301467	0.766823634463537	0.831612707982028	0.841768567563363	0.822338533510348	0.878424787271414	0.817710894699408	0.826179083159656	0.715632738457458	0.825471001088118	0.829800449208868	0.810860685042838	0.875547567011037	0.792383737215601	0.825856804114401	0.734471565752962	0.806357823249566	0.809093831813874	0.818447958241621	0.857573681143712	0.812411146391915	0.826079444371151	0.736629335028451	0.829581234164696	0.825499826887676	0.823644648860342	0.884896042327573	0.799339612222622	0.823978056186329	0.731103511442267	0.84033593877103	0.838143686666431	0.8375242851831	0.880954872767207	0.810178278106663	0.822874511416547	0.70590804737248	0.81445464310374	0.810132051222421	0.820999225876842	0.840455645154489	0.793749986015426	0.815236894128042	0.740199110816838	0.813093095657462	0.80445579599012	0.835577831017662
K0037997BCN	0.845113322223817	0.88601479435082	0.822192332511866	0.759973505789309	0.81169580909894	0.813697566085608	0.809870927230745	0.793706102445469	0.86932127986161	0.824812537747043	0.730749076760734	0.800792443009579	0.801680422542516	0.803158555836746	0.856886058805823	0.87149327453927	0.821606683148233	0.738449556301891	0.791149605701162	0.799762502380229	0.801326013698709	0.809257746746619	0.860619022227893	0.809728028380353	0.738092661599367	0.802121242693001	0.794149709879609	0.807379158512919	0.809387937348233	0.879633630518858	0.841935529996318	0.726030414180753	0.838557625941376	0.819019857970643	0.817183933116215	0.801465419460329	0.847960126310344	0.845331030876013	0.717034497801112	0.769801883370981	0.782799504125536	0.790049106379763	0.734819651691451	0.858920891763264	0.807101888488394	0.72590568553002	0.792197131115288	0.794578883198241	0.791397538398948
K0037997CN	0.839298743479143	0.827788307828371	0.892467232234245	0.722351038056659	0.886707828834555	0.890726112169115	0.87863148501291	0.8164970648531	0.816884748899265	0.858709799130622	0.665134232207818	0.860838002682223	0.874974978532469	0.864625450916921	0.860484669096152	0.825105670822248	0.879447929649418	0.704022299005635	0.871388574137007	0.880412916858646	0.872667625499896	0.804174620332303	0.83445980961549	0.870900502943141	0.700436075403228	0.868321791105331	0.86696944234167	0.871848264927268	0.828729688781051	0.807231488822857	0.866943359532856	0.695562474417692	0.873345384386187	0.883511816695608	0.883960551035361	0.82016495498393	0.82799236309233	0.860414028294736	0.667556947778697	0.86822330425007	0.866188141873672	0.872706925888735	0.778125292625529	0.806500721448094	0.872212133329423	0.68834639215184	0.868793568392268	0.869255754394565	0.875092016302144
K0037997UC	0.761370536864755	0.732222177001024	0.721113106925516	0.89256070984459	0.701239462666836	0.722815540740072	0.691344730205777	0.761343321300841	0.738662500455077	0.786411871669017	0.885624458973196	0.725006267229194	0.724435375179242	0.6892092672368	0.74902120025491	0.668744469330064	0.720951092710004	0.894561831354005	0.677095411105331	0.679056066946002	0.674400985965661	0.779623717956344	0.713276348706386	0.722643614907034	0.880222155232628	0.721620216964004	0.724342627620034	0.715924391404511	0.777209924484925	0.743136816850562	0.757905014875248	0.892948560844513	0.775696740653627	0.730215719242536	0.731517038855713	0.781247902986471	0.736898072646073	0.72511896090968	0.877874248505229	0.70021778998861	0.704338757275233	0.702133760177199	0.77278350910296	0.6988149785833	0.734239283894059	0.886174378655615	0.67305694419255	0.675993126764113	0.70678014076497
K0037997VF	0.845707381771684	0.824078513704202	0.903326573295885	0.743740193288763	0.900618979209519	0.899249743027912	0.888244735005902	0.836151627262748	0.814830298892706	0.863577767412632	0.679925097922236	0.880665794504772	0.881348236093635	0.873762346772854	0.868257270256479	0.810834904362053	0.88585422643917	0.723675025397732	0.876314085040971	0.889583998183968	0.880313961577757	0.813403948113439	0.827587719437272	0.88297246434245	0.715800769091583	0.883432961163499	0.88867802223322	0.887636426101072	0.849573245091986	0.794206199894296	0.864172213530322	0.706008823141402	0.876485428427936	0.895040288459502	0.894287576512565	0.84237226089725	0.819292260587329	0.857694610611076	0.672297615275654	0.882103406644591	0.889020551549049	0.888879435122206	0.80796529771537	0.801207900878118	0.875696222832427	0.706954470428542	0.87787398517187	0.872953364106193	0.887688472321626
K0037997VI	0.829088342697589	0.811768560292747	0.898485755220033	0.711480189955506	0.899544203637757	0.896288649773678	0.886098550171766	0.817184331661575	0.796181539122662	0.849551829277304	0.643697269119302	0.87078415583039	0.871611917506624	0.867262268723394	0.852843703064294	0.798263321931427	0.877678111171692	0.695164701855542	0.877037579479704	0.882474187406899	0.882002211732896	0.796382341543985	0.81038937580766	0.878759593363001	0.679283770222482	0.879926397176033	0.884180979640561	0.877531239890313	0.835120778837944	0.77783229752211	0.848577582146043	0.670675075096511	0.865370114305909	0.888064373584755	0.894495527718747	0.823281479978074	0.803732308226565	0.843596464750285	0.637807019486777	0.88043724093175	0.878154009303907	0.886440566154386	0.788636788966061	0.784510836995468	0.872651638941813	0.673304801942881	0.875200257787228	0.872810604237303	0.887991058505131
K0037997VM	0.818443033504803	0.799400339698865	0.896592105030406	0.685824838410337	0.889875487309174	0.887609489468132	0.884518192075439	0.810551001939559	0.776321070970579	0.836599660760511	0.608886494861763	0.869893115715784	0.873873181464728	0.871556710778405	0.846174119428341	0.803250640470347	0.882107531296011	0.663061188824271	0.885434130631287	0.88325355374283	0.880764214869308	0.773441195076078	0.802071326793137	0.870285738428125	0.654734472497031	0.871188796705795	0.879517399384469	0.872417261635246	0.824817877465203	0.761239522537154	0.836220713239963	0.643219586571346	0.858979138103839	0.875834618041628	0.883203657024166	0.806872249776449	0.799288237136976	0.835411342624071	0.61586765193416	0.875864278883415	0.875110140364051	0.885884208739914	0.780064236622902	0.776822675771003	0.863643842759765	0.642535480615238	0.874128456569084	0.869014453221467	0.881826899701885
K0038033AN	0.846659949747761	0.812142175215475	0.835468282043367	0.767743105764781	0.818228215973283	0.829006900179089	0.812786340640575	0.884934856399932	0.793385222251755	0.822863023828075	0.728074529467061	0.823738782166457	0.817201424001534	0.802544169711474	0.86412251399426	0.764183694044311	0.817020178640346	0.751790984211088	0.795756249849102	0.801462074886435	0.798883085940138	0.853902138727496	0.799698825664366	0.815310677856693	0.745164121345432	0.819861763190548	0.820671100400428	0.824685746205191	0.890865234097304	0.783204251509246	0.81972031825139	0.738501685105679	0.829871872568802	0.82379647452533	0.832628708255086	0.880680629678483	0.790293332674651	0.8191832805521	0.708620611950925	0.801508200203788	0.81124236457129	0.812610467387534	0.849076188208317	0.776947920659129	0.80492739640124	0.745038062858172	0.792679129222891	0.793181222886683	0.82574394144597
K0038033BCN	0.860169474056153	0.894239059670206	0.864317612647715	0.756267740454556	0.844031974040267	0.854177764411457	0.850683525581552	0.80990678460285	0.864690880184553	0.829934879232717	0.704578488274123	0.826304853889664	0.832488255766057	0.84349484226267	0.876379439685377	0.888173474786655	0.85311425342633	0.730591302516357	0.821218981024984	0.84192297533596	0.844453671015424	0.816195106564197	0.87989424614079	0.840622161117882	0.730562857894976	0.827226404465281	0.829103225628182	0.848981532642132	0.838643271464106	0.870260235568326	0.863263894201133	0.709822303774743	0.854994099764847	0.851304213569809	0.852798737212866	0.825760053498604	0.858534154052908	0.881727062734379	0.685534982141583	0.812769949331585	0.823264335895851	0.821189557563219	0.756079091671059	0.86737043696705	0.833780887928286	0.712237621007469	0.824198114466819	0.834224998160694	0.830417319343617
K0038033CN	0.839311630716604	0.828140831781286	0.900365827015975	0.750016547266497	0.890663185699753	0.896639225812163	0.885916327092873	0.826134882363617	0.818545018916982	0.870073932431059	0.688385844359849	0.879242546970092	0.876763272590531	0.870802512405888	0.86361009473197	0.818966889104425	0.887987931385504	0.733157924188123	0.879344693448488	0.886160492483827	0.884374424851734	0.808265652746852	0.827155524579186	0.883231342380729	0.72287098972368	0.88115925699769	0.888989340940028	0.879790286411594	0.837620087948162	0.812065094456087	0.870969155559732	0.718269019338239	0.884158274546012	0.887591235219053	0.891485857844991	0.822775768946961	0.840345679155712	0.85598789316495	0.68132557766078	0.880089694213936	0.884074358459137	0.88330896074717	0.79886922358716	0.807991935893183	0.871717562392825	0.709038398763014	0.875424444261255	0.868425690894157	0.875122238116992
K0038033UC	0.691107023707799	0.64584409673787	0.631613965229136	0.90136498447952	0.612003493688797	0.634619946716082	0.606271252433365	0.691322419519651	0.666687887030337	0.732341498800885	0.910436098173401	0.642803346713895	0.645965085377336	0.602663021590386	0.669873580544851	0.574800125321022	0.645698553704075	0.908786956129792	0.59288551978035	0.597285593604203	0.585357441601293	0.718789783191407	0.622044483286888	0.654351435696376	0.892374576263429	0.644656778520416	0.644410163204478	0.628460630510332	0.699068341878048	0.676748366913574	0.688404513737954	0.913879863638413	0.70972789135224	0.648244673188043	0.648880985074244	0.698930814395016	0.663851836276149	0.641043049703018	0.89726606111336	0.619448684854186	0.628538870925635	0.626043268571762	0.702883952555724	0.624588103962223	0.667542546480031	0.899667875941586	0.595343433800398	0.604562464784209	0.631847584136181
K0038033VF	0.828836336250752	0.825408590233904	0.892616511063973	0.723861762924249	0.892483695448625	0.884901410491807	0.87639933695687	0.803101677894444	0.814354366848046	0.859862330319062	0.666074654345716	0.876589068297526	0.874253581390874	0.874259827286466	0.850521262683505	0.81528114923084	0.880427529698093	0.709273140570254	0.880177820813542	0.883592009314576	0.878326807858654	0.788855017876708	0.82912907616735	0.872086215963435	0.701894019809295	0.873907686464393	0.869920805916347	0.871092352720027	0.814758250090282	0.808097295071762	0.868251101988277	0.687920942664233	0.88024532176324	0.882639919582339	0.885592289930087	0.80470779324589	0.823671979850376	0.837834062869051	0.658453884790955	0.874578741649477	0.864565097233514	0.870520242876069	0.765454163814836	0.804166758472674	0.859539827598455	0.684125486815527	0.874047029464289	0.865887246186389	0.871879654911686
K0038033VI	0.830539992033858	0.830284556003324	0.8917050686459	0.750350246143006	0.889601043766842	0.897828986950056	0.890746454187503	0.82883691047516	0.814247543495725	0.87096092335352	0.692542811882358	0.871512250258411	0.876019268907596	0.870942149579698	0.854956906133627	0.802786473763644	0.880002745053316	0.737935089292091	0.8685997205666	0.879178595255735	0.871727159891071	0.81146295464116	0.825109718063522	0.892542848248567	0.717555326624096	0.883469168696153	0.887502089901553	0.888469492084298	0.839316632762284	0.801862270778178	0.860736884242241	0.709498147272621	0.88779201525395	0.894863269081667	0.897469943948166	0.831328823648203	0.82587154715291	0.853523276363837	0.675702960243837	0.873010987960363	0.875619381051514	0.880082134260761	0.812458883196483	0.795815667925276	0.862952483200863	0.70925119328113	0.867445976067188	0.870335621055377	0.886942379686059
K0038033VM	0.842734754621397	0.83102811248591	0.90080907894395	0.729993413622739	0.900027938976269	0.900180843996478	0.889469651017472	0.829030926948745	0.811807684538626	0.861243669370373	0.667899118273023	0.879920689812425	0.881136356674469	0.888025464004657	0.858545561483298	0.823956994897171	0.8792313285108	0.711304369400835	0.875697367395593	0.885907669361171	0.878895313393888	0.803618092267322	0.838136414173875	0.885100602619625	0.706085379223174	0.888049741722685	0.889328566852127	0.881250398674108	0.834430321604048	0.809129052236245	0.866654817282803	0.69086163009536	0.878534524671342	0.893098725520746	0.890638011256257	0.818838347986753	0.831865991284823	0.847377351932465	0.655115478616559	0.878855459106837	0.883242027610218	0.887051460004874	0.78714053297387	0.802434977841506	0.872351505489112	0.689245421932461	0.874089203651276	0.875987951791578	0.87745843137736
HK0031819AN	0.855713610453094	0.815194197544388	0.840048384129763	0.808170149038276	0.825939798948504	0.839398990548138	0.822062855893335	0.867155200077347	0.809303335049997	0.838926795515959	0.758895068791075	0.823897781789942	0.829182209283699	0.810247411992815	0.869828002173923	0.780653029737895	0.828442689618672	0.790464685865327	0.799972666268967	0.814219358980424	0.80536597060039	0.840994991123947	0.799196939836184	0.817124894982764	0.787615457941618	0.815538436348349	0.81901949027039	0.822265021779205	0.883618653483575	0.786255281778598	0.827001789675887	0.773712274825203	0.839667693141772	0.837576886000246	0.837757435703918	0.86622045722399	0.808187991079285	0.82695995810539	0.750316684061433	0.821240070550177	0.820809528973317	0.82433227521377	0.844023554978529	0.781740027907436	0.817745432752079	0.78406503249175	0.798049835786716	0.798183489413161	0.824892327792031
HK0031819BCN	0.855417228983426	0.899476295523268	0.826293026433488	0.774057742760851	0.808830192613788	0.822271404359802	0.803436855212818	0.79173701634036	0.880525930962937	0.828603391729324	0.747724531875795	0.807334270344322	0.81077961072996	0.809565348035153	0.867622243008005	0.880122420858647	0.827314029300785	0.757489715514738	0.791925257922818	0.802402277319683	0.806147322803401	0.815726538549542	0.873405592669801	0.815283935949214	0.757455082936977	0.802286395452514	0.797544414715129	0.805598484262943	0.81388728503673	0.896543486272368	0.85081573675128	0.750491082129479	0.841290048064175	0.821610910057227	0.813572253606202	0.802838548318609	0.865870230266625	0.856501845425537	0.727610789436129	0.770873459947666	0.781211709843292	0.783095302482698	0.739700037224094	0.873478240055703	0.802828581575407	0.739680965459721	0.785133366092171	0.799998907180539	0.780730213269072
HK0031819CN	0.851379708330501	0.84507489714656	0.857594342049712	0.820084452031024	0.844059622794506	0.851924371456177	0.842357893430973	0.828554002499631	0.835867905145263	0.86346852532623	0.777038421923693	0.846634239167728	0.842185714083482	0.83685327320153	0.865410796507448	0.81775198173267	0.853322327376216	0.800728693693893	0.825902441515882	0.832565862980612	0.836267515458444	0.826519364574134	0.837158070973532	0.843187976068227	0.794138737967249	0.837311823352407	0.837935087846844	0.835669824236819	0.846113386778384	0.831980258861863	0.860649198947952	0.792924409724405	0.871339375409024	0.858517045058443	0.857327101649567	0.841151082691633	0.833536308420471	0.85497265414157	0.766882275602431	0.831975625587133	0.833925195114206	0.840402133733167	0.804218424185184	0.816076446676473	0.843189675584592	0.786704140723041	0.821741317529492	0.831181870029437	0.834805315499073
HK0031819UC	0.737746794285374	0.707462249875906	0.686562708156889	0.904579977554782	0.662862805578561	0.686249975767944	0.660666761932742	0.735119114525187	0.716132908056728	0.768340551770445	0.909189135959757	0.697164158692766	0.702080824732996	0.662766877659981	0.719368239098341	0.643308857548258	0.693190724167721	0.907267684473016	0.64336681189525	0.654283592085292	0.645120162540993	0.757250867724282	0.681246414256121	0.691726988533496	0.891469090666802	0.686557167257337	0.687477908349141	0.681864940959969	0.748523508912751	0.725330624639783	0.736379287179823	0.907809147305857	0.756303491753167	0.705710915586202	0.701352507286688	0.749427344097276	0.71981712249317	0.703021511755735	0.896648254212736	0.66858046147667	0.679371284974298	0.670585960839062	0.740369374339518	0.684621653497189	0.710773344375355	0.892935573077046	0.644301731812867	0.650596711881202	0.673396803961055
HK0031819VF	0.838459347010739	0.832725531886518	0.881295339724527	0.774010289296337	0.883920581081765	0.888067858894074	0.872599676107988	0.846082398692931	0.82089980170114	0.867109231223521	0.718905488828745	0.868813842011887	0.873331107073572	0.865650218100161	0.866985237300816	0.800120230258287	0.870329081114102	0.758196609910751	0.86273699313976	0.869757144493625	0.867174663546261	0.82050647316668	0.82484976836206	0.871776580650559	0.752533096724716	0.88536859251713	0.878595945958608	0.869063318215001	0.853396199493987	0.798101324628737	0.845441416188723	0.746329929723717	0.877583975747107	0.877614742563061	0.886279171030698	0.847978413987967	0.823183019233392	0.846857978660234	0.711488284631826	0.868383778076459	0.873253090781934	0.87976964151655	0.815822348235277	0.795986896771096	0.850983875528781	0.73784006088621	0.858828002788815	0.859137036825616	0.880306044827936
HK0031819VI	0.852750650686167	0.833633948087504	0.884923378552772	0.779238358739156	0.880979795689419	0.889007552572402	0.876439298926075	0.837026001687422	0.814980942686475	0.871149161173166	0.719833879852715	0.865951013387148	0.867002964715706	0.862120304942001	0.859864570012954	0.804292426400622	0.866150356805334	0.76529125190457	0.854293853088278	0.86285062340257	0.86197587560736	0.826313756401797	0.832974318173602	0.87748936847289	0.751817533641066	0.879969248393706	0.876716256475141	0.881895819770772	0.846451245034655	0.801454751054388	0.850965942887578	0.738853655746083	0.876844824850441	0.880202030819519	0.89070961070607	0.845092892708432	0.822225194232742	0.853526778857118	0.711616403624885	0.867869530705742	0.86928600142646	0.875157001262545	0.816742338173742	0.801812986135296	0.851804559389096	0.744270608623576	0.855413693650971	0.857503697193788	0.886516745395934
HK0031819VM	0.847327783269066	0.842312690360047	0.887888950647257	0.763725271587553	0.882592820799913	0.891179206238977	0.880840186269332	0.842796612836896	0.822210706743943	0.867716617860775	0.712171165234509	0.867893540102179	0.869601642519261	0.863476351521558	0.868128284622839	0.813157534672738	0.872409009371516	0.750385205076599	0.860924002117003	0.865797325176708	0.866571848277151	0.832828314102613	0.834474190610618	0.8772323930174	0.738627215203628	0.8748581826941	0.880673079294942	0.880437165707748	0.857911827872041	0.806180486077164	0.862332223072162	0.72841226368253	0.881205989678081	0.88492964890135	0.890231148876208	0.853126389595593	0.827950392950815	0.861489634328503	0.694755108315074	0.866292286167891	0.875035667510095	0.873784634827568	0.819421347003325	0.801861027391944	0.858711059768742	0.726713835594507	0.856881407165163	0.862076244808333	0.875067855547136
HK0031889AN	0.82474846689143	0.752306056284507	0.82634395779333	0.768784276136869	0.80523876238166	0.825533920075948	0.799712102204999	0.862730450589058	0.751107211195472	0.808251717312855	0.705591981127936	0.814386300728598	0.813122775412362	0.790215373202495	0.841134691516989	0.715333391623256	0.808526960390392	0.75084329072659	0.783325079426461	0.793874221966062	0.787901400650709	0.832167017231973	0.751318540446488	0.793750757838933	0.738175568397233	0.794124374538138	0.80360783953368	0.804074888640979	0.864030175817847	0.722930185087263	0.795177627120262	0.737789927658436	0.81159515341118	0.811701992019538	0.819622292017958	0.85628770667228	0.770334556726733	0.791986644833913	0.710329677033764	0.809459439264531	0.813294487745927	0.819974430741441	0.875551824401869	0.727656849998733	0.801684771324969	0.749209918639101	0.786450650922961	0.782040951233995	0.820805360119146
HK0031889BCN	0.857789406251186	0.884381295231299	0.854356527404466	0.72349972819671	0.840705803913165	0.849198554786926	0.839149916428331	0.79723814720163	0.859111761039292	0.828024936496211	0.676057162685449	0.818737063107303	0.825519999892656	0.844068654070343	0.871625215673925	0.881297801058676	0.854097244075371	0.701316942834579	0.818589476277134	0.83931592796959	0.838438215652848	0.800459966731768	0.867898101351314	0.830000617859439	0.703772742070708	0.824252152091457	0.81983361865384	0.840189768101049	0.828017341260072	0.856594662558201	0.854277985477113	0.690797739842934	0.838646239872628	0.838031458507381	0.840685212398391	0.808597124712329	0.854032974822276	0.866963350173231	0.663436252243246	0.802172653762604	0.81130977576643	0.817822152450337	0.742807639436509	0.856990091017529	0.82255691867765	0.679536225394892	0.818593328021969	0.826408236514583	0.819994912713377
HK0031889CN	0.85832087128879	0.840967956554413	0.902437793429961	0.76729728992525	0.899860046880694	0.903441252522937	0.886418231228418	0.849733902664036	0.836514552879424	0.876873219587623	0.71231117716471	0.889743004624817	0.88592050536737	0.880480193134511	0.88380961559755	0.822811374534864	0.894685500936749	0.751838147022687	0.879534140130071	0.890095904077372	0.885141345025318	0.826473601808827	0.842155506265136	0.885320630260238	0.745686478413114	0.884986649161182	0.895766263547096	0.88232257954567	0.860052065488885	0.810215545981597	0.870471686242891	0.740977059473989	0.88569477482213	0.900407155151631	0.899333101638165	0.853048941968535	0.832631441867906	0.868869845171011	0.707249533374899	0.885373329989745	0.886640056533419	0.889392181590551	0.823448940678878	0.817722260788642	0.878596883285478	0.736170888432594	0.878200667609952	0.876066351153549	0.886700034978868
HK0031889UC	0.739519349918036	0.711722170759121	0.683115798863622	0.900762922589685	0.66830799535256	0.689491268599737	0.661457931801566	0.729696367847985	0.726156376090903	0.771958134436286	0.908239455417841	0.695536928055275	0.694539880765276	0.667645783440103	0.732989099637464	0.655438974359258	0.708124148583845	0.906361339295988	0.644585817896135	0.650200258438546	0.648239479626382	0.759147485363226	0.690426013908736	0.69672904783494	0.894937817635847	0.685972537177717	0.681781446320907	0.676407533648517	0.73862828215236	0.742919102480219	0.750448385384615	0.912270984620711	0.761710379016783	0.703987690674103	0.697959796763274	0.73767220965921	0.722616033726562	0.704043027429546	0.896189211806506	0.668152974886943	0.674620930033828	0.674176526004314	0.725034449941605	0.69176118799186	0.71373008683201	0.890253847157357	0.647369995159076	0.651535483146359	0.669883813009383
HK0031889VF	0.851086596132741	0.833918877194974	0.896700348708126	0.74177187845972	0.896459090950783	0.896593493080702	0.883288942849428	0.827482164199074	0.827125236287801	0.862615765394342	0.679462041349709	0.879213551232975	0.87552915384425	0.878653585220757	0.875242798552866	0.819849738526696	0.895514739278017	0.72456713517017	0.880915499954204	0.890478214819118	0.888798791940021	0.804246085211147	0.834748122060883	0.880057794986099	0.713068071996989	0.876452468806485	0.87975972528246	0.879794231720401	0.845252100038944	0.805268251902047	0.86406536621403	0.709372823307233	0.881853493678441	0.885122321836398	0.893176619235167	0.828565617227924	0.833860315501051	0.856400375823071	0.676017750578098	0.87444316938385	0.879302788828468	0.886968866367593	0.796358416171335	0.808026220608005	0.874050578556697	0.70489371962503	0.870375344514234	0.879797257083624	0.87980079447602
HK0031889VI	0.842035224861852	0.839401202688977	0.893333623918624	0.754710032781596	0.89564055076052	0.90011468355424	0.886768769358995	0.852635331773795	0.820193476867527	0.86740647429394	0.694238857426621	0.882448202634508	0.879920913020769	0.872228480282494	0.869784257223659	0.80522807475279	0.886169872311134	0.740105840809844	0.870765401355071	0.880211232361764	0.876335338595341	0.824526440239091	0.834982696126627	0.88352933404161	0.728485727461294	0.88491993320847	0.888227745706767	0.898699830132376	0.85434394105009	0.801685941689651	0.851953294465393	0.717906931792858	0.885967347279957	0.896035551550677	0.898652822942079	0.851296716372137	0.816490520647106	0.854477275322846	0.683427222078896	0.881729498739979	0.884448445097006	0.885289759101818	0.831633708520669	0.798389943772821	0.864366783846578	0.725286629388163	0.863913362024874	0.865098617293108	0.894511314912518
HK0031889VM	0.85773427227694	0.842754273334831	0.900309103055949	0.746434838627666	0.899737657962712	0.90333708446887	0.894272440180752	0.850460025069095	0.818576337916053	0.864113998437023	0.683941115184005	0.88125083334167	0.878440972387361	0.878524239323407	0.880309243254336	0.816353297214014	0.889989685314553	0.726552029517051	0.877751911288051	0.886834051958103	0.886842238428559	0.823232062803226	0.831957779315588	0.879264490651502	0.715488337178236	0.890548152902917	0.884262691489815	0.886704960420356	0.852800088995706	0.802003780781718	0.853592165980114	0.706597064920737	0.882608362168046	0.897882467685923	0.899283145510835	0.852678959962442	0.819965366405929	0.859424759880374	0.677528174302895	0.885378237627756	0.883174180255398	0.888384548779005	0.823437005973119	0.811060684021882	0.867600496705352	0.704130393605329	0.877176781072813	0.877581301438608	0.895888680985496
HK0031938AN	0.823415321491114	0.761719898949202	0.822694362551373	0.79185900370581	0.805299338745003	0.827054895933885	0.800216212330853	0.873355913296053	0.757198972881456	0.81867745952916	0.744333403457922	0.807257675880127	0.805994834337695	0.785901822278337	0.844862627528316	0.707282076944855	0.806684669332611	0.777750521737814	0.778400538166272	0.785938948632238	0.780560104079111	0.854150644473357	0.753174144947115	0.794604283324768	0.761653583435157	0.807896796973709	0.813140103805296	0.808583199378266	0.878956933238558	0.729085574041698	0.795844945999481	0.767770466293742	0.820598089528322	0.814949807422851	0.819792743421702	0.874482279091405	0.754648412929592	0.786045404056641	0.729531226945924	0.798139227424726	0.799632941778156	0.810976965530855	0.884174871009955	0.727296906935895	0.790020837389261	0.775942429932175	0.77460245544099	0.771700389945925	0.818591135075739
HK0031938BCN	0.869219444233443	0.888000645469129	0.872194614363983	0.735776249481501	0.850955690544531	0.858307588295499	0.851797296134454	0.812626813358044	0.877426526039099	0.84059111832261	0.681005810133223	0.837227785871537	0.842985469461403	0.851263642130531	0.882187782371456	0.886470433220038	0.873363611585674	0.705164706708039	0.843566976768891	0.853362228151412	0.853439349661274	0.817253975465367	0.885787970707245	0.844007540604163	0.707143090114751	0.832941906371493	0.832857480015896	0.840034652773885	0.839325427716253	0.86734187644737	0.873092146423639	0.700143559499476	0.85589350785872	0.854775835460392	0.847801886729506	0.820969837769131	0.862908433982319	0.876135124936789	0.669260276176163	0.821715245233825	0.830639258842755	0.83356044506417	0.766704216802021	0.868212653243565	0.836423565596706	0.696003712415985	0.838145497529231	0.845628476871144	0.832575009961976
HK0031938CN	0.836704354436633	0.809122850150716	0.847164538145377	0.836899328208148	0.830792650929037	0.839186519901753	0.826316957515384	0.826137788697839	0.811587164756945	0.871894197731337	0.801191753665892	0.839351503018607	0.846281802003	0.831308516234151	0.847993733073692	0.783987832842683	0.864283656749009	0.834483642720884	0.827436126589751	0.8276913292605	0.819816282736993	0.815780467524323	0.806268080543203	0.843400679725344	0.816525046688818	0.834457706722574	0.841298844408171	0.830933593902004	0.835915875838488	0.803300646997025	0.860224837012463	0.822215293413758	0.870311193939433	0.846708836069	0.844999286637582	0.831106131509456	0.816000118718294	0.837833302452532	0.794577468397846	0.828686039586794	0.839192844706191	0.838605645175337	0.803327317564837	0.787565549899182	0.851851146759701	0.813392850699095	0.822011471071059	0.822728695679664	0.832822982645487
HK0031938UC	0.723114869051868	0.665139210328798	0.660080449804481	0.902965220898452	0.63887924005737	0.662446517607218	0.631045575096347	0.727072294041322	0.688103511137327	0.753966445588837	0.910273252429379	0.680812582915463	0.6766079432799	0.63646888408759	0.703988578724165	0.597889296712837	0.674777741069082	0.909474245458596	0.622063113896065	0.628557564401289	0.61684430406658	0.745070780341724	0.646914403308191	0.672288581206521	0.898747126585531	0.666027534450243	0.667845353032236	0.653290218346837	0.731470459056628	0.697041435735541	0.71209032204099	0.917523486415267	0.730882015019858	0.676150643070528	0.672267863390118	0.732999739045327	0.694552952379497	0.674068331183351	0.906023717871985	0.651667868326837	0.660442997925286	0.656156100813372	0.738893711164159	0.648765783817425	0.692992310404071	0.902738457079591	0.623397898780164	0.628283957653574	0.654689649732859
HK0031938VF	0.828353393024127	0.828770829108231	0.901704586999558	0.71352888065828	0.903753411430141	0.908318429660003	0.899263041194668	0.814620046931805	0.810079464535491	0.856143923744843	0.64371119661676	0.879499610870721	0.882084442188069	0.881548612297122	0.857629923080726	0.813850569029433	0.894672866331914	0.686838388879931	0.893505489624515	0.895912483705743	0.892570181112156	0.792755562837391	0.823069030132289	0.882673084005668	0.680703957812018	0.890994018412543	0.892713373819428	0.889238767527397	0.831176129066128	0.788769142521452	0.859236346177822	0.66661949141002	0.879707078466698	0.897460256015715	0.900698245827456	0.824726244268829	0.823051032071794	0.854982982924499	0.627606535119271	0.888477866881304	0.889563247903855	0.892725037259529	0.794477752929709	0.794775252887465	0.875087892980819	0.669393026041136	0.886378961078037	0.88375780990996	0.89717336864413
HK0031938VI	0.845004091699061	0.829151419961716	0.904219541336139	0.716416611184699	0.900103991018796	0.899077354180128	0.897978514939973	0.818636927020288	0.813736495441811	0.860200539024801	0.65146960602261	0.875678126552122	0.879320964531794	0.876855466043774	0.864194528584861	0.816081364694521	0.893004941861055	0.693018303077654	0.8837778436964	0.897481444053621	0.888873630408302	0.800380643255071	0.835559537725625	0.881028223822419	0.698199211732685	0.883614107630928	0.88898641546453	0.882759139425484	0.827539229690058	0.798223678992815	0.864019569401806	0.682220980375267	0.884525497630195	0.897154515368395	0.902721082531873	0.819935065348589	0.83272773836558	0.848493896333484	0.651348646390048	0.887886353459433	0.884616188851167	0.888410369200855	0.783830986375411	0.810885079479063	0.87394106305884	0.67577598904764	0.886592105308057	0.88995389108202	0.885507286085671
HK0031938VM	0.837702072076494	0.821464199163634	0.904113394376552	0.709714903473221	0.911291114049156	0.908821606289683	0.899719384891906	0.824865410533471	0.809457622073972	0.859874396805351	0.641487909318181	0.88873515080728	0.888299822668566	0.882191117230572	0.862882958715873	0.814952428294317	0.893873450469859	0.691425535728474	0.894499375311465	0.902663105853824	0.898076602330715	0.797547733373946	0.832717132698076	0.886784794275733	0.683622107532999	0.886835863620218	0.898711996308486	0.894831856311587	0.833222913862314	0.788632248522855	0.862775117620808	0.671522406594881	0.879111588202654	0.900298732228945	0.903459302807595	0.825017159403259	0.823105025989177	0.857552989312761	0.636625046042267	0.893958405726512	0.891323508312866	0.894659941720671	0.795463740095101	0.803236438678251	0.883205363083592	0.675444577445705	0.893158292990852	0.88840874604547	0.898314241004254
HK0032280AN	0.851248411986831	0.817416484446282	0.84443911078608	0.778321696049322	0.830197116760069	0.841698901361748	0.827154003553244	0.888307824282766	0.804661398951677	0.838006117116248	0.727357673621918	0.831706587811814	0.826717648460582	0.810833297242002	0.872871833282541	0.782590184267648	0.832441775631073	0.755281588884696	0.806516262468965	0.806844035436519	0.816489809393535	0.858114744914685	0.81558164395333	0.820875073593783	0.748110416982606	0.825685718691714	0.828445200689701	0.83448558227008	0.894785830857641	0.789456370487292	0.824493395989521	0.740820561193794	0.842384708964948	0.837108589485737	0.842414984037217	0.876071416208845	0.806798839612413	0.822438710375507	0.712966800798675	0.812328774537051	0.819075031044467	0.824459714537499	0.858749370888568	0.790391616407072	0.821206607869201	0.750230193042858	0.800671642082449	0.799314310782934	0.830396244573539
HK0032280BCN	0.869845000817317	0.892581879731623	0.868684681493048	0.770122052183198	0.851340652016516	0.857373290335353	0.84868935109119	0.827652637622223	0.877344407960916	0.852673049676811	0.724530575228512	0.844758212450899	0.844906568658938	0.844276522913835	0.880880884457084	0.879154961262273	0.859672507970026	0.748540325041145	0.831758111787661	0.837810146880603	0.847607507928383	0.829043214646275	0.884931057501428	0.84705170831724	0.753859470853605	0.836735894894338	0.838260949979427	0.848734010465012	0.849083353528607	0.872807665295444	0.859028908342587	0.734598472884436	0.859384335919396	0.856366260935643	0.858781939340578	0.829393379288702	0.869618551773171	0.873321309536184	0.712405975592537	0.819864325492312	0.826519141164308	0.834275519913396	0.776699386060963	0.867072959896439	0.835652898865552	0.733396162096119	0.822839750763718	0.835865085413221	0.833322703216017
HK0032280CN	0.861853762995458	0.855369706657502	0.89786569775003	0.790712716268374	0.88893103781718	0.889587195601375	0.882928638871684	0.82769773320177	0.843262337695067	0.880909730372475	0.733973321679107	0.877098864738282	0.88514714263066	0.879478946892185	0.878470805799032	0.834143818253118	0.895257283957228	0.768021317628827	0.877311902305704	0.886368504111428	0.872494361457712	0.820128575581723	0.850225081582292	0.887029290436646	0.764552787406789	0.876178705262857	0.879870616351621	0.877854007931936	0.853551324534568	0.836025165221146	0.882554046671243	0.762313180127237	0.899647539655011	0.892938117384406	0.891066125094928	0.840097527923001	0.853175146999236	0.87092594526428	0.721720902686153	0.871363430279188	0.874934334548109	0.879824578198256	0.801157512065872	0.826776380796072	0.86965914492758	0.749937272283922	0.86308887675138	0.869853825849591	0.8716730739964
HK0032280UC	0.778232510786002	0.74915460897726	0.733904288066734	0.908144180027215	0.710059399276214	0.727277988724655	0.704212035103694	0.766339196510408	0.763583340276454	0.806326777559483	0.907709518294475	0.737894920074501	0.734163553793787	0.708866249919703	0.771888669500598	0.690254382005365	0.741366129655945	0.907163213922851	0.687790354135605	0.693319015881865	0.687324973315117	0.786909649031614	0.726349368643676	0.73449455624564	0.892305979553758	0.725456941044976	0.730494581269663	0.712911089667468	0.783076918649043	0.768455227165626	0.781066368990829	0.911617064917771	0.789507699550706	0.741654631209271	0.738777657018877	0.777755768221941	0.754365603995493	0.74309537039461	0.89444123724986	0.710701180612581	0.718555406398561	0.714850571861819	0.760919646857639	0.724068032367708	0.743117025909043	0.890184285108621	0.686650207210376	0.688451525811633	0.706432335302993
HK0032280VF	0.856248832014043	0.857773973440852	0.90799646912202	0.750196033311388	0.908303797835218	0.907206726612945	0.897869735734665	0.835801840141936	0.841143541990391	0.877027632359277	0.694265127847587	0.895316366768785	0.894410683324687	0.886526441257367	0.88154045229365	0.83471674194446	0.895476752017825	0.734681434857324	0.885876333548855	0.89953517207097	0.89138221454617	0.817513235844708	0.850221470313478	0.896436319687078	0.728107752717247	0.898611127354889	0.904529794319654	0.896473850504311	0.852884772305959	0.824313022647186	0.878387388022429	0.722449092002746	0.902747529062192	0.905488751596374	0.9100874886392	0.84393128523785	0.844134731589411	0.86525788461921	0.687536700375514	0.890855167094649	0.886016988402807	0.893551045429	0.796516758022584	0.829253307244356	0.875972221355023	0.712512761609557	0.881677188826893	0.887910977341031	0.893669459894691
HK0032280VI	0.855063827385839	0.861402854917803	0.901047707817642	0.786093130170172	0.895771527630514	0.896505659307403	0.881125783033782	0.838477049099953	0.843257216817571	0.881552783407624	0.73092434238462	0.884159537111694	0.881676049916431	0.869031916908061	0.880876912081985	0.829702581479987	0.884651299032994	0.765365593790715	0.874415218029505	0.882434386074777	0.878192828887177	0.832806009450884	0.853523139374883	0.890234924290554	0.761931909303323	0.884058495447599	0.888462618064681	0.88788362829995	0.854426090961895	0.831813068237498	0.875397833256728	0.751386910377168	0.899776998951664	0.896920520328935	0.900288345864296	0.853735999322327	0.848110303447133	0.869597789998088	0.714222362832205	0.873132192305381	0.876924949523198	0.875772850422604	0.813515274630992	0.828159682026993	0.869362007746097	0.751768065159205	0.867843318154376	0.878366127266347	0.880656538189128
HK0032280VM	0.851560995205909	0.865162344387506	0.896348816378261	0.742062484239584	0.892786290553969	0.898239446290988	0.889528919506504	0.82705890694327	0.835470517065059	0.866352852882593	0.685115697783052	0.876028296150742	0.874006391433985	0.881398899013076	0.87017640133647	0.842312455955621	0.88236982083542	0.726510422726236	0.873452149740421	0.879017994644153	0.882794436645265	0.82329132391444	0.853264983611573	0.881990102672065	0.717229586923928	0.884560757611941	0.886697073331648	0.889502655277149	0.844509454355362	0.832394983664624	0.869145192881768	0.705899907612178	0.889066694467784	0.890653322356749	0.898442753792074	0.842155837146477	0.838936501632049	0.875235127553924	0.677994014476962	0.867755248768315	0.870430541639805	0.87629025993283	0.801411720784536	0.829607119731453	0.865800903876429	0.712938645151342	0.868692173616736	0.871807935545543	0.877069072431149
HK0032308AN	0.850122135621272	0.800397259262592	0.822885757083669	0.777794676953408	0.805310036168478	0.823954507718454	0.799037463222849	0.875276035579712	0.791329131251414	0.828003969523	0.725122332397871	0.811196668373243	0.811829258681803	0.789736510273813	0.854427995989948	0.746835256275824	0.817932813221077	0.762194003908436	0.776714398861064	0.791058184854392	0.789557740081519	0.872088803207225	0.783935222757274	0.797825498225843	0.753416121609191	0.802883708926937	0.802811896334325	0.803988372607966	0.878631421246479	0.762903949950248	0.803414657861387	0.746300181566859	0.817308323728679	0.812878584343821	0.812862243854455	0.863400903492538	0.790312332353606	0.80951477592916	0.719569871311496	0.795251875037895	0.802208744443201	0.805988779360684	0.862520351474624	0.76214077339441	0.802801791431725	0.759407269484437	0.778384495999585	0.782079420094136	0.811980276942259
HK0032308BCN	0.844978983533067	0.889706250204009	0.817602627034175	0.76351856408363	0.797107830718843	0.809354726763292	0.798590862954413	0.773561777132973	0.860834774076754	0.814951587994179	0.725943196288521	0.78995932060253	0.791476344917576	0.795428271069006	0.837774938604233	0.856099134577273	0.80129375436518	0.73083773462847	0.775890388782701	0.78903203382969	0.797397645636353	0.821199783735393	0.868704413475349	0.810868289354436	0.754424638790104	0.788976164942688	0.78389534466718	0.800691273860648	0.792357229140755	0.887595690473408	0.832232162128212	0.729081936567037	0.82494820505007	0.807942943398371	0.807099307403356	0.776000576440657	0.872094371057891	0.839810714539876	0.707584122921838	0.762113073141035	0.773123169563383	0.767741799159989	0.723628397056104	0.880675952390262	0.798685057821737	0.724123563598176	0.780967394532968	0.795097346008144	0.772078651943255
HK0032308CN	0.862203606541551	0.863912683186693	0.895732118833718	0.745592069118778	0.889494236188863	0.892314451510154	0.879059805027751	0.837443475495026	0.84627382149326	0.873005826838367	0.695880886957678	0.872215940388769	0.87424916838478	0.880600572377618	0.876751976795236	0.841796103123368	0.893127470506216	0.731518830214075	0.873681112416337	0.882875722598596	0.881502494827895	0.825211754455204	0.855853718642427	0.880794373518295	0.722814788484568	0.873990950856435	0.875417205404137	0.872505569956209	0.849398501762032	0.840204406073347	0.876862873430177	0.722931100324677	0.886270448658961	0.886678025250391	0.887302222814387	0.840118885205032	0.850688669610933	0.876579806565077	0.686953877346604	0.861941951514761	0.871669046143322	0.876438105250176	0.788519876277666	0.832462107222108	0.871314846651297	0.716201993723022	0.867353212973232	0.872073888163384	0.876665850668627
HK0032308UC	0.76904138348669	0.745902450515957	0.717009069650225	0.90045023804353	0.690579441226686	0.709872108049636	0.684832400135312	0.747768854996935	0.758930118527065	0.789705550323991	0.905471103987354	0.723842864360187	0.72175403966527	0.693104040606384	0.753602868381279	0.696663076599294	0.726278139258813	0.898064450409042	0.676461443378802	0.677688692974008	0.677119277409983	0.776833162131224	0.721087973911272	0.717849950693409	0.893761463349402	0.707689025610934	0.708051067376373	0.692218865258062	0.754535464658724	0.772728974610141	0.772868097076546	0.907124469200619	0.774693694665289	0.723644481640727	0.717435797280505	0.753175000188257	0.752634857142102	0.736148085282307	0.884475910659177	0.69025159180207	0.700752951425174	0.698353660275337	0.741657840022536	0.722460159660691	0.732601600128812	0.887631236260877	0.675731501296896	0.675810490596437	0.691345303268769
HK0032308VF	0.849909688936224	0.829691364685924	0.901244414627528	0.747179335784538	0.897224477049933	0.897136581788901	0.886139189882823	0.842473522993272	0.818580993139266	0.862723419606814	0.686163608281478	0.884909941486594	0.8833356035999	0.876707042267112	0.873072161529246	0.807875732238679	0.880706951326273	0.728626693512268	0.885008497804173	0.883230732724665	0.880766189740065	0.815821237722179	0.830484429243455	0.87913717508949	0.720856445901611	0.882329489153845	0.887924640744246	0.879650451140398	0.849955153809954	0.799952354401887	0.859635985392014	0.704667181617033	0.876744927616044	0.886460706906488	0.899983092418441	0.842983352235185	0.827710468901589	0.852645592980952	0.677257259488639	0.885791959445861	0.887079076965436	0.89268306782631	0.807186271825009	0.804346922647265	0.873459027681512	0.711535287013746	0.875167667580723	0.875835660385178	0.8871448785826
HK0032308VI	0.856180212045781	0.849743143489242	0.898168313617252	0.753818631178708	0.896752267333784	0.903947586764008	0.892963319010641	0.848930858200806	0.822151744811774	0.876345959006042	0.696356131219246	0.880030068882434	0.882111089843457	0.879428741096574	0.865902608669122	0.826623966235676	0.884504063157593	0.740531187827672	0.877324186129898	0.885721044437051	0.881474016287079	0.828794739967545	0.849475239414682	0.885460888527117	0.724678036719527	0.889627831481013	0.889701729362246	0.887098059127777	0.858284052438161	0.808223245336988	0.87117749256499	0.716889353388931	0.879416589987284	0.898128886202689	0.899293902829935	0.848794754333767	0.830131180305516	0.879916934297662	0.682030759748968	0.8780108184491	0.883156394760724	0.887534210186575	0.81206881149244	0.809545443686664	0.871724827265983	0.715605834994576	0.871489063464897	0.876820512080629	0.896043525548294
HK0032308VM	0.83770303831295	0.829446045727046	0.888986332485465	0.737059249091375	0.890043218329012	0.902445219042814	0.888825534015983	0.832201981498261	0.805616281528148	0.854732747299596	0.676836880252388	0.870572977800266	0.863899852993833	0.864118038869151	0.861334062366635	0.802639880299667	0.868212045118179	0.723631890626835	0.865458401550237	0.875368176653652	0.873160454475124	0.814549259939261	0.81715552322772	0.876415728912369	0.705558538330843	0.882945485475797	0.888426107105779	0.89659340331249	0.842331101133758	0.787040438955228	0.847702475087146	0.692812727370517	0.875306753557883	0.889912000102551	0.898068522514206	0.840269536350706	0.812937594039898	0.848301762571198	0.664490942012395	0.874826163218665	0.87765191914801	0.881665950285306	0.811705475490242	0.793098713876636	0.859780793287815	0.703825318330537	0.866108227522887	0.862998038874601	0.888966215668106
HK0032412AN	0.842543961639702	0.798891101407374	0.81805289839138	0.803716078871475	0.801563333391165	0.813507159683924	0.789987562505953	0.888548257272598	0.797554788367749	0.834862411019778	0.774818752794322	0.816703362945101	0.81664150755253	0.787516731636432	0.85636691345961	0.750904008556513	0.807103079105908	0.802285057509519	0.777673103516649	0.78388049504138	0.775742212212489	0.852546138550116	0.782363181120916	0.801047860235272	0.788960213385523	0.806728093320916	0.809525933774172	0.802487509449714	0.89485217021802	0.76987827981659	0.817444574349828	0.790334760450022	0.830112679061024	0.818198939052502	0.82308001896629	0.878678394059649	0.793345130822936	0.807850044285467	0.761759444414616	0.795761862989907	0.798480857681105	0.805219656951261	0.864994674650235	0.758675976901143	0.803630594809118	0.787098322756122	0.779407968246535	0.781412840062195	0.810122586055993
HK0032412BCN	0.847157465731313	0.889757024965597	0.845667984442606	0.733063763799918	0.824457593247991	0.837146499806444	0.830388374736667	0.797339978138399	0.863875377858606	0.827590404934669	0.692354726209512	0.817344788203696	0.823340784053871	0.834929878763149	0.866197612182698	0.884497238528947	0.847314258461849	0.707567868338553	0.819235239646009	0.826318939471973	0.833833339384231	0.806857919296841	0.869748558790665	0.83056208412241	0.719457104705622	0.819442653826876	0.816085108523599	0.831641080520612	0.827754234755377	0.870054837673722	0.861053286830493	0.695994568568862	0.838531669200601	0.841962557387164	0.842744326839613	0.801645575063447	0.852774944445391	0.868732002256072	0.678159276050238	0.801468036469445	0.805076814283285	0.815676970486635	0.740848633105388	0.867034672966839	0.822071596082236	0.694565889245615	0.818083303039479	0.818636544132934	0.808704840877139
HK0032412CN	0.857878493809077	0.862684110795756	0.881842733874018	0.76533717737187	0.864825404050066	0.870449003528286	0.853717705470993	0.809546289059176	0.856442637565871	0.87425729438386	0.727275730064633	0.851914551698009	0.858407052683024	0.86365831855432	0.881965028092087	0.863751532379553	0.88599377518817	0.74839365065353	0.855924390611683	0.867702827240487	0.862671128001147	0.811918278271994	0.862857161170838	0.86876437610398	0.755253583236196	0.861186630675186	0.855454012696903	0.858465233983351	0.834701096447937	0.85300551380585	0.884380687101489	0.744574304505548	0.878045552257737	0.878824973938748	0.868642084174293	0.821235967499231	0.855126794370533	0.875420680493099	0.718197813986329	0.845573287274873	0.851410286621611	0.857507236977601	0.773077764268442	0.837545801525548	0.865648770514827	0.731124618274112	0.850138438120618	0.853271837910669	0.850294414857435
HK0032412UC	0.751848792415989	0.710649798561214	0.698069475498523	0.903662688496047	0.681890454221506	0.700472758011615	0.669840021467246	0.747864043455405	0.728142372156985	0.783766287390609	0.90486570957726	0.720221446402385	0.714573005916402	0.677604465191725	0.737388229797964	0.658412464713077	0.714377927842745	0.905224451513662	0.664225153957419	0.663718704169265	0.660301771800383	0.765955760876648	0.691407586046544	0.710212524843341	0.893466674000396	0.704359447293306	0.70507134920432	0.694220841307662	0.755747397377703	0.731895121391035	0.746599944105308	0.909504644787562	0.765644210394185	0.712677975154103	0.714756945140179	0.755417155995684	0.72368334162495	0.720229998709292	0.892103823185864	0.692865035815238	0.695586055266348	0.693727465193304	0.744921294725835	0.693196124770403	0.725837093402629	0.892384209369953	0.664709953430248	0.668898386064647	0.694481405993222
HK0032412VF	0.833494771360937	0.820164017868867	0.879952815432548	0.748592589690239	0.886123330446412	0.885034539718065	0.870072279451459	0.844462233353187	0.803418914622415	0.867012845545695	0.696438198498652	0.873882096341632	0.870468836207936	0.865212376199521	0.859364253571535	0.795239123779096	0.871588869826909	0.736693986651668	0.863377535025593	0.87348371619791	0.863595581750943	0.82299106270457	0.823701101137211	0.885698262401395	0.726403733758169	0.882539482072492	0.884977842102399	0.879936687629955	0.854870410116807	0.788902326939792	0.850751947820199	0.716017763595765	0.876933023030041	0.884638757679398	0.887414352203515	0.85150080571107	0.810596392040795	0.85253349296612	0.68088822938908	0.875269049016316	0.874327837343703	0.883482791969794	0.818839797871221	0.788880521974786	0.855379341569927	0.712836386388912	0.863572725866533	0.855708228153351	0.888869420537736
HK0032412VI	0.842599425623401	0.829361783560826	0.891510224581756	0.734914789458866	0.892258663543697	0.886686584439784	0.880091084091852	0.82187089345026	0.825316656589607	0.86070350327026	0.6844715235151	0.874774538110719	0.873994308580026	0.87405292747753	0.867296913081765	0.827618452768696	0.882335081533686	0.719374445132357	0.88039585596147	0.881204158971425	0.874442167770567	0.801240615223314	0.829389033809189	0.886236529268617	0.72331737890996	0.879674082556217	0.88628721700638	0.881998753536901	0.837080187412972	0.809128756613446	0.867792863962928	0.705112050271523	0.888756325968445	0.886263604441326	0.899957282116387	0.830777131167108	0.827144006996269	0.856465946390396	0.674979197488149	0.880317194657927	0.877851243030588	0.883703085948579	0.78325391948859	0.812908030792729	0.862351432771921	0.695630204505184	0.865945116149155	0.871961703734857	0.877472919976167
HK0032412VM	0.836315374921062	0.839246277079172	0.882400913766324	0.722910323510379	0.877996645778308	0.869929589247739	0.864764824731546	0.815190409929783	0.827366782943217	0.863701175538448	0.668121794359535	0.860199664568067	0.865030009689499	0.867802261445518	0.861978138300739	0.840100938906723	0.877077532103759	0.701085481283234	0.868659949904532	0.876011096448604	0.86826502462083	0.792370646788128	0.837874646537016	0.874256233706885	0.69951046740762	0.867131800036271	0.866944535875342	0.864042894994442	0.828150456179057	0.81620276762385	0.873269438684602	0.689053889860368	0.87849694086761	0.873655913275705	0.880871079763271	0.818112423299354	0.827321247437958	0.851381835389478	0.665938794077482	0.856595794998127	0.855259619766536	0.865254085517115	0.759078362838729	0.816025533298341	0.855796581282587	0.684825681870508	0.867134503509887	0.863304441870769	0.855974480347703
HK0032413AN	0.83094549735725	0.826974240748575	0.80049883092279	0.781172443914142	0.782934088238694	0.802115589859617	0.782420556768536	0.83328847384839	0.813172541830985	0.815054354392915	0.746958121598625	0.800569383187479	0.787576326290249	0.774874440817973	0.833555385837271	0.771683904246478	0.789250272563556	0.767220284965884	0.751379535368447	0.769234696180603	0.772033552277157	0.85937470089293	0.802604783298563	0.79494682204534	0.77149183037548	0.79036936517286	0.79160921923574	0.795114407748348	0.831499345463575	0.826105665587432	0.796891478897553	0.756817682012764	0.811280387346859	0.803825652742584	0.795728329348649	0.836916796484186	0.817919128873553	0.796379034964545	0.735612857590357	0.769831222793979	0.779612173022353	0.769902771801992	0.802846427643365	0.812186108418506	0.782177519321503	0.763915616445039	0.763837658837888	0.765734615937655	0.781610798854631
HK0032413BCN	0.858869084730673	0.898576122598801	0.854307009003534	0.725428765149055	0.842511708211553	0.850041114973113	0.842664419367641	0.803716791782648	0.875152238123711	0.831346280024367	0.684458904781757	0.828229196298148	0.827618430148453	0.843568728218956	0.870851226314653	0.886717820881677	0.848029738562215	0.703284506408004	0.825735720413103	0.836048917415378	0.841045266463592	0.815362097271425	0.878070467644823	0.834956102873986	0.713830337020473	0.823832353695225	0.824287288144255	0.841575334311586	0.81653338257132	0.87048093284842	0.85044793966099	0.694363892730767	0.846353723894946	0.845812144926987	0.842931756076555	0.81476571130793	0.867399093045365	0.876790611931609	0.666890596996416	0.804434186173111	0.821954762837423	0.818948667975619	0.743185228381721	0.880369772571046	0.824836929089137	0.692807411342069	0.81966890174163	0.830030201840904	0.822676434808207
HK0032413CN	0.845293634665289	0.859444052258619	0.888134268675907	0.723800931997676	0.889817298239672	0.883032672770912	0.878528581165066	0.811798691029491	0.845772156861743	0.865227372367519	0.676096096909204	0.866281311312944	0.876817647119914	0.881624091378423	0.868601832783707	0.846947779555843	0.882274884638008	0.706032624989449	0.872819013499852	0.881826928951582	0.876888459692329	0.807680550090434	0.852702082847613	0.877113117077118	0.702727453298866	0.869332808027028	0.866892844996834	0.885244524132519	0.825974217505876	0.831700278470482	0.873419385046829	0.687056274622893	0.873149783627772	0.880516625132923	0.879675944368263	0.820014969017851	0.847122808839285	0.87408160549807	0.660503673918851	0.865018057128538	0.865941402102227	0.86716028580377	0.76641184723657	0.840564068495312	0.86238837051814	0.680249811369269	0.8687835610853	0.868611147306833	0.861920545303581
HK0032413UC	0.762184785768794	0.720576999718932	0.712255946870345	0.901245013216058	0.690688398121761	0.711080808831457	0.688246362867388	0.757328742884328	0.735040607390496	0.794485423610815	0.901174559860967	0.722359037502407	0.725161565612292	0.69298480251352	0.74602464442717	0.658887485216015	0.72249297733124	0.908728988749231	0.671756543199131	0.676848560191614	0.667817428324231	0.767422970249901	0.707963035142131	0.725207845780167	0.897172473191023	0.71593849404935	0.718676366877835	0.702897517968024	0.762218558946533	0.744445012228805	0.749454097098286	0.904934619516719	0.769931146349963	0.722532955004594	0.722236545446198	0.757745565467042	0.740481771495312	0.719051906779314	0.88592412542149	0.698699897114982	0.707593027492514	0.699721053827245	0.755491649765008	0.705726155117896	0.726731316382304	0.889751812108986	0.666921485431701	0.679433295646306	0.705676195231099
HK0032413VF	0.831873030528461	0.835870461459021	0.891345318477569	0.727703937573291	0.895734747710709	0.890006505462979	0.884232043627514	0.811120143825777	0.823373560791397	0.867693798075944	0.673023918770726	0.875652015245427	0.875882058568691	0.878421835718616	0.85568336062361	0.81817757747336	0.877748387429173	0.710460078731164	0.873532878958472	0.883760738074099	0.879795653288162	0.806978316970722	0.836496729114667	0.883444441470042	0.705709797498988	0.88285025625947	0.888377075690426	0.888973843890861	0.817805719055429	0.804889944762744	0.860531007225672	0.690600198087415	0.874832425719515	0.892460436861458	0.889849041162174	0.824537302833967	0.825682133291855	0.853553847417203	0.663734249118584	0.876696663119764	0.875333980680657	0.877784202560543	0.782194133708759	0.811263549214366	0.865561437441373	0.687276551224985	0.876072430319881	0.870268162931989	0.867676585971933
HK0032413VI	0.835165615267842	0.834959072867275	0.895536001065767	0.723395110630233	0.895598521292092	0.890794029672267	0.888354252594267	0.807962289992	0.822148444218979	0.863863873746701	0.668434947794391	0.873425296275356	0.87313225775756	0.874999591732579	0.86049528803531	0.819718135481073	0.874041174246472	0.703486346920609	0.87238767659317	0.878305077759692	0.872716966894357	0.800455086002648	0.833607940775443	0.881183176043862	0.703451952823237	0.880695760026492	0.88195367016017	0.890567267253826	0.817930478912339	0.808964639063895	0.861077941432371	0.684200117752904	0.87289160999474	0.889454674476114	0.889640356493266	0.817485496802653	0.829739881626292	0.855895847649527	0.661944492947528	0.870164062664464	0.871459262918571	0.879799643465976	0.766919699659678	0.818399778902952	0.867010879598767	0.680692040985278	0.874061867571623	0.87038277235721	0.866919895054296
HK0032413VM	0.850370047755478	0.856836186328859	0.893973718382183	0.750598036674713	0.888529251509314	0.892267330337022	0.888198159466059	0.838054846799213	0.840975031890975	0.871253956996171	0.696808867369881	0.883804687658047	0.877745038240573	0.879986700217038	0.875230608042129	0.838712185253155	0.8872719005254	0.737166208174704	0.875341122442459	0.877607796360644	0.878913189256742	0.832816707701164	0.84487891873057	0.880536327101442	0.731675989764392	0.878541880278045	0.886216072971881	0.889482296459235	0.850429708009163	0.830574981495806	0.874103379811435	0.71589599529453	0.882744836104506	0.889418753313076	0.894523272521693	0.842226047356084	0.839503574984883	0.880327281464376	0.685679819273226	0.874204226059034	0.876244007866517	0.878287112400648	0.798120513990791	0.827710359428413	0.864616478584849	0.717210911464903	0.865574861423981	0.86919200494939	0.873517362093435
HK0032437AN	0.866417123835285	0.836802535832272	0.868279665341704	0.792982267029257	0.855467713982346	0.86713819782427	0.841123896545961	0.86716148923993	0.838495073017694	0.859039422927307	0.748980894447817	0.852857447214863	0.860974408406427	0.842754288260014	0.883653435182282	0.817226032511868	0.867004423523887	0.780441103254734	0.841822104495585	0.842320305792688	0.841611187313349	0.844907990697839	0.831740069272566	0.85000537732192	0.770457121696403	0.845771430224213	0.845217817983008	0.846974849876563	0.883510891316217	0.821432201106517	0.858592910446459	0.769112448847697	0.868340653401313	0.862833016222051	0.861402357320404	0.872793065086073	0.838699918087337	0.859215242733395	0.732280337053055	0.835114097717045	0.844598912858277	0.847334188760746	0.836088126099773	0.810690931554756	0.84617815297934	0.761577035338777	0.824795156573091	0.83023663566506	0.85151015257245
HK0032437BCN	0.865225609857474	0.89179296429397	0.865124765174272	0.74368999245659	0.847235659707	0.85085473669235	0.843106311439244	0.817602903075781	0.880136854663693	0.84654166275402	0.704993111913262	0.834332348416395	0.846032731777244	0.847698641286468	0.884534188435164	0.890551927602499	0.864745351893319	0.721135053681316	0.837896037899956	0.843555941471824	0.850479036041731	0.813161216615633	0.886486388852125	0.841025808538043	0.723124423162547	0.833618937222457	0.829043088283922	0.839793066590983	0.839588292530459	0.871124627974394	0.875123557548468	0.711348498134614	0.852342857055663	0.851086825373746	0.851568316395013	0.818830392625346	0.868188376165822	0.87195630774519	0.68693569219952	0.812323234225492	0.819685829130022	0.826791620943712	0.75640748995984	0.869638882362939	0.832464842279372	0.700338909664386	0.83256738764571	0.837158582423292	0.82698653611723
HK0032437CN	0.861780455152615	0.865694392404458	0.899156879292421	0.744790227694818	0.881872218525368	0.883389917499941	0.876290092765905	0.821356225415672	0.853630145249939	0.868644834228382	0.688729908027175	0.872148660900538	0.874282575270932	0.880207949055773	0.889346553403899	0.856462385673069	0.899863684036226	0.717356226998056	0.87825500382689	0.882275202545158	0.878383100395523	0.812327994706039	0.872543468360921	0.868370302591432	0.71713674780792	0.862756417184805	0.866410092824909	0.855493967159704	0.836755485745875	0.846198935562061	0.888881262964013	0.713402219889203	0.882875600755293	0.879143617660985	0.879113519018074	0.827747630646136	0.856976926522556	0.871115716830569	0.686839435391142	0.856467686611993	0.859274651229284	0.871493445971581	0.775257421451295	0.843966151787492	0.865475930143169	0.703267926280709	0.869538829921472	0.870072536118704	0.855434806929666
HK0032437UC	0.750362354278264	0.731840676178804	0.693870455759529	0.896519406957406	0.676140203895368	0.691435026073003	0.665926974847524	0.723295530757477	0.747167514746923	0.770594093198135	0.910786405713574	0.700620553327018	0.704876654305464	0.676910084292791	0.734661146747424	0.677883210350569	0.711299359969227	0.890682107900301	0.660140965569891	0.658937057567444	0.654543409765265	0.753500817765142	0.711433362350524	0.708227150286079	0.888291980403706	0.692212554308427	0.68804125452459	0.676886804838349	0.735846806663097	0.761814283676689	0.756534162865127	0.897543212617457	0.762370864145855	0.708362812295888	0.700810079220885	0.735617421902572	0.73929492045813	0.713962643968609	0.889688125679069	0.670834887571041	0.680824559476596	0.678542456452476	0.715729022764916	0.709857353226409	0.707040683042236	0.877811595564424	0.653873859220821	0.66153316109895	0.674603199338462
HK0032437VF	0.850745487126109	0.853300564603257	0.90903426213231	0.721533808384336	0.90884064400561	0.91034254766887	0.902342233542386	0.82923529528435	0.832371446938728	0.869119059307135	0.658300356255536	0.880476231218798	0.890646092759767	0.888216696146388	0.878040062853901	0.841500098424542	0.903717485218999	0.700225184000997	0.898719708953593	0.906751916538365	0.896662639807753	0.81239680333118	0.84767044696705	0.892234670158591	0.691835043513321	0.889747518700507	0.891408076227614	0.893582080906562	0.839749237423624	0.814361163190902	0.874461235433	0.680087435384784	0.888751752797386	0.905767278660389	0.90943469162659	0.832699441033175	0.835133353403567	0.867051044346821	0.65222755870514	0.885621463442155	0.889910564773794	0.890406216196799	0.790112067140437	0.822714093745082	0.871257720598529	0.679981827805066	0.888706608809806	0.890003932089898	0.891172013059094
HK0032437VI	0.842400382922709	0.835948375582891	0.907264135359319	0.730930989302566	0.908305338320457	0.907920763135639	0.896506784712183	0.84036347176469	0.814560127188308	0.866711758765113	0.663719702410366	0.886020634006902	0.883085943990208	0.880596847679368	0.872853432186116	0.81857901387091	0.886783524300001	0.714389896894536	0.890318505897453	0.897067979164768	0.894850574214834	0.810211260829022	0.835007052813273	0.891068855244129	0.701637135352334	0.888066891304296	0.897702716769784	0.898126072031181	0.844686088637702	0.801037102060014	0.863379757324933	0.684166420168068	0.88081596492506	0.899764491891905	0.905937465439091	0.842742763349715	0.828362027352222	0.864817054071621	0.655716141154817	0.890478885706194	0.891925216894534	0.892320761332472	0.810757175815374	0.811926004551229	0.874963648625982	0.686415317246027	0.887988593796567	0.88959390533623	0.896703769472881
HK0032437VM	0.85144343024068	0.83803572928048	0.904474994022149	0.726666861430795	0.899734607363298	0.902420639999369	0.895536463078238	0.838979373839478	0.816868448043438	0.864450484859208	0.665915462364857	0.883297307071142	0.885043788242661	0.87647157981465	0.873311718634621	0.824791290591499	0.885044332792065	0.711185394415509	0.888878303589012	0.888879277063985	0.88783360687333	0.809491764441742	0.833698263776832	0.884798208334985	0.705815613770379	0.885471145789246	0.888908097597491	0.886351604999765	0.844937491029694	0.794421104797093	0.860519708160817	0.689803565334011	0.880506663190701	0.89580311908985	0.898799354652567	0.834699944365871	0.825943293848714	0.857653371195768	0.654905494533918	0.878221963334355	0.883406898269878	0.882418314000337	0.807454698051331	0.802218169992384	0.873361259184568	0.699382783108998	0.879452244367978	0.886384737622469	0.888319082754315
HK0032783AN	0.868477063510991	0.856274170185761	0.871073816509445	0.749185786076321	0.861324170782542	0.864834812993857	0.856446582719439	0.854123566052925	0.83405911106657	0.8492333719304	0.697432330147948	0.850204532168605	0.854176798701885	0.857868492326199	0.881077519128572	0.828271783202558	0.859821021283799	0.73740569772699	0.846666071752132	0.850729403200928	0.857106490393857	0.834605222889704	0.844222696829391	0.85440788043593	0.741624651075603	0.848883685173612	0.858881229948528	0.864177678829571	0.863431480649251	0.822139773064842	0.852267528887057	0.720670093709968	0.855024949076302	0.861237922091872	0.865192955891942	0.852565114431504	0.847033552725366	0.861875899197196	0.688788294678177	0.84456738719785	0.857033551680298	0.847412922757882	0.812297627927235	0.827856993773278	0.850476075148183	0.718023832020278	0.834091422155019	0.844295668355471	0.848672728313811
HK0032783BCN	0.865942833691616	0.887806737549932	0.852240851255515	0.748818732352516	0.843539525145894	0.856393282770296	0.849705148724551	0.81433136313842	0.861278452271884	0.830179138459373	0.699479190402983	0.823525170416029	0.831454300090587	0.834726929997941	0.873730501571431	0.870237315437795	0.842718251179575	0.722184553981522	0.823668795431321	0.836151225627312	0.842204998811092	0.826496135542513	0.868010556652387	0.843081459028146	0.726521540941834	0.835269061346144	0.828339474613721	0.846992011694002	0.833268992118684	0.862071334902317	0.856282839599777	0.707742622336944	0.852219386756852	0.850252509911222	0.85091553968566	0.822726681109326	0.855393838420951	0.872604613834601	0.685727634165423	0.819329158230729	0.823177064724229	0.825176232139333	0.769607882390615	0.857149730562135	0.823913011309341	0.712808432061403	0.824799713593751	0.834385460941694	0.829934217852727
HK0032783CN	0.844062288862373	0.837541110654237	0.880987504770476	0.75672205414783	0.878313918330994	0.88192033992225	0.87224348531396	0.811588916682981	0.826988130471476	0.867460790023808	0.698019336549804	0.874622280760198	0.875423003749974	0.868685456974433	0.859924336483396	0.831652709618343	0.885609424668654	0.7392332714421	0.880655561136108	0.881982597027756	0.881683898864361	0.806926416381185	0.833666379407189	0.872305209659069	0.735176137356056	0.867123713954289	0.873177176365461	0.870324739022988	0.833316779124553	0.81283269432157	0.86930558103245	0.725658048204664	0.883114046837014	0.884511417623894	0.886490744994004	0.827642762120592	0.837183940443499	0.865585504291399	0.698937897045542	0.869641577914637	0.869828233573168	0.879043929674864	0.794444686767841	0.804179653345834	0.882051581563571	0.726995774949042	0.872776778869073	0.869865756461543	0.870363575015907
HK0032783UC	0.757334619654325	0.71612928776863	0.697200686161004	0.900766852472983	0.6762722885655	0.692438647810969	0.663503159359762	0.749810387433353	0.737698102486958	0.782718517805365	0.907118431831038	0.712172582255319	0.713680063696984	0.675914248687628	0.740693353707004	0.654759941379631	0.711482115635731	0.905586403058409	0.663591841445616	0.66178437577626	0.659906336246957	0.762498537397604	0.696407241263089	0.708148123458555	0.898543773959245	0.697859397056698	0.696794445712125	0.684876124396847	0.757275729395187	0.735955695361742	0.745231084012493	0.910462247484242	0.759742697228989	0.707734015987358	0.708736580213848	0.75579198656509	0.735517060214369	0.71643010706937	0.892802156541936	0.677566317073667	0.697004063865914	0.687949930792203	0.747180129848236	0.695536664785587	0.726003533160933	0.893073792489359	0.657721998329881	0.662096738614168	0.685801956048217
HK0032783VF	0.82710011658479	0.811761327705369	0.9010069804366	0.711573161590828	0.904846968698376	0.903490196702864	0.888487828077278	0.823571460519567	0.795132866881774	0.853801424991778	0.647310517654203	0.881173559541386	0.883118643259802	0.879433198170812	0.861635927846993	0.805118825056985	0.894972974783781	0.692342472673441	0.89778053922403	0.896950659315403	0.890352792198874	0.786128224197576	0.816733304075374	0.880810554676345	0.685519995561308	0.889025545720345	0.898569397848834	0.88562557720331	0.831544276641605	0.771203470488821	0.851503525416509	0.675299264476019	0.877362058422126	0.889207250982325	0.902998184406436	0.82628893917833	0.81037687022223	0.843148778336366	0.642618997629172	0.893664977814508	0.896028936698295	0.900455270531392	0.795814169564609	0.783785690269384	0.870275425955465	0.67291562711272	0.889130530674405	0.87965141753659	0.891744064092504
HK0032783VI	0.825837244772153	0.804946702753976	0.898466542084986	0.716790081043839	0.894518564372962	0.895202887873844	0.886741808967925	0.823220722256787	0.794570495568962	0.852726824355487	0.653768152625532	0.884330634123755	0.881965178657872	0.871250426631713	0.855554896265317	0.795429922205161	0.889579659096044	0.700654174549666	0.886869773865382	0.888186256634432	0.885548005328191	0.787621459646511	0.813083113393549	0.878232934392007	0.687104147421602	0.879835400606991	0.889179165665552	0.887267402145227	0.829742474952821	0.7755522272382	0.854418187627771	0.677485972630099	0.871822464297758	0.88935702356581	0.897113684656959	0.829768277980297	0.811550100381776	0.844866283805049	0.648719658505108	0.883910243593607	0.895301051518817	0.8947336837787	0.801251656034353	0.778661589490503	0.872801668619842	0.679208806909688	0.882823730935747	0.875280039078343	0.886955695705768
HK0032783VM	0.838970318249553	0.835070848285219	0.896654960799129	0.706409380838541	0.898028569322077	0.896582327128231	0.889014950600378	0.816204777447866	0.817837972834973	0.847190914388862	0.635703596848537	0.878606872127945	0.872428461608285	0.87460026493763	0.861796886841791	0.832358300158259	0.888922763956875	0.68186803662053	0.88208588772302	0.89051986417587	0.89429565449284	0.798164732278868	0.832569892496572	0.881540745684854	0.679313902507666	0.875334460954935	0.882875773959932	0.87558905176057	0.826518378894777	0.800912341808542	0.86693015214865	0.664168002043883	0.868538405450402	0.884240524799062	0.88852142551966	0.819739496758409	0.822450296347683	0.856617200217989	0.633369504671167	0.883322392292092	0.880560258981301	0.887870485005059	0.781773981245611	0.806421101169707	0.868811158682847	0.664275220452979	0.883756565752758	0.875428335924787	0.883766646852352
HK0032839AN	0.84709032376453	0.856065287999265	0.817221778201327	0.787730981033046	0.814360123478499	0.827096189239255	0.803258916418768	0.839768359200926	0.830061198369115	0.817823287019114	0.755424974737482	0.806386108856945	0.806849037517574	0.798765225475173	0.862054815424414	0.796462562604738	0.799272704867109	0.769722680512228	0.771468614509563	0.782371135794268	0.789315552999035	0.863407593991754	0.836738894328413	0.81067917765545	0.772673136926077	0.811683640405675	0.814775903690006	0.815049155178923	0.850868329608225	0.833382616297888	0.818358424135932	0.759973485466264	0.829951994281271	0.822451020816945	0.819216043329063	0.847321916367159	0.832708597326025	0.822753240263357	0.728770570613034	0.788113269692508	0.791464001981278	0.790684087361064	0.798178898112515	0.826008059533787	0.795410618346679	0.761172025293247	0.776497832445264	0.791004450890494	0.799936434171383
HK0032839BCN	0.846946674097473	0.882817658281762	0.833306735504342	0.743749897126928	0.820111316387653	0.831489585270263	0.819853911863012	0.790757830258082	0.858350838991633	0.829263050601739	0.712677975979733	0.810108408808548	0.81128583011629	0.818742313356131	0.856203428037547	0.858957290466002	0.831263445382087	0.722981847154147	0.795992223240508	0.809349782033305	0.82080249528074	0.811323926891985	0.867083540215473	0.824058669270815	0.738723785303693	0.812181588107927	0.812239614693112	0.821001711278486	0.809304563754532	0.867703415122843	0.837911754755269	0.717655091600146	0.838377210751011	0.826187173553113	0.826553498656486	0.791733026926759	0.866439775069048	0.851698277232555	0.695814250422042	0.785852703758619	0.802986422342325	0.795969411321579	0.729772125545622	0.870783066180386	0.813627804216564	0.706663467783068	0.797205646334369	0.80885958347912	0.79631559701253
HK0032839CN	0.841593680040957	0.830116920275869	0.894175031974562	0.741257739416947	0.893309690343002	0.894448235777095	0.881919286564438	0.819509762958182	0.821410603106956	0.873744402192119	0.67757285774408	0.877110228811731	0.877614016753703	0.874679272731816	0.866701488267122	0.815868619907849	0.877980323966863	0.724532295186861	0.877452431085709	0.880537771085928	0.876114285579929	0.801018158591314	0.839484782887868	0.879184887505645	0.718548420163524	0.881744772087578	0.889349336991925	0.88543292139406	0.829879833487162	0.803680564407355	0.861395602715281	0.702510726973916	0.885129916752722	0.891443685143199	0.893071482540404	0.824832046581371	0.832106987316307	0.855524342682637	0.669786440599378	0.873956996504146	0.881248525616049	0.882383402368841	0.79148028674319	0.807951862647566	0.868891947786446	0.69617313187491	0.873484684964236	0.871096058749465	0.871379091277648
HK0032839UC	0.758445911048735	0.723231634195257	0.712061494427592	0.897004109421022	0.692815843076361	0.711248433994816	0.682030957690929	0.750806872943754	0.733009632089062	0.789741906915831	0.898536587260988	0.721946197028865	0.727294718066694	0.691881925841233	0.744355836458812	0.663530530194749	0.719240003174356	0.90222782399479	0.669421839428778	0.672961802080749	0.6691166714069	0.763290834421039	0.704266139550845	0.717464868205839	0.903479613368214	0.710546381528262	0.716461639983218	0.697685375796632	0.754967036112926	0.750411513678732	0.75398275287841	0.903396791061005	0.771482403024751	0.723757466312238	0.722294338291771	0.758316971751372	0.7438819751105	0.713650616217684	0.888721791322144	0.69605875651505	0.70545188131098	0.699197595638976	0.745779749646203	0.709013232617209	0.729695890136842	0.888493531161004	0.671483356763228	0.67688944223623	0.697179396219794
HK0032839VF	0.827687673994766	0.822644242876575	0.890864660895282	0.729571622700132	0.892356775390778	0.890106395970394	0.880219415369111	0.815443952990979	0.806364317532348	0.856095541918478	0.664211261699546	0.868528900288292	0.875006316093983	0.870845749962216	0.852657139228005	0.805085939881191	0.869033755337238	0.711763487345347	0.868431786352671	0.875271280798463	0.867376638026955	0.805233087201914	0.826967011357075	0.875418421968304	0.70234225817443	0.881684297635917	0.882492579474942	0.894852137571091	0.829532450799069	0.788462960693254	0.849077403156592	0.687847208106089	0.870090431085544	0.884462875182938	0.8883906493844	0.825839361172703	0.814625141873378	0.854593325680596	0.657274894488276	0.880426319998894	0.880596501067771	0.873478015302501	0.791267782931274	0.802181880032196	0.864687601501297	0.688656832979933	0.869330489373625	0.873183615040246	0.882966515524457
HK0032839VI	0.825191344112685	0.820179506868824	0.88461911723507	0.735644166667766	0.886885871765154	0.889505457600069	0.879986421967972	0.833147921084569	0.800683272014169	0.861767214799083	0.68210582886374	0.874881316129374	0.870852208944871	0.861253874311598	0.85054321581905	0.79048360866305	0.866424087900812	0.726742774370868	0.868743370759193	0.86829460178718	0.86479670341402	0.807443068924111	0.814011708188622	0.876484122925312	0.71195072760964	0.880071333139424	0.888321319390073	0.890569804907187	0.836306557892653	0.782582489526961	0.842956465381786	0.696188744489752	0.86794551262468	0.889721564108091	0.890412474362635	0.83322672782035	0.812198340358943	0.840161178397126	0.669554087223294	0.880448506894374	0.880667355704829	0.876566247359818	0.805446310300888	0.788087047729473	0.85795889761678	0.701292004178682	0.860960313350357	0.861905612540514	0.878797861953058
HK0032839VM	0.836380288962151	0.823964674274834	0.888985979867389	0.733970719261655	0.88685600166113	0.89528721763779	0.885172165696252	0.831577122628307	0.79809599652401	0.847010599112251	0.67503870978195	0.872318808570457	0.866624293628008	0.857650652835277	0.855563387550805	0.790937858967943	0.858656473284558	0.721670784365507	0.860197777024264	0.86277176732937	0.866820304202764	0.811632999578475	0.815390758958048	0.873031611759295	0.712013823903525	0.877603332984305	0.874835649364445	0.890348982053842	0.838968267157812	0.784028379056449	0.845193210050455	0.694220554839757	0.862336774247516	0.883628946229716	0.885437614854682	0.838683073306451	0.811809076281864	0.846660938583535	0.662332863255223	0.881473316095067	0.887109707959597	0.876436270829113	0.810542946688825	0.795675831310476	0.847150121458314	0.701486034850887	0.860785955601109	0.865437228616601	0.878288409294922
HK0033417AN	0.82693006639995	0.764857027084317	0.826972444213048	0.778930527838813	0.814225433835407	0.821435095784933	0.806406206805603	0.88433149455195	0.767819135869701	0.823294164383779	0.733275515508872	0.823363522862527	0.818137319249365	0.792650755434319	0.844571229524015	0.723783831041199	0.803933188728419	0.767961264682147	0.796589811485271	0.793842739188094	0.789201182666875	0.844783979056035	0.764527281915339	0.812538828237106	0.766674460224426	0.817524635911183	0.826477482024967	0.817742924576051	0.883197422374757	0.735059969996418	0.800843903445494	0.755730179207499	0.826369726369881	0.821757886209087	0.834355591115476	0.872055450115568	0.766579274966683	0.800044489942607	0.72891208502163	0.819130608132892	0.818184270539639	0.814968090293169	0.874208472018354	0.735237660147675	0.811940084469152	0.769017506121903	0.79385992934183	0.793543570790464	0.828633621232508
HK0033417BCN	0.851475024472255	0.89497968538185	0.850522482857371	0.739953701920983	0.831618755599797	0.837230390619065	0.833139897165251	0.804015464740277	0.872391327135269	0.831158302857971	0.710440612527384	0.828453809446156	0.831358209833847	0.840363600755395	0.872839677223068	0.880153500568322	0.847700762482231	0.717400517132396	0.823476448430923	0.828722568059729	0.829137758284821	0.821735395433278	0.874944121535163	0.832608311292404	0.73308513957302	0.823757047023066	0.824660670886351	0.829222876936252	0.827752138573189	0.873403952816607	0.856393125140322	0.719172552306889	0.85168203036509	0.841187048492943	0.840742157729734	0.813949429264452	0.856513681378641	0.862927414086579	0.693315431752737	0.803604500124999	0.811479960238984	0.818905666408653	0.74416165879964	0.867811595845138	0.81915647978242	0.708080758644442	0.815977556533142	0.816746253464626	0.815525145263167
HK0033417CN	0.843044145162798	0.846981762610815	0.883233583114206	0.741956180394751	0.877294062609513	0.881620736868715	0.869629919892185	0.816436590043346	0.838719627196916	0.86370997739645	0.691333134173173	0.873918451785679	0.872343973407174	0.866005387632374	0.869869799995828	0.839728876117956	0.879623326571122	0.720799062181863	0.873552056047093	0.881752096470857	0.872509267240724	0.816266533825181	0.849787894733757	0.878187169764014	0.72574929276348	0.87306896316528	0.874992031892073	0.869884945936282	0.832117584990766	0.832091183342387	0.872594889729477	0.719748965369049	0.878700985426456	0.881804211416999	0.88607715230928	0.825859899816645	0.842690620980511	0.861446040729824	0.679776479105021	0.860275754233704	0.866274127855376	0.867182418105208	0.778037635220049	0.831669326151465	0.869488240394455	0.71312919687016	0.866981537209219	0.865262476760054	0.860645118511058
HK0033417UC	0.770925450104238	0.735362666278597	0.726589844902008	0.905823674411074	0.705444194273731	0.724169894926171	0.701107293861848	0.77106218276798	0.74282787654182	0.801580797364759	0.897958402224641	0.734974499418901	0.732513526836506	0.701530829646557	0.758022268276042	0.671942370747255	0.727789051265144	0.90820616136896	0.681402956586448	0.689000538418064	0.6810685548848	0.7896548267432	0.716201028432837	0.733026550689911	0.895633164072456	0.730560197506286	0.728853185682676	0.725869244186515	0.771413419634566	0.752582816368249	0.763761285841838	0.908245533177302	0.783208807816967	0.737203157764448	0.738264322466032	0.774251976868612	0.742815126817111	0.731108540475314	0.886946966360019	0.703260358316548	0.715677000066344	0.717870834402966	0.768937510806762	0.717323456720161	0.751352950661375	0.897061014490644	0.683238140816228	0.692315629745357	0.718285719651119
HK0033417VF	0.836037492975808	0.829300244490749	0.888978374945875	0.72407841717861	0.892029833100968	0.886408305840214	0.877930428949131	0.819158128301845	0.811724726600738	0.853955277899709	0.668643596324907	0.876050549066666	0.875466907040998	0.87018624613619	0.859528852894158	0.807456475028863	0.871431508660185	0.699692352283982	0.874413092577226	0.879451373727464	0.870165776629362	0.809826405253029	0.83142771558301	0.879930694085769	0.708336120006112	0.88306065399468	0.881326256598584	0.88608464933627	0.828297115448901	0.80024123464108	0.858982783834658	0.689327022318352	0.873534248686689	0.883388643063428	0.892681857703701	0.826279656541211	0.824178835109408	0.852639563701808	0.657717455078533	0.871105694020129	0.870616979067143	0.873412305140852	0.782167852000881	0.807299229871463	0.865331154972821	0.692771332443674	0.875190912700549	0.867704335092047	0.871153397339393
HK0033417VI	0.846288529692537	0.842456150542198	0.887420230150869	0.714039038277797	0.888609666253273	0.886635333967306	0.882845398519519	0.815359537656142	0.829849669061995	0.859439496300062	0.659933556906488	0.876297907174437	0.874762789828193	0.87397540924725	0.868992522774452	0.832848077607632	0.875710778769402	0.693953392753413	0.87324673466788	0.876832552535453	0.875689684717709	0.81827481226167	0.843261567860519	0.878799071194597	0.695491039691014	0.884966957231505	0.878916360904305	0.885796265089801	0.825824050763377	0.816856568872899	0.86670807078078	0.677789650676798	0.876687177028342	0.890482019654194	0.889240943516443	0.824507520865335	0.835361244766939	0.860173272012524	0.651900551994055	0.866394636620665	0.863424683712379	0.872588835552986	0.778943020296672	0.819972240144408	0.853107286683872	0.685833061260944	0.873204282242252	0.877218761963644	0.872097639890481
HK0033417VM	0.853923588776642	0.855551691719449	0.89855158451484	0.732582656470473	0.893056479623297	0.887952524180234	0.88503823777227	0.832402473115474	0.836178626063246	0.862971341044735	0.676702702400305	0.879631658547462	0.878483260188127	0.886708115917589	0.873796049947885	0.838784474178232	0.886154212302121	0.713774166514627	0.871207679036839	0.882397757772097	0.880357721888661	0.821034147226844	0.845512945655901	0.880356088651572	0.714247274090751	0.878335808704935	0.881123019535306	0.882905423998943	0.844700439648436	0.825597600277592	0.875745484595459	0.700974614957634	0.880415822970028	0.887610137566846	0.883622896387005	0.836127621021036	0.839515751961123	0.868673961281531	0.665753294461211	0.873637363826362	0.882676378060088	0.875558459732637	0.799447131569795	0.829472891334887	0.863519811744171	0.702034065437092	0.877981168605356	0.878981916441584	0.87721631791906
HK0033518AN	0.84191094342573	0.794343041101474	0.826669857532224	0.79128833058948	0.805697587845891	0.817995152565322	0.794470103661519	0.894576726566279	0.788073866784967	0.826566409934337	0.755582957289305	0.8176315947674	0.818976757151927	0.787607992731443	0.853858070053606	0.740777595404363	0.805604150207368	0.781614144053936	0.789430718576803	0.786374259808642	0.791601100042756	0.862353744657067	0.781559348583612	0.804861717964357	0.766469856620425	0.809637239137806	0.809108056721149	0.806905545831991	0.885268513281242	0.763633770104481	0.802038207554156	0.773970907685736	0.825549883423516	0.818462908892823	0.817545106550443	0.883844339529947	0.783525464646403	0.802374744637547	0.737251630928172	0.794698603765528	0.805067966930131	0.806400079383707	0.872320295118714	0.759318462073727	0.797820069804316	0.775305876441358	0.7858122709833	0.785847190856165	0.817551330729249
HK0033518BCN	0.852389778060458	0.894224396872621	0.861528809025257	0.740142431863773	0.846394881662198	0.853879173041052	0.846238978889599	0.811143826419067	0.880325428819198	0.831734806847567	0.697295247492083	0.827982087425671	0.837637663478755	0.846475626081027	0.880543318838925	0.886448231976993	0.855341312421221	0.716420505967746	0.831076811498092	0.842018044398833	0.841130251431113	0.821433254537668	0.882713115822164	0.847089766063713	0.719930296245335	0.83119199411606	0.8338985906328	0.8547620611971	0.830112225038063	0.86874213235223	0.861267888395244	0.707203244526856	0.857802602651332	0.855944073065998	0.852554857975362	0.824520058096904	0.859222882132542	0.866947443831004	0.676325705058545	0.811873417422056	0.819391985287859	0.830506114740721	0.764054534956703	0.857497175726069	0.829988859077804	0.707903669655289	0.826044919239874	0.836785047671769	0.830696358587632
HK0033518CN	0.851687197576591	0.862630648017997	0.888656285794044	0.722007758701556	0.868858980710122	0.868668628211291	0.868730781695189	0.809055093680986	0.849628801786395	0.854581927167082	0.668852983245504	0.857822272784434	0.859043879358663	0.869328835521965	0.87446176561378	0.862077884774406	0.883606088400565	0.702062482168477	0.87590111392441	0.875529074623284	0.871963663758873	0.804691776182818	0.866497292098411	0.872758310618668	0.6976504482668	0.858632919663997	0.852642677783926	0.863846790423203	0.826568203055878	0.843615867996527	0.880547687927617	0.691056105177818	0.869894590139264	0.87407375419752	0.87423699029491	0.817024993867971	0.857670058813205	0.863511321034329	0.660962924894148	0.847107217219815	0.852415719109601	0.860943260398069	0.76384925182639	0.842071283243764	0.857187714810858	0.684436156957765	0.864260533115887	0.858971832680635	0.848103535357997
HK0033518UC	0.689688608978572	0.647985113015886	0.628230533971767	0.892353262731623	0.603329929427131	0.626795075732597	0.593135314238062	0.696567235787429	0.666615357541974	0.732156934084115	0.90891869249202	0.647038338389015	0.644038117107375	0.60377517331149	0.666648336354058	0.579475280782656	0.643599527885147	0.901374464789011	0.593731532529487	0.593842117573497	0.578521392298312	0.720682165384526	0.61955310545636	0.646721879372951	0.888463177121395	0.634781365668528	0.63774313374008	0.617102226784394	0.700229595060025	0.671877944250244	0.686744804291522	0.909087417731725	0.704777334310485	0.647716847871079	0.640928537611086	0.696480082301405	0.656904757679359	0.641295769546453	0.903803281346397	0.619431354362146	0.623716065845842	0.624515960515178	0.702944603408618	0.623400541286297	0.660919463009858	0.895509571059572	0.58449737962836	0.593168625498716	0.625598674289874
HK0033518VF	0.823762223327336	0.812943858208188	0.893639384576944	0.712161974662878	0.900527004528037	0.898909060615194	0.888203008503161	0.830431210416979	0.799544699070948	0.859351633649464	0.65455426170559	0.884351389738383	0.885602341154173	0.876238139609896	0.852445785065746	0.791778737702341	0.882702128491332	0.697933113011467	0.883491109024426	0.884477296445126	0.886056810822373	0.799468558797447	0.818247093961643	0.880578171839655	0.686803199234629	0.885396034865387	0.888350819164471	0.881068776290432	0.833307681629352	0.777576610260395	0.849018787817045	0.681167977931989	0.875900297248135	0.892427026142463	0.897114515728859	0.832870674959579	0.80701311788427	0.835883062945055	0.645259648823635	0.892542164414244	0.886786065188909	0.889782225087842	0.798374878936609	0.785569361199343	0.869582442088965	0.67447061398521	0.886001446617239	0.880193998149009	0.887994173866271
HK0033518VI	0.836772456847871	0.82033531429715	0.890596479716045	0.727153272663735	0.892966108700178	0.888506882522086	0.883702240181278	0.824417775704556	0.804173606986583	0.86019565724422	0.661018200555091	0.871715367725431	0.876609023869108	0.876137516702752	0.856465496406688	0.797347682182845	0.86950027390685	0.706705231251522	0.879555102837674	0.883460672724696	0.880147907438167	0.80679894224444	0.819957051115892	0.882709145951756	0.69929207869651	0.884203084381447	0.884088195991172	0.886265210331577	0.83424296591793	0.788260506540873	0.857816718002132	0.688142974504901	0.87360962889488	0.896694637429831	0.897534678542227	0.834545646088773	0.81291005915635	0.847060056579357	0.655839517751465	0.884108045583109	0.885331116431014	0.881271874795159	0.804951649046169	0.788199429316923	0.871985237193497	0.690127961695485	0.875153149819608	0.875058864969605	0.886187917847079
HK0033518VM	0.828792015732993	0.810611452328434	0.892888506872678	0.710680957415014	0.901914694736263	0.900759056217022	0.886752623213552	0.829406037601685	0.794029162569021	0.856454658032215	0.647654830557885	0.882846743492316	0.881955357719892	0.875532959292752	0.852570196547545	0.795698071897174	0.871560425466225	0.699518399525655	0.881488827235483	0.886050723433397	0.882771173083544	0.793695484585662	0.815332173772183	0.88341718380696	0.686697349065207	0.885043701485869	0.890705437983982	0.884490332061125	0.833820481472057	0.773911328454001	0.84303597929793	0.674913521048442	0.871698688408409	0.885720049166978	0.897132776438059	0.832385576976458	0.804307082628855	0.845082703370713	0.636365232416359	0.891871627200608	0.884991593314647	0.893261622311397	0.805384325105423	0.78447585095454	0.864365434580494	0.679465770507546	0.873660365848578	0.874434181356325	0.893645362229849
HK0033558AN	0.832372187365472	0.76607383733063	0.813457922787541	0.804576591347687	0.798061602011456	0.815014082722434	0.792948316194442	0.87349217610282	0.768636122978181	0.830079514591494	0.766227274791628	0.820519941641519	0.809405627702922	0.783206172233845	0.836215039856598	0.719193876443538	0.793137585225536	0.79414575487098	0.780724348570044	0.779092966316226	0.777998060796789	0.849878708096593	0.761432796336899	0.796551682936336	0.786830517534808	0.805817984241102	0.810442912650534	0.796580485174356	0.87135891289851	0.742239471215503	0.795662026654676	0.783429016216141	0.818666552447436	0.81009805176687	0.815298458842919	0.862567993057578	0.76828007194802	0.796461385833345	0.759402480025471	0.797842128579546	0.811142776630725	0.81188072679545	0.875757074690523	0.735690187259426	0.796529991407917	0.789000522063668	0.769713879505777	0.784144768227289	0.815923678618233
HK0033558BCN	0.85642472322038	0.891475367687363	0.856600399534144	0.735696647640249	0.833873648744092	0.844132386167051	0.83747828126577	0.809986441269765	0.865921259675142	0.826336308491627	0.691573091745762	0.830791649717242	0.82819375887657	0.834773352123643	0.869919360029277	0.885331770031932	0.845981948010006	0.711846944323194	0.822120384887395	0.83634125253984	0.832690732051441	0.802776479830075	0.870919346395619	0.828734143722588	0.717502627601476	0.82725339678711	0.824535819499745	0.837593866030392	0.833623737700874	0.863454387517259	0.853145444230774	0.698420637104354	0.846677313335905	0.841750838893036	0.843483570578407	0.812816275306345	0.854259917019565	0.864136480848171	0.679506022301532	0.806699132173873	0.814082508342576	0.814511809843549	0.743965960916685	0.863172468779251	0.818584033734381	0.69186157060098	0.819079018688068	0.826444341982884	0.819682498907343
HK0033558CN	0.840613192444798	0.837254874576125	0.879851957769503	0.770430398760369	0.87138943373506	0.866833875883448	0.867289609003892	0.807728365799276	0.829780708547396	0.870676264818926	0.727054862119669	0.856887987758582	0.864907881995423	0.864640004921203	0.856872062019473	0.823205633414183	0.8785119903389	0.744335077727872	0.862622410351732	0.87026017609567	0.859819378567257	0.814303479669059	0.838859793073811	0.871419396310121	0.747285940303519	0.862009049228808	0.863666463154974	0.855832666827332	0.818283230756858	0.827455165926408	0.875529482392262	0.74273094218351	0.875865993858228	0.878076021390047	0.875507919236279	0.818589869441459	0.840083405042444	0.855204967328217	0.710555102073866	0.850365068725422	0.855531016598866	0.862878362169901	0.777365179225435	0.813417724026197	0.866639632647198	0.738544895838336	0.860319848022192	0.8562237744583	0.854617432046147
HK0033558UC	0.774148773004035	0.744361069161785	0.727428648385504	0.905406542477374	0.708933254742422	0.726284620148715	0.703933167969726	0.762805155207653	0.755360966835114	0.804644216826693	0.90601901358963	0.735384841738086	0.738362766115804	0.710608065867839	0.758922303693009	0.688022794286011	0.741723513738572	0.905884484768088	0.69299345407481	0.694317709856272	0.693647829034835	0.78224172311298	0.727611209027108	0.742324591923354	0.893598939291536	0.73260707697224	0.730516094901023	0.719041401629146	0.77924206375058	0.762504897153333	0.777241792478375	0.907175582788352	0.789680312058719	0.743056770552967	0.743560605975522	0.77319862400209	0.758352115954858	0.740051075321781	0.887328149466832	0.710008069143043	0.719665588211655	0.713478590816776	0.760259063172838	0.718582735935548	0.748591149965451	0.888780508618623	0.684738962922168	0.69640561388781	0.715095857574077
HK0033558VF	0.840284588306221	0.835075638960765	0.908891227084313	0.70726758056781	0.906610715485747	0.900889751496794	0.895337894398481	0.819382442332874	0.82386432542862	0.863994187231787	0.641493477153952	0.885334286664723	0.887127359739305	0.885448138392494	0.863163475566072	0.827341439180522	0.891589417620762	0.682240606185253	0.886540502801182	0.9008494219127	0.896211029870928	0.792753373176511	0.834714030051083	0.888704033656608	0.684852505385822	0.88615164513405	0.890928737227614	0.884356878121825	0.819575686933955	0.803793673602594	0.866989073730121	0.669126264710648	0.882058488789983	0.896226632940399	0.899160458863323	0.817560212464561	0.831638284665302	0.857145053085873	0.640571833880117	0.885042507952701	0.883449929824488	0.893943528789294	0.776133252232442	0.813800412400743	0.880827549657982	0.667577860184206	0.891204334813818	0.884888640204804	0.887863911770942
HK0033558VI	0.829638491501519	0.83026747262345	0.906282675645778	0.699877017662193	0.905169436944165	0.906994475240212	0.898459598141647	0.816726256751266	0.810729353873537	0.850554977817366	0.639342602184996	0.88205735909324	0.88342847517034	0.88199084443588	0.861601109375228	0.820772720024066	0.887004016114715	0.68034508622698	0.891448732710263	0.89524598371878	0.890909492477053	0.791312251022206	0.828921798931461	0.88606977894658	0.671937028391714	0.889287064149075	0.892548793002219	0.890499994834259	0.82818042710528	0.792624995473264	0.860363283286278	0.654892340008057	0.882678359483858	0.895314313105243	0.898277954586753	0.819452018920554	0.814612685756375	0.847525459655005	0.62500083377016	0.886592240116276	0.888339997918523	0.893025997894789	0.781093686657206	0.79597846525565	0.863189944323292	0.661726731502213	0.886042163172132	0.884056972148062	0.884218609218001
HK0033558VM	0.829167413672912	0.831907519657382	0.895116906737833	0.687246062432935	0.900812472382114	0.90084603163125	0.897502946818825	0.805004857489429	0.81815077125191	0.851198832390542	0.624962135973798	0.880319473107757	0.883622024902352	0.879787317156208	0.856649531926552	0.835780553580308	0.889982842163876	0.666556157695162	0.889687028213852	0.895106778971295	0.889571482984981	0.778265625043894	0.83614148825348	0.879925504603637	0.665260215088109	0.884645172467446	0.889121159278816	0.87829157002927	0.817570469987099	0.79990573685008	0.85803473266258	0.64859709841758	0.875855584458948	0.890012957441398	0.893504008740141	0.807795301473297	0.819986990921478	0.852880340959078	0.619805264926206	0.883641148821095	0.885141346510049	0.889635373335693	0.759244285291244	0.805772672058927	0.866829721896744	0.64906168445964	0.888640954284057	0.88568131244442	0.876260977664445
HK0033575AN	0.827749006245802	0.795287761530801	0.843257216375322	0.758054102230273	0.826415220632404	0.852412403188016	0.827907835376655	0.874556116775781	0.786292124176393	0.81400894700376	0.70373200789935	0.825640378013457	0.81584379808381	0.808098850762614	0.858340486240167	0.753395230956551	0.820251515221035	0.738423167752518	0.798055732227312	0.809087250481747	0.806727214067542	0.84045284988447	0.780909609245892	0.813729354388089	0.721658727663497	0.818870001271804	0.826801390046645	0.834659369411159	0.879448611095151	0.748715092727323	0.811834580869408	0.715195757272319	0.823913880337417	0.826949147213101	0.835182275485879	0.866990308552141	0.77207429922318	0.811312785143923	0.685438301994731	0.818169916343114	0.81992585707972	0.826005289811505	0.868216654510975	0.74897192746072	0.799161828779419	0.739434172299237	0.8044429873093	0.797183977741035	0.83266770294128
HK0033575BCN	0.855421738412362	0.893346740499035	0.853902047798099	0.732283033521421	0.833730869723918	0.84794971754199	0.843783084081037	0.789295367444912	0.868209410581317	0.823618971871224	0.675849723608482	0.813258900126304	0.8133969779397	0.827814075016189	0.863755336722367	0.882588108489476	0.836655782297808	0.704149615322776	0.80940288786776	0.82564434612562	0.835548620028518	0.798246068431699	0.872119350941888	0.82574208201183	0.708477489115782	0.815140015438368	0.812457155757237	0.839018394520053	0.816297292733487	0.8713628173358	0.851193312906467	0.686506104672483	0.839393960021361	0.836585081495403	0.835121876500012	0.799390141515766	0.858503419004699	0.871294120310835	0.661096517072459	0.79578501652338	0.809206374446812	0.805656051981376	0.738820637447038	0.860893584763966	0.817510810467232	0.685434586995765	0.809827050384115	0.819084992357905	0.808923484444683
HK0033575CN	0.85529078233304	0.849215994478022	0.896809376947579	0.739174276630408	0.896838410480603	0.895923085411482	0.886458121849483	0.813861430587152	0.830978563048435	0.862854666953774	0.678295405667521	0.874264844049255	0.880404019888435	0.874230400341624	0.868031880938909	0.842324177956116	0.889321242418154	0.716827539794383	0.875195300058617	0.890985530764273	0.883409721958821	0.805094773177113	0.851034832259884	0.873052998456641	0.717916148309241	0.87139212592078	0.875763538903957	0.870763888473143	0.829084947688482	0.823922387342892	0.870060360595077	0.700778618464025	0.878028775711837	0.885617218506281	0.892660277200171	0.822160083892813	0.843673278051868	0.863910284730082	0.671026674003807	0.870778301288823	0.870955772297833	0.879490899891867	0.776915071264972	0.824865553232945	0.870605077642576	0.696108189754789	0.874206001481373	0.873398277535444	0.872697380830961
HK0033575VF	0.840015045680548	0.83691271524895	0.902363323885062	0.728358428381798	0.898337138550443	0.895978003034008	0.893921612214237	0.822458400271341	0.822609189894064	0.861529006745386	0.671095505620254	0.869995928143035	0.876884913565818	0.874269950153932	0.865058513863496	0.826621907041817	0.887885136617257	0.702354445418683	0.880603512793834	0.887326487267563	0.887058747328172	0.796229091005431	0.839229764493648	0.882918428802669	0.697254631002395	0.882216483056991	0.88259757025566	0.883707044980621	0.825697474494591	0.810428354478484	0.872374010427637	0.689626577229433	0.88184951862879	0.891410713208624	0.899819935419103	0.826669592815386	0.831863327704535	0.852580358269888	0.657105015490216	0.87741915560856	0.882669288484664	0.881683510515818	0.788106288845271	0.812102354135555	0.866385104656776	0.689930379127753	0.879527676971913	0.873364123577607	0.883255758388364
HK0033575VI	0.843457251929156	0.849688167276984	0.902583112447585	0.712817735509943	0.900073676056447	0.900476127054436	0.90174654497889	0.810231912639696	0.828452290950614	0.848385252699297	0.638765858335839	0.872196260304429	0.874095863101242	0.875543393761136	0.866285554474705	0.84623715616835	0.88597298614837	0.680910485717177	0.880782598140619	0.891774625049772	0.886507648216969	0.794425005851937	0.848705707202282	0.876481320872565	0.675950789829504	0.870120414728162	0.872623509556647	0.883897590448217	0.823652319810096	0.810515515203456	0.870802936650084	0.662930422204062	0.878425624469022	0.889226782874684	0.899957412877113	0.822877729135784	0.834060015228287	0.864570933970702	0.638310429410493	0.873474495765789	0.875574662385943	0.877331008117634	0.774567718832304	0.813178794610348	0.86348755607721	0.667282309887533	0.875962443224992	0.875403143173262	0.871427682499756
HK0033575VM	0.840358686950482	0.827384657777069	0.898210882006481	0.725933197756371	0.902308936300045	0.898752372412926	0.892723081467887	0.824450646075074	0.805310450347112	0.85188565728868	0.661930407057556	0.87433849124663	0.875592285946358	0.87156636881842	0.855119010605968	0.806358443253671	0.870347268629121	0.701464832194917	0.872432259231653	0.879091158786246	0.881812842766342	0.806420875950947	0.828061312347385	0.875855032919709	0.699445453412701	0.885982291604203	0.886393276247609	0.878367272258394	0.834626118331401	0.790080131256682	0.840303703312822	0.680942967239052	0.875323395779816	0.887282707782478	0.896554042809602	0.82859054908381	0.815312732595287	0.847587427094384	0.647167027166195	0.880512303315955	0.880410113910418	0.881070063101237	0.805066465310981	0.793080659425528	0.862790357121036	0.68818202423119	0.87240583221244	0.867737088191198	0.887219698852699
HK0033622AN	0.834341842627952	0.7741059611828	0.823978692189288	0.771266833318246	0.8070998117427	0.821003330265325	0.800557803216666	0.882365163998879	0.768349060943142	0.811759151059031	0.718492102216527	0.811814495387941	0.808223993235357	0.786885041124025	0.845786048913156	0.732719674075858	0.795892424217542	0.748323930119545	0.784755153681381	0.783910749906456	0.786167655374348	0.842217216933436	0.769731484904522	0.786276548432324	0.743872464341917	0.800135062902628	0.802010992057547	0.792946547192611	0.876079407565763	0.744822689839528	0.792059778677253	0.742734194630136	0.808816782288329	0.809113413083802	0.809358352768261	0.87377161470871	0.772192021925443	0.795390219377719	0.715212590968584	0.798117878402693	0.803487860604096	0.807086245028235	0.871680747637222	0.753875001788507	0.798639106477474	0.752406471226467	0.787470763316799	0.771016105108032	0.81479978637901
HK0033622BCN	0.872778656606029	0.891286292958245	0.869694767424331	0.775820184676583	0.854162663668105	0.863717496508215	0.858671938318106	0.834179151156535	0.867894027281403	0.859293070182429	0.723853027093974	0.851729048624995	0.850225794671032	0.854646610284772	0.884561957357442	0.878516915058736	0.862413119837741	0.751242457606809	0.844036499115356	0.843308633645161	0.850257518683395	0.827911626790927	0.875801500848432	0.85331356335129	0.749837117481823	0.845572183380256	0.841419225940891	0.851303764029859	0.848835487189778	0.868687657552042	0.868897800404393	0.739710098873399	0.863602037799733	0.858431994381534	0.86190595446331	0.837019956138266	0.863805982215453	0.879941173182098	0.71267710259454	0.829632840419307	0.834863049753763	0.840794133929366	0.786895634586477	0.861850397002573	0.841900565102769	0.739266374668734	0.835702645351789	0.839917259328029	0.841483492271871
HK0033622CN	0.833968369927317	0.815643610153969	0.839890029529299	0.845253800860062	0.823808142415561	0.833103880936821	0.81651170171057	0.815532927515708	0.818763801016286	0.863095693149037	0.806657864680981	0.823244349167915	0.835013990106781	0.816375587761018	0.844942796972371	0.787395389355364	0.845747159347152	0.830172165281352	0.810998687511353	0.818558456636739	0.806309753280975	0.820973490825513	0.80530725690948	0.832640217761295	0.821258079107073	0.824796842483726	0.829048771471509	0.814799630812896	0.833050139925703	0.8103539573029	0.848035654197346	0.830141364395212	0.866110019070748	0.83633090568175	0.834773026296197	0.825752488138917	0.821310505614679	0.823741568455313	0.804220399835374	0.816749747314011	0.823162205325334	0.824594883507125	0.793017684737857	0.7908553677517	0.835200545194797	0.816645748853162	0.802171645615846	0.808087098159345	0.827017771839283
HK0033622UC	0.718050102301262	0.66839049587679	0.65366274794804	0.90138612889039	0.639054867876107	0.65742978461735	0.626219276065048	0.715828753452914	0.686397460288766	0.745917133833532	0.908930169050469	0.672017442736398	0.667250534397955	0.630871431822994	0.697298638182336	0.600216667798993	0.669331147771966	0.910252970593695	0.613923612168898	0.618929449573518	0.606462055695409	0.733122873489972	0.647126782520534	0.667229722069801	0.900274934946507	0.665252426325317	0.664984051694831	0.647609242576204	0.720039736977144	0.69638393582185	0.707823542119935	0.914696077474781	0.729535715704835	0.675704241661808	0.670549835935888	0.727353242660324	0.688152461550986	0.670944994808193	0.904127967492708	0.639699615996545	0.654179763042684	0.64774862133752	0.728005319762279	0.645738896829229	0.686078775348194	0.900504273432922	0.614410554433489	0.616024781946637	0.646216286216234
HK0033622VF	0.845155216727763	0.829541879062936	0.899328756735389	0.752983397607397	0.899766118595556	0.898899302685724	0.890086165522824	0.835325433869297	0.821238027068809	0.87831517994169	0.692863495885613	0.885515416444098	0.890622953213881	0.878510076708684	0.870881095338983	0.81159369863113	0.89372210833202	0.737583960227786	0.882168410768655	0.889462082196645	0.883797884656454	0.808831271437873	0.835609025807364	0.879889958820017	0.724205361951762	0.884640684593468	0.887927078695283	0.881888966889926	0.846819504383533	0.802695904543837	0.866720059150733	0.718770863866222	0.889589511272322	0.897343338531854	0.896209074454451	0.841153778496816	0.832533848312202	0.852443776723729	0.690818523775534	0.885586370562623	0.892730836029487	0.893700744503738	0.806845958692767	0.806160794874942	0.877774235021994	0.718299539377964	0.881400893098193	0.873450126445884	0.889770729044243
HK0033622VI	0.847468834198512	0.832516504706513	0.895626940333842	0.755495335673525	0.89301853420317	0.891200569591899	0.884869505419797	0.82754950258103	0.81441234624227	0.870475601320923	0.698246443700348	0.873148885113095	0.877535177509062	0.874463886351411	0.866067211446997	0.817983818707829	0.887201784549577	0.739200219604636	0.874254377386775	0.881770376351756	0.881930974946726	0.806976985896768	0.831988598507553	0.878295826154527	0.728398433599238	0.877513801299522	0.884276828118088	0.872690920460182	0.844065264492835	0.803838374496613	0.870895382637813	0.722977622505307	0.886154424147264	0.887511220655018	0.890451834853002	0.839120945538978	0.836875787299037	0.85385502434626	0.699895428314748	0.874121292097449	0.880354113192514	0.880858757520708	0.803575240000256	0.802334078438573	0.869047061237946	0.721919640746864	0.867725276569115	0.863527364881325	0.879944474650398
HK0033622VM	0.84360206996547	0.829078617485466	0.907692064273312	0.732373219756361	0.902765024675867	0.903455092057396	0.892891925105123	0.832217652639278	0.812727401608613	0.864947142079816	0.670092204587294	0.885024943300811	0.887282488052969	0.884599716280391	0.868399290868677	0.819357824441098	0.890781362820483	0.720736479269299	0.889394418544258	0.893963569557032	0.894985534773333	0.808975097735601	0.835076438542241	0.893063176252505	0.708041949751455	0.886566852044971	0.89567315985275	0.888928311232768	0.838337582024488	0.800875658845412	0.861819830739414	0.696386853568129	0.891380349972461	0.901350034932227	0.904198359600521	0.833343774190937	0.824133307559981	0.849942321157508	0.666218849196143	0.88530554163293	0.892342835064461	0.901558200668824	0.79774750595332	0.802267237495052	0.874061391254323	0.69677709061076	0.883354032258244	0.88785481484709	0.893532901967474
HK0034023AN	0.83958856473991	0.878759370391076	0.836309093719368	0.695477811152869	0.817136234537034	0.824165019509914	0.817329035368249	0.771508281777434	0.861906678572273	0.811526342200421	0.659556598070198	0.805732578405012	0.809116517271918	0.820438444543673	0.859160122783599	0.891518135272092	0.838587939306682	0.66775712269912	0.816667274202555	0.830640649848624	0.830008047044787	0.790451937504714	0.872572257326266	0.818710566664981	0.685240260420577	0.806871269141855	0.801452456861394	0.807681484961327	0.785364592805196	0.8658950070355	0.84613119564968	0.667401900716699	0.834900295786977	0.830079807765199	0.823783838910972	0.774813168899949	0.861582159759788	0.853456914706524	0.644668356266577	0.785822045109564	0.798902564152124	0.800642628508617	0.709365815043392	0.869724638274618	0.809569837988426	0.65707033101994	0.80777244169135	0.812236685028221	0.792430253852508
HK0034023BCN	0.844632891274188	0.889614940812247	0.839034991301916	0.726197503044811	0.818211693833497	0.82414759789471	0.814702295035329	0.790086699235784	0.865399293095026	0.820331471561362	0.688331085701572	0.814630785239665	0.813472263642447	0.816106515147652	0.859062457582634	0.877409051618193	0.837209221586973	0.702228083309846	0.811503722678371	0.818584353739801	0.830061031099456	0.803918804098486	0.865092816882594	0.81830048226571	0.709770324462293	0.807570311272249	0.798467047023147	0.812652570792436	0.812642576701426	0.858520399314871	0.852731564703831	0.695781442500575	0.833894210730989	0.830494797507137	0.826622236121391	0.797870586926167	0.851675897428662	0.856163714633043	0.673342227835584	0.787699956944529	0.798670290240644	0.803313805625643	0.736136136742518	0.852387960018867	0.812079584979349	0.692330534566651	0.802479650739233	0.816471047739186	0.803176751184769
HK0034023CN	0.838692404604258	0.833040944582597	0.844850464946058	0.797450113451272	0.825415072479575	0.832513007630485	0.823301372097789	0.802488713243961	0.831166252671412	0.853727086441195	0.766902649218941	0.826067706164419	0.833931637104926	0.833021155704716	0.850258058440656	0.820031542460969	0.847418714033857	0.784598107217536	0.82453802129647	0.828545929432098	0.824984206334281	0.816719528043623	0.829390619198561	0.842283035617167	0.773681435636256	0.826840951983705	0.826000573371571	0.829854321147506	0.813835623480309	0.84017082293517	0.861451694477171	0.774292840520029	0.855709173702539	0.847062591157425	0.843919594759269	0.802218805845827	0.849679379688352	0.844503818214403	0.747909694066924	0.81107832511702	0.828374819739918	0.826250071210243	0.767228066364058	0.820407182511171	0.843625264999366	0.767617790763041	0.810914343743505	0.820264726382473	0.818808516720214
HK0034023UC	0.771490924310866	0.762052935986492	0.715718631361344	0.89004581970058	0.695587963148618	0.708773606877767	0.688750618324882	0.744865420903301	0.76602657447575	0.796674905800647	0.901102089025236	0.718561599761167	0.721670077627658	0.697643034466062	0.756031474412554	0.708320065479916	0.727143394917919	0.887694406728318	0.682360779965936	0.682480202831126	0.676743819067528	0.776230154174388	0.739828298740549	0.731964032444745	0.887903586006513	0.712295321506677	0.710448749996955	0.702297383011906	0.75877080761612	0.780042026463862	0.771938722760119	0.902411053520418	0.77642302321409	0.726178395729756	0.724437626295925	0.753770213113161	0.764171317210791	0.745307734831562	0.879377800449558	0.688622231909601	0.702047102491661	0.693896239617026	0.724493921304953	0.735880849874692	0.730842061192616	0.875911318023476	0.672306016100202	0.682841073524421	0.695540833222916
HK0034023VF	0.840085176029053	0.836734918163144	0.876118645616674	0.718199236450835	0.870113241903097	0.863558961005145	0.858784067137217	0.798200231442433	0.824720235166361	0.872335774819297	0.669836831854965	0.853627666818144	0.860437602647685	0.863079518554646	0.855840095919916	0.834119242798073	0.874921307624707	0.698845189199916	0.864915249582037	0.871476806577447	0.869059407832868	0.786002748743512	0.837964215646136	0.87463859833911	0.700407883232855	0.859808581109053	0.860371382960448	0.854582312466594	0.817955264303287	0.821041996678473	0.866567687708142	0.688975211804481	0.87193485043274	0.8756980281646	0.876682006249585	0.811077734527499	0.835013124017642	0.855235524292497	0.663265489628862	0.852876583532972	0.849391924094027	0.865230877398763	0.75870496661691	0.813651058770492	0.864719273413038	0.679939511999025	0.856272786683963	0.858500824341179	0.853967174360588
HK0034023VI	0.843463090458602	0.832868770599533	0.899627310999986	0.733094733620065	0.898144411185038	0.896182062204056	0.885767169056301	0.819762542233065	0.82336863579374	0.865754682478238	0.672318012544648	0.873557043109679	0.881572111178795	0.87878753060299	0.869424595460467	0.823323835743623	0.885096203198002	0.711183240392094	0.882028048257372	0.89040509945302	0.886991354149774	0.807215123831539	0.838752745702847	0.885766993868494	0.70980868828728	0.885117201600984	0.879080551033808	0.881648295106756	0.834514939501615	0.809579972984629	0.865529506402128	0.691953961879936	0.881791647275925	0.895047513842294	0.897597728329745	0.833766122627281	0.833117089095931	0.85376322453097	0.665112336120715	0.880425975555237	0.877121932784619	0.886175567912964	0.788117726103426	0.81047603581125	0.871280014198976	0.697871283469325	0.880705957425087	0.869808115648882	0.87740395115115
HK0034023VM	0.833945648868859	0.836725410853456	0.888171325738907	0.706844427303022	0.884537799722421	0.882460529475909	0.880984390651636	0.811883556154067	0.823625886554269	0.854757406838624	0.652963980005449	0.873278201042325	0.872254179432994	0.879759018205466	0.859799185574075	0.828136363668018	0.884709841090508	0.688782244309429	0.878177500993458	0.88552860377567	0.873027579681367	0.795848413327419	0.837439122975514	0.87225062472989	0.691856152185957	0.868180169436294	0.873944661155563	0.870549600878868	0.825146943973803	0.805217664404313	0.863077891224178	0.680130907883412	0.875340220863456	0.879028738536042	0.887324573133573	0.817381288547006	0.833833264974575	0.853153225118207	0.647347867790805	0.86846816764826	0.865545292387956	0.875528730429607	0.766952844753633	0.808685456147927	0.860511391508054	0.674432606677972	0.874220835661797	0.862562477419581	0.861971399599448
HK0034268AN	0.827872388134533	0.770171489818233	0.817711545813166	0.757159898521746	0.796654352822054	0.809449391621412	0.789822401842046	0.871295724073015	0.769413235818716	0.803045219825897	0.715178315199252	0.809387409337969	0.79702461365393	0.782595052390258	0.846838242402773	0.733613684937168	0.806578759143288	0.744795541188661	0.779700263096744	0.788128583653347	0.785307792320678	0.835014349923288	0.759862234015158	0.779893891174685	0.729432351665391	0.795026080992812	0.789133200400834	0.789583016716695	0.873927460369876	0.737122338875009	0.791341465963319	0.733058862316425	0.798212305025165	0.792471693012427	0.803058191579219	0.862542307300337	0.766044593063443	0.790092339581765	0.701167633845088	0.793596062573925	0.80332491974418	0.80457667694182	0.852405039611815	0.735347479122413	0.786981254735932	0.740022799232085	0.772524726855199	0.765780973643318	0.803988596487945
HK0034268BCN	0.851978883732965	0.875011195573689	0.855050691763929	0.769679299679912	0.838315853870371	0.841618895683008	0.832403258174515	0.8100216613023	0.851927084258842	0.837058931542162	0.717778634440914	0.821243975028954	0.825937857278616	0.826291180675352	0.87157696306143	0.868140664626752	0.846115110222132	0.742021318850611	0.820403660620825	0.822782725136754	0.831920594845882	0.808744823321768	0.859071484927837	0.832132401727613	0.742693877601614	0.817214348816234	0.815670540112926	0.827390569796962	0.824304126505076	0.857306158256274	0.850099648757837	0.725123137847058	0.848559305883717	0.837857883476341	0.842425554298509	0.816570600323313	0.849805094092457	0.864942631709072	0.709449681517427	0.80288613158551	0.817604641295688	0.819952368462582	0.755568814969401	0.845813950917362	0.821395213496392	0.727892285142315	0.808871378168227	0.814466224087545	0.817947312298862
HK0034268CN	0.850843685081541	0.87396632969	0.873771258520894	0.746583740527665	0.859229124841022	0.867558566073849	0.856551883682192	0.817666129032724	0.852783441368982	0.848422434032739	0.69412842270012	0.844850144049097	0.849159037270427	0.852914252929071	0.875489643920422	0.872817566989444	0.873568608973021	0.720666940708864	0.844354861883185	0.855460414968517	0.858060247005824	0.817134723282804	0.867694780019266	0.854991775037673	0.718535605231821	0.846944109932187	0.839490460344602	0.855814718026427	0.837706427331114	0.852603212480104	0.862969166550057	0.707603940512534	0.865986318535833	0.86128646926317	0.861847519526081	0.825635643468728	0.853027525570838	0.874049716860622	0.683726046332484	0.826619393290058	0.839118684319989	0.842060667508814	0.769368702225684	0.843610879636364	0.841240907380216	0.707538001887644	0.837647990402832	0.840430296525231	0.849782118486453
HK0034268UC	0.719724345053393	0.67714066981103	0.658902918953201	0.895687482163393	0.629495915646511	0.655310191606303	0.618414375555871	0.713088588218019	0.690018143503205	0.74970903712554	0.895739603281823	0.665962195594696	0.669410028549166	0.63340472051814	0.700815427331208	0.613778307951502	0.674486815463661	0.893339969563364	0.622791364352318	0.616822539890894	0.615055291790706	0.731871456642902	0.649720651595673	0.65777953857162	0.887857517347736	0.654966131841926	0.662447221250073	0.640930664111429	0.724526628829664	0.698237924657076	0.710179520112189	0.902827760815086	0.722344984485289	0.66709469789562	0.662998852443856	0.718169945313324	0.694939382935075	0.665520339380396	0.889160011454123	0.632737829176325	0.648853152209684	0.64279465425161	0.713324449690952	0.652159363310125	0.679208593623114	0.88892622641764	0.608490073879985	0.618052560445636	0.644347634146052
HK0034268VF	0.832987865521968	0.833371190435522	0.891318833415463	0.736610612531995	0.891771481258359	0.89146531523636	0.88352390963317	0.828437789621246	0.812847302479515	0.864742852720294	0.689726651719647	0.882495464143242	0.877634518882454	0.873333775038242	0.859040655390572	0.812327874194996	0.877362780923343	0.722666007802913	0.874632058667644	0.883989083232247	0.88039527959363	0.796193135369537	0.831234580978973	0.878348221341282	0.718216019737344	0.887066426535438	0.883393123202056	0.884504385071278	0.829933538211156	0.802178661845324	0.857605895399236	0.703504040377652	0.878303119034334	0.890337654616306	0.891992166075752	0.833389981495039	0.826107753674612	0.84728749381359	0.677784154422691	0.880967969375063	0.883720713812205	0.887670508065684	0.790699819218351	0.801902608880325	0.869192361804338	0.700760680237236	0.876466317781269	0.874168248620695	0.885903781912043
HK0034268VI	0.833217085112452	0.825968693004958	0.896737966160118	0.706631709454833	0.898838660017815	0.90312735879715	0.890671720423769	0.81438600503222	0.812389391614453	0.854965663755157	0.64892985909815	0.878867595027836	0.878094687775185	0.875970802561709	0.86025902389873	0.81588245230172	0.881302855257493	0.691891962604232	0.881566538371388	0.887102887173659	0.881348839891334	0.791662423758112	0.832091177847469	0.874106125676284	0.681871059975452	0.883485969640784	0.878983841220587	0.882450556969204	0.822927815156194	0.798867419563489	0.858273739257766	0.670603053665385	0.877333525976064	0.893377574394194	0.901059327404825	0.824804950436504	0.821439573992005	0.849335042123542	0.634804906997404	0.875220795818959	0.88563984347274	0.885886416639016	0.779058084292033	0.796845296863954	0.86456078403993	0.665938187173647	0.874563794233755	0.873091512460228	0.875654009904325
HK0034268VM	0.834892599345268	0.834265382557969	0.897360254798873	0.722520160697409	0.901863947912845	0.903961632224524	0.897483484555376	0.817352907300597	0.809761521538768	0.853391860462544	0.656572074301043	0.871222703850722	0.876813154552889	0.875173908831461	0.864634102193768	0.81830930994864	0.880870718524248	0.704550930202762	0.884051217994509	0.893249535566332	0.886168082483236	0.799977672412724	0.835963051955943	0.882274601978127	0.691380405586535	0.886744610867025	0.887906773282355	0.88955591389919	0.831066067710278	0.794988476987291	0.858271895692886	0.675712853043405	0.877729841530295	0.889659628761672	0.899502335616138	0.827674349860211	0.827224769664177	0.85051263819482	0.643408047148156	0.883493442646624	0.88408508883601	0.883933302893138	0.788976655709526	0.803752555347158	0.867619932490565	0.679024284904132	0.877626446825522	0.876550703575217	0.883960052966704
HK0034395AN	0.814874221877718	0.734493565717482	0.800664642729631	0.774315255310134	0.791002819362804	0.806824446045698	0.774556016894017	0.868481270464181	0.734864501160127	0.798475992925218	0.726444583756458	0.794957519379725	0.792025587906273	0.766387325225297	0.832008491477415	0.691769490118949	0.788395918186718	0.758921293965529	0.769648650887119	0.766541375888893	0.756282837333458	0.827969703216757	0.727810421248151	0.778304996243101	0.747655316235534	0.783912489185823	0.788656618696779	0.779223895586092	0.863937599352734	0.703563892653565	0.77263005486453	0.751342170106078	0.799896679362041	0.791754217924229	0.80234410228676	0.853210983721981	0.734781570355791	0.766566522074868	0.717715004970041	0.788136145408119	0.782531006775661	0.791896848832699	0.884047896784265	0.69951807829047	0.776391742974913	0.759263819003307	0.762525054932473	0.75451646490239	0.80067547921203
HK0034395BCN	0.853925341035046	0.87993380956576	0.833456473535205	0.73414281877779	0.804639404143066	0.817671429942961	0.812266786854563	0.778042976220523	0.86332151744389	0.820367945460134	0.69717862142365	0.796170246047475	0.803218783075322	0.812887329790535	0.866033388349014	0.871489964535288	0.836008845086755	0.709362487546375	0.79729092918789	0.808064227951856	0.812222542426998	0.807570336892898	0.875843535141425	0.81395123222598	0.721783855989568	0.793809128202378	0.786470164542607	0.79997837734681	0.793372304122487	0.893929028230241	0.851743159929967	0.708979760266641	0.831835942737036	0.817360360964151	0.80881860219514	0.775267915631437	0.878222126173169	0.844089265210328	0.679704879532244	0.768083990132031	0.781666980224715	0.785831733393227	0.728412341756518	0.880457205987255	0.802484006395663	0.694239104969617	0.80082184854572	0.803936912607155	0.776313949062521
HK0034395CN	0.847029700638326	0.842242444883266	0.851319550998456	0.79769383207145	0.847841357430398	0.860837230704918	0.841225830953369	0.805660942606972	0.835911480500282	0.864249923475814	0.752210718336892	0.840434519718464	0.850981525887233	0.844593303555075	0.856860907146179	0.825693507508771	0.86666570029644	0.778273741442472	0.837814851099552	0.843252898873628	0.841653851803877	0.813904716881911	0.832592363949454	0.854183363540408	0.775225414395785	0.842508004763126	0.839113301308506	0.845803833154305	0.824675602817031	0.834349943250403	0.875989279179025	0.773813199480843	0.865872726449904	0.860799444985108	0.852913695776288	0.820065691359218	0.842086910538978	0.848357959630127	0.743954423723101	0.834653469399865	0.835547140679942	0.842218875796979	0.776283838977614	0.817136343643171	0.850186538788462	0.765453573917268	0.83590198775857	0.832871648422884	0.841049135189444
HK0034395UC	0.725534913849371	0.681714517915736	0.668011981549192	0.906176303506986	0.644155524828346	0.665136561134309	0.633937109010369	0.726667065769991	0.699516805740841	0.757318352328569	0.916577724675756	0.675203789736234	0.675266582409112	0.641168081519683	0.708680256352107	0.619165659736033	0.677371823577584	0.908217857501996	0.622551219299608	0.627411229254374	0.619750753195998	0.740405507296284	0.660874027960174	0.675296941405734	0.895286395544288	0.669652213489466	0.669243595105617	0.652835651198899	0.729713317624892	0.706801124059615	0.718822162575684	0.91495307967205	0.740790173328905	0.68080263048353	0.679083388525424	0.731017315416151	0.69407379125223	0.672325273280225	0.897415400814264	0.63978931301036	0.653259891488416	0.656288439136779	0.722511131989969	0.656641600438179	0.690238729924274	0.898661583325805	0.626788666373412	0.630446398243937	0.653037006818435
HK0034395VF	0.834944696398703	0.825316852104807	0.895320160787625	0.71450722565673	0.890326048099693	0.891115351839531	0.884171510946809	0.814037688097728	0.805905496728138	0.860335865978628	0.649668948153231	0.874497816930253	0.875972225693155	0.875389894073524	0.860087023759558	0.812342146772777	0.882619595258298	0.697507199112214	0.887259336681531	0.887790831257017	0.878678342723008	0.790830000279837	0.828139398471229	0.878771327369189	0.685298298894424	0.879838851128825	0.893174666638569	0.879941719349045	0.826705047035958	0.794704548739775	0.857097937689144	0.675753334846739	0.879271931370666	0.887764647792438	0.889884671547111	0.823471835792577	0.82448909531423	0.848779821907711	0.643820018341249	0.874001279594193	0.880466241680725	0.888837462110452	0.787160927454247	0.799589385179848	0.873061614098772	0.672267631095083	0.888482802978992	0.88138731392509	0.884812025278732
HK0034395VI	0.830538705196759	0.81496047606202	0.901681495668561	0.711435141088782	0.90324688473992	0.897635021866951	0.892906972446133	0.819603249489902	0.807880026717745	0.854466809092364	0.647446368044968	0.882651423020373	0.877538037885469	0.878494164377526	0.854264817134188	0.808873551817391	0.882913267307318	0.691053388184059	0.885352727929219	0.894055245497459	0.885317741114952	0.787474425093817	0.822017179444384	0.880560797899396	0.682182747844741	0.886591554580883	0.890432324750382	0.888901059230244	0.828223503705898	0.783884329607666	0.858080063816142	0.671581381331104	0.876781040101976	0.892508503760522	0.896177004831728	0.819986521169641	0.816878826852941	0.844127862364408	0.642981166754438	0.889769831865217	0.884663504978182	0.89415594394353	0.784954829124209	0.791667244159242	0.871982163954939	0.668070069542895	0.880559096555574	0.874577116287675	0.892167707561461
HK0034395VM	0.847477237418758	0.830826650397795	0.900547999193559	0.720642322532503	0.893271317853482	0.90432707154294	0.898597276373352	0.821273462990853	0.811859511494943	0.859118170539054	0.649823057284219	0.875628093452656	0.878193311094397	0.87865587974047	0.867664480217834	0.822919644601343	0.883929514615448	0.70655103240504	0.888652854770812	0.891026272693033	0.882636949498334	0.80614603595702	0.828381590588983	0.886830584442324	0.693688266810797	0.883649527669605	0.885809767473203	0.882245411935796	0.834250358563345	0.799581882046081	0.862397646730773	0.683130734455638	0.8835779754948	0.895033618499653	0.897692723897304	0.830076181800294	0.832737368332793	0.856162598271646	0.649190732248813	0.880570084413035	0.882987463478739	0.893371288088986	0.800127869075208	0.800647282926794	0.87873614381887	0.686737419976372	0.884125265511205	0.876251982114834	0.879619011695712
HK0034425AN	0.833166571875867	0.782585633312305	0.820317422569874	0.785732002624097	0.801446673297241	0.822599185743436	0.805152660223123	0.866892953680293	0.773983247014159	0.820204960272682	0.742070736114776	0.800679774444106	0.801954818928649	0.790805139824713	0.844738934463571	0.732944955529817	0.802545455500315	0.776250347491	0.773959255434133	0.779752263635077	0.785169062212621	0.854294116827898	0.769575879645313	0.808707452647227	0.758048421212388	0.80556927574316	0.799591092818122	0.818335667419567	0.867882395057887	0.76059517511584	0.808242821524381	0.761330397833207	0.815292749582755	0.820771315192611	0.818954326819323	0.865295556241251	0.770858806874376	0.802722641384771	0.721545845109708	0.793907372530665	0.799965388393582	0.798526790319375	0.874879206002204	0.746892397170607	0.794263818407668	0.766384126805241	0.775754516699648	0.771809638814072	0.807935896930892
HK0034425BCN	0.856278747877457	0.88938299117383	0.859020101561352	0.72495779961124	0.838194324556613	0.839683522639376	0.833755395382799	0.790769444627074	0.877069024895748	0.835087252251436	0.689465526831233	0.828654433216315	0.837388820613702	0.839831802046095	0.874031188924893	0.884020249600435	0.855730125982126	0.707493366759104	0.829395508456706	0.841800597115501	0.844761314489556	0.809207668932046	0.891041238241225	0.838364293401414	0.710806016883353	0.821723582878627	0.815360087718996	0.830227043121808	0.815134151505053	0.884861617108735	0.878233182234126	0.701962442840612	0.85542382812801	0.84420254878905	0.841785736861642	0.803686032727973	0.872433837129577	0.87118454247059	0.675011515146323	0.806591564884109	0.813106537780756	0.817540522031408	0.735282446986466	0.879295391699606	0.825494476119105	0.69710450438206	0.831395515210827	0.838127891544234	0.811870764020518
HK0034425CN	0.838752500730304	0.848599783206957	0.885918195095354	0.719742024761923	0.879124335992873	0.872554279930636	0.87461074207011	0.816185159037499	0.832141941805599	0.855723306223053	0.665617027018941	0.86316130798804	0.866785300524146	0.870936413563562	0.871577436807894	0.836792037014162	0.880156673793095	0.702481596703363	0.864856298732315	0.877493818441995	0.876216923213692	0.798556584678297	0.847380767264693	0.865198831649166	0.697891473647514	0.855958438835738	0.860326989770899	0.864532059124284	0.829222052217406	0.815810027861285	0.870230453592121	0.689181859855678	0.871836722245345	0.871487876256601	0.879745684850287	0.817666213245595	0.835816928969905	0.875220362161116	0.65847720250654	0.857207824300712	0.866416749344641	0.867142572094933	0.775921225446827	0.819348076387103	0.863192899418217	0.676467919069843	0.860709066358636	0.859604954391147	0.860449915801139
HK0034425UC	0.803705445732058	0.761563913646493	0.778382401511842	0.888192554461016	0.75365713576131	0.770199879744205	0.742283513421719	0.812923930394241	0.768213878081008	0.825150473421753	0.866414060550679	0.778134876281756	0.78177017440105	0.749364808519606	0.803865466009134	0.705450028816276	0.781268294668596	0.881878165767493	0.742844597208195	0.749644286542276	0.735603246481878	0.816561642019113	0.745785864708758	0.771594182469929	0.874637857897599	0.766427178092598	0.768204672358616	0.758589729681628	0.82123692413227	0.762963441230849	0.797763136972185	0.886447162453374	0.812822720771332	0.783232624982695	0.780871990668261	0.815340161480967	0.771606349258911	0.774791016131199	0.858050235567147	0.750715772741055	0.770659163172906	0.764957656297655	0.812361982326524	0.732103584275138	0.790958531417987	0.877772297698469	0.734950646337719	0.737395126203348	0.761704030912445
HK0034425VF	0.832148575133426	0.813458745221821	0.89290829346145	0.731010292353106	0.888376374838403	0.894952916256443	0.884398800705235	0.832470035453865	0.80502125133515	0.85998441384423	0.674652689972236	0.877808892067222	0.890012122331643	0.877100387866753	0.852899438684635	0.800449149889064	0.872608451869161	0.717459916537394	0.875120295680188	0.886848182484915	0.882378047720068	0.799109430170945	0.818227606649825	0.876074361341822	0.716731075225136	0.881517546733398	0.883368093404514	0.882851973542616	0.833822029595519	0.776480504886273	0.85384697893558	0.691064890838747	0.871751606573214	0.894025023863775	0.892588570523869	0.834345232177577	0.816147974708363	0.847909054975002	0.670957356604344	0.887805011851639	0.895234226747228	0.895237666259962	0.799715911186345	0.786714015534078	0.877051694615293	0.700634966541499	0.873247159098591	0.875847372605631	0.885066212398183
HK0034425VI	0.833858699362285	0.823180418956885	0.888127995758093	0.733099296191217	0.891799077447157	0.889816348887226	0.879340348159253	0.81656031111987	0.820882121423272	0.858729290282005	0.672811149464078	0.874929822578227	0.883758139671552	0.8706890918884	0.858516977271702	0.815711529084357	0.874853294762502	0.708441978406264	0.868109388226005	0.88300997460464	0.87482238276405	0.787637323277286	0.823212277228814	0.875643234384069	0.706011187431534	0.874467774543356	0.872373375236669	0.875836336437501	0.822667345542873	0.798630096229235	0.863678688272856	0.70051612261299	0.886905208557041	0.884398562473198	0.888995427948444	0.821348608044637	0.826072559892614	0.850311142680687	0.670897089743532	0.87362399433097	0.876267970258393	0.881240503364419	0.783410559155299	0.801751845174409	0.864919945294645	0.690479241052729	0.875333514894882	0.866819974703321	0.873293685828086
HK0034425VM	0.836115179423509	0.828038602599054	0.88562100614419	0.751844922906224	0.890021874603254	0.890146914922035	0.876479305914854	0.835461603983712	0.819385656533605	0.867074552486076	0.710326793823167	0.881358291610787	0.883437547176407	0.867154476305636	0.864533540217384	0.808207563826243	0.875991222302055	0.747259915065419	0.873697959298007	0.879659530280161	0.86646063106232	0.814440120926146	0.825924429087299	0.88163614075878	0.738985620272476	0.88296021613801	0.878989857753004	0.877564124907669	0.839402421385379	0.802762267032572	0.861746214559405	0.732912632888332	0.892240081180164	0.892997040912696	0.894487501186647	0.844378235364819	0.826761649058755	0.848431633932907	0.69518730979408	0.875055773644327	0.879022217439558	0.882232676279214	0.813113044411376	0.794473482671146	0.867802519110147	0.725794600503131	0.87348740758546	0.864484046284825	0.876956138040365
HK0034431AN	0.800690180449662	0.716918312139673	0.796575021434036	0.753022072226694	0.775743837847747	0.797825922928349	0.763551268756185	0.863333184517678	0.717954424348614	0.792764394655852	0.699288202234371	0.797313575241451	0.792578553796658	0.761658938926114	0.817466301032331	0.672014111117995	0.780872838107798	0.740831108338189	0.768984239561284	0.763568915428498	0.759451992473161	0.828837475432055	0.714152162174572	0.767221653970047	0.729680135693189	0.775716397812293	0.787018020599667	0.776738160363875	0.864635057626922	0.682412388843929	0.763191485654817	0.732674448587323	0.787020353165994	0.79146912717514	0.79368452011464	0.85097085847225	0.7212708055975	0.753098603340985	0.698621938284094	0.787199704692215	0.784592020936536	0.787626182073388	0.87696440677933	0.688142180231264	0.778691218065449	0.740648020803778	0.762044436977343	0.756770928376681	0.797407311039943
HK0034431BCN	0.870013291454257	0.882037382943022	0.877416472682248	0.754157651947504	0.859048132502964	0.869591769398594	0.856131905046465	0.81894988757648	0.869990288050757	0.852920454146817	0.703024104893204	0.850207196823567	0.847103242003378	0.856806828783477	0.887187942328981	0.876979395386095	0.871136590296913	0.727329356261494	0.853528507476792	0.85676442404068	0.858441584519124	0.818968230716684	0.879018851616974	0.855183706337634	0.73440503970246	0.845469021968207	0.850483569002512	0.859280943269216	0.846734785837225	0.863092418836703	0.876650158953226	0.723023547249483	0.864536182905807	0.863021999753109	0.865749057550718	0.827818123810179	0.868215442990483	0.883503546549211	0.690271055123113	0.833014939121981	0.840382253657669	0.840814688325424	0.772769146122001	0.860272031169307	0.846979008400422	0.715297674357333	0.844081989657738	0.843226761101967	0.841560057359553
HK0034431CN	0.83224726601612	0.813701738741759	0.863950201324888	0.785420720222474	0.863222055582202	0.863316643662912	0.849432410647425	0.808636770541088	0.803382417707279	0.860594376357295	0.733774447574452	0.859640147993726	0.858124339299109	0.855333506106271	0.842049914683639	0.786909353911627	0.863291699149216	0.769234101620954	0.854353840702637	0.853289580358056	0.850156173049559	0.799176370132121	0.810676599838316	0.862213098376512	0.762001576036801	0.858071226614212	0.864595220587907	0.855172414156766	0.832400137279516	0.793371001637764	0.865262673314206	0.757997862928724	0.876795274857927	0.871204599368572	0.870255158676336	0.80944626681687	0.81519540721516	0.841561398925525	0.727467386152234	0.855523834884866	0.865657356001871	0.868776555574035	0.792867754505226	0.781935252388904	0.859030338796033	0.755238854745838	0.852814809919519	0.85398052197192	0.853225875585325
HK0034431UC	0.712166858866531	0.654454993206465	0.659506324975173	0.905538415083726	0.638127154981191	0.660818884455013	0.626019876450546	0.725508054479265	0.673763916941838	0.756614746100648	0.912606103996363	0.675366135039768	0.674696747401177	0.630866610069655	0.695825586432824	0.588322557461506	0.672463064805409	0.914129218129158	0.622559996080501	0.623434695089693	0.612922429614131	0.734067524447845	0.640478333138236	0.671909710105319	0.899732977745833	0.664540547802816	0.666601762794247	0.648153935185543	0.736678494286803	0.675957676323835	0.71535242365135	0.92135807941411	0.730734194701561	0.672375209778772	0.677103346582006	0.728872015194511	0.677325354875584	0.663518443463665	0.904318720102908	0.654990912742871	0.656561061552722	0.654858337621598	0.741239588128383	0.630657903902435	0.682983570545581	0.905073508357301	0.615077716915435	0.62304707889833	0.658965495442689
HK0034431VF	0.840493613546838	0.830075205475479	0.900179895160994	0.745550866793078	0.895347522401415	0.901792736158902	0.884451864016819	0.833818729862352	0.818015645869984	0.865781878681966	0.68878910847403	0.883668637220189	0.878064363582429	0.874433968664397	0.867575740283215	0.806738456091522	0.87826276796513	0.735164500194107	0.873541361180537	0.888436512466249	0.880065089657557	0.810396610333037	0.829890885215559	0.886590632733969	0.719537383816242	0.891521412499032	0.892066515106426	0.888660721732742	0.848754267820755	0.79738130499504	0.859767553320223	0.709558374023169	0.88486594028084	0.895834309598853	0.899215533592067	0.83731083814601	0.825510847555204	0.852291305570414	0.67897421797297	0.88302791587486	0.89048186830974	0.884190591274139	0.8134833236973	0.798121801410313	0.870055093227692	0.713474910925423	0.872260128054306	0.87977640555823	0.890148788215799
[truncated: 3,931 more rows]
[truncated: 437 more columns]
